# Supplementary material for: Dysregulation of ribosome-associated quality control elicits cognitive disorders via overaccumulation of TTC3
Source: PubMed Central journal article supplement (PMC10041068; doi:10.1073/pnas.2211522120), 2023-03-14
Supplement: pnas.2211522120.sd01.pdf [file pnas.2211522120.sd01.pdf]

**Dataset S1. Translation initiation of selective mRNAs was affected by the deletion of LTN1**

A list of ranked genes sorted by the difference in footprint number at translation initiation site between harringtonine treated WT and *Ltn1* KO neurons (*Ltn1* KO-WT).

| ID                    | ( <i>Ltn1</i> KO - WT) | MGI.Gene/Marker.ID | Gene Symbol |
|-----------------------|------------------------|--------------------|-------------|
| ENSMUST00000034756.14 | -2.385549114           | MGI:88246          | Anxa2       |
| ENSMUST00000048184.3  | -2.308250021           | MGI:1859170        | Pdcd7       |
| ENSMUST00000107376.7  | -2.22657363            | MGI:1919216        | Nkiras2     |
| ENSMUST00000023362.14 | -2.183933329           | MGI:108471         | Ntan1       |
| ENSMUST00000077485.10 | -2.139994267           | MGI:99157          | Zfp12       |
| ENSMUST00000067444.9  | -2.009807435           | MGI:95697          | Gfap        |
| ENSMUST00000022115.13 | -1.999527654           | MGI:1333799        | Xrcc4       |
| ENSMUST00000022705.6  | -1.94949253            | MGI:1914631        | Med4        |
| ENSMUST00000123251.8  | -1.897659563           | MGI:96925          | Mbp         |
| ENSMUST00000204930.2  | -1.897659563           | MGI:1918910        | Rarres2     |
| ENSMUST00000044567.3  | -1.843894724           | MGI:1913498        | Alg5        |
| ENSMUST00000183425.7  | -1.788048413           | MGI:2446108        | Hmgcll1     |
| ENSMUST00000229696.1  | -1.788048413           | MGI:98509          | Tfcp2       |
| ENSMUST00000021810.2  | -1.729952952           | MGI:99414          | Id4         |
| ENSMUST00000028199.11 | -1.729952952           | MGI:1353605        | Tor1b       |
| ENSMUST00000216152.1  | -1.729952952           | MGI:1919093        | R3hcc1      |
| ENSMUST00000003154.6  | -1.669419546           | MGI:102707         | Efna2       |
| ENSMUST00000033800.12 | -1.669419546           | MGI:97623          | Plp1        |
| ENSMUST00000050630.13 | -1.669419546           | MGI:1923723        | Supt3       |
| ENSMUST00000027157.9  | -1.606234583           | MGI:1913896        | Rpe         |
| ENSMUST00000030317.13 | -1.606234583           | MGI:103098         | Pdpn        |
| ENSMUST00000037099.8  | -1.606234583           | MGI:1352754        | Clic4       |
| ENSMUST00000057497.12 | -1.606234583           | MGI:2155345        | Col26a1     |
| ENSMUST00000059562.13 | -1.606234583           | MGI:1920048        | Lhfp        |
| ENSMUST00000031122.8  | -1.584823034           | MGI:95619          | Gabrb1      |
| ENSMUST00000202447.3  | -1.552854943           | MGI:1924223        | Fbxo21      |
| ENSMUST00000013886.8  | -1.540155087           | MGI:1924258        | Ppp1r12c    |
| ENSMUST00000022586.1  | -1.540155087           | MGI:1351474        | Nufip1      |
| ENSMUST00000029649.2  | -1.540155087           | MGI:2139628        | Ctso        |
| ENSMUST00000038626.9  | -1.540155087           | MGI:2681846        | Mpv17l2     |
| ENSMUST00000113102.9  | -1.540155087           | MGI:1914361        | Naaa        |
| ENSMUST00000108634.8  | -1.521950517           | MGI:2681835        | Nlgn2       |

|                       |              |             |          |
|-----------------------|--------------|-------------|----------|
| ENSMUST00000034989.14 | -1.511728424 | MGI:97043   | Me1      |
| ENSMUST00000097822.9  | -1.49640751  | MGI:1916366 | Ubr4     |
| ENSMUST00000055104.5  | -1.479906682 | MGI:2385317 | Tceal1   |
| ENSMUST00000021903.2  | -1.470903073 | MGI:1346325 | Gadd45g  |
| ENSMUST00000035222.5  | -1.470903073 | MGI:1928738 | Slc25a20 |
| ENSMUST00000043722.9  | -1.470903073 | MGI:99554   | Lgals3bp |
| ENSMUST00000048642.14 | -1.470903073 | MGI:1277152 | Parl     |
| ENSMUST00000056370.12 | -1.470903073 | MGI:1914287 | Pmf1     |
| ENSMUST00000060447.12 | -1.470903073 | MGI:1922672 | Mettl5   |
| ENSMUST00000037827.9  | -1.459729871 | MGI:2653235 | Slc45a1  |
| ENSMUST00000048073.8  | -1.433075272 | MGI:2687325 | Pigs     |
| ENSMUST00000003501.8  | -1.430189623 | MGI:109157  | Elavl3   |
| ENSMUST00000029907.5  | -1.410090644 | MGI:1915303 | Ubxn2b   |
| ENSMUST00000045301.8  | -1.401936759 | MGI:107502  | H1f3     |
| ENSMUST00000020023.8  | -1.398158481 | MGI:88930   | Reep3    |
| ENSMUST00000020849.8  | -1.398158481 | MGI:1919193 | Tom1l1   |
| ENSMUST00000024957.6  | -1.398158481 | MGI:99462   | Pigf     |
| ENSMUST00000061890.7  | -1.398158481 | MGI:2141413 | Zfp282   |
| ENSMUST00000101426.10 | -1.398158481 | MGI:1913308 | Tmem176a |
| ENSMUST00000125544.2  | -1.398158481 | MGI:5141896 | Gm20431  |
| ENSMUST00000129635.7  | -1.398158481 | MGI:1891341 | Lpin2    |
| ENSMUST00000161211.7  | -1.398158481 | MGI:1917042 | Med6     |
| ENSMUST00000011981.4  | -1.386796361 | MGI:1914861 | Snopc2   |
| ENSMUST00000034015.10 | -1.3742772   | MGI:1913484 | Msmo1    |
| ENSMUST00000026142.7  | -1.340847245 | MGI:1930187 | Maged1   |
| ENSMUST00000033770.12 | -1.330365505 | MGI:99918   | Mecp2    |
| ENSMUST00000025217.10 | -1.328736592 | MGI:96245   | Hspa9    |
| ENSMUST00000025739.13 | -1.328700899 | MGI:1923718 | Uhrf2    |
| ENSMUST00000042546.3  | -1.328700899 | MGI:2143103 | Ano10    |
| ENSMUST00000005431.5  | -1.326740663 | MGI:1932557 | Letm1    |
| ENSMUST00000026434.12 | -1.321550231 | MGI:3583942 | Chmp6    |
| ENSMUST00000186733.6  | -1.321550231 | MGI:2446126 | Phf3     |
| ENSMUST00000004375.15 | -1.295693639 | MGI:102520  | Phb2     |
| ENSMUST00000030367.14 | -1.274519194 | MGI:1919725 | Ssbp3    |
| ENSMUST00000048653.9  | -1.268167493 | MGI:2387578 | Cpne2    |
| ENSMUST00000020922.7  | -1.254277519 | MGI:2145021 | Trib2    |
| ENSMUST00000040344.6  | -1.243056202 | MGI:1922862 | Gns      |
| ENSMUST00000032840.4  | -1.24257354  | MGI:1915244 | Mrps11   |
| ENSMUST00000000939.14 | -1.240644771 | MGI:1352504 | Hip1r    |

|                       |              |             |          |
|-----------------------|--------------|-------------|----------|
| ENSMUST00000025161.9  | -1.240644771 | MGI:1201689 | Tapbp    |
| ENSMUST00000035094.13 | -1.240644771 | MGI:2143333 | Exog     |
| ENSMUST00000060188.13 | -1.240644771 | MGI:1914099 | Ppp1r2   |
| ENSMUST00000064848.6  | -1.240644771 | MGI:2143854 | Nup107   |
| ENSMUST00000095759.4  | -1.240644771 | MGI:99252   | Egr4     |
| ENSMUST00000115168.8  | -1.240644771 | MGI:1914244 | Cep19    |
| ENSMUST00000192512.5  | -1.240644771 | MGI:1298406 | Pcdha4   |
| ENSMUST00000212075.1  | -1.234647324 | MGI:1925350 | Msantd4  |
| ENSMUST00000124482.2  | -1.219422851 | MGI:1351608 | Mrpl17   |
| ENSMUST00000084125.9  | -1.208892932 | MGI:2387629 | Tardbp   |
| ENSMUST00000015137.9  | -1.203196435 | MGI:104572  | Limk1    |
| ENSMUST00000057503.6  | -1.203196435 | MGI:1923411 | Lamp5    |
| ENSMUST00000042312.13 | -1.194862069 | MGI:1923551 | Trafd1   |
| ENSMUST00000102735.9  | -1.193664326 | MGI:2150150 | Slc4a10  |
| ENSMUST00000103193.4  | -1.193664326 | MGI:96622   | Itpa     |
| ENSMUST00000223553.1  | -1.191409153 | MGI:97587   | Pim2     |
| ENSMUST00000001304.8  | -1.186318214 | MGI:88407   | Ckb      |
| ENSMUST00000067530.5  | -1.167812375 | MGI:1928744 | Vapb     |
| ENSMUST00000038791.14 | -1.157570585 | MGI:1891827 | Gde1     |
| ENSMUST00000090227.5  | -1.157407879 | MGI:2442773 | Marchf6  |
| ENSMUST00000043966.7  | -1.156407084 | MGI:1921850 | Mrpl47   |
| ENSMUST00000011029.11 | -1.154931211 | MGI:1914963 | Dnajc19  |
| ENSMUST00000017090.5  | -1.154931211 | MGI:1916509 | Kctd5    |
| ENSMUST00000020040.4  | -1.154931211 | MGI:1328351 | Nts      |
| ENSMUST00000022272.13 | -1.154931211 | MGI:1918643 | Kctd6    |
| ENSMUST00000030432.7  | -1.154931211 | MGI:96158   | Hmgcl    |
| ENSMUST00000041558.14 | -1.154931211 | MGI:1276124 | Ep400    |
| ENSMUST00000052529.3  | -1.154931211 | MGI:2444211 | Ppp1r15b |
| ENSMUST00000103194.9  | -1.154931211 | MGI:1096574 | Car4     |
| ENSMUST00000109943.9  | -1.154931211 | MGI:1921552 | Mtmr3    |
| ENSMUST00000119664.1  | -1.154931211 | MGI:1916796 | Mapk1ip1 |
| ENSMUST00000020856.5  | -1.149784132 | MGI:1914162 | Bzw2     |
| ENSMUST00000028222.12 | -1.139171609 | MGI:95835   | Hspa5    |
| ENSMUST00000024887.5  | -1.139139415 | MGI:1920944 | Ndufaf7  |
| ENSMUST00000032362.11 | -1.138903035 | MGI:1889679 | Slco1c1  |
| ENSMUST00000077798.12 | -1.138903035 | MGI:107912  | Ssrp1    |
| ENSMUST00000081591.6  | -1.138903035 | MGI:1919747 | Zc3h15   |
| ENSMUST00000007797.9  | -1.136618121 | MGI:95620   | Gabbr2   |
| ENSMUST00000023189.14 | -1.132214268 | MGI:1921272 | Glyr1    |

|                       |              |             |          |
|-----------------------|--------------|-------------|----------|
| ENSMUST00000015011.9  | -1.129049518 | MGI:98445   | Surf4    |
| ENSMUST00000022296.6  | -1.124039057 | MGI:107411  | Ube2e1   |
| ENSMUST00000013970.8  | -1.122378725 | MGI:2152214 | Pip4k2c  |
| ENSMUST00000022563.8  | -1.122378725 | MGI:2145637 | Mtmr6    |
| ENSMUST00000211115.1  | -1.121857464 | MGI:107739  | Casp3    |
| ENSMUST00000003450.14 | -1.11866456  | MGI:1921601 | Ddx23    |
| ENSMUST00000114989.8  | -1.108049254 | MGI:1859026 | Cnot4    |
| ENSMUST00000237400.1  | -1.104000291 | MGI:1917473 | Nars     |
| ENSMUST00000114516.7  | -1.099782578 | MGI:1917433 | Dzip3    |
| ENSMUST00000102926.4  | -1.094140059 | MGI:1914878 | Anp32b   |
| ENSMUST00000032419.8  | -1.092705364 | MGI:1337124 | Cmas     |
| ENSMUST00000108904.9  | -1.092705364 | MGI:894291  | Acsl6    |
| ENSMUST00000161154.1  | -1.090709216 | MGI:104630  | Wars     |
| ENSMUST00000030361.10 | -1.082487864 | MGI:1929278 | Tmem59   |
| ENSMUST00000026635.7  | -1.073203208 | MGI:2446173 | Farp1    |
| ENSMUST00000114007.7  | -1.073203208 | MGI:1924317 | Cacfd1   |
| ENSMUST00000039534.10 | -1.069651021 | MGI:1098222 | Resp18   |
| ENSMUST00000041725.13 | -1.069651021 | MGI:2143974 | Mgat4b   |
| ENSMUST00000043325.8  | -1.069651021 | MGI:1346049 | Hs2st1   |
| ENSMUST00000022993.6  | -1.066187131 | MGI:1915069 | Der1     |
| ENSMUST00000005810.8  | -1.063801766 | MGI:1338850 | Mthfd2   |
| ENSMUST00000009435.11 | -1.063801766 | MGI:2652132 | Pttg1ip  |
| ENSMUST00000018851.13 | -1.063801766 | MGI:103147  | Dync1h1  |
| ENSMUST00000022345.6  | -1.063801766 | MGI:1915326 | Dnajc9   |
| ENSMUST00000024967.13 | -1.063801766 | MGI:101816  | Msh2     |
| ENSMUST00000027404.11 | -1.063801766 | MGI:102765  | Ptprn    |
| ENSMUST00000029752.14 | -1.063801766 | MGI:1919057 | Tars2    |
| ENSMUST00000034227.5  | -1.063801766 | MGI:1915051 | Pllp     |
| ENSMUST00000037360.7  | -1.063801766 | MGI:2444227 | Rhov     |
| ENSMUST00000049503.9  | -1.063801766 | MGI:1926048 | Eml4     |
| ENSMUST00000051605.8  | -1.063801766 | MGI:1346051 | Dut      |
| ENSMUST00000054399.5  | -1.063801766 | MGI:1349481 | Ing1     |
| ENSMUST00000068031.7  | -1.063801766 | MGI:98790   | Top2a    |
| ENSMUST00000095938.9  | -1.063801766 | MGI:2141510 | AI854703 |
| ENSMUST00000114471.2  | -1.063801766 | MGI:2146430 | Cblb     |
| ENSMUST00000115661.4  | -1.063801766 | MGI:5649001 | Gm42416  |
| ENSMUST00000207505.1  | -1.063801766 | MGI:5011595 | Gm19410  |
| ENSMUST00000107237.7  | -1.063557736 | MGI:1201670 | Psmd4    |
| ENSMUST00000029727.7  | -1.058014129 | MGI:1354695 | Fbxw7    |

|                       |              |             |         |
|-----------------------|--------------|-------------|---------|
| ENSMUST00000071816.6  | -1.057507763 | MGI:88259   | Camk2g  |
| ENSMUST00000056882.6  | -1.051723684 | MGI:1355334 | Olig1   |
| ENSMUST00000004378.14 | -1.048280338 | MGI:95394   | Eno2    |
| ENSMUST00000013766.12 | -1.045886895 | MGI:1918918 | Atraid  |
| ENSMUST00000027111.14 | -1.038031395 | MGI:2443241 | Ndufs1  |
| ENSMUST00000219993.1  | -1.038031395 | MGI:1917754 | Galnt16 |
| ENSMUST00000019616.5  | -1.026625868 | MGI:109430  | Icam5   |
| ENSMUST00000021514.9  | -1.026625868 | MGI:99878   | Ppm1a   |
| ENSMUST00000072186.11 | -1.026625868 | MGI:104626  | Strbp   |
| ENSMUST00000028926.12 | -1.022088162 | MGI:104562  | Napb    |
| ENSMUST00000021018.10 | -1.018494938 | MGI:1917689 | Taf15   |
| ENSMUST00000006254.5  | -1.015107747 | MGI:1913661 | Tbc1d   |
| ENSMUST00000020118.4  | -1.015107747 | MGI:1914853 | Dusp6   |
| ENSMUST00000165443.3  | -1.015107747 | MGI:1351502 | Nup50   |
| ENSMUST00000043584.4  | -1.014669765 | MGI:1915472 | Tubb4b  |
| ENSMUST00000005606.7  | -1.011281752 | MGI:97592   | Prkaca  |
| ENSMUST00000048016.2  | -1.0084265   | MGI:1920318 | Fut11   |
| ENSMUST00000109381.8  | -1.0084265   | MGI:1924161 | Brd1    |
| ENSMUST00000051431.9  | -1.006181162 | MGI:1261890 | Fbxo28  |
| ENSMUST00000115567.7  | -1.006181162 | MGI:95824   | Nr3c1   |
| ENSMUST00000026576.4  | -1.003957103 | MGI:1274789 | Taldo1  |
| ENSMUST00000072740.12 | -0.999059803 | MGI:107771  | Abr     |
| ENSMUST00000040518.5  | -0.997057927 | MGI:2386251 | Eif3l   |
| ENSMUST00000029116.13 | -0.996906428 | MGI:1923927 | Pcmdt2  |
| ENSMUST00000114763.2  | -0.988538721 | MGI:102793  | Fstl1   |
| ENSMUST00000166734.9  | -0.985342838 | MGI:1923749 | Clasp2  |
| ENSMUST00000023444.10 | -0.982185085 | MGI:1914113 | Lztr1   |
| ENSMUST00000086978.11 | -0.982185085 | MGI:1858227 | Cdkl2   |
| ENSMUST00000031004.10 | -0.977800315 | MGI:107793  | Crmp1   |
| ENSMUST00000103017.3  | -0.973175507 | MGI:2679787 | Nploc4  |
| ENSMUST00000002840.8  | -0.967093505 | MGI:2385054 | Pex6    |
| ENSMUST00000030381.7  | -0.967093505 | MGI:1858304 | Ctps    |
| ENSMUST00000030731.10 | -0.96652558  | MGI:1913714 | Taf12   |
| ENSMUST00000037141.8  | -0.96652558  | MGI:1920501 | Setd7   |
| ENSMUST00000046463.9  | -0.96652558  | MGI:109443  | Gtpbp1  |
| ENSMUST00000055125.4  | -0.96652558  | MGI:2183442 | Diras1  |
| ENSMUST00000065111.14 | -0.96652558  | MGI:101850  | Usp45   |
| ENSMUST00000070173.8  | -0.96652558  | MGI:1913772 | Pgpep1  |
| ENSMUST00000071703.5  | -0.96652558  | MGI:2387179 | Tut7    |

|                       |              |             |         |
|-----------------------|--------------|-------------|---------|
| ENSMUST00000087333.8  | -0.96652558  | MGI:2148020 | Tmem164 |
| ENSMUST00000103006.3  | -0.96652558  | MGI:2147931 | Nudt10  |
| ENSMUST00000108023.9  | -0.96652558  | MGI:88316   | Ccne1   |
| ENSMUST00000108702.7  | -0.96652558  | MGI:97631   | Pmp22   |
| ENSMUST00000105447.10 | -0.962711544 | MGI:1353654 | Vps26a  |
| ENSMUST00000051454.3  | -0.96115085  | MGI:2444579 | Fam171b |
| ENSMUST00000095737.4  | -0.96115085  | MGI:3050566 | Akap6   |
| ENSMUST00000103079.3  | -0.96115085  | MGI:99695   | Ctnn    |
| ENSMUST00000109608.8  | -0.96115085  | MGI:2386621 | Cpne1   |
| ENSMUST00000077290.8  | -0.960949875 | MGI:104864  | Pdia4   |
| ENSMUST00000037299.14 | -0.957373854 | MGI:1917431 | Ythdf1  |
| ENSMUST00000069041.14 | -0.957373854 | MGI:1889383 | Ap1s2   |
| ENSMUST00000106391.7  | -0.95457434  | MGI:1915013 | Prpsap1 |
| ENSMUST00000118466.7  | -0.95457434  | MGI:1917814 | Prxl2a  |
| ENSMUST00000191471.6  | -0.95457434  | MGI:1915671 | Lmbrd1  |
| ENSMUST00000179353.7  | -0.952416323 | MGI:97298   | Septin2 |
| ENSMUST00000179353.7  | -0.952416323 | MGI:97298   | Septin2 |
| ENSMUST00000179353.7  | -0.952416323 | MGI:97298   | Septin2 |
| ENSMUST00000023509.4  | -0.949307222 | MGI:1923035 | Klhl24  |
| ENSMUST00000014370.10 | -0.948908186 | MGI:1270839 | Cacybp  |
| ENSMUST00000058109.8  | -0.947175199 | MGI:1354367 | Mrps7   |
| ENSMUST00000057921.9  | -0.930782783 | MGI:99595   | Arf2    |
| ENSMUST00000031445.4  | -0.928520642 | MGI:1926144 | Aacs    |
| ENSMUST00000114874.4  | -0.927926314 | MGI:2141402 | Clec2l  |
| ENSMUST00000045692.8  | -0.926386156 | MGI:2448488 | Fbxl16  |
| ENSMUST00000018274.9  | -0.925363452 | MGI:1355272 | Csnk1d  |
| ENSMUST00000060991.5  | -0.925363452 | MGI:1914375 | Tspan31 |
| ENSMUST00000167201.1  | -0.925363452 | MGI:1929266 | Snd1    |
| ENSMUST00000021201.5  | -0.924089623 | MGI:107265  | Cpd     |
| ENSMUST00000165307.7  | -0.922459226 | MGI:1913721 | Anp32e  |
| ENSMUST00000030626.11 | -0.922086054 | MGI:1919067 | Tmem50a |
| ENSMUST00000035105.6  | -0.920298178 | MGI:105381  | Rpsa    |
| ENSMUST00000022808.13 | -0.917297054 | MGI:1859158 | Pabpn1  |
| ENSMUST00000030110.14 | -0.917297054 | MGI:1915518 | Zdhhc21 |
| ENSMUST00000044166.8  | -0.917297054 | MGI:1918963 | Cdc40   |
| ENSMUST00000075444.7  | -0.917297054 | MGI:108101  | Ddn     |
| ENSMUST00000162819.8  | -0.917297054 | MGI:1923825 | Wdr26   |
| ENSMUST00000217198.1  | -0.917297054 | MGI:3045350 | Olfm2   |

|                       |              |             |          |
|-----------------------|--------------|-------------|----------|
| ENSMUST00000059229.15 | -0.91664403  | MGI:1919792 | Pgam5    |
| ENSMUST00000004134.10 | -0.914090298 | MGI:1309466 | Gstm5    |
| ENSMUST00000175858.8  | -0.91270999  | MGI:1920590 | Nptxr    |
| ENSMUST00000026222.10 | -0.906917632 | MGI:1914514 | Ndufb8   |
| ENSMUST00000059339.5  | -0.900666848 | MGI:105308  | Pnoc     |
| ENSMUST00000019229.14 | -0.896570013 | MGI:1915269 | Med8     |
| ENSMUST00000033763.14 | -0.896570013 | MGI:1915255 | Naa10    |
| ENSMUST00000042052.8  | -0.896570013 | MGI:2384768 | Hectd1   |
| ENSMUST00000026156.7  | -0.891389378 | MGI:894275  | Rfng     |
| ENSMUST00000053355.5  | -0.891389378 | MGI:1928333 | Creg2    |
| ENSMUST00000088744.11 | -0.891389378 | MGI:1340046 | Adam22   |
| ENSMUST00000021595.9  | -0.887666042 | MGI:106054  | Psmc1    |
| ENSMUST00000199300.4  | -0.886428876 | MGI:1341265 | Camk2d   |
| ENSMUST00000166972.8  | -0.88496027  | MGI:101921  | Ap2a1    |
| ENSMUST00000034689.7  | -0.882713849 | MGI:1346036 | Pin1     |
| ENSMUST00000033720.11 | -0.882396648 | MGI:1194910 | Rbbp7    |
| ENSMUST00000074371.12 | -0.882195093 | MGI:107490  | Pdcd4    |
| ENSMUST00000036033.13 | -0.879029382 | MGI:2385920 | Dip2a    |
| ENSMUST00000022009.9  | -0.877376241 | MGI:1097706 | Cetn3    |
| ENSMUST00000071555.12 | -0.876986512 | MGI:87906   | Actg1    |
| ENSMUST00000027503.13 | -0.876405495 | MGI:108396  | Dtymk    |
| ENSMUST00000048934.14 | -0.875437291 | MGI:107404  | Tbr1     |
| ENSMUST00000062058.4  | -0.875437291 | MGI:3036267 | Lix1l    |
| ENSMUST00000066983.12 | -0.875437291 | MGI:2442422 | Abhd10   |
| ENSMUST00000075190.4  | -0.875437291 | MGI:99217   | Cdh11    |
| ENSMUST00000077672.11 | -0.875437291 | MGI:1915268 | Col4a3bp |
| ENSMUST00000105439.1  | -0.875437291 | MGI:2389177 | Lrrtm3   |
| ENSMUST00000203619.2  | -0.875437291 | MGI:99534   | Cntn3    |
| ENSMUST00000030637.13 | -0.874794563 | MGI:1347351 | Ncdn     |
| ENSMUST00000029770.7  | -0.871598614 | MGI:1349216 | Abcd3    |
| ENSMUST00000015950.11 | -0.869876106 | MGI:97836   | Qdpr     |
| ENSMUST00000096057.4  | -0.868897992 | MGI:1926784 | Tagln3   |
| ENSMUST00000023489.10 | -0.864564567 | MGI:1917955 | Fyttd1   |
| ENSMUST00000018315.9  | -0.863556217 | MGI:1923159 | Vmp1     |
| ENSMUST00000030296.8  | -0.863556217 | MGI:1913323 | Txndc12  |
| ENSMUST00000047714.13 | -0.863556217 | MGI:1922855 | Kdm5b    |
| ENSMUST00000078945.11 | -0.863556217 | MGI:106479  | Grsf1    |
| ENSMUST00000006037.12 | -0.862213087 | MGI:1276533 | Ncoa2    |
| ENSMUST00000009102.8  | -0.862213087 | MGI:1202305 | Vps72    |

|                       |              |             |           |
|-----------------------|--------------|-------------|-----------|
| ENSMUST00000018212.12 | -0.862213087 | MGI:1917672 | Ints2     |
| ENSMUST00000028389.3  | -0.862213087 | MGI:892032  | Frzb      |
| ENSMUST00000029316.15 | -0.862213087 | MGI:1916889 | Exosc8    |
| ENSMUST00000029588.9  | -0.862213087 | MGI:107634  | Larp7     |
| ENSMUST00000030311.10 | -0.862213087 | MGI:1914944 | Ift74     |
| ENSMUST00000034981.13 | -0.862213087 | MGI:891964  | Xrn1      |
| ENSMUST00000035264.8  | -0.862213087 | MGI:1920334 | Pak7      |
| ENSMUST00000037709.15 | -0.862213087 | MGI:1914873 | Tm7sf3    |
| ENSMUST00000038665.5  | -0.862213087 | MGI:2685233 | Ptchd1    |
| ENSMUST00000039812.15 | -0.862213087 | MGI:3041170 | Zmym5     |
| ENSMUST00000040986.14 | -0.862213087 | MGI:1915160 | Rubcn     |
| ENSMUST00000045243.14 | -0.862213087 | MGI:1891434 | Pde4dip   |
| ENSMUST00000053855.7  | -0.862213087 | MGI:1920534 | Ddit4l    |
| ENSMUST00000057495.9  | -0.862213087 | MGI:1919995 | Tmem161b  |
| ENSMUST00000064314.9  | -0.862213087 | MGI:1928379 | Asna1     |
| ENSMUST00000065537.8  | -0.862213087 | MGI:1913096 | Jmy       |
| ENSMUST00000102994.9  | -0.862213087 | MGI:1914740 | Ufl1      |
| ENSMUST00000103084.3  | -0.862213087 | MGI:2388656 | Zfp334    |
| ENSMUST00000110855.7  | -0.862213087 | MGI:2446186 | Lpgat1    |
| ENSMUST00000126319.7  | -0.862213087 | MGI:2384863 | Tbl3      |
| ENSMUST00000192511.1  | -0.862213087 | MGI:1935219 | Pcdhga7   |
| ENSMUST00000222435.1  | -0.862213087 | MGI:3779109 | Ftl1-ps1  |
| ENSMUST00000237602.1  | -0.862213087 | MGI:1926421 | Tcerg1    |
| ENSMUST00000010007.8  | -0.86069199  | MGI:1914930 | Sdhb      |
| ENSMUST00000004054.12 | -0.857198439 | MGI:103560  | Kpna1     |
| ENSMUST00000028683.13 | -0.85649581  | MGI:95834   | Pdia3     |
| ENSMUST00000021532.5  | -0.85578876  | MGI:1922877 | Snapc1    |
| ENSMUST00000026750.14 | -0.853207212 | MGI:2661175 | Cnksr2    |
| ENSMUST00000043484.7  | -0.853207212 | MGI:2385070 | Reep2     |
| ENSMUST00000033189.5  | -0.848833881 | MGI:99479   | Cckbr     |
| ENSMUST00000200659.1  | -0.848833881 | MGI:5663875 | Gm43738   |
| ENSMUST00000006435.7  | -0.842285373 | MGI:109618  | Atp6v1b2  |
| ENSMUST00000052332.14 | -0.841728481 | MGI:106913  | Abi2      |
| ENSMUST00000032497.6  | -0.839392718 | MGI:107893  | D6Wsu163e |
| ENSMUST00000058496.7  | -0.839392718 | MGI:1914490 | Taok1     |
| ENSMUST00000089559.10 | -0.839392718 | MGI:1924256 | Ddrgk1    |
| ENSMUST00000103140.4  | -0.839392718 | MGI:1930751 | Trpc4ap   |
| ENSMUST00000112636.7  | -0.839392718 | MGI:2139447 | Galnt13   |
| ENSMUST00000113403.7  | -0.839392718 | MGI:99654   | Epha5     |



|                       |              |             |          |
|-----------------------|--------------|-------------|----------|
| ENSMUST00000033036.6  | -0.838474551 | MGI:1354952 | Dkk3     |
| ENSMUST00000034051.6  | -0.838474551 | MGI:1913679 | Ufsp2    |
| ENSMUST00000057288.5  | -0.837966838 | MGI:1919103 | Pdia6    |
| ENSMUST00000113677.2  | -0.837966838 | MGI:2442511 | Zer1     |
| ENSMUST00000062045.3  | -0.834757749 | MGI:1931527 | H1f4     |
| ENSMUST00000027131.5  | -0.83070291  | MGI:1914515 | Slc39a10 |
| ENSMUST00000091064.7  | -0.83070291  | MGI:1915691 | Rraga    |
| ENSMUST00000060500.8  | -0.827993201 | MGI:1933735 | Eif5a2   |
| ENSMUST00000239150.1  | -0.827993201 | MGI:98970   | Xbp1     |
| ENSMUST00000035220.11 | -0.825309882 | MGI:108025  | Prkar2a  |
| ENSMUST00000074127.13 | -0.825309882 | MGI:1353452 | Aldh3a2  |
| ENSMUST00000107172.7  | -0.825309882 | MGI:1919599 | Dusp3    |
| ENSMUST00000118557.7  | -0.825309882 | MGI:1338882 | Pex11b   |
| ENSMUST00000030117.4  | -0.822997622 | MGI:1915546 | Smu1     |
| ENSMUST00000034612.6  | -0.822997622 | MGI:1353582 | Ddx25    |
| ENSMUST00000001818.4  | -0.820020868 | MGI:1914127 | Crnkl1   |
| ENSMUST00000003320.13 | -0.820020868 | MGI:2446176 | Eif2b5   |
| ENSMUST00000037337.9  | -0.820020868 | MGI:1914499 | Tbc1d19  |
| ENSMUST00000089250.8  | -0.820020868 | MGI:104908  | Ptk2b    |
| ENSMUST00000102801.7  | -0.820020868 | MGI:1345184 | Tenm2    |
| ENSMUST00000066469.13 | -0.818819963 | MGI:1891702 | Cope     |
| ENSMUST00000048112.12 | -0.815752303 | MGI:107320  | Sgsm1    |
| ENSMUST00000236085.1  | -0.814071614 | MGI:1929601 | Ndfip1   |
| ENSMUST00000041623.8  | -0.811670045 | MGI:109610  | Enc1     |
| ENSMUST00000114297.4  | -0.809213343 | MGI:2141658 | Vopp1    |
| ENSMUST00000095664.5  | -0.808840609 | MGI:2684999 | Tmf1     |
| ENSMUST00000019722.11 | -0.808021011 | MGI:1913780 | Ubxn6    |
| ENSMUST00000022765.13 | -0.803609621 | MGI:1923588 | Rab2b    |
| ENSMUST00000005923.6  | -0.803531617 | MGI:1098257 | Psemb4   |
| ENSMUST00000049285.9  | -0.801939676 | MGI:106038  | Lrrn1    |
| ENSMUST00000109594.7  | -0.801939676 | MGI:2135601 | Slc1a4   |
| ENSMUST00000025546.16 | -0.800371254 | MGI:1913304 | Cndp2    |
| ENSMUST00000030734.4  | -0.800371254 | MGI:1922312 | Sf3a3    |
| ENSMUST00000001836.10 | -0.799512727 | MGI:1914735 | Pwp1     |
| ENSMUST00000080210.9  | -0.798725126 | MGI:101931  | Slc1a2   |
| ENSMUST00000003759.10 | -0.796217173 | MGI:1346998 | Ciao1    |
| ENSMUST00000029780.11 | -0.796217173 | MGI:1860489 | Ptbp2    |
| ENSMUST00000023225.7  | -0.79548633  | MGI:1913418 | Grina    |
| ENSMUST00000036381.9  | -0.795069043 | MGI:1913922 | Chmp7    |

|                       |              |             |           |
|-----------------------|--------------|-------------|-----------|
| ENSMUST00000120638.7  | -0.791177487 | MGI:1351334 | Syn3      |
| ENSMUST00000009538.11 | -0.785847687 | MGI:103020  | Syn2      |
| ENSMUST00000025218.7  | -0.784307845 | MGI:2385071 | Etf1      |
| ENSMUST00000032335.12 | -0.784307845 | MGI:1858965 | Atf7ip    |
| ENSMUST00000087654.4  | -0.784307845 | MGI:1920701 | Zfp763    |
| ENSMUST00000094331.4  | -0.784307845 | MGI:1913897 | Nsmce3    |
| ENSMUST00000110534.7  | -0.784307845 | MGI:2137512 | Arid4b    |
| ENSMUST00000111742.7  | -0.784307845 | MGI:104861  | Bcat1     |
| ENSMUST00000121369.7  | -0.784307845 | MGI:2442859 | Rnft2     |
| ENSMUST00000156249.1  | -0.784307845 | MGI:98889   | Ubc       |
| ENSMUST00000004202.16 | -0.780462619 | MGI:94912   | Dnmt1     |
| ENSMUST00000007803.11 | -0.780462619 | MGI:88139   | Bcl2l1    |
| ENSMUST00000058265.7  | -0.780462619 | MGI:1913493 | C1galt1c1 |
| ENSMUST00000164930.7  | -0.780462619 | MGI:97178   | Map4      |
| ENSMUST00000216063.1  | -0.780462619 | MGI:2143340 | Zfp445    |
| ENSMUST00000004050.6  | -0.778947905 | MGI:1914718 | Mmd       |
| ENSMUST00000039894.12 | -0.777941145 | MGI:1917680 | Tbce      |
| ENSMUST00000049093.7  | -0.777941145 | MGI:1889549 | Txnip     |
| ENSMUST00000020754.9  | -0.776160234 | MGI:1913994 | Cfap36    |
| ENSMUST00000030074.7  | -0.776160234 | MGI:1332243 | Ugcg      |
| ENSMUST00000020886.8  | -0.774835404 | MGI:1929865 | Nampt     |
| ENSMUST00000089770.10 | -0.774835404 | MGI:1923760 | Trappc9   |
| ENSMUST00000182659.7  | -0.774835404 | MGI:1933204 | Rbm5      |
| ENSMUST00000222941.1  | -0.774835404 | MGI:1924730 | Kidins220 |
| ENSMUST00000033915.8  | -0.764492697 | MGI:107671  | Gpm6a     |
| ENSMUST00000027425.15 | -0.763659415 | MGI:1927594 | Itm2c     |
| ENSMUST00000033176.6  | -0.762518144 | MGI:1914253 | Uqcrc2    |
| ENSMUST00000049053.8  | -0.758844838 | MGI:2442372 | Fam168a   |
| ENSMUST00000055242.10 | -0.758805485 | MGI:1927155 | Clptm1    |
| ENSMUST00000146292.7  | -0.757656842 | MGI:2444386 | Tmem63c   |
| ENSMUST00000160289.8  | -0.757656842 | MGI:1915122 | Nsmce4a   |
| ENSMUST00000025477.14 | -0.756057868 | MGI:106019  | St8sia3   |
| ENSMUST00000038163.7  | -0.756057868 | MGI:1918941 | Pnmal1    |
| ENSMUST00000066668.13 | -0.756057868 | MGI:1278328 | Dnpep     |
| ENSMUST00000070533.4  | -0.756057868 | MGI:3528744 | Xkr4      |
| ENSMUST00000110708.3  | -0.756057868 | MGI:3714357 | Srp54b    |
| ENSMUST00000119374.7  | -0.756057868 | MGI:2444830 | Nkain3    |
| ENSMUST00000121469.1  | -0.756057868 | MGI:1098827 | Reep1     |
| ENSMUST00000171649.7  | -0.756057868 | MGI:1298392 | Bscl2     |

|                        |              |             |         |
|------------------------|--------------|-------------|---------|
| ENSMUST00000160835.8   | -0.754002929 | MGI:2448501 | Pip4p1  |
| ENSMUST00000003318.12  | -0.753679158 | MGI:108100  | Dvl3    |
| ENSMUST000000031278.5  | -0.753679158 | MGI:88179   | Bmp3    |
| ENSMUST000000038014.10 | -0.753679158 | MGI:2442146 | Dnajc16 |
| ENSMUST000000046110.15 | -0.753679158 | MGI:1098567 | Astn1   |
| ENSMUST000000055454.13 | -0.753679158 | MGI:1922460 | Prr3    |
| ENSMUST000000071095.13 | -0.753679158 | MGI:1289184 | Setd3   |
| ENSMUST000000087879.10 | -0.753679158 | MGI:2148050 | Nexmif  |
| ENSMUST000000020049.8  | -0.749766444 | MGI:1289302 | Ccdc59  |
| ENSMUST000000020258.9  | -0.749766444 | MGI:1914595 | Herc4   |
| ENSMUST000000020268.6  | -0.749766444 | MGI:1914750 | Ccar1   |
| ENSMUST000000020931.5  | -0.749766444 | MGI:1914491 | Smc6    |
| ENSMUST000000020969.4  | -0.749766444 | MGI:99830   | Cmpk2   |
| ENSMUST000000021285.13 | -0.749766444 | MGI:1890156 | Stx8    |
| ENSMUST000000022709.5  | -0.749766444 | MGI:1345138 | Spry2   |
| ENSMUST000000025702.13 | -0.749766444 | MGI:1916274 | Snx15   |
| ENSMUST000000026831.13 | -0.749766444 | MGI:2384891 | Rhbdl1  |
| ENSMUST000000031607.6  | -0.749766444 | MGI:1352744 | Dtx1    |
| ENSMUST000000032492.8  | -0.749766444 | MGI:88348   | Cd9     |
| ENSMUST000000037923.4  | -0.749766444 | MGI:3610364 | Rbm24   |
| ENSMUST000000050078.12 | -0.749766444 | MGI:108079  | Sdf4    |
| ENSMUST000000061260.7  | -0.749766444 | MGI:3045256 | Fat4    |
| ENSMUST000000065211.8  | -0.749766444 | MGI:1351636 | Srr     |
| ENSMUST000000068387.10 | -0.749766444 | MGI:1276116 | Ep300   |
| ENSMUST000000069098.6  | -0.749766444 | MGI:2444575 | Soga1   |
| ENSMUST000000070864.13 | -0.749766444 | MGI:88296   | Cacna1b |
| ENSMUST000000076383.7  | -0.749766444 | MGI:2144023 | Fbxw11  |
| ENSMUST000000076921.6  | -0.749766444 | MGI:1917567 | Arl16   |
| ENSMUST000000081497.12 | -0.749766444 | MGI:2151221 | Pop5    |
| ENSMUST00000111063.7   | -0.749766444 | MGI:1924265 | Mpped2  |
| ENSMUST00000153488.8   | -0.749766444 | MGI:1922259 | Naa30   |
| ENSMUST00000159645.7   | -0.749766444 | MGI:2445220 | Dcaf1   |
| ENSMUST00000113913.7   | -0.744605958 | MGI:107745  | Dctn1   |
| ENSMUST00000163666.2   | -0.744605958 | MGI:95303   | Eif4a1  |
| ENSMUST00000019911.13  | -0.742933973 | MGI:1097691 | Hdac2   |
| ENSMUST000000052885.13 | -0.739222732 | MGI:2177957 | Tmem259 |
| ENSMUST00000148178.7   | -0.739222732 | MGI:1926465 | Hnrnpm  |
| ENSMUST000000034834.15 | -0.735622498 | MGI:97591   | Pkm     |
| ENSMUST000000065504.16 | -0.735081467 | MGI:88031   | Anxa7   |

|                       |              |             |               |
|-----------------------|--------------|-------------|---------------|
| ENSMUST00000106054.2  | -0.734291759 | MGI:2147627 | Yars          |
| ENSMUST00000018990.7  | -0.732535151 | MGI:2387464 | Pank3         |
| ENSMUST00000021329.13 | -0.732395223 | MGI:1927204 | Gosr2         |
| ENSMUST00000034458.8  | -0.732395223 | MGI:894694  | Galnt2        |
| ENSMUST00000029654.14 | -0.72993658  | MGI:95751   | Glrb          |
| ENSMUST00000165125.7  | -0.728744419 | MGI:1913491 | Tmem9         |
| ENSMUST00000055858.13 | -0.728046053 | MGI:1914226 | 2410002F23Rik |
| ENSMUST00000081111.13 | -0.728046053 | MGI:109367  | Impdh2        |
| ENSMUST00000088392.8  | -0.727115551 | MGI:1201408 | Srpk2         |
| ENSMUST00000111566.8  | -0.727115551 | MGI:1928401 | Clip1         |
| ENSMUST00000163119.7  | -0.727115551 | MGI:1347360 | Cul3          |
| ENSMUST00000165594.3  | -0.727115551 | MGI:1335094 | Septin7       |
| ENSMUST00000019517.9  | -0.725815364 | MGI:1349409 | Cops3         |
| ENSMUST00000229206.1  | -0.724906016 | MGI:96617   | Cd47          |
| ENSMUST00000032398.14 | -0.722395395 | MGI:1277973 | Thumpd3       |
| ENSMUST00000115242.8  | -0.722395395 | MGI:1921590 | Ahcyl2        |
| ENSMUST00000162097.7  | -0.722395395 | MGI:107562  | Arpp21        |
| ENSMUST00000066070.6  | -0.720050125 | MGI:1921080 | Eif3k         |
| ENSMUST00000169032.7  | -0.717807493 | MGI:96413   | Idh1          |
| ENSMUST00000003468.9  | -0.715708376 | MGI:95818   | Grik5         |
| ENSMUST00000021929.9  | -0.715708376 | MGI:1891713 | Habp4         |
| ENSMUST00000024123.8  | -0.715708376 | MGI:2183446 | Agap3         |
| ENSMUST00000133181.1  | -0.715708376 | MGI:1098815 | Cdc23         |
| ENSMUST00000168129.9  | -0.715708376 | MGI:2445089 | Trappc12      |
| ENSMUST00000025027.9  | -0.714756182 | MGI:1914925 | Cuta          |
| ENSMUST00000020027.10 | -0.713758727 | MGI:1926228 | Serinc1       |
| ENSMUST00000025567.8  | -0.713605772 | MGI:1930079 | Fads2         |
| ENSMUST00000043269.13 | -0.711858879 | MGI:99894   | Hnrnpk        |
| ENSMUST00000150727.7  | -0.709499752 | MGI:2384997 | Ube2e2        |
| ENSMUST00000106398.8  | -0.706972518 | MGI:2442484 | Rnf157        |
| ENSMUST00000037205.10 | -0.70416529  | MGI:1920974 | Mcee          |
| ENSMUST00000002529.6  | -0.703854369 | MGI:1922946 | Prpf6         |
| ENSMUST00000003550.10 | -0.703854369 | MGI:1891700 | Ncstn         |
| ENSMUST00000045153.10 | -0.703854369 | MGI:1917016 | Pik3ip1       |
| ENSMUST00000100467.9  | -0.703854369 | MGI:2153272 | Trrap         |
| ENSMUST00000109315.4  | -0.703854369 | MGI:1923055 | Nln           |
| ENSMUST00000109869.1  | -0.703854369 | MGI:1346072 | Psmf1         |
| ENSMUST00000127638.7  | -0.703854369 | MGI:103038  | Stat3         |
| ENSMUST00000039697.13 | -0.702780518 | MGI:95621   | Gabrb3        |

|                       |              |             |          |
|-----------------------|--------------|-------------|----------|
| ENSMUST00000007865.6  | -0.701620352 | MGI:1916403 | Ccdc124  |
| ENSMUST00000033331.6  | -0.701620352 | MGI:1925843 | Nrip3    |
| ENSMUST00000044556.11 | -0.701620352 | MGI:2385326 | Tbc1d13  |
| ENSMUST00000111338.9  | -0.700737249 | MGI:1923036 | Ckap5    |
| ENSMUST00000115663.9  | -0.700737249 | MGI:1345297 | Slc35a2  |
| ENSMUST00000015620.6  | -0.697714231 | MGI:1932118 | Prprt1   |
| ENSMUST00000013304.7  | -0.697503255 | MGI:1201778 | Atp6v0d1 |
| ENSMUST00000023449.10 | -0.697123435 | MGI:1914724 | Snap29   |
| ENSMUST00000032399.11 | -0.697123435 | MGI:96680   | Kras     |
| ENSMUST00000089950.10 | -0.697123435 | MGI:99537   | Rabggtb  |
| ENSMUST00000073822.5  | -0.694734704 | MGI:97397   | Opcml    |
| ENSMUST00000026125.2  | -0.692784532 | MGI:1341044 | Alyref   |
| ENSMUST00000113979.9  | -0.692784532 | MGI:1336997 | Lancl1   |
| ENSMUST00000026459.5  | -0.692753183 | MGI:107801  | Atp5b    |
| ENSMUST00000017920.13 | -0.692394571 | MGI:88508   | Crk      |
| ENSMUST00000235196.1  | -0.690731482 | MGI:95588   | Fth1     |
| ENSMUST00000000804.6  | -0.690501802 | MGI:103064  | Ddx3x    |
| ENSMUST00000029005.3  | -0.690501802 | MGI:1913654 | Rtf2     |
| ENSMUST00000120389.7  | -0.689754922 | MGI:1919331 | Snx12    |
| ENSMUST00000003386.6  | -0.687031659 | MGI:2137210 | Mrpl4    |
| ENSMUST00000020315.12 | -0.687031659 | MGI:1261820 | Cand1    |
| ENSMUST00000024657.11 | -0.687031659 | MGI:1919307 | Phf10    |
| ENSMUST00000032728.8  | -0.687031659 | MGI:2444486 | Tarsl2   |
| ENSMUST00000039956.5  | -0.687031659 | MGI:2442940 | Slc41a2  |
| ENSMUST00000040336.11 | -0.687031659 | MGI:1920352 | Slc22a23 |
| ENSMUST00000049784.16 | -0.687031659 | MGI:1100511 | Myt1l    |
| ENSMUST00000056889.14 | -0.687031659 | MGI:1344380 | Chd4     |
| ENSMUST00000114415.9  | -0.687031659 | MGI:2679336 | Satb2    |
| ENSMUST00000026551.14 | -0.685802544 | MGI:1349764 | Dpysl4   |
| ENSMUST00000028826.3  | -0.685802544 | MGI:88395   | Chgb     |
| ENSMUST00000000430.13 | -0.683313275 | MGI:894693  | Galnt1   |
| ENSMUST00000045738.4  | -0.683313275 | MGI:1194488 | Slc32a1  |
| ENSMUST00000052725.14 | -0.683313275 | MGI:1353611 | Sc5d     |
| ENSMUST00000161241.7  | -0.683313275 | MGI:99542   | Usf1     |
| ENSMUST00000210656.1  | -0.682423249 | MGI:1929214 | Ap3m2    |
| ENSMUST00000039568.10 | -0.681127271 | MGI:1306800 | Pcdh8    |
| ENSMUST00000045262.10 | -0.681127271 | MGI:2677491 | Ak5      |
| ENSMUST00000100219.4  | -0.681127271 | MGI:2677836 | Dolk     |
| ENSMUST00000165315.7  | -0.681127271 | MGI:2155664 | Snx14    |

|                       |              |             |         |
|-----------------------|--------------|-------------|---------|
| ENSMUST00000016401.14 | -0.679688222 | MGI:1913640 | Preli3b |
| ENSMUST00000021930.9  | -0.679688222 | MGI:2137677 | Sfxn1   |
| ENSMUST00000174850.7  | -0.679688222 | MGI:106582  | Rfx3    |
| ENSMUST00000079205.13 | -0.678669144 | MGI:106576  | Chpf    |
| ENSMUST00000105363.7  | -0.678669144 | MGI:1098221 | Gamt    |
| ENSMUST00000002735.8  | -0.677909601 | MGI:1858213 | Clpp    |
| ENSMUST00000066819.10 | -0.675456467 | MGI:3036236 | Tceal5  |
| ENSMUST00000094934.10 | -0.668834987 | MGI:95632   | Gad1    |
| ENSMUST00000010239.5  | -0.667561777 | MGI:96955   | Slc3a2  |
| ENSMUST00000054442.10 | -0.667561777 | MGI:1915018 | N6amt1  |
| ENSMUST00000037290.11 | -0.666549084 | MGI:1345633 | Mars1   |
| ENSMUST00000069712.8  | -0.666549084 | MGI:1913564 | Tpd52l2 |
| ENSMUST00000122424.7  | -0.665039745 | MGI:2443990 | Fam20b  |
| ENSMUST00000038775.5  | -0.66455097  | MGI:97290   | Ndn     |
| ENSMUST00000027297.10 | -0.664300621 | MGI:2385825 | Plekhb2 |
| ENSMUST00000061071.12 | -0.664300621 | MGI:106530  | Plppr4  |
| ENSMUST00000006559.13 | -0.662549713 | MGI:1341264 | Tpbg    |
| ENSMUST00000014892.7  | -0.662549713 | MGI:1096575 | Tex261  |
| ENSMUST00000033498.9  | -0.662549713 | MGI:1343176 | Timm17b |
| ENSMUST00000040430.7  | -0.662549713 | MGI:1349450 | Vat1    |
| ENSMUST00000060311.11 | -0.662549713 | MGI:1099804 | Hip1    |
| ENSMUST00000069324.6  | -0.662549713 | MGI:1916242 | Zfp580  |
| ENSMUST00000069837.3  | -0.662549713 | MGI:1315202 | Slit3   |
| ENSMUST00000080975.5  | -0.662549713 | MGI:1924301 | Os9     |
| ENSMUST00000034848.13 | -0.661590631 | MGI:1347060 | Psma4   |
| ENSMUST00000000349.10 | -0.65854704  | MGI:105386  | Dbt     |
| ENSMUST00000075069.10 | -0.657478273 | MGI:2446259 | Ntm     |
| ENSMUST00000030158.10 | -0.65428217  | MGI:1859251 | Dctn3   |
| ENSMUST00000170489.1  | -0.65428217  | MGI:104976  | Ddx6    |
| ENSMUST00000020653.5  | -0.649322517 | MGI:1913647 | Sar1b   |
| ENSMUST00000022511.9  | -0.648676687 | MGI:1923257 | Zmym2   |
| ENSMUST00000026254.13 | -0.648676687 | MGI:1861607 | Gbf1    |
| ENSMUST00000030849.12 | -0.648676687 | MGI:2149839 | Fam126a |
| ENSMUST00000033430.2  | -0.648676687 | MGI:109493  | Rab33a  |
| ENSMUST00000038552.12 | -0.648676687 | MGI:1926135 | Coro7   |
| ENSMUST00000114261.8  | -0.648676687 | MGI:2442831 | Paxx    |
| ENSMUST00000136342.8  | -0.648676687 | MGI:1858303 | Srrm1   |
| ENSMUST00000238930.1  | -0.648676687 | MGI:3045495 | Tmem205 |
| ENSMUST00000000608.7  | -0.648251167 | MGI:95762   | Gm2a    |

|                       |              |             |          |
|-----------------------|--------------|-------------|----------|
| ENSMUST00000097281.3  | -0.64581586  | MGI:2444098 | Heatr5b  |
| ENSMUST00000025036.10 | -0.644409427 | MGI:2442355 | Kdm4b    |
| ENSMUST00000005671.9  | -0.641401992 | MGI:96433   | Igf1r    |
| ENSMUST00000029490.14 | -0.641401992 | MGI:2385184 | Ahcyl1   |
| ENSMUST00000053024.7  | -0.641401992 | MGI:1914328 | Pgp      |
| ENSMUST00000076265.12 | -0.641401992 | MGI:1915384 | Upf3b    |
| ENSMUST00000103120.4  | -0.641401992 | MGI:88437   | Cnp      |
| ENSMUST00000109514.7  | -0.641401992 | MGI:106190  | Bcl11a   |
| ENSMUST00000164744.7  | -0.641401992 | MGI:1341217 | Uba3     |
| ENSMUST00000033276.10 | -0.640951565 | MGI:98917   | Uros     |
| ENSMUST00000047463.14 | -0.640951565 | MGI:2144423 | Arhgap44 |
| ENSMUST00000154132.7  | -0.640951565 | MGI:1913451 | Vta1     |
| ENSMUST00000199754.4  | -0.640951565 | MGI:2443225 | Gatad2b  |
| ENSMUST00000099353.5  | -0.640653348 | MGI:1915038 | Sfr1     |
| ENSMUST00000047534.11 | -0.638259853 | MGI:2448487 | Fam168b  |
| ENSMUST00000109734.7  | -0.638143502 | MGI:109486  | Prdx2    |
| ENSMUST00000102758.7  | -0.638099112 | MGI:106919  | Vdac1    |
| ENSMUST00000020312.12 | -0.63708311  | MGI:3026965 | Mcu      |
| ENSMUST00000034904.13 | -0.636028843 | MGI:1916051 | Elovl5   |
| ENSMUST00000059539.4  | -0.635362348 | MGI:1923555 | Nap1l5   |
| ENSMUST00000069064.6  | -0.633938473 | MGI:1916351 | Ydjc     |
| ENSMUST00000021063.12 | -0.63181376  | MGI:1914247 | Psmd12   |
| ENSMUST00000029266.13 | -0.629653098 | MGI:106008  | Anxa5    |
| ENSMUST00000159283.7  | -0.629653098 | MGI:1922090 | Manf     |
| ENSMUST00000005503.4  | -0.627808962 | MGI:1343961 | Msh6     |
| ENSMUST00000010434.7  | -0.627808962 | MGI:2138299 | AI597479 |
| ENSMUST00000014221.12 | -0.627808962 | MGI:1927185 | Chp1     |
| ENSMUST00000020826.5  | -0.627808962 | MGI:1354709 | Sap30l   |
| ENSMUST00000023029.14 | -0.627808962 | MGI:2443584 | L3mbtl2  |
| ENSMUST00000024869.7  | -0.627808962 | MGI:1858896 | Spast    |
| ENSMUST00000026410.1  | -0.627808962 | MGI:1921580 | Dnajc14  |
| ENSMUST00000030189.13 | -0.627808962 | MGI:2654325 | Gba2     |
| ENSMUST00000031170.9  | -0.627808962 | MGI:99700   | Cenpc1   |
| ENSMUST00000035899.7  | -0.627808962 | MGI:2178598 | Bloc1s5  |
| ENSMUST00000037484.14 | -0.627808962 | MGI:1922075 | Senp6    |
| ENSMUST00000040561.5  | -0.627808962 | MGI:2144506 | Rundc1   |
| ENSMUST00000041364.12 | -0.627808962 | MGI:1922666 | Nop14    |
| ENSMUST00000043983.10 | -0.627808962 | MGI:1926158 | Igsf3    |
| ENSMUST00000044053.12 | -0.627808962 | MGI:1917581 | Shprh    |

|                       |              |             |          |
|-----------------------|--------------|-------------|----------|
| ENSMUST00000050556.10 | -0.627808962 | MGI:2444804 | Bod1l    |
| ENSMUST00000053177.13 | -0.627808962 | MGI:1096875 | Wdfy3    |
| ENSMUST00000058060.13 | -0.627808962 | MGI:1916806 | Bod1     |
| ENSMUST00000072835.6  | -0.627808962 | MGI:1918800 | Ccdc112  |
| ENSMUST00000102911.9  | -0.627808962 | MGI:2140592 | Slc44a1  |
| ENSMUST00000102929.1  | -0.627808962 | MGI:2140279 | Tdrd7    |
| ENSMUST00000105831.8  | -0.627808962 | MGI:1923935 | Eif4g3   |
| ENSMUST00000108075.8  | -0.627808962 | MGI:2144475 | Usp32    |
| ENSMUST00000116273.8  | -0.627808962 | MGI:1196256 | Kdm1a    |
| ENSMUST00000122421.1  | -0.627808962 | MGI:1920670 | Ccsap    |
| ENSMUST00000161046.8  | -0.627808962 | MGI:2182061 | Usp7     |
| ENSMUST00000166489.7  | -0.627808962 | MGI:2153608 | Ube2j2   |
| ENSMUST00000171165.7  | -0.627808962 | MGI:1915171 | Ube2f    |
| ENSMUST00000171337.9  | -0.627808962 | MGI:1924574 | Sorbs2   |
| ENSMUST00000177768.2  | -0.627808962 | MGI:1920635 | Fam177a  |
| ENSMUST00000178092.1  | -0.627808962 | MGI:97365   | Pnp      |
| ENSMUST00000178098.7  | -0.627808962 | MGI:2150386 | Dcun1d1  |
| ENSMUST00000187510.6  | -0.627808962 | MGI:88398   | Chrm3    |
| ENSMUST00000031419.5  | -0.626872202 | MGI:1916198 | Fam216a  |
| ENSMUST00000046777.10 | -0.626872202 | MGI:1921166 | Ift57    |
| ENSMUST00000184322.7  | -0.626872202 | MGI:1916892 | Mlip     |
| ENSMUST00000017620.9  | -0.622948909 | MGI:1923275 | Cant1    |
| ENSMUST00000021046.5  | -0.622948909 | MGI:1919297 | Ddx42    |
| ENSMUST00000040182.12 | -0.622948909 | MGI:1925177 | Ccdc88a  |
| ENSMUST00000052266.14 | -0.622948909 | MGI:1096376 | Exoc4    |
| ENSMUST00000053663.10 | -0.622948909 | MGI:1917819 | Wdr36    |
| ENSMUST00000085715.6  | -0.622948909 | MGI:1920955 | Mark4    |
| ENSMUST00000110909.8  | -0.622948909 | MGI:1860493 | Arhgef7  |
| ENSMUST00000207484.1  | -0.622948909 | MGI:2385902 | Picalm   |
| ENSMUST00000042235.14 | -0.622366621 | MGI:1096881 | Eef1a1   |
| ENSMUST00000058667.14 | -0.622366621 | MGI:3027390 | Lrrc4b   |
| ENSMUST00000035925.6  | -0.620593864 | MGI:1916951 | Slc7a6os |
| ENSMUST00000201352.3  | -0.620593864 | MGI:1333875 | Babam2   |
| ENSMUST00000021864.7  | -0.619203947 | MGI:105082  | Ssr1     |
| ENSMUST00000057188.6  | -0.619203947 | MGI:104615  | Cnr1     |
| ENSMUST00000123948.7  | -0.619203947 | MGI:104913  | Abi1     |
| ENSMUST00000165576.7  | -0.618267207 | MGI:107892  | Fam3c    |
| ENSMUST00000065364.4  | -0.616026167 | MGI:1913950 | Chmp3    |
| ENSMUST00000160379.3  | -0.615071224 | MGI:1330828 | Cdk5r2   |



|                       |              |             |         |
|-----------------------|--------------|-------------|---------|
| ENSMUST00000072406.4  | -0.615013612 | MGI:2441932 | Prepl   |
| ENSMUST00000082365.5  | -0.60951157  | MGI:1888971 | Sult4a1 |
| ENSMUST00000023391.15 | -0.608453623 | MGI:1332635 | Mrpl40  |
| ENSMUST00000031560.13 | -0.608453623 | MGI:1924947 | Mmab    |
| ENSMUST00000036615.6  | -0.608453623 | MGI:1889341 | Hacd3   |
| ENSMUST00000025290.6  | -0.606705025 | MGI:1098233 | Impact  |
| ENSMUST00000027451.12 | -0.606705025 | MGI:98277   | Epha4   |
| ENSMUST00000029092.12 | -0.606705025 | MGI:2183559 | Arfgap1 |
| ENSMUST00000031390.9  | -0.606705025 | MGI:1346076 | Mmp17   |
| ENSMUST00000036210.6  | -0.606705025 | MGI:2444232 | Poglut1 |
| ENSMUST00000045247.8  | -0.606705025 | MGI:2158400 | Wdr18   |
| ENSMUST00000220449.1  | -0.606705025 | MGI:5012260 | Gm20075 |
| ENSMUST00000047328.10 | -0.605339787 | MGI:96437   | Igfbp2  |
| ENSMUST00000018184.9  | -0.603261733 | MGI:1922028 | Rrp7a   |
| ENSMUST00000021390.8  | -0.603261733 | MGI:95636   | Galc    |
| ENSMUST00000022699.9  | -0.603261733 | MGI:1195462 | Gfra2   |
| ENSMUST00000025243.4  | -0.603261733 | MGI:1920723 | Iws1    |
| ENSMUST00000025805.7  | -0.603261733 | MGI:1277225 | Cnih2   |
| ENSMUST00000026859.10 | -0.603261733 | MGI:1919425 | Mfsd8   |
| ENSMUST00000028752.7  | -0.603261733 | MGI:2443189 | Vps39   |
| ENSMUST00000035766.12 | -0.603261733 | MGI:1919654 | Wdr44   |
| ENSMUST00000045235.7  | -0.603261733 | MGI:2141466 | Bmt2    |
| ENSMUST00000047257.14 | -0.603261733 | MGI:2387638 | Katnal1 |
| ENSMUST00000067918.11 | -0.603261733 | MGI:2442087 | Ppm1h   |
| ENSMUST00000068233.10 | -0.603261733 | MGI:1913272 | Kcnmb4  |
| ENSMUST00000077737.12 | -0.603261733 | MGI:1914632 | Brd3    |
| ENSMUST00000085814.4  | -0.603261733 | MGI:1276523 | Ncoa1   |
| ENSMUST00000109741.8  | -0.603261733 | MGI:1861901 | Mast1   |
| ENSMUST00000117061.7  | -0.603261733 | MGI:894310  | Septin8 |
| ENSMUST00000143783.8  | -0.603261733 | MGI:96785   | Lhx2    |
| ENSMUST00000156481.7  | -0.603261733 | MGI:1914249 | Med28   |
| ENSMUST00000166820.7  | -0.603261733 | MGI:1919000 | R3hdm2  |
| ENSMUST00000200535.5  | -0.603261733 | MGI:1888998 | Usp29   |
| ENSMUST00000224797.1  | -0.603261733 | MGI:1860775 | Actr8   |
| ENSMUST00000238569.1  | -0.603261733 | MGI:1340044 | Lrp8    |
| ENSMUST00000231335.1  | -0.602627765 | MGI:6215011 | Gm49601 |
| ENSMUST00000114666.8  | -0.601880908 | MGI:1201780 | Atp6v1a |
| ENSMUST00000020804.7  | -0.597361368 | MGI:1913819 | Gdpd1   |
| ENSMUST00000021554.15 | -0.597361368 | MGI:2137706 | Actn1   |

|                       |              |             |               |
|-----------------------|--------------|-------------|---------------|
| ENSMUST00000044766.14 | -0.597361368 | MGI:1923029 | 4930402H24Rik |
| ENSMUST00000064107.6  | -0.597361368 | MGI:1921944 | Tbc1d30       |
| ENSMUST00000076372.4  | -0.597361368 | MGI:109580  | Sf3b4         |
| ENSMUST00000089215.11 | -0.597361368 | MGI:1858223 | Cntn6         |
| ENSMUST00000102781.9  | -0.597361368 | MGI:96628   | Jak1          |
| ENSMUST00000025356.3  | -0.59630625  | MGI:2146021 | Mal2          |
| ENSMUST00000017534.14 | -0.596038331 | MGI:101863  | Aldoc         |
| ENSMUST00000001042.9  | -0.59573104  | MGI:1915031 | Ilf2          |
| ENSMUST00000007130.14 | -0.595467777 | MGI:88276   | Ctnnb1        |
| ENSMUST00000021062.11 | -0.594534132 | MGI:105037  | Ddx5          |
| ENSMUST00000022601.6  | -0.592295152 | MGI:109568  | Wbp4          |
| ENSMUST00000034326.6  | -0.592295152 | MGI:2180801 | Atp13a1       |
| ENSMUST00000110857.4  | -0.592295152 | MGI:107450  | Dld           |
| ENSMUST00000177955.7  | -0.592295152 | MGI:1913353 | Naxd          |
| ENSMUST00000180086.2  | -0.592295152 | MGI:95893   | H1f0          |
| ENSMUST00000190571.6  | -0.592295152 | MGI:1923957 | Clasp1        |
| ENSMUST00000215683.1  | -0.592295152 | MGI:1924113 | Dcun1d5       |
| ENSMUST00000004508.12 | -0.592089781 | MGI:1915070 | Tmed4         |
| ENSMUST00000033497.8  | -0.592089781 | MGI:1859638 | Pqbp1         |
| ENSMUST00000030787.8  | -0.589468931 | MGI:97912   | Rheb          |
| ENSMUST00000028509.10 | -0.58870454  | MGI:2135962 | Gorasp2       |
| ENSMUST00000049357.9  | -0.58870454  | MGI:1917838 | Pnrc1         |
| ENSMUST00000155671.7  | -0.58870454  | MGI:1928344 | Vps29         |
| ENSMUST00000049509.6  | -0.587536362 | MGI:2142534 | Vat1l         |
| ENSMUST00000025862.14 | -0.587186727 | MGI:99603   | Smarca2       |
| ENSMUST00000170788.8  | -0.587186727 | MGI:1353557 | Schip1        |
| ENSMUST00000042477.12 | -0.586382103 | MGI:106354  | Vps25         |
| ENSMUST00000033540.5  | -0.584231901 | MGI:1333804 | Vbp1          |
| ENSMUST00000022577.5  | -0.582719167 | MGI:1914552 | Zc3h13        |
| ENSMUST00000031354.10 | -0.582719167 | MGI:1861729 | Abcb9         |
| ENSMUST00000036187.8  | -0.582719167 | MGI:2387194 | Qsox2         |
| ENSMUST00000040853.10 | -0.582719167 | MGI:1917378 | Oxsr1         |
| ENSMUST00000044672.10 | -0.582719167 | MGI:1925584 | Cdk19         |
| ENSMUST00000097593.8  | -0.582719167 | MGI:1918552 | Arhgap26      |
| ENSMUST00000110000.7  | -0.582719167 | MGI:1915127 | Naa20         |
| ENSMUST00000115577.8  | -0.582719167 | MGI:1329042 | Sgce          |
| ENSMUST00000161659.7  | -0.582719167 | MGI:1332247 | Slc33a1       |
| ENSMUST00000166793.9  | -0.58136892  | MGI:1298379 | Matr3         |
| ENSMUST00000031099.3  | -0.579946122 | MGI:1334417 | Grpel1        |

|                       |              |             |               |
|-----------------------|--------------|-------------|---------------|
| ENSMUST00000011058.8  | -0.579424673 | MGI:1351627 | Pdhx          |
| ENSMUST00000023150.6  | -0.579424673 | MGI:1916303 | 1810013L24Rik |
| ENSMUST00000082094.4  | -0.579424673 | MGI:1917206 | Ptcd3         |
| ENSMUST00000210812.1  | -0.579424673 | MGI:1916249 | Anapc10       |
| ENSMUST00000028825.4  | -0.577820131 | MGI:1915465 | Fam98b        |
| ENSMUST00000034856.14 | -0.577820131 | MGI:97075   | Mpi           |
| ENSMUST00000103195.4  | -0.577820131 | MGI:3051596 | Znhit3        |
| ENSMUST00000130418.7  | -0.577820131 | MGI:1340024 | Aldh1l1       |
| ENSMUST00000167256.7  | -0.577820131 | MGI:1888697 | Taf9          |
| ENSMUST00000237871.1  | -0.577820131 | MGI:1914262 | Tm9sf3        |
| ENSMUST00000020705.4  | -0.576870648 | MGI:1890613 | Pes1          |
| ENSMUST00000162538.8  | -0.576870648 | MGI:1922083 | Ciapin1       |
| ENSMUST00000063694.9  | -0.576243082 | MGI:1354948 | Klf13         |
| ENSMUST00000068054.8  | -0.576243082 | MGI:1917777 | Stampb        |
| ENSMUST00000038228.10 | -0.571377789 | MGI:106558  | Tmx4          |
| ENSMUST00000163821.2  | -0.569960295 | MGI:1918903 | Shtn1         |
| ENSMUST00000237651.1  | -0.567991747 | MGI:1278334 | Zfand5        |
| ENSMUST00000000058.6  | -0.567858977 | MGI:107571  | Cav2          |
| ENSMUST00000015712.14 | -0.567858977 | MGI:96820   | Lpl           |
| ENSMUST00000028900.10 | -0.567858977 | MGI:2136772 | Vps16         |
| ENSMUST00000031051.7  | -0.567858977 | MGI:1915817 | Cgref1        |
| ENSMUST00000034472.15 | -0.567858977 | MGI:1933825 | Jam3          |
| ENSMUST00000042405.7  | -0.567858977 | MGI:95486   | Fbl           |
| ENSMUST00000154460.7  | -0.567858977 | MGI:1929212 | Ap3m1         |
| ENSMUST00000168410.8  | -0.567858977 | MGI:2443456 | Tbc1d24       |
| ENSMUST00000205573.1  | -0.567858977 | MGI:99137   | Xrcc1         |
| ENSMUST00000223272.1  | -0.567858977 | MGI:1914596 | Daam1         |
| ENSMUST00000232873.1  | -0.567858977 | MGI:109489  | Snrpc         |
| ENSMUST00000111089.7  | -0.567677628 | MGI:97314   | Nefm          |
| ENSMUST00000000287.8  | -0.565273527 | MGI:1921867 | Scpep1        |
| ENSMUST00000002048.7  | -0.565273527 | MGI:1917457 | Taco1         |
| ENSMUST00000003677.10 | -0.565273527 | MGI:1918923 | Rnf215        |
| ENSMUST00000029374.7  | -0.565273527 | MGI:1347075 | Nbea          |
| ENSMUST00000029570.8  | -0.565273527 | MGI:1201609 | Mfsd14a       |
| ENSMUST00000031795.7  | -0.565273527 | MGI:1350921 | Fkbp9         |
| ENSMUST00000038523.14 | -0.565273527 | MGI:2682307 | Ric8b         |
| ENSMUST00000047091.13 | -0.565273527 | MGI:1916065 | Btbd10        |
| ENSMUST00000052185.4  | -0.565273527 | MGI:2152819 | B3galt6       |
| ENSMUST00000091257.10 | -0.565273527 | MGI:1914664 | Mfn1          |

|                       |              |             |           |
|-----------------------|--------------|-------------|-----------|
| ENSMUST00000092915.11 | -0.565273527 | MGI:1921398 | Cluh      |
| ENSMUST00000102549.9  | -0.565273527 | MGI:1921802 | Nipal3    |
| ENSMUST00000105682.8  | -0.565273527 | MGI:2683486 | Rere      |
| ENSMUST00000108493.2  | -0.565273527 | MGI:3654828 | Dact3     |
| ENSMUST00000166743.8  | -0.565273527 | MGI:2444022 | Mapk1ip1l |
| ENSMUST00000038446.9  | -0.563641245 | MGI:107494  | Myl12b    |
| ENSMUST00000082437.9  | -0.563641245 | MGI:1927947 | Selenof   |
| ENSMUST00000226053.1  | -0.563460573 | MGI:1194492 | Hdgfl2    |
| ENSMUST00000021959.10 | -0.563015378 | MGI:1916922 | Txndc15   |
| ENSMUST00000061483.8  | -0.563015378 | MGI:88184   | Bmyc      |
| ENSMUST00000029684.14 | -0.561829581 | MGI:1346346 | Scamp3    |
| ENSMUST00000033182.9  | -0.561636442 | MGI:1195267 | Ilk       |
| ENSMUST00000028511.7  | -0.561153739 | MGI:1859652 | Mtx2      |
| ENSMUST00000032874.13 | -0.561153739 | MGI:700011  | Sh3gl3    |
| ENSMUST00000109905.4  | -0.559167151 | MGI:1914761 | Tmed9     |
| ENSMUST00000121820.8  | -0.559167151 | MGI:1891351 | Spock2    |
| ENSMUST00000005509.10 | -0.558515387 | MGI:109355  | Stx1a     |
| ENSMUST00000002289.7  | -0.557408902 | MGI:1355274 | Uchl3     |
| ENSMUST00000025893.6  | -0.557408902 | MGI:1928393 | Arl2      |
| ENSMUST00000028250.8  | -0.557408902 | MGI:1915121 | Mrrf      |
| ENSMUST00000120285.7  | -0.557408902 | MGI:1929464 | Sec11a    |
| ENSMUST00000148843.9  | -0.557408902 | MGI:1891692 | Hnrnpr    |
| ENSMUST00000167496.7  | -0.557408902 | MGI:1925927 | Rnf20     |
| ENSMUST00000195014.5  | -0.554519287 | MGI:1913506 | Ssr2      |
| ENSMUST00000021297.5  | -0.553707078 | MGI:1919592 | Lsm12     |
| ENSMUST00000058418.7  | -0.553630985 | MGI:2385330 | Slc29a4   |
| ENSMUST00000001280.13 | -0.550272546 | MGI:105490  | Gramd1a   |
| ENSMUST00000014421.14 | -0.550272546 | MGI:1932101 | Ankrd17   |
| ENSMUST00000018795.12 | -0.550272546 | MGI:2144471 | Tada2a    |
| ENSMUST00000030771.11 | -0.550272546 | MGI:99470   | Dnajc2    |
| ENSMUST00000032920.4  | -0.550272546 | MGI:105491  | Cdipt     |
| ENSMUST00000036682.8  | -0.550272546 | MGI:1289230 | Pxk       |
| ENSMUST00000038356.12 | -0.550272546 | MGI:1917343 | Ube2q1    |
| ENSMUST00000043150.5  | -0.550272546 | MGI:1919129 | Acsl5     |
| ENSMUST00000051145.14 | -0.550272546 | MGI:2139593 | Wdr47     |
| ENSMUST00000060253.4  | -0.550272546 | MGI:1335089 | Fem1a     |
| ENSMUST00000065797.6  | -0.550272546 | MGI:1924219 | Chst1     |
| ENSMUST00000068860.12 | -0.550272546 | MGI:108034  | Epha6     |
| ENSMUST00000082424.10 | -0.550272546 | MGI:894288  | Selenop   |

|                       |              |             |               |
|-----------------------|--------------|-------------|---------------|
| ENSMUST00000115716.8  | -0.550272546 | MGI:1921252 | Psd2          |
| ENSMUST00000121759.7  | -0.550272546 | MGI:1354961 | Synj1         |
| ENSMUST00000141722.7  | -0.550272546 | MGI:1926058 | Stxbp5        |
| ENSMUST00000143850.7  | -0.550272546 | MGI:2151483 | Derl2         |
| ENSMUST00000210032.1  | -0.550272546 | MGI:1915522 | Lingo1        |
| ENSMUST00000212459.1  | -0.550272546 | MGI:1342270 | Large1        |
| ENSMUST00000034441.7  | -0.550147118 | MGI:2384560 | Aars          |
| ENSMUST00000021177.14 | -0.547920217 | MGI:1921386 | Sec14l1       |
| ENSMUST00000026568.9  | -0.547920217 | MGI:1351664 | Ptdss2        |
| ENSMUST00000030894.14 | -0.547920217 | MGI:1920196 | Lrrc47        |
| ENSMUST00000058351.15 | -0.54677035  | MGI:97565   | Pgm1          |
| ENSMUST00000099092.7  | -0.54677035  | MGI:1862037 | Slc12a5       |
| ENSMUST00000153060.7  | -0.546088621 | MGI:108054  | Rit2          |
| ENSMUST00000074072.4  | -0.545316897 | MGI:3642298 | Rps18-ps6     |
| ENSMUST00000036928.11 | -0.541624787 | MGI:95405   | Ephx1         |
| ENSMUST00000037636.3  | -0.54029284  | MGI:96568   | Ina           |
| ENSMUST00000081677.11 | -0.54029284  | MGI:1917475 | Ppil3         |
| ENSMUST00000019638.14 | -0.539265907 | MGI:1349439 | Cops6         |
| ENSMUST00000027444.14 | -0.539265907 | MGI:1270843 | Pde6d         |
| ENSMUST00000033673.6  | -0.539265907 | MGI:1855692 | Nono          |
| ENSMUST00000045366.9  | -0.539265907 | MGI:2142792 | Dcun1d2       |
| ENSMUST00000064910.6  | -0.539265907 | MGI:1329037 | Strap         |
| ENSMUST00000119797.7  | -0.539265907 | MGI:1929459 | Rabgef1       |
| ENSMUST00000126641.1  | -0.539265907 | MGI:1333805 | Srsf10        |
| ENSMUST00000178691.1  | -0.539265907 | MGI:95049   | Ubl4a         |
| ENSMUST00000048613.13 | -0.539236137 | MGI:2444149 | A830018L16Rik |
| ENSMUST00000039144.6  | -0.538070402 | MGI:1929895 | Clstn1        |
| ENSMUST00000003572.9  | -0.537235349 | MGI:2449057 | Gars          |
| ENSMUST00000018651.13 | -0.537235349 | MGI:1341836 | Trpv2         |
| ENSMUST00000031985.12 | -0.537235349 | MGI:1859353 | Mkrn1         |
| ENSMUST00000108883.9  | -0.537235349 | MGI:88255   | Anxa6         |
| ENSMUST00000204702.2  | -0.537235349 | MGI:107422  | Hspa4l        |
| ENSMUST00000206984.1  | -0.537235349 | MGI:1339975 | Pak1          |
| ENSMUST00000173114.7  | -0.53619568  | MGI:88548   | Csnk2b        |
| ENSMUST00000022962.7  | -0.534230347 | MGI:1913986 | Emc2          |
| ENSMUST00000034903.6  | -0.534230347 | MGI:1309515 | Gsta4         |
| ENSMUST00000030541.12 | -0.531340416 | MGI:109369  | Hp1bp3        |
| ENSMUST00000031556.13 | -0.531340416 | MGI:1919150 | Tmem106b      |
| ENSMUST00000168361.7  | -0.531340416 | MGI:1931751 | Pum2          |

|                       |              |             |               |
|-----------------------|--------------|-------------|---------------|
| ENSMUST00000061446.7  | -0.52895433  | MGI:3607706 | Tmem130       |
| ENSMUST00000053766.13 | -0.528544176 | MGI:1345634 | Amfr          |
| ENSMUST00000067327.10 | -0.525841966 | MGI:104565  | Cdkn1b        |
| ENSMUST00000010348.6  | -0.525799565 | MGI:1915415 | Fdx2          |
| ENSMUST00000022787.7  | -0.525799565 | MGI:1355323 | Slc7a8        |
| ENSMUST00000023882.13 | -0.525799565 | MGI:1915438 | Sympk         |
| ENSMUST00000053336.7  | -0.525799565 | MGI:1919440 | 2510009E07Rik |
| ENSMUST00000102742.10 | -0.525799565 | MGI:1915312 | Btf3l4        |
| ENSMUST00000105617.7  | -0.525799565 | MGI:2444159 | Ipcef1        |
| ENSMUST00000130643.8  | -0.525799565 | MGI:106908  | Srpk1         |
| ENSMUST00000192503.1  | -0.525799565 | MGI:2447313 | Pcdha3        |
| ENSMUST00000069066.13 | -0.525471425 | MGI:1261783 | Fam49a        |
| ENSMUST00000027916.12 | -0.52452465  | MGI:1338800 | Bpnt1         |
| ENSMUST00000016638.7  | -0.524055292 | MGI:88329   | Cd34          |
| ENSMUST00000028408.2  | -0.524055292 | MGI:96013   | Hat1          |
| ENSMUST00000068045.13 | -0.524055292 | MGI:1890773 | Actn4         |
| ENSMUST00000026743.13 | -0.523690356 | MGI:107876  | Uqcrc1        |
| ENSMUST00000029075.4  | -0.523200301 | MGI:1924079 | Dok5          |
| ENSMUST00000063417.10 | -0.523200301 | MGI:1926232 | Srsf7         |
| ENSMUST00000094329.10 | -0.523200301 | MGI:2153045 | Elmo2         |
| ENSMUST00000062356.6  | -0.522557856 | MGI:97143   | Marcksl1      |
| ENSMUST00000094657.9  | -0.522356442 | MGI:1915848 | Dnajc8        |
| ENSMUST00000167662.7  | -0.519682036 | MGI:1914708 | Ergic1        |
| ENSMUST00000049126.12 | -0.519247764 | MGI:2152889 | Dner          |
| ENSMUST00000031058.14 | -0.518168684 | MGI:2140967 | Mapre3        |
| ENSMUST00000110105.9  | -0.518168684 | MGI:1919824 | Zc3h14        |
| ENSMUST00000188346.6  | -0.518168684 | MGI:1928739 | Dnajb2        |
| ENSMUST00000022517.8  | -0.517335855 | MGI:1915881 | Cryl1         |
| ENSMUST00000017408.13 | -0.515686902 | MGI:1355322 | Exosc10       |
| ENSMUST00000022163.14 | -0.515686902 | MGI:1202875 | Btf3          |
| ENSMUST00000031121.9  | -0.515686902 | MGI:95616   | Gabra4        |
| ENSMUST00000089302.10 | -0.515686902 | MGI:894681  | Usp9x         |
| ENSMUST00000105369.7  | -0.515686902 | MGI:1354170 | Cbarp         |
| ENSMUST00000110036.10 | -0.515686902 | MGI:95481   | Ptk2          |
| ENSMUST00000081834.9  | -0.513422704 | MGI:1918953 | Armcx3        |
| ENSMUST00000174548.7  | -0.513422704 | MGI:104816  | Hnrnpl        |
| ENSMUST00000024486.13 | -0.508938686 | MGI:1928138 | Mrps23        |
| ENSMUST00000110388.9  | -0.508938686 | MGI:109602  | Gphn          |
| ENSMUST00000165175.7  | -0.508938686 | MGI:1927338 | Sv2b          |

|                       |              |             |         |
|-----------------------|--------------|-------------|---------|
| ENSMUST00000040381.14 | -0.50668008  | MGI:2385165 | Ncoa5   |
| ENSMUST00000075657.7  | -0.50668008  | MGI:1337060 | Ap3s2   |
| ENSMUST00000114787.7  | -0.50668008  | MGI:2443815 | Stxbp5l |
| ENSMUST00000117598.7  | -0.50668008  | MGI:2146407 | Vps8    |
| ENSMUST00000178636.1  | -0.50668008  | MGI:1890165 | Larp1   |
| ENSMUST00000040656.7  | -0.505349248 | MGI:1915271 | Bphl    |
| ENSMUST00000087933.9  | -0.505349248 | MGI:102724  | Tpp2    |
| ENSMUST00000001127.10 | -0.499980999 | MGI:1915061 | Poldip2 |
| ENSMUST00000031788.8  | -0.499980999 | MGI:1889802 | Hibadh  |
| ENSMUST00000094651.3  | -0.499980999 | MGI:1924095 | Eid2b   |
| ENSMUST00000031513.13 | -0.498606963 | MGI:104896  | Srsf9   |
| ENSMUST00000049658.13 | -0.498606963 | MGI:1197524 | Pitpnm1 |
| ENSMUST00000057578.15 | -0.498606963 | MGI:1917297 | Trnt1   |
| ENSMUST00000090929.11 | -0.498606963 | MGI:1919546 | Rusc1   |
| ENSMUST00000161576.7  | -0.498606963 | MGI:1927406 | Herpud1 |
| ENSMUST00000069718.14 | -0.498541638 | MGI:1347093 | Fto     |
| ENSMUST00000034740.14 | -0.496857929 | MGI:97297   | Nedd4   |
| ENSMUST00000102874.10 | -0.496244049 | MGI:97051   | Mdh1    |
| ENSMUST00000029256.8  | -0.495050751 | MGI:1916526 | Sec62   |
| ENSMUST00000105365.8  | -0.494973409 | MGI:893588  | Cirbp   |
| ENSMUST00000017946.5  | -0.494581867 | MGI:1915248 | Retreg3 |
| ENSMUST00000021066.3  | -0.494581867 | MGI:1859167 | Cacng4  |
| ENSMUST00000021183.3  | -0.494581867 | MGI:1889295 | Eral1   |
| ENSMUST00000024078.14 | -0.494581867 | MGI:1915207 | Marchf5 |
| ENSMUST00000025264.7  | -0.494581867 | MGI:1921570 | Wdr33   |
| ENSMUST00000029060.10 | -0.494581867 | MGI:1330826 | Atp9a   |
| ENSMUST00000034611.14 | -0.494581867 | MGI:2143230 | Phldb1  |
| ENSMUST00000035985.7  | -0.494581867 | MGI:2444450 | Fbxl18  |
| ENSMUST00000035988.15 | -0.494581867 | MGI:2145316 | Txndc5  |
| ENSMUST00000036226.5  | -0.494581867 | MGI:2444737 | Fem1c   |
| ENSMUST00000036759.10 | -0.494581867 | MGI:106463  | Washc2  |
| ENSMUST00000036862.4  | -0.494581867 | MGI:2145130 | Cog5    |
| ENSMUST00000037119.3  | -0.494581867 | MGI:94901   | Dlx1    |
| ENSMUST00000041375.10 | -0.494581867 | MGI:2445031 | Sik2    |
| ENSMUST00000042456.3  | -0.494581867 | MGI:1349403 | B3galt1 |
| ENSMUST00000042767.8  | -0.494581867 | MGI:2679448 | Slitrk5 |
| ENSMUST00000046254.2  | -0.494581867 | MGI:1917780 | Lrfn2   |
| ENSMUST00000046835.13 | -0.494581867 | MGI:2444668 | Fnip1   |
| ENSMUST00000059914.12 | -0.494581867 | MGI:1913435 | Virma   |

|                       |              |             |          |
|-----------------------|--------------|-------------|----------|
| ENSMUST00000061578.8  | -0.494581867 | MGI:2443480 | Setx     |
| ENSMUST00000063551.6  | -0.494581867 | MGI:106334  | Rgs7bp   |
| ENSMUST00000076270.12 | -0.494581867 | MGI:1860236 | Rabep1   |
| ENSMUST00000076949.12 | -0.494581867 | MGI:1921504 | Gpn1     |
| ENSMUST00000077821.9  | -0.494581867 | MGI:107858  | Arhgap39 |
| ENSMUST00000080449.6  | -0.494581867 | MGI:96243   | Hspa2    |
| ENSMUST00000086325.12 | -0.494581867 | MGI:2442638 | Flywch1  |
| ENSMUST00000087031.6  | -0.494581867 | MGI:1913789 | Xpo5     |
| ENSMUST00000097644.8  | -0.494581867 | MGI:3036234 | Hdac4    |
| ENSMUST00000099384.3  | -0.494581867 | MGI:2145317 | Brd9     |
| ENSMUST00000099414.4  | -0.494581867 | MGI:4834573 | Zfp955b  |
| ENSMUST00000100125.11 | -0.494581867 | MGI:1916259 | Thap7    |
| ENSMUST00000102793.10 | -0.494581867 | MGI:2137022 | Tm2d1    |
| ENSMUST00000107749.3  | -0.494581867 | MGI:2386030 | Gabbr2   |
| ENSMUST00000112701.7  | -0.494581867 | MGI:2442792 | Cdh7     |
| ENSMUST00000115160.9  | -0.494581867 | MGI:1919899 | Tmem209  |
| ENSMUST00000119245.7  | -0.494581867 | MGI:1928469 | Trip4    |
| ENSMUST00000128616.5  | -0.494581867 | MGI:1922843 | Malsu1   |
| ENSMUST00000132527.8  | -0.494581867 | MGI:894686  | Col9a3   |
| ENSMUST00000153148.7  | -0.494581867 | MGI:1922909 | Wdr54    |
| ENSMUST00000162645.7  | -0.494581867 | MGI:3040693 | Zmiz1    |
| ENSMUST00000167715.7  | -0.494581867 | MGI:107157  | Sin3a    |
| ENSMUST00000171847.7  | -0.494581867 | MGI:1927073 | Slc29a1  |
| ENSMUST00000173246.7  | -0.494581867 | MGI:104813  | Jarid2   |
| ENSMUST00000174766.1  | -0.494581867 | MGI:2143628 | L3mbtl3  |
| ENSMUST00000178384.1  | -0.494581867 | MGI:1915555 | Moap1    |
| ENSMUST00000191268.6  | -0.494581867 | MGI:1922919 | Pik3r4   |
| ENSMUST00000194190.1  | -0.494581867 | MGI:1935212 | Pcdhga1  |
| ENSMUST00000222314.1  | -0.494581867 | MGI:107595  | Sp4      |
| ENSMUST00000237880.1  | -0.494581867 | MGI:1917675 | Csnk1g3  |
| ENSMUST00000003345.9  | -0.494388187 | MGI:103574  | Amph     |
| ENSMUST00000010899.13 | -0.493872518 | MGI:1351477 | Cars     |
| ENSMUST00000019975.13 | -0.493809509 | MGI:1890563 | Wasf1    |
| ENSMUST00000167199.2  | -0.493231264 | MGI:2137219 | Mrpl16   |
| ENSMUST00000036951.12 | -0.491594883 | MGI:1344408 | Pebp1    |
| ENSMUST00000010536.8  | -0.491329406 | MGI:1858260 | Gosr1    |
| ENSMUST00000027592.5  | -0.491329406 | MGI:1915062 | Ubxn4    |
| ENSMUST00000090568.6  | -0.491329406 | MGI:97816   | Ptprz1   |
| ENSMUST00000099547.3  | -0.491329406 | MGI:2145496 | Fam8a1   |



|                       |              |             |          |
|-----------------------|--------------|-------------|----------|
| ENSMUST00000170928.7  | -0.491329406 | MGI:1913463 | Med7     |
| ENSMUST00000021459.13 | -0.490291285 | MGI:1916865 | Rab15    |
| ENSMUST00000023507.12 | -0.488874399 | MGI:1861437 | Gsk3b    |
| ENSMUST00000034198.14 | -0.487270186 | MGI:95775   | Gnao1    |
| ENSMUST00000051477.12 | -0.486083439 | MGI:106211  | Cdc42    |
| ENSMUST00000034426.13 | -0.485903875 | MGI:1934754 | Kars     |
| ENSMUST00000003946.8  | -0.484735254 | MGI:1914869 | Nob1     |
| ENSMUST00000017354.12 | -0.484735254 | MGI:1344385 | Med24    |
| ENSMUST00000017637.12 | -0.484735254 | MGI:96439   | Igfbp4   |
| ENSMUST00000040314.11 | -0.484735254 | MGI:1924188 | Rbm17    |
| ENSMUST00000103015.3  | -0.484735254 | MGI:1914858 | Narf     |
| ENSMUST00000159086.9  | -0.484735254 | MGI:1921793 | Zfp871   |
| ENSMUST00000025505.6  | -0.484317303 | MGI:1914915 | Dctn4    |
| ENSMUST00000001834.3  | -0.483357524 | MGI:106379  | Rtcb     |
| ENSMUST00000109764.7  | -0.483357524 | MGI:97311   | Nfix     |
| ENSMUST00000034244.8  | -0.481784181 | MGI:1921416 | Tmem38a  |
| ENSMUST00000163153.8  | -0.481784181 | MGI:97887   | Rdx      |
| ENSMUST00000002413.14 | -0.48130425  | MGI:2384577 | Tmem161a |
| ENSMUST00000003536.8  | -0.48130425  | MGI:1914474 | Med29    |
| ENSMUST00000025830.8  | -0.48130425  | MGI:1860297 | Apba1    |
| ENSMUST00000028350.8  | -0.48130425  | MGI:1914437 | Zmynd19  |
| ENSMUST00000031198.10 | -0.48130425  | MGI:1914516 | Dipk1a   |
| ENSMUST00000034228.15 | -0.48130425  | MGI:1349429 | Arl2bp   |
| ENSMUST00000038374.12 | -0.48130425  | MGI:97499   | Pcca     |
| ENSMUST00000040514.7  | -0.48130425  | MGI:109334  | Irs2     |
| ENSMUST00000042035.15 | -0.48130425  | MGI:1933736 | Adgrb1   |
| ENSMUST00000068916.15 | -0.48130425  | MGI:1919160 | Plpp5    |
| ENSMUST00000080368.12 | -0.48130425  | MGI:1354710 | Atp8a2   |
| ENSMUST00000101164.10 | -0.48130425  | MGI:1924819 | Limch1   |
| ENSMUST00000121326.7  | -0.48130425  | MGI:1916457 | Srsf11   |
| ENSMUST00000141755.7  | -0.48130425  | MGI:1914743 | Mettl16  |
| ENSMUST00000166280.7  | -0.48130425  | MGI:2146838 | DIK2     |
| ENSMUST00000171691.8  | -0.48130425  | MGI:1922012 | Mdga1    |
| ENSMUST00000192069.5  | -0.48130425  | MGI:99516   | Tnr      |
| ENSMUST00000231360.1  | -0.48130425  | MGI:2443596 | Senp5    |
| ENSMUST00000026009.9  | -0.479528377 | MGI:1929699 | Arl3     |
| ENSMUST00000070658.15 | -0.479528377 | MGI:2447670 | Mgrn1    |
| ENSMUST00000030816.3  | -0.478732501 | MGI:1196227 | Dffa     |
| ENSMUST00000035058.9  | -0.478732501 | MGI:1352747 | Cspg5    |

|                       |              |             |          |
|-----------------------|--------------|-------------|----------|
| ENSMUST00000043962.8  | -0.478732501 | MGI:1917207 | Cdc16    |
| ENSMUST00000063886.3  | -0.478732501 | MGI:102806  | Acvr2a   |
| ENSMUST00000068282.6  | -0.478732501 | MGI:1929492 | Atl2     |
| ENSMUST00000103198.10 | -0.478732501 | MGI:1914384 | Nop56    |
| ENSMUST00000028005.2  | -0.478106316 | MGI:1913697 | Mgst3    |
| ENSMUST00000019382.16 | -0.4769859   | MGI:1915408 | Tecr     |
| ENSMUST00000017548.6  | -0.475422837 | MGI:98020   | Rpl19    |
| ENSMUST00000153500.7  | -0.474255512 | MGI:97744   | Por      |
| ENSMUST00000020223.7  | -0.473244955 | MGI:2444679 | Tcp11l2  |
| ENSMUST00000030457.11 | -0.473244955 | MGI:1355328 | Nasp     |
| ENSMUST00000033198.5  | -0.473244955 | MGI:102675  | Crym     |
| ENSMUST00000102993.9  | -0.473244955 | MGI:104632  | Ube2h    |
| ENSMUST00000165199.7  | -0.473244955 | MGI:88077   | Arsa     |
| ENSMUST00000022634.8  | -0.471495847 | MGI:1332659 | Bnip3l   |
| ENSMUST00000021807.12 | -0.470272524 | MGI:1926209 | Dek      |
| ENSMUST00000022450.5  | -0.470272524 | MGI:1921694 | Tasor    |
| ENSMUST00000031598.10 | -0.470272524 | MGI:1919240 | Ddx54    |
| ENSMUST00000033541.4  | -0.470272524 | MGI:1914641 | Fundc2   |
| ENSMUST00000036407.5  | -0.470272524 | MGI:2147545 | Fam160b1 |
| ENSMUST00000040971.13 | -0.470272524 | MGI:1100859 | Capn5    |
| ENSMUST00000045537.3  | -0.470272524 | MGI:88399   | Chrm4    |
| ENSMUST00000051310.12 | -0.470272524 | MGI:2150302 | Ddhd1    |
| ENSMUST00000053768.13 | -0.470272524 | MGI:2384963 | Stxbp6   |
| ENSMUST00000055195.10 | -0.470272524 | MGI:1861746 | Lmbr1    |
| ENSMUST00000067786.8  | -0.470272524 | MGI:97851   | Slc20a2  |
| ENSMUST00000067924.12 | -0.470272524 | MGI:2140839 | Lrrc8c   |
| ENSMUST00000068351.13 | -0.470272524 | MGI:2141485 | Lrtm2    |
| ENSMUST00000085701.6  | -0.470272524 | MGI:1917631 | Tecpr1   |
| ENSMUST00000089362.8  | -0.470272524 | MGI:1913565 | Senp7    |
| ENSMUST00000097888.9  | -0.470272524 | MGI:2446630 | Ago1     |
| ENSMUST00000100196.8  | -0.470272524 | MGI:2384774 | Alg1     |
| ENSMUST00000109552.2  | -0.470272524 | MGI:97860   | Rasa1    |
| ENSMUST00000115609.9  | -0.470272524 | MGI:88470   | Comt     |
| ENSMUST00000115642.7  | -0.470272524 | MGI:1333752 | Hdac6    |
| ENSMUST00000224726.2  | -0.470272524 | MGI:97520   | Pcx      |
| ENSMUST00000018992.3  | -0.468208981 | MGI:1914297 | Rars     |
| ENSMUST00000040907.7  | -0.468208981 | MGI:1347059 | Decr2    |
| ENSMUST00000070334.9  | -0.468208981 | MGI:1915651 | G6pc3    |
| ENSMUST00000081593.12 | -0.467218263 | MGI:97555   | Pgk1     |

|                       |              |             |               |
|-----------------------|--------------|-------------|---------------|
| ENSMUST00000025649.9  | -0.465351086 | MGI:1202384 | Ddb1          |
| ENSMUST00000135454.7  | -0.463571016 | MGI:1921348 | Czib          |
| ENSMUST00000043964.12 | -0.463378037 | MGI:1328355 | Wfs1          |
| ENSMUST00000020263.13 | -0.462678058 | MGI:1926462 | Hnrnph3       |
| ENSMUST00000029444.12 | -0.460961035 | MGI:2137357 | Trim33        |
| ENSMUST00000032165.15 | -0.460961035 | MGI:1928760 | Ruvbl1        |
| ENSMUST00000037376.13 | -0.460961035 | MGI:1860418 | Nagk          |
| ENSMUST00000048898.16 | -0.460961035 | MGI:1891693 | Mtmr7         |
| ENSMUST00000057093.6  | -0.460961035 | MGI:1924536 | Nkrf          |
| ENSMUST00000059407.8  | -0.460961035 | MGI:2679447 | Slitrk3       |
| ENSMUST00000066936.8  | -0.460961035 | MGI:1915089 | Gpsm1         |
| ENSMUST00000074144.10 | -0.460961035 | MGI:91860   | Dcaf8         |
| ENSMUST00000089926.5  | -0.460961035 | MGI:1914782 | Mfap1a        |
| ENSMUST00000094215.9  | -0.460961035 | MGI:1891421 | Mesd          |
| ENSMUST00000095267.5  | -0.460961035 | MGI:96648   | Jund          |
| ENSMUST00000107425.7  | -0.460961035 | MGI:1915298 | Aen           |
| ENSMUST00000148721.7  | -0.460961035 | MGI:1916912 | 2310061104Rik |
| ENSMUST00000166652.1  | -0.460961035 | MGI:2446107 | Pde2a         |
| ENSMUST00000021114.4  | -0.459285648 | MGI:95730   | Galk1         |
| ENSMUST00000027989.12 | -0.459285648 | MGI:1330808 | Hsd17b7       |
| ENSMUST00000030872.11 | -0.459285648 | MGI:1347044 | Orc5          |
| ENSMUST00000040484.5  | -0.459285648 | MGI:1915383 | Gcsh          |
| ENSMUST00000117989.1  | -0.459285648 | MGI:1933212 | Ngrn          |
| ENSMUST00000166032.7  | -0.459285648 | MGI:1919884 | Tdrkh         |
| ENSMUST00000019470.13 | -0.458745527 | MGI:1096366 | Psme3         |
| ENSMUST00000005711.5  | -0.456099838 | MGI:1916203 | Chmp2a        |
| ENSMUST00000029499.14 | -0.456099838 | MGI:2442535 | Slc6a17       |
| ENSMUST00000102655.9  | -0.456099838 | MGI:1201792 | Pde1a         |
| ENSMUST00000006478.9  | -0.455314123 | MGI:1915011 | Tmem147       |
| ENSMUST00000226208.2  | -0.455314123 | MGI:1096572 | Zfand3        |
| ENSMUST00000230614.1  | -0.455314123 | MGI:1925868 | Acap2         |
| ENSMUST00000033866.8  | -0.45519284  | MGI:1917410 | Vps36         |
| ENSMUST00000000642.10 | -0.45299636  | MGI:1315197 | Hk2           |
| ENSMUST00000001148.10 | -0.45299636  | MGI:1890470 | Pcbp3         |
| ENSMUST00000011733.8  | -0.45299636  | MGI:1934858 | Fsd1          |
| ENSMUST00000022507.12 | -0.45299636  | MGI:1913895 | Pspc1         |
| ENSMUST00000030795.9  | -0.45299636  | MGI:1351657 | Abcf2         |
| ENSMUST00000031984.8  | -0.45299636  | MGI:95453   | Smarcad1      |
| ENSMUST00000047954.14 | -0.45299636  | MGI:106039  | Dtna          |

|                       |              |             |         |
|-----------------------|--------------|-------------|---------|
| ENSMUST00000066272.5  | -0.45299636  | MGI:1346348 | Taf7    |
| ENSMUST00000108156.8  | -0.45299636  | MGI:1918742 | Bbs7    |
| ENSMUST00000177236.7  | -0.45299636  | MGI:1914400 | Rnf141  |
| ENSMUST00000000544.11 | -0.451623169 | MGI:1338944 | Acvr1b  |
| ENSMUST00000093040.12 | -0.451623169 | MGI:105071  | Rab4b   |
| ENSMUST00000043907.13 | -0.451179417 | MGI:1930188 | Mrps34  |
| ENSMUST00000109142.7  | -0.45074239  | MGI:1891925 | Hnrnp1  |
| ENSMUST00000033933.6  | -0.44924167  | MGI:1915137 | Saraf   |
| ENSMUST00000038234.12 | -0.448184057 | MGI:1932386 | Ift122  |
| ENSMUST00000189220.6  | -0.448184057 | MGI:1333754 | Agfg1   |
| ENSMUST00000031131.10 | -0.44670019  | MGI:103149  | Uchl1   |
| ENSMUST00000003360.9  | -0.446105904 | MGI:1336193 | Car11   |
| ENSMUST00000028392.7  | -0.446105904 | MGI:1914111 | Dnajc10 |
| ENSMUST00000052670.10 | -0.446105904 | MGI:3026939 | Amer3   |
| ENSMUST00000057801.7  | -0.446105904 | MGI:104743  | Kcnj4   |
| ENSMUST00000060226.10 | -0.446105904 | MGI:1929269 | Tmed2   |
| ENSMUST00000082254.7  | -0.446105904 | MGI:1923467 | Jakmip2 |
| ENSMUST00000117766.7  | -0.446105904 | MGI:2137202 | Mrpl1   |
| ENSMUST00000210005.1  | -0.446105904 | MGI:1919030 | Isyna1  |
| ENSMUST00000230490.1  | -0.446105904 | MGI:103307  | Cacnb3  |
| ENSMUST00000030814.10 | -0.444604625 | MGI:101765  | Cdk5    |
| ENSMUST00000046963.9  | -0.4441913   | MGI:1346869 | Map2k4  |
| ENSMUST00000035779.14 | -0.443240623 | MGI:1921455 | Acsl3   |
| ENSMUST00000048409.13 | -0.442318698 | MGI:3583900 | Elmod1  |
| ENSMUST00000029087.3  | -0.441964813 | MGI:1919325 | Ogfr    |
| ENSMUST00000102536.10 | -0.44067995  | MGI:1914275 | Rpl11   |
| ENSMUST00000007814.9  | -0.440086006 | MGI:1336214 | Khsrp   |
| ENSMUST00000030538.4  | -0.440086006 | MGI:1194508 | Ddost   |
| ENSMUST00000068697.10 | -0.440086006 | MGI:1921537 | Kcmf1   |
| ENSMUST00000108052.9  | -0.440086006 | MGI:1919151 | Fam219a |
| ENSMUST00000111329.7  | -0.440086006 | MGI:2445003 | Arhgap1 |
| ENSMUST00000116514.3  | -0.440086006 | MGI:1891823 | Wbp11   |
| ENSMUST00000118886.8  | -0.440086006 | MGI:108104  | Snrk    |
| ENSMUST00000025250.13 | -0.440054043 | MGI:1919439 | Bag6    |
| ENSMUST00000031061.11 | -0.43914388  | MGI:1099786 | Dhx15   |
| ENSMUST00000021607.8  | -0.438838249 | MGI:1330838 | Lgmn    |
| ENSMUST00000023112.11 | -0.438686963 | MGI:1353418 | Pmm1    |
| ENSMUST00000059472.9  | -0.438596675 | MGI:2443731 | Mat2a   |
| ENSMUST00000060232.7  | -0.43849393  | MGI:1928750 | Rab2a   |

|                       |              |             |          |
|-----------------------|--------------|-------------|----------|
| ENSMUST00000078272.12 | -0.436786484 | MGI:88295   | Cacna2d1 |
| ENSMUST00000076325.11 | -0.436492292 | MGI:99532   | Mef2a    |
| ENSMUST00000088512.12 | -0.436492292 | MGI:97960   | Rnps1    |
| ENSMUST00000224188.1  | -0.435755488 | MGI:107592  | Hmgcs1   |
| ENSMUST00000023360.13 | -0.434781442 | MGI:2135951 | Mpv17l   |
| ENSMUST00000032443.13 | -0.434781442 | MGI:2687035 | Far2     |
| ENSMUST00000037843.6  | -0.434781442 | MGI:1916255 | Ubald1   |
| ENSMUST00000112304.9  | -0.434781442 | MGI:101841  | Ppm1b    |
| ENSMUST00000153609.7  | -0.434781442 | MGI:1916231 | Snrpa1   |
| ENSMUST00000061427.9  | -0.43399524  | MGI:3045353 | Adamts3  |
| ENSMUST00000025364.5  | -0.431639593 | MGI:1914430 | Yipf5    |
| ENSMUST00000072376.12 | -0.431639593 | MGI:1929668 | Rnf14    |
| ENSMUST00000005826.8  | -0.431435102 | MGI:88529   | Cs       |
| ENSMUST00000047935.7  | -0.430528814 | MGI:106393  | Tspyl4   |
| ENSMUST00000002080.11 | -0.43007183  | MGI:2443483 | Pdzd4    |
| ENSMUST00000038403.11 | -0.43007183  | MGI:96391   | Ica1     |
| ENSMUST00000086635.8  | -0.43007183  | MGI:1927542 | Pitpnb   |
| ENSMUST00000102962.9  | -0.43007183  | MGI:99605   | Cntfr    |
| ENSMUST00000102980.10 | -0.43007183  | MGI:1353494 | Akr1b3   |
| ENSMUST00000125304.7  | -0.43007183  | MGI:2443010 | Lman2l   |
| ENSMUST00000125366.7  | -0.43007183  | MGI:95886   | H13      |
| ENSMUST00000136983.7  | -0.43007183  | MGI:109529  | Dpf2     |
| ENSMUST00000163528.7  | -0.43007183  | MGI:1918928 | Brox     |
| ENSMUST00000163571.7  | -0.43007183  | MGI:894645  | Pick1    |
| ENSMUST00000103172.3  | -0.427361525 | MGI:1929270 | Dstn     |
| ENSMUST00000005714.13 | -0.427307034 | MGI:108278  | Ube2m    |
| ENSMUST00000033805.14 | -0.427307034 | MGI:1858898 | Psmc10   |
| ENSMUST00000028062.7  | -0.426439088 | MGI:98932   | Vim      |
| ENSMUST00000003710.9  | -0.42586237  | MGI:1098687 | Aak1     |
| ENSMUST00000025472.6  | -0.42586237  | MGI:3606062 | Pcyox1l  |
| ENSMUST00000030360.10 | -0.42586237  | MGI:1925059 | Lrrc42   |
| ENSMUST00000034437.7  | -0.42586237  | MGI:2442115 | Wdr59    |
| ENSMUST00000041685.6  | -0.42586237  | MGI:107755  | Neurod2  |
| ENSMUST00000053917.5  | -0.42586237  | MGI:1915224 | Ccny     |
| ENSMUST00000056521.11 | -0.42586237  | MGI:1914504 | Bmerb1   |
| ENSMUST00000093552.11 | -0.42586237  | MGI:1858259 | Tomm40   |
| ENSMUST00000162301.7  | -0.42586237  | MGI:1918995 | Cul2     |
| ENSMUST00000114551.9  | -0.42531035  | MGI:1347085 | Cetn2    |
| ENSMUST00000064667.8  | -0.423866424 | MGI:894315  | Rap1b    |

|                       |              |             |         |
|-----------------------|--------------|-------------|---------|
| ENSMUST00000028624.8  | -0.42316862  | MGI:1914342 | Gatm    |
| ENSMUST00000228009.1  | -0.422267244 | MGI:99670   | Dmtn    |
| ENSMUST00000022013.7  | -0.422077392 | MGI:99676   | Adcy2   |
| ENSMUST00000094028.9  | -0.422077392 | MGI:106227  | Capza1  |
| ENSMUST00000102875.10 | -0.422077392 | MGI:2183447 | Ugp2    |
| ENSMUST00000111915.7  | -0.422077392 | MGI:1921775 | Fam234b |
| ENSMUST00000210135.1  | -0.422077392 | MGI:1098749 | Erc2    |
| ENSMUST00000227556.1  | -0.422077392 | MGI:2444173 | Lmbrd2  |
| ENSMUST00000067384.5  | -0.421614101 | MGI:107949  | Rhob    |
| ENSMUST00000170836.3  | -0.420530208 | MGI:104885  | Psma2   |
| ENSMUST00000037547.8  | -0.419900153 | MGI:2388733 | Disp2   |
| ENSMUST00000026879.7  | -0.418655758 | MGI:1338002 | Gdap1   |
| ENSMUST00000030453.4  | -0.418655758 | MGI:1914346 | Mmachc  |
| ENSMUST00000064503.12 | -0.418655758 | MGI:1918115 | Lnpc    |
| ENSMUST00000097495.4  | -0.418655758 | MGI:3639495 | Dok6    |
| ENSMUST00000110748.3  | -0.418655758 | MGI:104750  | Nrcam   |
| ENSMUST00000141116.1  | -0.418655758 | MGI:1346320 | Taf10   |
| ENSMUST00000166123.8  | -0.418655758 | MGI:95309   | Eif5    |
| ENSMUST00000055506.8  | -0.415547538 | MGI:107887  | Gtf3c1  |
| ENSMUST00000188347.6  | -0.415547538 | MGI:2138446 | Atg9a   |
| ENSMUST00000085248.11 | -0.413800685 | MGI:1096551 | Morf4l1 |
| ENSMUST00000210999.1  | -0.413800685 | MGI:1929264 | Sae1    |
| ENSMUST00000007042.5  | -0.412711548 | MGI:1345142 | Ik      |
| ENSMUST00000059680.6  | -0.412711548 | MGI:1913879 | Golph3  |
| ENSMUST00000066597.12 | -0.412711548 | MGI:2443079 | Klhl26  |
| ENSMUST00000110325.7  | -0.412711548 | MGI:1919727 | Tmem87b |
| ENSMUST00000112532.7  | -0.412711548 | MGI:1098808 | Pex5    |
| ENSMUST00000147695.8  | -0.412711548 | MGI:1920209 | Lonrf2  |
| ENSMUST00000149441.7  | -0.412711548 | MGI:1915297 | Mpnd    |
| ENSMUST00000235966.1  | -0.412351716 | MGI:98107   | Rps14   |
| ENSMUST00000037401.9  | -0.41011352  | MGI:2444148 | Phf20   |
| ENSMUST00000075896.6  | -0.41011352  | MGI:1855672 | Tsnax   |
| ENSMUST00000077595.11 | -0.41011352  | MGI:1890212 | Porcn   |
| ENSMUST00000238823.1  | -0.41011352  | MGI:2442333 | Celf5   |
| ENSMUST00000049152.14 | -0.409178499 | MGI:1919232 | Snx10   |
| ENSMUST00000001809.14 | -0.407724706 | MGI:1349722 | Pabpc1  |
| ENSMUST00000025617.3  | -0.407724706 | MGI:1914688 | Rfk     |
| ENSMUST00000038521.13 | -0.407724706 | MGI:1913328 | Tsen34  |
| ENSMUST00000045376.10 | -0.407724706 | MGI:87930   | Adk     |

|                       |              |             |               |
|-----------------------|--------------|-------------|---------------|
| ENSMUST00000049621.6  | -0.407724706 | MGI:104876  | Hes5          |
| ENSMUST00000020991.14 | -0.407539878 | MGI:1261827 | Dnmt3a        |
| ENSMUST00000103147.4  | -0.406434094 | MGI:1347014 | Psmb3         |
| ENSMUST00000033383.2  | -0.405520809 | MGI:2384312 | Usp11         |
| ENSMUST00000103123.9  | -0.405520809 | MGI:1917720 | Rprd1b        |
| ENSMUST00000035804.8  | -0.405370574 | MGI:105925  | Cdo1          |
| ENSMUST00000021375.11 | -0.403786889 | MGI:1349635 | Sec23a        |
| ENSMUST00000033093.9  | -0.403481156 | MGI:99702   | Bax           |
| ENSMUST00000037748.8  | -0.403481156 | MGI:1858195 | Hnrnpu        |
| ENSMUST00000020008.9  | -0.401588044 | MGI:2149946 | Gopc          |
| ENSMUST00000041401.10 | -0.401588044 | MGI:1921248 | Herc3         |
| ENSMUST00000079490.5  | -0.401588044 | MGI:1859565 | Nap1l3        |
| ENSMUST00000223690.1  | -0.401588044 | MGI:1855699 | Vt1a          |
| ENSMUST00000233645.1  | -0.401588044 | MGI:97837   | Qk            |
| ENSMUST00000025542.9  | -0.401494112 | MGI:2183441 | Psat1         |
| ENSMUST00000018470.9  | -0.401004726 | MGI:1891917 | Ywhab         |
| ENSMUST00000025707.8  | -0.398182503 | MGI:1891017 | Zfpl1         |
| ENSMUST00000027623.8  | -0.398182503 | MGI:109263  | Tsn           |
| ENSMUST00000102661.3  | -0.398182503 | MGI:106611  | Rnf112        |
| ENSMUST00000155282.8  | -0.398182503 | MGI:105976  | Myo5a         |
| ENSMUST00000032413.6  | -0.398131695 | MGI:1922570 | Etnk1         |
| ENSMUST00000065987.13 | -0.398115003 | MGI:2443582 | Abat          |
| ENSMUST00000018691.8  | -0.396645382 | MGI:1934234 | Pip4k2b       |
| ENSMUST00000103225.10 | -0.396645382 | MGI:1917841 | 5730455P16Rik |
| ENSMUST00000166126.6  | -0.396645382 | MGI:1338042 | Pcdh10        |
| ENSMUST00000023707.10 | -0.396612324 | MGI:98351   | Sod1          |
| ENSMUST00000028916.14 | -0.395204819 | MGI:1350925 | Sec23b        |
| ENSMUST00000026122.10 | -0.393851991 | MGI:97464   | P4hb          |
| ENSMUST00000107196.9  | -0.393851991 | MGI:1344351 | Dlg2          |
| ENSMUST00000076454.7  | -0.39342013  | MGI:1860276 | Ubqln1        |
| ENSMUST00000019109.7  | -0.393163084 | MGI:109194  | Ywhah         |
| ENSMUST00000004172.14 | -0.391984839 | MGI:109373  | Hmox2         |
| ENSMUST00000131475.1  | -0.391379321 | MGI:95700   | Ggct          |
| ENSMUST00000045602.8  | -0.390732671 | MGI:1915592 | Ndufb10       |
| ENSMUST00000107924.1  | -0.389235565 | MGI:1916477 | Selenot       |
| ENSMUST00000084526.11 | -0.389175133 | MGI:1333843 | Slc31a1       |
| ENSMUST00000094578.10 | -0.389175133 | MGI:1916412 | Sec31a        |
| ENSMUST00000106267.4  | -0.388206079 | MGI:1930705 | Stx1b         |
| ENSMUST00000029447.11 | -0.388160416 | MGI:1913891 | Sike1         |

|                       |              |             |         |
|-----------------------|--------------|-------------|---------|
| ENSMUST00000034048.12 | -0.387197949 | MGI:1914006 | Cfap97  |
| ENSMUST00000026120.7  | -0.386790746 | MGI:1930001 | Bhlhe22 |
| ENSMUST00000236889.1  | -0.385414416 | MGI:1914659 | Kctd16  |
| ENSMUST00000028398.13 | -0.384947815 | MGI:107412  | Ube2e3  |
| ENSMUST00000232139.1  | -0.383797412 | MGI:109240  | Ube2l3  |
| ENSMUST00000076155.5  | -0.383167401 | MGI:3648653 | Eno1b   |
| ENSMUST00000046945.12 | -0.383044236 | MGI:1261814 | Palm    |
| ENSMUST00000102573.7  | -0.383044236 | MGI:1931835 | Trim44  |
| ENSMUST00000084500.7  | -0.382324653 | MGI:97394   | Oat     |
| ENSMUST00000222404.1  | -0.382324653 | MGI:3582925 | Tes3-ps |
| ENSMUST00000065917.15 | -0.378696725 | MGI:1855693 | Nap1l1  |
| ENSMUST00000045557.9  | -0.377548475 | MGI:1298205 | Slc7a5  |
| ENSMUST00000078139.12 | -0.377548475 | MGI:1914186 | Asph    |
| ENSMUST00000170715.7  | -0.376572157 | MGI:105110  | Rps2    |
| ENSMUST00000003971.9  | -0.376110224 | MGI:1330858 | Lin7b   |
| ENSMUST00000089230.6  | -0.375234274 | MGI:1919228 | Ppp2r2a |
| ENSMUST00000020308.4  | -0.373756656 | MGI:1921997 | Ddit4   |
| ENSMUST00000076354.12 | -0.366014176 | MGI:1298407 | Tspan7  |
| ENSMUST00000004206.9  | -0.364400061 | MGI:1858258 | Eif3g   |
| ENSMUST00000169613.3  | -0.359682826 | MGI:95865   | Gstp1   |
| ENSMUST00000041606.13 | -0.350495169 | MGI:1916602 | Necab1  |
| ENSMUST00000139395.7  | -0.350355356 | MGI:1933548 | Actl6b  |
| ENSMUST00000007212.8  | -0.350335422 | MGI:1096584 | Psmd2   |
| ENSMUST00000049948.5  | -0.350262417 | MGI:1913764 | Asrg1   |
| ENSMUST00000041736.10 | -0.350242784 | MGI:2385252 | Hdac11  |
| ENSMUST00000113607.9  | -0.350232394 | MGI:1858696 | Copg1   |
| ENSMUST00000090553.11 | -0.350160432 | MGI:102809  | Sars    |
| ENSMUST00000026667.14 | -0.350132018 | MGI:1923731 | Eif4a3  |
| ENSMUST00000026506.4  | -0.350116804 | MGI:109638  | Clns1a  |
| ENSMUST00000033184.5  | -0.350100855 | MGI:1336194 | Tpp1    |
| ENSMUST00000046518.11 | -0.350100855 | MGI:2446159 | Itpk1   |
| ENSMUST00000053015.6  | -0.350100855 | MGI:1345635 | Pcbp1   |
| ENSMUST00000131996.7  | -0.350084114 | MGI:1927469 | Rgs17   |
| ENSMUST00000029382.12 | -0.350066523 | MGI:1914988 | Ppid    |
| ENSMUST00000029876.1  | -0.350048014 | MGI:88248   | Calb1   |
| ENSMUST00000227691.1  | -0.350007942 | MGI:1859920 | Ebag9   |
| ENSMUST00000027475.14 | -0.349986205 | MGI:2138584 | Gigyf2  |
| ENSMUST00000044382.6  | -0.349885388 | MGI:2679294 | Zc4h2   |
| ENSMUST00000163785.1  | -0.349885388 | MGI:88396   | Chrm1   |



|                       |              |             |         |
|-----------------------|--------------|-------------|---------|
| ENSMUST00000080299.6  | -0.349856031 | MGI:1914307 | Yaf2    |
| ENSMUST00000109627.7  | -0.349856031 | MGI:3512628 | Cbx6    |
| ENSMUST00000131252.7  | -0.349856031 | MGI:1095403 | Sf1     |
| ENSMUST00000086471.11 | -0.349791103 | MGI:1919204 | Suds3   |
| ENSMUST00000236560.1  | -0.349791103 | MGI:6303291 | Gm50388 |
| ENSMUST00000022639.7  | -0.349755077 | MGI:97313   | Nefl    |
| ENSMUST00000026324.9  | -0.349755077 | MGI:1928939 | Acot9   |
| ENSMUST00000099735.5  | -0.349755077 | MGI:1914258 | Yae1d1  |
| ENSMUST00000172164.9  | -0.349755077 | MGI:2146512 | Slc7a4  |
| ENSMUST00000029666.13 | -0.349716317 | MGI:1330587 | Papss1  |
| ENSMUST00000076615.5  | -0.349716317 | MGI:2142523 | Crtc1   |
| ENSMUST00000038379.4  | -0.349674498 | MGI:1917826 | Cpsf7   |
| ENSMUST00000049411.11 | -0.349674498 | MGI:88042   | Apex1   |
| ENSMUST00000076670.2  | -0.349674498 | MGI:2445015 | Plppr1  |
| ENSMUST00000013807.7  | -0.349629244 | MGI:109583  | Pten    |
| ENSMUST00000022164.15 | -0.349629244 | MGI:1915808 | Ankra2  |
| ENSMUST00000033824.7  | -0.349629244 | MGI:96745   | Lamp1   |
| ENSMUST00000052556.4  | -0.349629244 | MGI:1917816 | Abhd17b |
| ENSMUST00000055704.11 | -0.349629244 | MGI:95772   | Gnai2   |
| ENSMUST00000028238.14 | -0.349580114 | MGI:1915615 | Rab14   |
| ENSMUST00000053087.3  | -0.349580114 | MGI:2683536 | Klhl23  |
| ENSMUST00000062213.12 | -0.349580114 | MGI:2137679 | Sfxn3   |
| ENSMUST00000065957.6  | -0.349580114 | MGI:1926368 | Syt5    |
| ENSMUST00000172107.7  | -0.349580114 | MGI:1917606 | St13    |
| ENSMUST00000232437.1  | -0.349580114 | MGI:1345181 | Paccin1 |
| ENSMUST00000009679.10 | -0.349526586 | MGI:1915147 | Rnmt    |
| ENSMUST00000109523.1  | -0.349526586 | MGI:2685537 | Vstm2l  |
| ENSMUST00000114839.7  | -0.349526586 | MGI:1344381 | Dnajb6  |
| ENSMUST00000118199.7  | -0.349526586 | MGI:1915148 | Pef1    |
| ENSMUST00000150268.7  | -0.349526586 | MGI:1858197 | Plrg1   |
| ENSMUST00000165123.7  | -0.349526586 | MGI:1934950 | Csnk1a1 |
| ENSMUST00000000260.12 | -0.349468042 | MGI:1913605 | Gmpr    |
| ENSMUST00000024748.13 | -0.349468042 | MGI:1860138 | Gtpbp2  |
| ENSMUST00000050328.14 | -0.349468042 | MGI:1349431 | Eif2s3x |
| ENSMUST00000056034.12 | -0.349468042 | MGI:1913869 | Atat1   |
| ENSMUST00000060904.10 | -0.349468042 | MGI:1913354 | Tceal3  |
| ENSMUST00000063574.6  | -0.349468042 | MGI:1915577 | Tsr3    |
| ENSMUST00000064571.10 | -0.349468042 | MGI:1917542 | Afap1   |
| ENSMUST00000072113.5  | -0.349468042 | MGI:1922118 | Tmem65  |

|                       |              |             |          |
|-----------------------|--------------|-------------|----------|
| ENSMUST00000115645.9  | -0.349468042 | MGI:96269   | Ranbp1   |
| ENSMUST00000210640.1  | -0.349468042 | MGI:98003   | Rpl18    |
| ENSMUST00000023294.14 | -0.349403744 | MGI:1915958 | Rabl2    |
| ENSMUST00000023818.10 | -0.349403744 | MGI:1914738 | Calcoco1 |
| ENSMUST00000025408.9  | -0.349403744 | MGI:1916847 | Afg3l2   |
| ENSMUST00000028977.6  | -0.349403744 | MGI:107688  | Kif3b    |
| ENSMUST00000045004.10 | -0.349403744 | MGI:1917278 | Dop1b    |
| ENSMUST00000050516.13 | -0.349403744 | MGI:1916340 | Ascc1    |
| ENSMUST00000084770.4  | -0.349403744 | MGI:1330859 | Fut9     |
| ENSMUST00000161204.7  | -0.349403744 | MGI:102581  | Rdh11    |
| ENSMUST00000162364.7  | -0.349403744 | MGI:104899  | Mob4     |
| ENSMUST00000021689.13 | -0.349332799 | MGI:1194884 | Evl      |
| ENSMUST00000046770.9  | -0.349332799 | MGI:1913458 | Nenf     |
| ENSMUST00000067081.9  | -0.349332799 | MGI:88353   | Cdk11b   |
| ENSMUST00000084524.3  | -0.349332799 | MGI:1917302 | Prpf4    |
| ENSMUST00000103099.7  | -0.349332799 | MGI:108498  | Nbr1     |
| ENSMUST00000122965.7  | -0.349332799 | MGI:1925016 | Elp4     |
| ENSMUST00000153183.7  | -0.349332799 | MGI:1351652 | Tbl2     |
| ENSMUST00000009174.14 | -0.34925412  | MGI:1914716 | Pdcl     |
| ENSMUST00000038422.7  | -0.34925412  | MGI:2442463 | Irf2bpl  |
| ENSMUST00000049977.12 | -0.34925412  | MGI:1352748 | Dpf1     |
| ENSMUST00000056403.6  | -0.34925412  | MGI:2685307 | H1f10    |
| ENSMUST00000058981.2  | -0.34925412  | MGI:107633  | Lxn      |
| ENSMUST0000000080.7   | -0.34916637  | MGI:1346318 | Klf6     |
| ENSMUST00000007253.5  | -0.34916637  | MGI:97305   | Neu1     |
| ENSMUST00000026896.9  | -0.34916637  | MGI:106020  | St8sia2  |
| ENSMUST00000029336.5  | -0.34916637  | MGI:1919412 | Dhx36    |
| ENSMUST00000034983.6  | -0.34916637  | MGI:107788  | Atp1b3   |
| ENSMUST00000069106.4  | -0.34916637  | MGI:1341085 | Epm2a    |
| ENSMUST00000078944.12 | -0.34916637  | MGI:1918248 | Phf6     |
| ENSMUST00000096441.4  | -0.34916637  | MGI:1921772 | Morc2a   |
| ENSMUST00000114726.7  | -0.34916637  | MGI:1343044 | Rbmx     |
| ENSMUST00000151224.2  | -0.34916637  | MGI:1926106 | Fam163b  |
| ENSMUST00000051100.6  | -0.34916637  | NA          | NA       |
| ENSMUST00000000001.4  | -0.349067883 | MGI:95773   | Gnai3    |
| ENSMUST00000026937.11 | -0.349067883 | MGI:1913633 | Iscu     |
| ENSMUST00000032715.12 | -0.349067883 | MGI:1919224 | Prmt3    |
| ENSMUST00000049997.13 | -0.349067883 | MGI:2181363 | Prokr2   |
| ENSMUST00000058162.13 | -0.349067883 | MGI:96911   | Mafg     |

|                       |              |             |         |
|-----------------------|--------------|-------------|---------|
| ENSMUST00000060442.13 | -0.349067883 | MGI:1927851 | Gpr85   |
| ENSMUST00000061280.16 | -0.349067883 | MGI:2441773 | Pcmttd1 |
| ENSMUST00000062957.7  | -0.349067883 | MGI:2144724 | Ttc7b   |
| ENSMUST00000072451.10 | -0.349067883 | MGI:2444530 | Slc9a7  |
| ENSMUST00000121153.7  | -0.349067883 | MGI:1342291 | Rlim    |
| ENSMUST00000162517.7  | -0.349067883 | MGI:1920094 | Kctd17  |
| ENSMUST00000218004.1  | -0.349067883 | MGI:1920442 | Xpot    |
| ENSMUST00000008748.7  | -0.34895656  | MGI:2150152 | Ubqln4  |
| ENSMUST00000018727.3  | -0.34895656  | MGI:1351465 | G3bp1   |
| ENSMUST00000024885.9  | -0.34895656  | MGI:109386  | Cebpz   |
| ENSMUST00000026428.3  | -0.34895656  | MGI:1917789 | Myl6b   |
| ENSMUST00000034827.9  | -0.34895656  | MGI:1916119 | Imp3    |
| ENSMUST00000040008.3  | -0.34895656  | MGI:1914865 | Ube2r2  |
| ENSMUST00000055946.7  | -0.34895656  | MGI:2441697 | Gpr158  |
| ENSMUST00000064062.12 | -0.34895656  | MGI:1923864 | Immt    |
| ENSMUST00000102997.7  | -0.34895656  | MGI:1858199 | Ccnc    |
| ENSMUST00000111178.1  | -0.34895656  | MGI:2444851 | Efr3b   |
| ENSMUST00000115733.2  | -0.34895656  | MGI:2660877 | Gucy1a2 |
| ENSMUST00000169611.3  | -0.34895656  | MGI:97239   | Mmut    |
| ENSMUST00000179549.2  | -0.34895656  | MGI:2147607 | Ccdc85b |
| ENSMUST00000217267.1  | -0.34895656  | MGI:2180854 | Rfxap   |
| ENSMUST00000002099.10 | -0.348829718 | MGI:1923818 | Ift46   |
| ENSMUST00000002885.7  | -0.348829718 | MGI:2145369 | Epdr1   |
| ENSMUST00000016553.4  | -0.348829718 | MGI:1914300 | Nkap    |
| ENSMUST00000016680.13 | -0.348829718 | MGI:1914487 | Cul4a   |
| ENSMUST00000019931.11 | -0.348829718 | MGI:2442989 | Lrp11   |
| ENSMUST00000022196.4  | -0.348829718 | MGI:1333879 | Ap3b1   |
| ENSMUST00000027123.14 | -0.348829718 | MGI:96242   | Hspd1   |
| ENSMUST00000029575.11 | -0.348829718 | MGI:1889574 | Extl2   |
| ENSMUST00000033727.13 | -0.348829718 | MGI:1933185 | Ctps2   |
| ENSMUST00000038166.8  | -0.348829718 | MGI:2147067 | Dhx57   |
| ENSMUST00000047057.8  | -0.348829718 | MGI:4820566 | Gm17018 |
| ENSMUST00000047521.6  | -0.348829718 | MGI:2139134 | Cercam  |
| ENSMUST00000048421.13 | -0.348829718 | MGI:2385896 | Map11   |
| ENSMUST00000049740.2  | -0.348829718 | MGI:1927290 | Zbtb33  |
| ENSMUST00000056508.11 | -0.348829718 | MGI:103555  | Clcn3   |
| ENSMUST00000076110.10 | -0.348829718 | MGI:1101759 | Rnf2    |
| ENSMUST00000095263.9  | -0.348829718 | MGI:106280  | Yipf3   |
| ENSMUST00000103081.9  | -0.348829718 | MGI:1098667 | Adam11  |

|                       |              |             |          |
|-----------------------|--------------|-------------|----------|
| ENSMUST00000109260.2  | -0.348829718 | MGI:2144243 | Clint1   |
| ENSMUST00000111325.4  | -0.348829718 | MGI:1916876 | Sdr39u1  |
| ENSMUST00000127698.7  | -0.348829718 | MGI:1339946 | Tbpl1    |
| ENSMUST00000167549.1  | -0.348829718 | MGI:1919196 | Endod1   |
| ENSMUST00000177633.7  | -0.348829718 | MGI:1918025 | Zmynd8   |
| ENSMUST00000017384.13 | -0.348683868 | MGI:2179723 | Casc3    |
| ENSMUST00000023099.7  | -0.348683868 | MGI:1915010 | Slc38a2  |
| ENSMUST00000028341.10 | -0.348683868 | MGI:2139135 | Anapc2   |
| ENSMUST00000028536.12 | -0.348683868 | MGI:1926020 | Arl14ep  |
| ENSMUST00000029199.10 | -0.348683868 | MGI:1195270 | Zmat3    |
| ENSMUST00000032963.9  | -0.348683868 | MGI:1919840 | Ppme1    |
| ENSMUST00000033875.9  | -0.348683868 | MGI:1891207 | Plpbp    |
| ENSMUST00000041374.7  | -0.348683868 | MGI:2444484 | Manea    |
| ENSMUST00000042750.2  | -0.348683868 | MGI:1914313 | Tmem246  |
| ENSMUST00000044113.11 | -0.348683868 | MGI:2446632 | Ago2     |
| ENSMUST00000086559.6  | -0.348683868 | MGI:2444823 | Slc41a1  |
| ENSMUST00000094434.12 | -0.348683868 | MGI:95589   | Ftl1     |
| ENSMUST00000105851.8  | -0.348683868 | MGI:1913443 | Pithd1   |
| ENSMUST00000113360.7  | -0.348683868 | MGI:107438  | Cab39    |
| ENSMUST00000131309.2  | -0.348683868 | MGI:108476  | Fzd3     |
| ENSMUST00000140901.7  | -0.348683868 | MGI:1926790 | Fzr1     |
| ENSMUST00000160597.7  | -0.348683868 | MGI:1921393 | Opa1     |
| ENSMUST00000170883.7  | -0.348683868 | MGI:99256   | Hdlbp    |
| ENSMUST00000202406.3  | -0.348683868 | MGI:102788  | Rph3a    |
| ENSMUST00000221368.1  | -0.348683868 | MGI:1917623 | Gpatch2l |
| ENSMUST00000001202.14 | -0.348514392 | MGI:109589  | Ocrl     |
| ENSMUST00000015333.11 | -0.348514392 | MGI:2384865 | Casd1    |
| ENSMUST00000019945.14 | -0.348514392 | MGI:1929646 | Pex3     |
| ENSMUST00000026408.6  | -0.348514392 | MGI:1338027 | Gdf11    |
| ENSMUST00000028763.9  | -0.348514392 | MGI:104294  | Tyro3    |
| ENSMUST00000035350.11 | -0.348514392 | MGI:1923012 | Aftph    |
| ENSMUST00000035934.6  | -0.348514392 | MGI:2443972 | Exoc3    |
| ENSMUST00000042608.7  | -0.348514392 | MGI:87873   | Acd      |
| ENSMUST00000042614.12 | -0.348514392 | MGI:3647820 | Hectd4   |
| ENSMUST00000042661.7  | -0.348514392 | MGI:1925589 | Ttyh3    |
| ENSMUST00000048657.9  | -0.348514392 | MGI:1919746 | Sec24c   |
| ENSMUST00000061882.9  | -0.348514392 | MGI:2388651 | Mcat     |
| ENSMUST00000069250.13 | -0.348514392 | MGI:99204   | Zfp57    |
| ENSMUST00000090558.9  | -0.348514392 | MGI:1858235 | Celsr2   |

|                       |              |             |          |
|-----------------------|--------------|-------------|----------|
| ENSMUST00000110648.7  | -0.348514392 | MGI:1351320 | Trp53bp1 |
| ENSMUST00000121927.7  | -0.348514392 | MGI:1315213 | Nrip1    |
| ENSMUST00000130044.1  | -0.348514392 | MGI:1099446 | Synpo    |
| ENSMUST00000165978.2  | -0.348514392 | MGI:2144865 | Tecpr2   |
| ENSMUST00000198254.4  | -0.348514392 | MGI:1859730 | Sh3glb1  |
| ENSMUST00000201203.3  | -0.348514392 | MGI:1916046 | Tmem214  |
| ENSMUST00000215420.1  | -0.348514392 | MGI:1316650 | Slc37a4  |
| ENSMUST00000000641.14 | -0.348315041 | MGI:1340055 | Sema4f   |
| ENSMUST00000001412.16 | -0.348315041 | MGI:1920538 | Vps50    |
| ENSMUST00000006991.8  | -0.348315041 | MGI:1096392 | Hcn1     |
| ENSMUST00000016696.12 | -0.348315041 | MGI:106315  | Foxred2  |
| ENSMUST00000022224.15 | -0.348315041 | MGI:1914225 | Trappc13 |
| ENSMUST00000022819.12 | -0.348315041 | MGI:2443113 | Jph4     |
| ENSMUST00000023913.10 | -0.348315041 | MGI:2136882 | Get1     |
| ENSMUST00000026243.4  | -0.348315041 | MGI:1932139 | Oga      |
| ENSMUST00000028160.14 | -0.348315041 | MGI:1915913 | Slc25a25 |
| ENSMUST00000029773.12 | -0.348315041 | MGI:1919244 | Cnn3     |
| ENSMUST00000031695.14 | -0.348315041 | MGI:1920428 | Wasl     |
| ENSMUST00000032179.13 | -0.348315041 | MGI:1859555 | Nup210   |
| ENSMUST00000035991.7  | -0.348315041 | MGI:2179809 | Bivm     |
| ENSMUST00000045270.14 | -0.348315041 | MGI:1333833 | Cbfa2t2  |
| ENSMUST00000049822.9  | -0.348315041 | MGI:1923028 | Them4    |
| ENSMUST00000057717.7  | -0.348315041 | MGI:1890618 | Zfp319   |
| ENSMUST00000067567.4  | -0.348315041 | MGI:1347000 | Lypla2   |
| ENSMUST00000075448.12 | -0.348315041 | MGI:108056  | Nfia     |
| ENSMUST00000091259.8  | -0.348315041 | MGI:3040688 | Slc7a14  |
| ENSMUST00000093321.11 | -0.348315041 | MGI:103232  | Grb10    |
| ENSMUST00000099090.6  | -0.348315041 | MGI:1919283 | Tsc22d2  |
| ENSMUST00000103064.9  | -0.348315041 | MGI:1919045 | Pitpnc1  |
| ENSMUST00000103133.3  | -0.348315041 | MGI:1927347 | Smarce1  |
| ENSMUST00000106657.7  | -0.348315041 | MGI:2652838 | Zfyve9   |
| ENSMUST00000109553.9  | -0.348315041 | MGI:98663   | Tef      |
| ENSMUST00000110255.7  | -0.348315041 | MGI:1920175 | Marchf1  |
| ENSMUST00000111546.7  | -0.348315041 | MGI:1194500 | Ablim1   |
| ENSMUST00000112115.1  | -0.348315041 | MGI:106911  | Hccs     |
| ENSMUST00000120796.7  | -0.348315041 | MGI:3036273 | Kcnt2    |
| ENSMUST00000161263.7  | -0.348315041 | MGI:1922459 | Sv2c     |
| ENSMUST00000178687.1  | -0.348315041 | MGI:2136977 | Tmem121b |
| ENSMUST00000179636.2  | -0.348315041 | MGI:2143484 | Slc6a15  |

|                       |              |             |               |
|-----------------------|--------------|-------------|---------------|
| ENSMUST00000238290.1  | -0.348315041 | MGI:1920082 | Crtac1        |
| ENSMUST00000005841.15 | -0.348077155 | MGI:109447  | Ctcf          |
| ENSMUST00000006893.8  | -0.348077155 | MGI:3036268 | D130043K22Rik |
| ENSMUST00000011450.7  | -0.348077155 | MGI:1917866 | Sugp1         |
| ENSMUST00000020490.12 | -0.348077155 | MGI:1924555 | Wdr82         |
| ENSMUST00000021898.5  | -0.348077155 | MGI:106179  | Shc3          |
| ENSMUST00000022358.8  | -0.348077155 | MGI:1919156 | Zswim8        |
| ENSMUST00000025393.13 | -0.348077155 | MGI:894293  | Smad4         |
| ENSMUST00000025486.8  | -0.348077155 | MGI:96795   | Lmnbl1        |
| ENSMUST00000027797.8  | -0.348077155 | MGI:1914709 | Nvl           |
| ENSMUST00000030340.14 | -0.348077155 | MGI:98254   | Scp2          |
| ENSMUST00000032410.13 | -0.348077155 | MGI:1915724 | Tada3         |
| ENSMUST00000033992.8  | -0.348077155 | MGI:95804   | Gsr           |
| ENSMUST00000038627.8  | -0.348077155 | MGI:104854  | Zfp91         |
| ENSMUST00000043349.6  | -0.348077155 | MGI:95812   | Grid1         |
| ENSMUST00000056237.14 | -0.348077155 | MGI:2142651 | Prmt9         |
| ENSMUST00000058578.7  | -0.348077155 | MGI:1918054 | Pgrmc2        |
| ENSMUST00000068301.10 | -0.348077155 | MGI:2139793 | Cept1         |
| ENSMUST00000077477.11 | -0.348077155 | MGI:1860085 | Stk19         |
| ENSMUST00000102574.9  | -0.348077155 | MGI:895149  | Acadvl        |
| ENSMUST00000105502.7  | -0.348077155 | MGI:1890081 | Foxo3         |
| ENSMUST00000105778.7  | -0.348077155 | MGI:107628  | Prdm2         |
| ENSMUST00000106061.8  | -0.348077155 | MGI:1921898 | S100pbp       |
| ENSMUST00000113462.7  | -0.348077155 | MGI:1096362 | Nrxn2         |
| ENSMUST00000118831.7  | -0.348077155 | MGI:99665   | Syt3          |
| ENSMUST00000121390.7  | -0.348077155 | MGI:109482  | Cacna1a       |
| ENSMUST00000143400.7  | -0.348077155 | MGI:1925791 | Asb8          |
| ENSMUST00000151477.7  | -0.348077155 | MGI:3648294 | Tnrc18        |
| ENSMUST00000162751.7  | -0.348077155 | MGI:1352508 | Stau2         |
| ENSMUST00000165838.8  | -0.348077155 | MGI:1917333 | Metrn         |
| ENSMUST00000168381.7  | -0.348077155 | MGI:1916417 | Ppp1r12b      |
| ENSMUST00000170792.8  | -0.348077155 | MGI:1346863 | Mapk10        |
| ENSMUST00000183663.7  | -0.348077155 | MGI:96560   | Ilf6st        |
| ENSMUST00000193404.1  | -0.348077155 | MGI:1935227 | Pcdhga10      |
| ENSMUST00000229441.1  | -0.348077155 | MGI:3608416 | Elfn2         |
| ENSMUST00000003947.8  | -0.347788363 | MGI:103187  | Nqo1          |
| ENSMUST00000005057.6  | -0.347788363 | MGI:1354165 | Thop1         |
| ENSMUST00000018805.14 | -0.347788363 | MGI:1333873 | Cog1          |
| ENSMUST00000021824.7  | -0.347788363 | MGI:1918180 | Nol8          |

|                       |              |             |               |
|-----------------------|--------------|-------------|---------------|
| ENSMUST00000022419.6  | -0.347788363 | MGI:2145814 | Ppif          |
| ENSMUST00000023562.8  | -0.347788363 | MGI:1913914 | Tmem41a       |
| ENSMUST00000023758.8  | -0.347788363 | MGI:1194915 | Asic1         |
| ENSMUST00000024575.7  | -0.347788363 | MGI:1342290 | Rps6ka2       |
| ENSMUST00000025910.12 | -0.347788363 | MGI:1096330 | Bad           |
| ENSMUST00000026671.12 | -0.347788363 | MGI:1921620 | Rptor         |
| ENSMUST00000028049.12 | -0.347788363 | MGI:1352507 | Rabgap1l      |
| ENSMUST00000031289.6  | -0.347788363 | MGI:1917368 | Srrd          |
| ENSMUST00000031740.15 | -0.347788363 | MGI:106477  | Mepce         |
| ENSMUST00000032071.12 | -0.347788363 | MGI:1919352 | Dusp11        |
| ENSMUST00000033086.7  | -0.347788363 | MGI:1916211 | Phkg2         |
| ENSMUST00000033965.13 | -0.347788363 | MGI:1345183 | Tenm3         |
| ENSMUST00000034720.11 | -0.347788363 | MGI:107282  | Polr2m        |
| ENSMUST00000034945.5  | -0.347788363 | MGI:1915500 | Ciao2a        |
| ENSMUST00000035661.6  | -0.347788363 | MGI:2153093 | Cspg4         |
| ENSMUST00000039750.6  | -0.347788363 | MGI:2180196 | Lgi2          |
| ENSMUST00000041733.8  | -0.347788363 | MGI:2443028 | Taf2          |
| ENSMUST00000044207.4  | -0.347788363 | MGI:1309453 | Sart1         |
| ENSMUST00000047247.11 | -0.347788363 | MGI:2442663 | Hectd2        |
| ENSMUST00000048377.10 | -0.347788363 | MGI:2138346 | Suco          |
| ENSMUST00000050211.6  | -0.347788363 | MGI:1913266 | Tk2           |
| ENSMUST00000053959.6  | -0.347788363 | MGI:1202397 | Ints6         |
| ENSMUST00000057272.14 | -0.347788363 | MGI:2444631 | 4932438A13Rik |
| ENSMUST00000060077.6  | -0.347788363 | MGI:104841  | Cpox          |
| ENSMUST00000060992.5  | -0.347788363 | MGI:1915835 | Rtn4          |
| ENSMUST00000065932.13 | -0.347788363 | MGI:1859616 | Gripap1       |
| ENSMUST00000066149.8  | -0.347788363 | MGI:1935221 | Pcdhga8       |
| ENSMUST00000067880.12 | -0.347788363 | MGI:109548  | Adam10        |
| ENSMUST00000072031.12 | -0.347788363 | MGI:1349438 | Mprip         |
| ENSMUST00000073957.7  | -0.347788363 | MGI:1340034 | Sema3e        |
| ENSMUST00000079121.3  | -0.347788363 | MGI:1914931 | Mrpl18        |
| ENSMUST00000084891.4  | -0.347788363 | MGI:1924399 | Pacs2         |
| ENSMUST00000087321.3  | -0.347788363 | MGI:1858229 | Ppp1r3c       |
| ENSMUST00000090680.10 | -0.347788363 | MGI:1858415 | Ddx20         |
| ENSMUST00000093450.5  | -0.347788363 | MGI:2687327 | Ano8          |
| ENSMUST00000098444.8  | -0.347788363 | MGI:1927223 | Pard6a        |
| ENSMUST00000098789.4  | -0.347788363 | MGI:2682314 | Zc3h4         |
| ENSMUST00000101191.9  | -0.347788363 | MGI:1919028 | Klh5          |
| ENSMUST00000102729.9  | -0.347788363 | MGI:104583  | Eps15         |

|                       |              |             |          |
|-----------------------|--------------|-------------|----------|
| ENSMUST00000102799.9  | -0.347788363 | MGI:1100887 | Elavl2   |
| ENSMUST00000103111.8  | -0.347788363 | MGI:2444772 | Zhx3     |
| ENSMUST00000105646.2  | -0.347788363 | MGI:2685419 | Ajap1    |
| ENSMUST00000108022.7  | -0.347788363 | MGI:2444848 | Pthr2    |
| ENSMUST00000109426.2  | -0.347788363 | MGI:1346016 | Arhgef28 |
| ENSMUST00000112819.8  | -0.347788363 | MGI:2147870 | Lrch2    |
| ENSMUST00000113952.9  | -0.347788363 | MGI:2155884 | Wdr5     |
| ENSMUST00000119142.7  | -0.347788363 | MGI:104771  | Erbp4    |
| ENSMUST00000125871.7  | -0.347788363 | MGI:2145310 | Rnf44    |
| ENSMUST00000129321.1  | -0.347788363 | MGI:1915359 | Rnf227   |
| ENSMUST00000130300.2  | -0.347788363 | MGI:2445053 | Ccbe1    |
| ENSMUST00000135431.7  | -0.347788363 | MGI:2442636 | Lrrc4c   |
| ENSMUST00000159405.2  | -0.347788363 | MGI:104692  | Pcdh1    |
| ENSMUST00000164099.2  | -0.347788363 | MGI:1921581 | Snx19    |
| ENSMUST00000168621.2  | -0.347788363 | MGI:104574  | Ptprj    |
| ENSMUST00000177978.2  | -0.347788363 | MGI:3714351 | Fam177a2 |
| ENSMUST00000191428.6  | -0.347788363 | MGI:109168  | Fat1     |
| ENSMUST00000194418.1  | -0.347788363 | MGI:1935216 | Pcdhga4  |
| ENSMUST00000208247.2  | -0.347788363 | MGI:105376  | Adam9    |
| ENSMUST00000210279.1  | -0.347788363 | MGI:2684420 | Dcaf15   |
| ENSMUST00000236152.1  | -0.347788363 | MGI:1345278 | Slc29a2  |
| ENSMUST00000237592.1  | -0.347788363 | MGI:4937091 | Snhg4    |
| ENSMUST00000237592.1  | -0.347788363 | MGI:4937091 | Snhg4    |
| ENSMUST00000237592.1  | -0.347788363 | MGI:4937091 | Snhg4    |
| ENSMUST00000237592.1  | -0.347788363 | MGI:4937091 | Snhg4    |
| ENSMUST00000071135.5  | -0.337673562 | MGI:107848  | Tubb4a   |
| ENSMUST00000019649.3  | -0.33719953  | MGI:98888   | Ubb      |
| ENSMUST00000020608.2  | -0.336588812 | MGI:1321159 | Ppp2ca   |
| ENSMUST00000069520.10 | -0.331386464 | MGI:98467   | Syp      |
| ENSMUST00000034097.7  | -0.328775778 | MGI:95792   | Got2     |
| ENSMUST00000084882.8  | -0.327586524 | MGI:1915587 | Crip2    |
| ENSMUST00000102645.3  | -0.325784724 | MGI:1914234 | Med19    |
| ENSMUST00000044911.9  | -0.323463952 | MGI:1891731 | Stub1    |
| ENSMUST00000072359.7  | -0.323380804 | MGI:99705   | Tpm3-rs7 |
| ENSMUST00000102683.10 | -0.322410296 | MGI:2443306 | Tom1l2   |
| ENSMUST00000002818.8  | -0.321705403 | MGI:1927550 | Ykt6     |
| ENSMUST00000008812.8  | -0.321272078 | MGI:98146   | Rps18    |
| ENSMUST00000005647.3  | -0.321152163 | MGI:1915599 | Ndufs3   |
| ENSMUST00000017458.10 | -0.320038695 | MGI:1858257 | Mpp2     |



|                       |              |             |            |
|-----------------------|--------------|-------------|------------|
| ENSMUST00000032078.8  | -0.319626474 | MGI:107184  | Cct7       |
| ENSMUST00000106008.2  | -0.319382506 | MGI:2387178 | Gatd1      |
| ENSMUST00000103124.10 | -0.318697688 | MGI:1261831 | Hap1       |
| ENSMUST00000069580.11 | -0.317982325 | MGI:1913760 | Rnf181     |
| ENSMUST00000109587.8  | -0.317234328 | MGI:2157953 | Rbm39      |
| ENSMUST00000109636.10 | -0.317234328 | MGI:1929472 | Uqcc1      |
| ENSMUST00000026196.13 | -0.317176331 | MGI:95791   | Got1       |
| ENSMUST00000109701.9  | -0.31645141  | MGI:97850   | Raly       |
| ENSMUST00000001569.14 | -0.31643376  | MGI:1100500 | Flot1      |
| ENSMUST00000085374.6  | -0.31588355  | MGI:1920211 | Slc17a7    |
| ENSMUST00000003461.14 | -0.314770552 | MGI:1098267 | Ogdh       |
| ENSMUST00000031779.16 | -0.314770552 | MGI:1097158 | Calu       |
| ENSMUST00000117831.7  | -0.314770552 | MGI:109622  | Aip        |
| ENSMUST00000165563.7  | -0.313866838 | MGI:2384909 | Micu1      |
| ENSMUST00000020285.9  | -0.313172467 | MGI:98230   | Sar1a      |
| ENSMUST00000172818.7  | -0.313108211 | MGI:2159342 | Pja2       |
| ENSMUST00000196745.4  | -0.311499298 | MGI:1330861 | Dclk1      |
| ENSMUST00000114840.1  | -0.310335984 | MGI:98747   | Thy1       |
| ENSMUST00000174064.8  | -0.310181329 | MGI:88057   | Apoe       |
| ENSMUST00000029082.8  | -0.30974767  | MGI:1347070 | Psma7      |
| ENSMUST00000201948.3  | -0.30974767  | MGI:1918771 | Pds5a      |
| ENSMUST00000103008.11 | -0.308858861 | MGI:1337026 | Sdcbp      |
| ENSMUST00000036734.5  | -0.308570085 | MGI:1914947 | Gadd45gip1 |
| ENSMUST00000038558.8  | -0.308570085 | MGI:2153049 | Klf16      |
| ENSMUST00000029708.7  | -0.307322901 | MGI:2180167 | Naxe       |
| ENSMUST00000051209.10 | -0.307322901 | MGI:104748  | Peg3       |
| ENSMUST00000063814.14 | -0.307322901 | MGI:1347054 | Gnpda1     |
| ENSMUST00000107366.1  | -0.307322901 | MGI:1917057 | Trim32     |
| ENSMUST00000111535.7  | -0.307145737 | MGI:2442933 | Amn1       |
| ENSMUST00000030125.4  | -0.305999758 | MGI:108047  | Bag1       |
| ENSMUST00000031613.10 | -0.305999758 | MGI:2385237 | Aimp2      |
| ENSMUST00000101087.9  | -0.305999758 | MGI:1333795 | Srp72      |
| ENSMUST00000103139.10 | -0.305999758 | MGI:98742   | Thra       |
| ENSMUST00000025804.6  | -0.30575196  | MGI:1923558 | Rab1b      |
| ENSMUST00000030935.9  | -0.305496911 | MGI:1913719 | Prxl2b     |
| ENSMUST00000080926.12 | -0.305329547 | MGI:95393   | Eno1       |
| ENSMUST00000122026.5  | -0.304593498 | MGI:1934604 | Lias       |
| ENSMUST00000029131.10 | -0.303096036 | MGI:1913385 | Ggt7       |
| ENSMUST00000096243.6  | -0.303096036 | MGI:1919977 | B3gat3     |

|                       |              |             |          |
|-----------------------|--------------|-------------|----------|
| ENSMUST00000027810.13 | -0.301681356 | MGI:95530   | Fh1      |
| ENSMUST00000099490.2  | -0.301498201 | MGI:1276545 | Nsd1     |
| ENSMUST00000025851.3  | -0.300839749 | MGI:1922471 | Dpp3     |
| ENSMUST00000020962.11 | -0.299789548 | MGI:2442310 | Ubxn2a   |
| ENSMUST00000221972.1  | -0.299789548 | MGI:2443413 | Rps6kl1  |
| ENSMUST00000059844.12 | -0.297958136 | MGI:1919279 | Cnpy3    |
| ENSMUST00000072287.11 | -0.297958136 | MGI:1334433 | Pi4kb    |
| ENSMUST00000084124.6  | -0.297958136 | MGI:97553   | Pgd      |
| ENSMUST00000032479.10 | -0.295990238 | MGI:2441908 | Pianp    |
| ENSMUST00000074208.5  | -0.295990238 | MGI:1913956 | Ndufaf3  |
| ENSMUST00000179001.7  | -0.295990238 | MGI:108563  | Sirpa    |
| ENSMUST00000001416.7  | -0.295114605 | MGI:108087  | Hars     |
| ENSMUST00000159616.1  | -0.295114605 | MGI:2389173 | Lrrtm1   |
| ENSMUST00000124444.1  | -0.29481263  | MGI:1929898 | Cend1    |
| ENSMUST00000022264.12 | -0.293870006 | MGI:97814   | Ptprg    |
| ENSMUST00000037947.14 | -0.293870006 | MGI:101769  | Mcl1     |
| ENSMUST00000045368.11 | -0.293870006 | MGI:2677850 | Abitram  |
| ENSMUST00000066888.9  | -0.293870006 | MGI:1923402 | Utp18    |
| ENSMUST00000112173.7  | -0.293870006 | MGI:1924558 | Tspan9   |
| ENSMUST00000123853.8  | -0.293870006 | MGI:2684060 | Akap11   |
| ENSMUST00000164465.2  | -0.293870006 | MGI:106586  | Omg      |
| ENSMUST00000227061.1  | -0.293870006 | MGI:1860443 | Rabggta  |
| ENSMUST00000023873.11 | -0.291579037 | MGI:1351645 | Prmt5    |
| ENSMUST00000024594.8  | -0.291579037 | MGI:1915512 | Agpat4   |
| ENSMUST00000061826.2  | -0.291579037 | MGI:1349405 | B3galnt1 |
| ENSMUST00000065887.13 | -0.291579037 | MGI:1919570 | Kifbp    |
| ENSMUST00000094467.5  | -0.291579037 | MGI:1202295 | Entpd6   |
| ENSMUST00000109135.8  | -0.291579037 | MGI:1353621 | Zfp354c  |
| ENSMUST00000180036.7  | -0.291579037 | MGI:109433  | Oaz1     |
| ENSMUST00000027370.12 | -0.289234754 | MGI:1930773 | Pnkd     |
| ENSMUST00000068856.4  | -0.289095838 | MGI:1913319 | Snupn    |
| ENSMUST00000094693.10 | -0.289095838 | MGI:98287   | Srsf5    |
| ENSMUST00000101070.4  | -0.287973239 | MGI:1915017 | Jagn1    |
| ENSMUST00000109420.9  | -0.287906474 | MGI:2385163 | Gdap1l1  |
| ENSMUST00000039784.11 | -0.286395151 | MGI:2148491 | Acaa1a   |
| ENSMUST00000067230.5  | -0.286395151 | MGI:98366   | Sox4     |
| ENSMUST00000082428.4  | -0.286395151 | MGI:108388  | Sephs2   |
| ENSMUST00000225355.1  | -0.286395151 | MGI:1921445 | Elp3     |
| ENSMUST00000047864.10 | -0.28467423  | MGI:95288   | Eef2     |

|                       |              |             |          |
|-----------------------|--------------|-------------|----------|
| ENSMUST00000032992.6  | -0.284141111 | MGI:1926966 | Eif3c    |
| ENSMUST00000112138.7  | -0.283589642 | MGI:107750  | Dync1i2  |
| ENSMUST00000130411.6  | -0.283553719 | MGI:1915246 | Srsf6    |
| ENSMUST00000023043.9  | -0.28344709  | MGI:103202  | Adsl     |
| ENSMUST00000025127.4  | -0.28344709  | MGI:106271  | Mapre2   |
| ENSMUST00000028162.4  | -0.28344709  | MGI:1917592 | Ptges2   |
| ENSMUST00000028377.13 | -0.28344709  | MGI:98248   | Scn2a    |
| ENSMUST00000031766.11 | -0.28344709  | MGI:1350929 | Asns     |
| ENSMUST00000076961.8  | -0.28344709  | MGI:1201692 | Rabac1   |
| ENSMUST00000113233.7  | -0.28344709  | MGI:1914440 | Eif4e2   |
| ENSMUST00000202214.3  | -0.28344709  | MGI:1196608 | Slc4a1ap |
| ENSMUST00000106197.9  | -0.280939675 | MGI:2178103 | Arhgdia  |
| ENSMUST00000003527.9  | -0.280216028 | MGI:1202400 | Supt5    |
| ENSMUST00000047331.7  | -0.280216028 | MGI:2182619 | Lgi3     |
| ENSMUST00000052248.7  | -0.280216028 | MGI:1914410 | Eef1g    |
| ENSMUST00000110395.10 | -0.280216028 | MGI:96921   | Max      |
| ENSMUST00000171845.7  | -0.280216028 | MGI:88218   | Commd3   |
| ENSMUST00000036497.15 | -0.279477481 | MGI:97760   | Prkar2b  |
| ENSMUST00000031625.14 | -0.278861743 | MGI:1928896 | Arpc1a   |
| ENSMUST00000058159.5  | -0.278553276 | MGI:1917505 | Cnrip1   |
| ENSMUST00000022060.6  | -0.27673638  | MGI:109283  | Pdcd6    |
| ENSMUST00000021001.9  | -0.276716903 | MGI:105066  | Rab10    |
| ENSMUST00000015934.12 | -0.276659152 | MGI:98443   | Surf1    |
| ENSMUST00000034707.14 | -0.276659152 | MGI:88192   | Smarca4  |
| ENSMUST00000106439.1  | -0.276659152 | MGI:1926269 | Mrpl38   |
| ENSMUST00000117200.7  | -0.276659152 | MGI:1890110 | Robo2    |
| ENSMUST00000009727.11 | -0.275910664 | MGI:1328323 | Syng1    |
| ENSMUST00000039694.12 | -0.274784687 | MGI:1923455 | Stard3nl |
| ENSMUST00000043843.11 | -0.272748921 | MGI:109656  | Lasp1    |
| ENSMUST00000065970.5  | -0.272748921 | MGI:1917607 | Kcnip1   |
| ENSMUST00000102845.10 | -0.272748921 | MGI:1925544 | Rps27a   |
| ENSMUST00000001480.13 | -0.272724549 | MGI:1101358 | Npepps   |
| ENSMUST00000003964.16 | -0.272724549 | MGI:101805  | Gys1     |
| ENSMUST00000056601.10 | -0.272724549 | MGI:1915549 | Vps53    |
| ENSMUST00000057576.7  | -0.272724549 | MGI:2685013 | Cog7     |
| ENSMUST00000154032.1  | -0.272724549 | MGI:2446175 | Spryd3   |
| ENSMUST00000118209.7  | -0.270604689 | MGI:1100495 | Atp5pb   |
| ENSMUST00000025385.6  | -0.27060347  | MGI:105089  | Hsd17b4  |
| ENSMUST00000033018.14 | -0.269857804 | MGI:1914670 | Far1     |

|                       |              |             |            |
|-----------------------|--------------|-------------|------------|
| ENSMUST00000016452.10 | -0.26834866  | MGI:102959  | Ube2a      |
| ENSMUST00000027377.8  | -0.26834866  | MGI:96440   | Igfbp5     |
| ENSMUST00000035086.12 | -0.26834866  | MGI:1333753 | Pdcd6ip    |
| ENSMUST00000036700.6  | -0.26834866  | MGI:87934   | Adra2a     |
| ENSMUST00000037055.13 | -0.26834866  | MGI:1922022 | Atp13a2    |
| ENSMUST00000043169.13 | -0.26834866  | MGI:1915747 | Are1       |
| ENSMUST00000048678.6  | -0.26834866  | MGI:1336155 | Lss        |
| ENSMUST00000071402.6  | -0.26834866  | MGI:2156528 | Elovl6     |
| ENSMUST00000077338.11 | -0.26834866  | MGI:1913599 | Dmac2      |
| ENSMUST00000086851.1  | -0.26834866  | MGI:1859852 | Hes6       |
| ENSMUST00000111230.7  | -0.26834866  | MGI:1312985 | Tagln2     |
| ENSMUST00000091609.10 | -0.267642018 | MGI:1921575 | Cltb       |
| ENSMUST00000056758.8  | -0.267133196 | MGI:107164  | Ppp3ca     |
| ENSMUST00000045993.14 | -0.266734591 | MGI:1349414 | Cops4      |
| ENSMUST00000019679.11 | -0.265929784 | MGI:1924063 | Armc6      |
| ENSMUST00000052919.7  | -0.265929784 | MGI:1913862 | Ormdl3     |
| ENSMUST00000057373.13 | -0.265929784 | MGI:99425   | Rab11b     |
| ENSMUST00000237431.1  | -0.265929784 | MGI:2448270 | Rpl17      |
| ENSMUST00000106257.9  | -0.264373373 | MGI:88262   | Cap1       |
| ENSMUST00000018572.10 | -0.26345281  | MGI:104729  | Akap1      |
| ENSMUST00000021530.7  | -0.26345281  | MGI:106918  | Hif1a      |
| ENSMUST00000022235.5  | -0.26345281  | MGI:96273   | Htr1a      |
| ENSMUST00000025166.13 | -0.26345281  | MGI:88355   | Cdh2       |
| ENSMUST00000027897.7  | -0.26345281  | MGI:1915889 | Smyd2      |
| ENSMUST00000085745.12 | -0.26345281  | MGI:1921932 | Wdr35      |
| ENSMUST00000145167.7  | -0.26345281  | MGI:107898  | Selenoi    |
| ENSMUST00000024978.6  | -0.263383839 | MGI:1930182 | Nme3       |
| ENSMUST00000110731.3  | -0.263383839 | MGI:1914163 | Kdelr2     |
| ENSMUST00000028214.14 | -0.263360529 | MGI:2385131 | Sh3glb2    |
| ENSMUST00000186213.6  | -0.263337057 | MGI:1095410 | Tuba4a     |
| ENSMUST00000084949.2  | -0.261569789 | MGI:1915720 | Impad1     |
| ENSMUST00000000727.3  | -0.260680327 | MGI:105938  | Rab5b      |
| ENSMUST00000025853.15 | -0.260680327 | MGI:1913806 | Drap1      |
| ENSMUST00000033809.3  | -0.260680327 | MGI:97775   | Prps1      |
| ENSMUST00000034131.9  | -0.25938679  | MGI:1890467 | Vps35      |
| ENSMUST00000021130.6  | -0.257938437 | MGI:1916785 | Ten1       |
| ENSMUST00000031736.15 | -0.257938437 | MGI:2443267 | Agfg2      |
| ENSMUST00000036805.6  | -0.257938437 | MGI:1925920 | Plekhj1    |
| ENSMUST00000044278.5  | -0.257938437 | MGI:1349471 | St6galnac5 |

|                       |              |             |          |
|-----------------------|--------------|-------------|----------|
| ENSMUST00000064759.6  | -0.257938437 | MGI:2443884 | Strip1   |
| ENSMUST00000064941.6  | -0.257938437 | MGI:2444210 | Nr1d1    |
| ENSMUST00000078528.6  | -0.257938437 | MGI:1194505 | C1qbp    |
| ENSMUST00000099858.3  | -0.257938437 | MGI:1270863 | Prep     |
| ENSMUST00000102528.10 | -0.257938437 | MGI:104872  | Ppp1cc   |
| ENSMUST00000151309.7  | -0.257938437 | MGI:2441837 | Adgrb3   |
| ENSMUST00000174462.7  | -0.257938437 | MGI:1924769 | Zfp266   |
| ENSMUST00000200154.4  | -0.257938437 | MGI:2139714 | Adgrl2   |
| ENSMUST00000028102.13 | -0.257804147 | MGI:1098269 | Kif5c    |
| ENSMUST00000228198.1  | -0.257735883 | MGI:107795  | Hnrnpc   |
| ENSMUST00000106251.9  | -0.255655659 | MGI:1353633 | Fus      |
| ENSMUST00000001975.5  | -0.254738206 | MGI:1914080 | Nacc1    |
| ENSMUST00000024702.4  | -0.254738206 | MGI:1923748 | Paqr4    |
| ENSMUST00000079970.5  | -0.254738206 | MGI:1913495 | Hspb1    |
| ENSMUST00000098495.9  | -0.254738206 | MGI:109132  | Snap91   |
| ENSMUST00000119694.2  | -0.25354346  | MGI:1861434 | Ctsf     |
| ENSMUST00000080356.9  | -0.253221919 | MGI:1855690 | Snrpa    |
| ENSMUST00000067036.11 | -0.252962457 | MGI:88208   | Bsg      |
| ENSMUST00000066027.13 | -0.252677927 | MGI:1202877 | Dgcr6    |
| ENSMUST00000018653.7  | -0.251680374 | MGI:1920389 | Cenpv    |
| ENSMUST00000024708.5  | -0.251680374 | MGI:2151075 | Tnfrsf21 |
| ENSMUST00000026558.6  | -0.251680374 | MGI:2141866 | Ric8a    |
| ENSMUST00000028769.13 | -0.251680374 | MGI:97808   | Ptpa     |
| ENSMUST00000029938.9  | -0.251680374 | MGI:2385191 | Gtf2b    |
| ENSMUST00000030684.7  | -0.251680374 | MGI:2385207 | Gnl2     |
| ENSMUST00000031254.8  | -0.251680374 | MGI:2179430 | Klhl8    |
| ENSMUST00000033494.15 | -0.251680374 | MGI:1859615 | Otud5    |
| ENSMUST00000039476.14 | -0.251680374 | MGI:2441869 | Arhgef11 |
| ENSMUST00000039987.3  | -0.251680374 | MGI:2181659 | Tox      |
| ENSMUST00000044475.4  | -0.251680374 | MGI:1339639 | Ogt      |
| ENSMUST00000070172.5  | -0.251680374 | MGI:2444704 | Snx32    |
| ENSMUST00000072329.14 | -0.251680374 | MGI:2137586 | Dtnbp1   |
| ENSMUST00000080536.7  | -0.251680374 | MGI:1195458 | Abce1    |
| ENSMUST00000115511.8  | -0.251680374 | MGI:1923539 | Phf14    |
| ENSMUST00000174499.7  | -0.251680374 | MGI:1923020 | Brsk2    |
| ENSMUST00000185176.7  | -0.251680374 | MGI:2684762 | Lzts1    |
| ENSMUST00000194542.5  | -0.251680374 | MGI:1858732 | Keap1    |
| ENSMUST00000043814.4  | -0.251463076 | MGI:2143585 | Fig4     |
| ENSMUST00000053740.14 | -0.251463076 | MGI:1340045 | Zfp207   |

|                       |              |             |          |
|-----------------------|--------------|-------------|----------|
| ENSMUST00000075693.11 | -0.251463076 | MGI:1915532 | Yipf1    |
| ENSMUST00000163336.7  | -0.251463076 | MGI:1350932 | Ncoa4    |
| ENSMUST00000174252.7  | -0.251463076 | MGI:1289172 | Scyl2    |
| ENSMUST00000021610.6  | -0.249067983 | MGI:88394   | Chga     |
| ENSMUST00000046951.9  | -0.249067983 | MGI:1915333 | Pak1ip1  |
| ENSMUST00000088419.12 | -0.248520521 | MGI:2145597 | Mbnl2    |
| ENSMUST00000029610.8  | -0.247956581 | MGI:96009   | Hadh     |
| ENSMUST00000102695.3  | -0.247956581 | MGI:1917127 | Nt5m     |
| ENSMUST00000109249.8  | -0.247956581 | MGI:1919293 | Sulf2    |
| ENSMUST00000106677.7  | -0.245340097 | MGI:104878  | Prkar1a  |
| ENSMUST00000032931.8  | -0.244517226 | MGI:2448475 | Fchsd2   |
| ENSMUST00000035090.13 | -0.244517226 | MGI:1919429 | Fbxl2    |
| ENSMUST00000047485.14 | -0.244517226 | MGI:2685286 | Rundc3b  |
| ENSMUST00000077367.10 | -0.244517226 | MGI:95665   | Gba      |
| ENSMUST00000097811.9  | -0.244517226 | MGI:2152971 | Rims1    |
| ENSMUST00000103020.7  | -0.244517226 | MGI:1197518 | Aatk     |
| ENSMUST00000112810.7  | -0.244517226 | MGI:2444269 | Gtdc1    |
| ENSMUST00000112936.3  | -0.244517226 | MGI:2442789 | Rc3h2    |
| ENSMUST00000168787.7  | -0.244517226 | MGI:1916625 | Btbd9    |
| ENSMUST00000170580.2  | -0.244517226 | MGI:2687399 | Kcnf1    |
| ENSMUST00000180360.7  | -0.244517226 | MGI:2667252 | Ehbp1    |
| ENSMUST00000199834.4  | -0.244517226 | MGI:1921633 | Ubap2l   |
| ENSMUST00000106153.8  | -0.244193297 | MGI:2139150 | Ssx2ip   |
| ENSMUST00000188211.7  | -0.244193297 | MGI:106330  | Larp4b   |
| ENSMUST00000153700.8  | -0.243972747 | MGI:109492  | Oaz2     |
| ENSMUST00000007708.13 | -0.242582923 | MGI:1926334 | Ppp2r1a  |
| ENSMUST00000027863.12 | -0.242078122 | MGI:88108   | Atp1b1   |
| ENSMUST00000001845.12 | -0.24205621  | MGI:88266   | Capns1   |
| ENSMUST00000163242.2  | -0.241903298 | MGI:1859293 | Atxn10   |
| ENSMUST00000021412.8  | -0.241653682 | MGI:1347006 | Psmc6    |
| ENSMUST00000057257.9  | -0.241403341 | MGI:1915057 | Jkamp    |
| ENSMUST00000082223.12 | -0.241403341 | MGI:102854  | Rpl5     |
| ENSMUST00000020484.7  | -0.240143928 | MGI:1354175 | Txnrd1   |
| ENSMUST00000044721.12 | -0.239248956 | MGI:103286  | Atp6v0a1 |
| ENSMUST00000110876.8  | -0.238585002 | MGI:103263  | Mcf2l    |
| ENSMUST00000005643.13 | -0.236237225 | MGI:1342295 | Celf1    |
| ENSMUST00000016144.11 | -0.236237225 | MGI:108412  | Plpp1    |
| ENSMUST00000021226.13 | -0.236237225 | MGI:1914934 | Luc7l3   |
| ENSMUST00000022225.11 | -0.236237225 | MGI:1933161 | Trim23   |

|                       |              |             |               |
|-----------------------|--------------|-------------|---------------|
| ENSMUST00000025092.4  | -0.236237225 | MGI:1915277 | Tmem178       |
| ENSMUST00000027358.10 | -0.236237225 | MGI:1914071 | Bcs1l         |
| ENSMUST00000029084.8  | -0.236237225 | MGI:97386   | Ntsr1         |
| ENSMUST00000031538.8  | -0.236237225 | MGI:1919607 | 2210016L21Rik |
| ENSMUST00000032409.14 | -0.236237225 | MGI:1098535 | Camk1         |
| ENSMUST00000043680.8  | -0.236237225 | MGI:101834  | Tubg1         |
| ENSMUST00000046515.14 | -0.236237225 | MGI:2443191 | Nceh1         |
| ENSMUST00000050067.9  | -0.236237225 | MGI:1923858 | Hectd3        |
| ENSMUST00000058472.12 | -0.236237225 | MGI:1915916 | Svop          |
| ENSMUST00000068058.13 | -0.236237225 | MGI:1916977 | Usp46         |
| ENSMUST00000080919.11 | -0.236237225 | MGI:2442637 | Thrap3        |
| ENSMUST00000089236.10 | -0.236237225 | MGI:2444129 | Pnma2         |
| ENSMUST00000103066.9  | -0.236237225 | MGI:1921439 | Phactr3       |
| ENSMUST00000106157.7  | -0.236237225 | MGI:106441  | Zranb1        |
| ENSMUST00000204545.2  | -0.236237225 | MGI:1927340 | Mpp6          |
| ENSMUST00000236978.1  | -0.236237225 | MGI:1931787 | Scyl1         |
| ENSMUST00000052209.8  | -0.235774545 | MGI:99851   | Cbfb          |
| ENSMUST00000089027.2  | -0.235774545 | MGI:2139220 | Tm9sf4        |
| ENSMUST00000169687.7  | -0.235617495 | MGI:99778   | Gpd2          |
| ENSMUST00000021147.13 | -0.235490817 | MGI:1859270 | Exoc7         |
| ENSMUST00000003121.8  | -0.23248865  | MGI:96960   | Rab8a         |
| ENSMUST00000189373.7  | -0.23248865  | MGI:105371  | Spock1        |
| ENSMUST00000059667.8  | -0.231353459 | MGI:2157521 | Hpcal4        |
| ENSMUST00000009234.15 | -0.231045631 | MGI:1096368 | Ap1b1         |
| ENSMUST00000029178.6  | -0.231045631 | MGI:1913892 | Ctnnb1        |
| ENSMUST00000030905.8  | -0.231045631 | MGI:1916241 | Ssu72         |
| ENSMUST00000087557.11 | -0.231045631 | MGI:1926264 | Tspan6        |
| ENSMUST00000019323.10 | -0.230577089 | MGI:97050   | Mdh2          |
| ENSMUST00000072298.12 | -0.229927495 | MGI:1352499 | Ndr3          |
| ENSMUST00000024099.10 | -0.229184931 | MGI:87876   | Ache          |
| ENSMUST00000044106.5  | -0.229184931 | MGI:1351511 | Psm7          |
| ENSMUST00000111220.7  | -0.228886264 | MGI:2137858 | Cadm3         |
| ENSMUST00000002733.6  | -0.226556909 | MGI:1923848 | Gtf2f1        |
| ENSMUST00000004379.7  | -0.226556909 | MGI:1315195 | Emg1          |
| ENSMUST00000008088.8  | -0.226556909 | MGI:1920282 | Ttc9b         |
| ENSMUST00000015901.10 | -0.226556909 | MGI:1914668 | Ppil4         |
| ENSMUST00000026050.7  | -0.226556909 | MGI:1342273 | Gsto1         |
| ENSMUST00000027780.5  | -0.226556909 | MGI:2181074 | Acdb3         |
| ENSMUST00000030702.13 | -0.226556909 | MGI:2140494 | Ppp1r8        |

|                       |              |             |         |
|-----------------------|--------------|-------------|---------|
| ENSMUST00000031262.8  | -0.226556909 | MGI:1919133 | Coq2    |
| ENSMUST00000034912.5  | -0.226556909 | MGI:99694   | Rasgrf1 |
| ENSMUST00000037850.6  | -0.226556909 | MGI:1915054 | Snx2    |
| ENSMUST00000043359.8  | -0.226556909 | MGI:1935129 | Smarca5 |
| ENSMUST00000048578.2  | -0.226556909 | MGI:1914077 | Ttc1    |
| ENSMUST00000055128.11 | -0.226556909 | MGI:2683537 | Tapt1   |
| ENSMUST00000056665.3  | -0.226556909 | MGI:2388648 | Klhl11  |
| ENSMUST00000058884.9  | -0.226556909 | MGI:1921358 | Parn    |
| ENSMUST00000065601.12 | -0.226556909 | MGI:1338871 | Btrc    |
| ENSMUST00000082414.1  | -0.226556909 | MGI:102498  | mt-Nd4  |
| ENSMUST00000084519.6  | -0.226556909 | MGI:1920230 | Wdr11   |
| ENSMUST00000090024.10 | -0.226556909 | MGI:101859  | Ccser2  |
| ENSMUST00000094452.3  | -0.226556909 | MGI:2445030 | Wscd2   |
| ENSMUST00000098350.9  | -0.226556909 | MGI:2135958 | Scap    |
| ENSMUST00000099151.5  | -0.226556909 | MGI:98364   | Sox2    |
| ENSMUST00000099689.4  | -0.226556909 | MGI:3652053 | Gm13889 |
| ENSMUST00000102866.9  | -0.226556909 | MGI:1860267 | Set     |
| ENSMUST00000105267.7  | -0.226556909 | MGI:1919318 | Cnot2   |
| ENSMUST00000114023.2  | -0.226556909 | MGI:1913859 | Cryzl1  |
| ENSMUST00000156390.7  | -0.226556909 | MGI:106594  | Gk      |
| ENSMUST00000169314.8  | -0.226556909 | MGI:2442264 | Idi1    |
| ENSMUST00000179865.7  | -0.226556909 | MGI:88261   | Canx    |
| ENSMUST00000186380.6  | -0.226556909 | MGI:108177  | Dhx9    |
| ENSMUST00000206129.2  | -0.226556909 | MGI:5625257 | Gm42372 |
| ENSMUST00000003961.15 | -0.225910875 | MGI:1924037 | Ppfia3  |
| ENSMUST00000036570.4  | -0.225910875 | MGI:1920243 | Appl1   |
| ENSMUST00000049064.3  | -0.225910875 | MGI:1921262 | Rap2b   |
| ENSMUST00000079987.12 | -0.225910875 | MGI:1923380 | Las1l   |
| ENSMUST00000096246.4  | -0.225910875 | MGI:1097667 | Ganab   |
| ENSMUST00000102800.7  | -0.225910875 | MGI:1913941 | Gapvd1  |
| ENSMUST00000182709.7  | -0.225910875 | MGI:1201691 | Rnf4    |
| ENSMUST00000033609.8  | -0.225691249 | MGI:1343054 | Cstf2   |
| ENSMUST00000112699.8  | -0.225580615 | MGI:1933391 | Maged2  |
| ENSMUST00000087435.6  | -0.220315656 | MGI:1095407 | Bmpr2   |
| ENSMUST00000113710.7  | -0.220315656 | MGI:1100521 | Slc7a3  |
| ENSMUST00000023599.12 | -0.219239365 | MGI:106906  | Eif4a2  |
| ENSMUST00000073339.6  | -0.219012419 | MGI:1858305 | Pgrmc1  |
| ENSMUST00000046404.7  | -0.21865299  | MGI:1913872 | Ubr7    |
| ENSMUST00000001757.8  | -0.218064408 | MGI:1913393 | Eef1e1  |



|                       |              |             |          |
|-----------------------|--------------|-------------|----------|
| ENSMUST00000070478.3  | -0.217848955 | MGI:1349163 | Sdc3     |
| ENSMUST00000025110.4  | -0.217649506 | MGI:101759  | Syt4     |
| ENSMUST00000034049.4  | -0.217001731 | MGI:1353495 | Slc25a4  |
| ENSMUST00000005015.9  | -0.215087946 | MGI:2137738 | Prcc     |
| ENSMUST00000006914.10 | -0.215087946 | MGI:1342057 | B4galnt1 |
| ENSMUST00000022169.9  | -0.215087946 | MGI:96074   | Hexb     |
| ENSMUST00000029053.7  | -0.215087946 | MGI:97805   | Ptpn1    |
| ENSMUST00000029784.9  | -0.215087946 | MGI:1926034 | Celf3    |
| ENSMUST00000030145.8  | -0.215087946 | MGI:1916220 | Dcaf12   |
| ENSMUST00000030784.13 | -0.215087946 | MGI:1336153 | Prkag2   |
| ENSMUST00000032326.10 | -0.215087946 | MGI:1915005 | Ddx47    |
| ENSMUST00000033473.11 | -0.215087946 | MGI:109178  | Fgf13    |
| ENSMUST00000041804.7  | -0.215087946 | MGI:3036247 | Lmtk2    |
| ENSMUST00000042485.10 | -0.215087946 | MGI:2143322 | AW551984 |
| ENSMUST00000044200.10 | -0.215087946 | MGI:107891  | Nop2     |
| ENSMUST00000046399.6  | -0.215087946 | MGI:1919131 | Apmap    |
| ENSMUST00000048068.14 | -0.215087946 | MGI:1913662 | Arrdc4   |
| ENSMUST00000050312.2  | -0.215087946 | MGI:1309464 | Mapk8ip1 |
| ENSMUST00000060389.9  | -0.215087946 | MGI:1914860 | Rspry1   |
| ENSMUST00000073192.13 | -0.215087946 | MGI:1914003 | Erlec1   |
| ENSMUST00000077741.11 | -0.215087946 | MGI:2443511 | Slc9a6   |
| ENSMUST00000080856.13 | -0.215087946 | MGI:2442377 | Ipo11    |
| ENSMUST00000088666.3  | -0.215087946 | MGI:1924232 | Vxn      |
| ENSMUST00000090791.7  | -0.215087946 | MGI:1922387 | Rprd2    |
| ENSMUST00000090858.9  | -0.215087946 | MGI:2445173 | Ppig     |
| ENSMUST00000094569.10 | -0.215087946 | MGI:104753  | Nfasc    |
| ENSMUST00000096240.2  | -0.215087946 | MGI:1346340 | Mta2     |
| ENSMUST00000102810.9  | -0.215087946 | MGI:2139309 | Garnl3   |
| ENSMUST00000103143.9  | -0.215087946 | MGI:1919444 | Fbxl20   |
| ENSMUST00000103179.9  | -0.215087946 | MGI:2180699 | Mtmr4    |
| ENSMUST00000105845.8  | -0.215087946 | MGI:99611   | Ephb2    |
| ENSMUST00000107558.8  | -0.215087946 | MGI:99533   | Mef2d    |
| ENSMUST00000117648.8  | -0.215087946 | MGI:1276539 | Ttc3     |
| ENSMUST00000126390.7  | -0.215087946 | MGI:1196373 | Reps1    |
| ENSMUST00000154111.7  | -0.215087946 | MGI:1330239 | Dpm1     |
| ENSMUST00000161592.7  | -0.215087946 | MGI:1913516 | Eapp     |
| ENSMUST00000184973.7  | -0.215087946 | MGI:1914714 | Entpd4   |
| ENSMUST00000197188.4  | -0.215087946 | MGI:1261856 | Ankle2   |
| ENSMUST00000001155.10 | -0.214752778 | MGI:88065   | Araf     |

|                       |              |             |               |
|-----------------------|--------------|-------------|---------------|
| ENSMUST00000008893.8  | -0.214195076 | MGI:1345963 | Coro1b        |
| ENSMUST00000040576.9  | -0.214195076 | MGI:2443349 | Parm1         |
| ENSMUST00000057844.9  | -0.214195076 | MGI:1925771 | B230219D22Rik |
| ENSMUST00000098312.3  | -0.214195076 | MGI:2142527 | Exoc8         |
| ENSMUST00000112691.8  | -0.214195076 | MGI:2448557 | Gnl3l         |
| ENSMUST00000174259.7  | -0.214195076 | MGI:1096367 | Psme1         |
| ENSMUST00000189936.6  | -0.214195076 | MGI:1914848 | Uchl5         |
| ENSMUST00000064054.13 | -0.214008035 | MGI:99667   | Syt1          |
| ENSMUST00000019065.9  | -0.213890975 | MGI:1922523 | Pelp1         |
| ENSMUST00000112308.8  | -0.213890975 | MGI:1919666 | Lrpprc        |
| ENSMUST00000022256.4  | -0.213737681 | MGI:1913663 | Psmd6         |
| ENSMUST00000072299.6  | -0.213397471 | MGI:1349453 | Vsnl1         |
| ENSMUST00000030636.10 | -0.212150666 | MGI:96739   | Stmn1         |
| ENSMUST00000023095.13 | -0.209713051 | MGI:1345148 | Septin3       |
| ENSMUST00000025000.3  | -0.209446317 | MGI:2445190 | St6gal2       |
| ENSMUST00000034947.6  | -0.209446317 | MGI:97750   | Ppib          |
| ENSMUST00000094154.5  | -0.209446317 | MGI:88283   | Serpinh1      |
| ENSMUST00000165559.2  | -0.209103733 | MGI:2685518 | Ctif          |
| ENSMUST00000030623.7  | -0.20824274  | MGI:1918764 | Sfpq          |
| ENSMUST00000055808.5  | -0.208147603 | MGI:108109  | Ywhag         |
| ENSMUST00000029013.9  | -0.207718691 | MGI:1913929 | Rae1          |
| ENSMUST00000074523.12 | -0.20755035  | MGI:1931224 | Stmn4         |
| ENSMUST00000003876.9  | -0.207471436 | MGI:1925906 | Brd8          |
| ENSMUST00000023100.7  | -0.207471436 | MGI:107585  | Srebf2        |
| ENSMUST00000026520.13 | -0.207471436 | MGI:2384993 | Paip1         |
| ENSMUST00000045905.13 | -0.207471436 | MGI:2385001 | Fermt2        |
| ENSMUST00000049095.5  | -0.207471436 | MGI:109609  | Faah          |
| ENSMUST00000053686.8  | -0.207471436 | MGI:1931744 | Uck2          |
| ENSMUST00000070039.13 | -0.207471436 | MGI:2675856 | Fez2          |
| ENSMUST00000086519.11 | -0.207471436 | MGI:1927636 | Rplp0         |
| ENSMUST00000095014.7  | -0.207471436 | MGI:2447427 | Tgfbrap1      |
| ENSMUST00000069107.13 | -0.20723791  | MGI:1346858 | Mapk1         |
| ENSMUST00000020286.6  | -0.205667081 | MGI:97831   | Ppa1          |
| ENSMUST00000027726.13 | -0.204703082 | MGI:1919267 | Cyb5r1        |
| ENSMUST00000160964.7  | -0.204321221 | MGI:2384590 | Ndrp4         |
| ENSMUST00000033715.4  | -0.203555718 | MGI:1099438 | Nsdhl         |
| ENSMUST00000101534.4  | -0.203089305 | MGI:97804   | Ptn           |
| ENSMUST00000008878.9  | -0.201283652 | MGI:1927596 | Gprc5b        |
| ENSMUST00000015138.12 | -0.201283652 | MGI:95317   | Eln           |

|                       |              |             |         |
|-----------------------|--------------|-------------|---------|
| ENSMUST00000017530.3  | -0.201283652 | MGI:1202880 | Traf4   |
| ENSMUST00000017692.14 | -0.201283652 | MGI:1261758 | Suz12   |
| ENSMUST00000018569.13 | -0.201283652 | MGI:1914737 | Dhx40   |
| ENSMUST00000020947.6  | -0.201283652 | MGI:1920402 | Rdh14   |
| ENSMUST00000022099.14 | -0.201283652 | MGI:2384812 | Lpcat1  |
| ENSMUST00000022322.16 | -0.201283652 | MGI:95753   | Glud1   |
| ENSMUST00000022377.10 | -0.201283652 | MGI:1917811 | Txndc16 |
| ENSMUST00000025253.11 | -0.201283652 | MGI:1915467 | Prrc2a  |
| ENSMUST00000027252.7  | -0.201283652 | MGI:2441772 | Eif5b   |
| ENSMUST00000028635.5  | -0.201283652 | MGI:1330276 | Cops2   |
| ENSMUST00000029769.13 | -0.201283652 | MGI:104995  | Gclm    |
| ENSMUST00000030365.5  | -0.201283652 | MGI:1926268 | Mrpl37  |
| ENSMUST00000031090.7  | -0.201283652 | MGI:1916941 | Sel1l3  |
| ENSMUST00000031492.14 | -0.201283652 | MGI:1924657 | Rab35   |
| ENSMUST00000031621.10 | -0.201283652 | MGI:2141070 | Ccz1    |
| ENSMUST00000032080.8  | -0.201283652 | MGI:1920577 | Pradc1  |
| ENSMUST00000035889.14 | -0.201283652 | MGI:104785  | Myo6    |
| ENSMUST00000036288.10 | -0.201283652 | MGI:2448514 | R3hdm1  |
| ENSMUST00000038252.3  | -0.201283652 | MGI:1349461 | B3galt2 |
| ENSMUST00000043624.8  | -0.201283652 | MGI:3029632 | Med13   |
| ENSMUST00000046999.11 | -0.201283652 | MGI:1916008 | Abhd11  |
| ENSMUST00000048685.12 | -0.201283652 | MGI:1915894 | Abhd14a |
| ENSMUST00000059155.10 | -0.201283652 | MGI:1916289 | Insig1  |
| ENSMUST00000059642.16 | -0.201283652 | MGI:1888669 | Psmd8   |
| ENSMUST00000064740.8  | -0.201283652 | MGI:1927234 | Suclg1  |
| ENSMUST00000069443.13 | -0.201283652 | MGI:2145578 | Slain1  |
| ENSMUST00000075510.11 | -0.201283652 | MGI:2146808 | Safb2   |
| ENSMUST00000080721.5  | -0.201283652 | MGI:1926173 | Chsy3   |
| ENSMUST00000081728.6  | -0.201283652 | MGI:1195966 | Ctnnd2  |
| ENSMUST00000089925.9  | -0.201283652 | MGI:105060  | Dgkg    |
| ENSMUST00000090559.11 | -0.201283652 | MGI:1270859 | Cry2    |
| ENSMUST00000092629.3  | -0.201283652 | MGI:1914662 | Soga3   |
| ENSMUST00000099972.4  | -0.201283652 | MGI:96603   | Itga4   |
| ENSMUST00000108243.7  | -0.201283652 | MGI:1206581 | Pik3ca  |
| ENSMUST00000109097.8  | -0.201283652 | MGI:1924621 | Sec24a  |
| ENSMUST00000109543.8  | -0.201283652 | MGI:102889  | Vcan    |
| ENSMUST00000109579.8  | -0.201283652 | MGI:2384495 | Mrtfa   |
| ENSMUST00000109790.1  | -0.201283652 | MGI:2684063 | Asxl1   |
| ENSMUST00000112024.9  | -0.201283652 | MGI:1915674 | Chn1    |

|                       |              |             |          |
|-----------------------|--------------|-------------|----------|
| ENSMUST00000112471.8  | -0.201283652 | MGI:1917474 | Map7d2   |
| ENSMUST00000118788.7  | -0.201283652 | MGI:95745   | Hagh     |
| ENSMUST00000120595.7  | -0.201283652 | MGI:1919455 | Eml2     |
| ENSMUST00000125249.2  | -0.201283652 | MGI:3609243 | Isoc2a   |
| ENSMUST00000160456.7  | -0.201283652 | MGI:1917979 | Nos1ap   |
| ENSMUST00000162349.7  | -0.201283652 | MGI:108405  | Apbb2    |
| ENSMUST00000162372.7  | -0.201283652 | MGI:1923690 | Slc30a9  |
| ENSMUST00000164884.8  | -0.201283652 | MGI:1915773 | Ciao2b   |
| ENSMUST00000170202.8  | -0.201283652 | MGI:95871   | Guk1     |
| ENSMUST00000172272.7  | -0.201283652 | MGI:1920895 | Ddx46    |
| ENSMUST00000179543.7  | -0.201283652 | MGI:1931051 | Noc2l    |
| ENSMUST00000180376.7  | -0.201283652 | MGI:2447768 | Fam193a  |
| ENSMUST00000193777.5  | -0.201283652 | MGI:1298367 | Pcdha6   |
| ENSMUST00000193869.1  | -0.201283652 | MGI:1935214 | Pcdhga2  |
| ENSMUST00000209346.1  | -0.201283652 | MGI:2443755 | Rasgef1b |
| ENSMUST00000215370.1  | -0.201283652 | MGI:2387648 | Fam214a  |
| ENSMUST00000236586.1  | -0.201283652 | MGI:95513   | Fech     |
| ENSMUST00000027247.10 | -0.200050902 | MGI:1916083 | Pdcl3    |
| ENSMUST00000036578.6  | -0.200050902 | MGI:2139371 | Bahd1    |
| ENSMUST00000066379.10 | -0.200050902 | MGI:1913325 | Chchd3   |
| ENSMUST00000076313.12 | -0.200050902 | MGI:1860512 | Prpf40a  |
| ENSMUST00000079659.11 | -0.200050902 | MGI:1915208 | U2surp   |
| ENSMUST00000100507.7  | -0.200050902 | MGI:106478  | Eif3b    |
| ENSMUST00000121623.7  | -0.200050902 | MGI:1922870 | Kxd1     |
| ENSMUST00000141158.7  | -0.200050902 | MGI:1929461 | Adgr1    |
| ENSMUST00000001479.4  | -0.199630109 | MGI:107532  | Kpnb1    |
| ENSMUST00000034470.10 | -0.199630109 | MGI:1917656 | Vps26b   |
| ENSMUST00000044058.10 | -0.199630109 | MGI:1915600 | Mul1     |
| ENSMUST00000103061.2  | -0.199630109 | MGI:104837  | Amz2     |
| ENSMUST00000065118.6  | -0.199417811 | MGI:1924230 | Ube2ql1  |
| ENSMUST00000092892.9  | -0.199417811 | MGI:2144501 | Ankrd13b |
| ENSMUST00000117160.1  | -0.199417811 | MGI:99551   | Cdh13    |
| ENSMUST00000216925.1  | -0.199417811 | MGI:1916709 | Ubl7     |
| ENSMUST00000025645.13 | -0.199289816 | MGI:2147810 | Tmem132a |
| ENSMUST00000034230.6  | -0.198869412 | MGI:1097153 | Cx3cl1   |
| ENSMUST00000092096.13 | -0.197022373 | MGI:1928898 | Usp14    |
| ENSMUST00000236011.1  | -0.197022373 | MGI:1915229 | Atad1    |
| ENSMUST00000028059.8  | -0.196049982 | MGI:103040  | Rsu1     |
| ENSMUST00000183108.7  | -0.195357223 | MGI:2180003 | Xpnpep1  |

|                       |              |             |          |
|-----------------------|--------------|-------------|----------|
| ENSMUST00000022904.7  | -0.195008774 | MGI:1913585 | Atp6v1c1 |
| ENSMUST00000090971.10 | -0.194457245 | MGI:1096385 | Bcan     |
| ENSMUST00000046514.12 | -0.194191742 | MGI:97838   | Eprs     |
| ENSMUST00000165017.1  | -0.194191742 | MGI:1918019 | Nolc1    |
| ENSMUST00000032888.9  | -0.19257367  | MGI:1858943 | Arl6ip1  |
| ENSMUST00000040603.13 | -0.191819089 | MGI:1924809 | Agl      |
| ENSMUST00000041826.13 | -0.191819089 | MGI:1346341 | Rnf13    |
| ENSMUST00000047615.14 | -0.191819089 | MGI:1859183 | Smarcal1 |
| ENSMUST00000098817.3  | -0.191819089 | MGI:1261835 | Vps37a   |
| ENSMUST00000174302.7  | -0.191819089 | MGI:98512   | Ubtf     |
| ENSMUST00000177595.8  | -0.191819089 | MGI:1858901 | Fut8     |
| ENSMUST00000070395.8  | -0.190820501 | MGI:1916934 | Aarsd1   |
| ENSMUST00000106205.8  | -0.190820501 | MGI:104681  | Hgs      |
| ENSMUST00000162409.7  | -0.18913554  | MGI:1925642 | Fnbp1l   |
| ENSMUST00000005066.8  | -0.188346986 | MGI:1346866 | Map2k1   |
| ENSMUST00000047131.15 | -0.188346986 | MGI:1923001 | lpo4     |
| ENSMUST00000019354.10 | -0.187493654 | MGI:894326  | Atp6v1e1 |
| ENSMUST00000027127.13 | -0.186984308 | MGI:1932339 | Sf3b1    |
| ENSMUST00000036153.11 | -0.186858667 | MGI:1915363 | Cops8    |
| ENSMUST00000056427.9  | -0.186591408 | MGI:107861  | Tubb2a   |
| ENSMUST00000009220.4  | -0.18654463  | MGI:1914428 | Zmat5    |
| ENSMUST00000000291.8  | -0.184349006 | MGI:109150  | Mnt      |
| ENSMUST00000002889.4  | -0.184349006 | MGI:1342286 | Flii     |
| ENSMUST00000006286.8  | -0.184349006 | MGI:1194899 | Inpp5k   |
| ENSMUST00000018143.15 | -0.184349006 | MGI:2385884 | Ddx27    |
| ENSMUST00000019660.10 | -0.184349006 | MGI:1921820 | Zkscan1  |
| ENSMUST00000021166.5  | -0.184349006 | MGI:2149481 | Cygb     |
| ENSMUST00000021271.13 | -0.184349006 | MGI:1098283 | Per1     |
| ENSMUST00000022245.9  | -0.184349006 | MGI:1926237 | Mrps30   |
| ENSMUST00000022458.10 | -0.184349006 | MGI:1206586 | Bap1     |
| ENSMUST00000022720.14 | -0.184349006 | MGI:1354702 | Fbxl3    |
| ENSMUST00000022828.8  | -0.184349006 | MGI:1934682 | Emc9     |
| ENSMUST00000022976.5  | -0.184349006 | MGI:2146110 | Washc5   |
| ENSMUST00000023334.14 | -0.184349006 | MGI:1930171 | Nectin3  |
| ENSMUST00000025089.8  | -0.184349006 | MGI:2154405 | Map4k3   |
| ENSMUST00000025241.6  | -0.184349006 | MGI:95414   | Ercc3    |
| ENSMUST00000026658.12 | -0.184349006 | MGI:2443265 | Tnrc6c   |
| ENSMUST00000026832.13 | -0.184349006 | MGI:1919356 | Jmjd8    |
| ENSMUST00000027512.12 | -0.184349006 | MGI:1924290 | Atg16l1  |

|                       |              |             |               |
|-----------------------|--------------|-------------|---------------|
| ENSMUST00000028499.10 | -0.184349006 | MGI:96608   | Itgav         |
| ENSMUST00000028608.12 | -0.184349006 | MGI:2138939 | Nat10         |
| ENSMUST00000028668.7  | -0.184349006 | MGI:1925905 | Eif3j1        |
| ENSMUST00000028844.10 | -0.184349006 | MGI:1913802 | Sppl2a        |
| ENSMUST00000029386.13 | -0.184349006 | MGI:106100  | Etfdh         |
| ENSMUST00000029909.2  | -0.184349006 | MGI:101813  | Coq3          |
| ENSMUST00000031414.14 | -0.184349006 | MGI:1919649 | Brap          |
| ENSMUST00000037915.8  | -0.184349006 | MGI:1921276 | Msl1          |
| ENSMUST00000038185.9  | -0.184349006 | MGI:1922485 | Exd2          |
| ENSMUST00000039013.14 | -0.184349006 | MGI:1351617 | Abca3         |
| ENSMUST00000039733.9  | -0.184349006 | MGI:2146553 | Osbpl11       |
| ENSMUST00000039926.9  | -0.184349006 | MGI:106626  | Dusp8         |
| ENSMUST00000040500.8  | -0.184349006 | MGI:2442474 | Dgkb          |
| ENSMUST00000041231.13 | -0.184349006 | MGI:2143994 | Psme4         |
| ENSMUST00000041587.7  | -0.184349006 | MGI:2146207 | Gga1          |
| ENSMUST00000041638.7  | -0.184349006 | MGI:2138383 | Gtf3c3        |
| ENSMUST00000041965.4  | -0.184349006 | MGI:2136459 | Cdc42bpb      |
| ENSMUST00000042055.9  | -0.184349006 | MGI:1346006 | Ptpa          |
| ENSMUST00000042196.3  | -0.184349006 | MGI:2179729 | Vwa1          |
| ENSMUST00000043138.12 | -0.184349006 | MGI:2141867 | Inpp5f        |
| ENSMUST00000044507.11 | -0.184349006 | MGI:2158663 | Inpp5j        |
| ENSMUST00000047664.15 | -0.184349006 | MGI:2442507 | Arhgef4       |
| ENSMUST00000048976.7  | -0.184349006 | MGI:1926562 | Gucy1a1       |
| ENSMUST00000050772.9  | -0.184349006 | MGI:1926225 | Slc22a17      |
| ENSMUST00000051169.12 | -0.184349006 | MGI:1919831 | Edrf1         |
| ENSMUST00000051341.5  | -0.184349006 | MGI:2145901 | Mfsd5         |
| ENSMUST00000051377.14 | -0.184349006 | MGI:2443952 | Dpy19l3       |
| ENSMUST00000051950.13 | -0.184349006 | MGI:1277223 | Atxn2         |
| ENSMUST00000055792.7  | -0.184349006 | MGI:3583960 | D030056L22Rik |
| ENSMUST00000058716.13 | -0.184349006 | MGI:1924303 | Sun1          |
| ENSMUST00000060435.6  | -0.184349006 | MGI:2151208 | Selenon       |
| ENSMUST00000062117.13 | -0.184349006 | MGI:97855   | Rap2a         |
| ENSMUST00000063857.10 | -0.184349006 | MGI:95760   | Slc6a9        |
| ENSMUST00000069453.8  | -0.184349006 | MGI:2679683 | Paqr3         |
| ENSMUST00000070064.10 | -0.184349006 | MGI:97566   | Pgm3          |
| ENSMUST00000072744.14 | -0.184349006 | MGI:2144805 | Vipas39       |
| ENSMUST00000074733.10 | -0.184349006 | MGI:1277214 | Septin11      |
| ENSMUST00000079362.12 | -0.184349006 | MGI:88039   | Apc           |
| ENSMUST00000079597.6  | -0.184349006 | MGI:1922802 | Paqr9         |

|                       |              |             |          |
|-----------------------|--------------|-------------|----------|
| ENSMUST00000084615.9  | -0.184349006 | MGI:1859165 | Cacng3   |
| ENSMUST00000085383.10 | -0.184349006 | MGI:2141980 | Scaf1    |
| ENSMUST00000085385.6  | -0.184349006 | MGI:1931050 | Ralgapa1 |
| ENSMUST00000087104.10 | -0.184349006 | MGI:1278336 | Cdkl5    |
| ENSMUST00000087659.10 | -0.184349006 | MGI:2685817 | Hecw2    |
| ENSMUST00000088615.10 | -0.184349006 | MGI:2442988 | Arfgef1  |
| ENSMUST00000089311.10 | -0.184349006 | MGI:2443011 | Sun2     |
| ENSMUST00000092618.8  | -0.184349006 | MGI:107789  | Aup1     |
| ENSMUST00000092834.11 | -0.184349006 | MGI:1354742 | Synrg    |
| ENSMUST00000092857.12 | -0.184349006 | MGI:1926078 | Rhot1    |
| ENSMUST00000093852.4  | -0.184349006 | MGI:103222  | Zbtb16   |
| ENSMUST00000096368.3  | -0.184349006 | MGI:1316727 | Gspt2    |
| ENSMUST00000098363.9  | -0.184349006 | MGI:2152211 | Necab2   |
| ENSMUST00000099513.7  | -0.184349006 | MGI:1298210 | Hcn2     |
| ENSMUST00000101122.2  | -0.184349006 | MGI:1202299 | Gpr27    |
| ENSMUST00000101509.8  | -0.184349006 | MGI:96417   | Ids      |
| ENSMUST00000101532.9  | -0.184349006 | MGI:2443430 | Dgki     |
| ENSMUST00000102628.10 | -0.184349006 | MGI:2387201 | Yrdc     |
| ENSMUST00000102776.4  | -0.184349006 | MGI:1891717 | Rnf130   |
| ENSMUST00000102905.7  | -0.184349006 | MGI:5141924 | Pakap    |
| ENSMUST00000102905.7  | -0.184349006 | MGI:5141924 | Pakap    |
| ENSMUST00000102905.7  | -0.184349006 | MGI:5141924 | Pakap    |
| ENSMUST00000102905.7  | -0.184349006 | MGI:5141924 | Pakap    |
| ENSMUST00000102905.7  | -0.184349006 | MGI:5141924 | Pakap    |
| ENSMUST00000102905.7  | -0.184349006 | MGI:5141924 | Pakap    |
| ENSMUST00000102905.7  | -0.184349006 | MGI:5141924 | Pakap    |
| ENSMUST00000102905.7  | -0.184349006 | MGI:5141924 | Pakap    |
| ENSMUST00000102905.7  | -0.184349006 | MGI:5141924 | Pakap    |
| ENSMUST00000105032.3  | -0.184349006 | MGI:3651622 | Fam43b   |
| ENSMUST00000105283.8  | -0.184349006 | MGI:96974   | Kitl     |
| ENSMUST00000107695.8  | -0.184349006 | MGI:1933163 | Trim2    |
| ENSMUST00000107734.9  | -0.184349006 | MGI:2182799 | Kat7     |
| ENSMUST00000108777.9  | -0.184349006 | MGI:2144404 | Jmjd4    |
| ENSMUST00000111238.7  | -0.184349006 | MGI:1921819 | Ttc17    |
| ENSMUST00000111557.7  | -0.184349006 | MGI:2444273 | Dennd5b  |
| ENSMUST00000111879.4  | -0.184349006 | MGI:3039580 | Dclk3    |
| ENSMUST00000113641.3  | -0.184349006 | MGI:1932051 | Kat5     |
| ENSMUST00000114656.7  | -0.184349006 | MGI:95564   | Fmr1     |
| ENSMUST00000115077.7  | -0.184349006 | MGI:1351667 | Abcb8    |

|                      |              |             |          |
|----------------------|--------------|-------------|----------|
| ENSMUST00000117394.1 | -0.184349006 | MGI:1915919 | Taok2    |
| ENSMUST00000118317.7 | -0.184349006 | MGI:1314873 | Hipk1    |
| ENSMUST00000120705.2 | -0.184349006 | MGI:1915699 | Tbc1d10b |
| ENSMUST00000122041.7 | -0.184349006 | MGI:99555   | Pde4d    |
| ENSMUST00000123285.1 | -0.184349006 | MGI:2443135 | Nyap2    |
| ENSMUST00000124973.8 | -0.184349006 | MGI:1922066 | Tpr      |
| ENSMUST00000126071.8 | -0.184349006 | MGI:1923827 | Faf2     |
| ENSMUST00000126879.7 | -0.184349006 | MGI:2176229 | Zfp369   |
| ENSMUST00000127188.2 | -0.184349006 | MGI:3648074 | Tmem240  |
| ENSMUST00000128119.1 | -0.184349006 | MGI:2446294 | Megf8    |
| ENSMUST00000129362.1 | -0.184349006 | MGI:1929878 | Smoc1    |
| ENSMUST00000130048.7 | -0.184349006 | MGI:106199  | Vegfb    |
| ENSMUST00000130916.7 | -0.184349006 | MGI:1891828 | Becn1    |
| ENSMUST00000133843.7 | -0.184349006 | MGI:6121585 | Gm49369  |
| ENSMUST00000148750.7 | -0.184349006 | MGI:1927555 | Slc4a4   |
| ENSMUST00000149359.1 | -0.184349006 | MGI:3050795 | Mrtfb    |
| ENSMUST00000153838.7 | -0.184349006 | MGI:1918177 | Setd2    |
| ENSMUST00000154584.8 | -0.184349006 | MGI:1913906 | Eef1d    |
| ENSMUST00000154617.7 | -0.184349006 | MGI:1270849 | Rps6kb1  |
| ENSMUST00000159917.7 | -0.184349006 | MGI:97502   | Pcmt1    |
| ENSMUST00000160844.9 | -0.184349006 | MGI:1096391 | Nrxn1    |
| ENSMUST00000168645.7 | -0.184349006 | MGI:2181434 | Phc3     |
| ENSMUST00000171474.1 | -0.184349006 | MGI:1917488 | Rnf168   |
| ENSMUST00000172306.2 | -0.184349006 | MGI:2387100 | Dusp7    |
| ENSMUST00000172435.7 | -0.184349006 | MGI:1917195 | Fndc4    |
| ENSMUST00000173107.7 | -0.184349006 | MGI:1315205 | Slit2    |
| ENSMUST00000177501.1 | -0.184349006 | MGI:1915068 | Tmem70   |
| ENSMUST00000181586.7 | -0.184349006 | MGI:88473   | Cox4i1   |
| ENSMUST00000183728.1 | -0.184349006 | MGI:3644991 | Gm15013  |
| ENSMUST00000188285.6 | -0.184349006 | MGI:99923   | Kcnma1   |
| ENSMUST00000188482.7 | -0.184349006 | MGI:97250   | Myc      |
| ENSMUST00000191275.6 | -0.184349006 | MGI:1890169 | Erbin    |
| ENSMUST00000192931.1 | -0.184349006 | MGI:1935169 | Pcdhgb1  |
| ENSMUST00000195112.1 | -0.184349006 | MGI:1935170 | Pcdhgb2  |
| ENSMUST00000204128.2 | -0.184349006 | MGI:1913581 | Galnt16  |
| ENSMUST00000204667.1 | -0.184349006 | MGI:1315214 | Gpr162   |
| ENSMUST00000209902.1 | -0.184349006 | MGI:1931221 | Hdac9    |
| ENSMUST00000211948.1 | -0.184349006 | MGI:2683541 | Mast3    |
| ENSMUST00000225661.2 | -0.184349006 | MGI:2443008 | Trappc8  |



|                       |              |             |           |
|-----------------------|--------------|-------------|-----------|
| ENSMUST00000098402.4  | -0.183182024 | MGI:98347   | Snrpn     |
| ENSMUST00000233357.1  | -0.183182024 | MGI:6270609 | Gm49909   |
| ENSMUST00000114013.7  | -0.183007177 | MGI:97175   | Map2      |
| ENSMUST00000002839.8  | -0.182635101 | MGI:2388481 | Ppp2r5d   |
| ENSMUST00000016781.7  | -0.182635101 | MGI:1914292 | Ift27     |
| ENSMUST00000020283.4  | -0.182635101 | MGI:3037658 | Macroh2a2 |
| ENSMUST00000026760.2  | -0.182635101 | MGI:2177570 | Tmem47    |
| ENSMUST00000051301.5  | -0.182635101 | MGI:103079  | Pura      |
| ENSMUST00000064391.11 | -0.182635101 | MGI:1914121 | Cpne8     |
| ENSMUST00000069180.7  | -0.182635101 | MGI:1919168 | Zcchc24   |
| ENSMUST00000070748.9  | -0.182635101 | MGI:894670  | Ldb2      |
| ENSMUST00000071442.11 | -0.182635101 | MGI:1099802 | Npdc1     |
| ENSMUST00000102521.8  | -0.182635101 | MGI:3028623 | Rap1gap2  |
| ENSMUST00000103215.10 | -0.182635101 | MGI:1929258 | Kcnip3    |
| ENSMUST00000165418.8  | -0.182635101 | MGI:1332234 | Zfp148    |
| ENSMUST00000166487.9  | -0.182635101 | MGI:1915088 | Dnajb11   |
| ENSMUST00000030642.2  | -0.18231658  | MGI:1347045 | Psmb2     |
| ENSMUST00000027981.7  | -0.182048466 | MGI:1334459 | Uap1      |
| ENSMUST00000028610.9  | -0.182048466 | MGI:88271   | Cat       |
| ENSMUST00000031227.10 | -0.182048466 | MGI:1927246 | Zfp326    |
| ENSMUST00000045296.5  | -0.182048466 | MGI:108064  | Siah1a    |
| ENSMUST00000071585.9  | -0.182048466 | MGI:97440   | Opr1      |
| ENSMUST00000123121.8  | -0.182048466 | MGI:1934928 | Dusp15    |
| ENSMUST00000233580.1  | -0.182048466 | MGI:2137520 | Twsg1     |
| ENSMUST00000010038.9  | -0.181042453 | MGI:1915076 | Snap47    |
| ENSMUST00000094361.10 | -0.177520405 | MGI:96250   | Hsp90aa1  |
| ENSMUST00000099356.9  | -0.177520405 | MGI:2145242 | Arrdc3    |
| ENSMUST00000034966.8  | -0.177201173 | MGI:1915141 | Rpl4      |
| ENSMUST00000034377.7  | -0.176671291 | MGI:2178076 | Pla2g15   |
| ENSMUST00000055676.3  | -0.176671291 | MGI:1096355 | S1pr1     |
| ENSMUST00000020999.6  | -0.175241139 | MGI:107979  | Kif3c     |
| ENSMUST00000038027.5  | -0.175241139 | MGI:95797   | Gpi1      |
| ENSMUST00000045743.12 | -0.175241139 | MGI:1336185 | Prkab2    |
| ENSMUST00000068725.9  | -0.175241139 | MGI:1914497 | Mtarc2    |
| ENSMUST00000070726.9  | -0.175241139 | MGI:2147279 | Slc39a6   |
| ENSMUST00000097590.4  | -0.175241139 | MGI:1913808 | Lars      |
| ENSMUST00000114630.2  | -0.175241139 | MGI:2448555 | Tmem185a  |
| ENSMUST00000030698.4  | -0.174574539 | MGI:1931027 | Stx12     |
| ENSMUST00000005954.8  | -0.172323365 | MGI:1927580 | Bloc1s6   |

|                       |              |             |          |
|-----------------------|--------------|-------------|----------|
| ENSMUST00000016569.10 | -0.172323365 | MGI:2140945 | Pds5b    |
| ENSMUST00000026436.9  | -0.172323365 | MGI:2137336 | Baiap2   |
| ENSMUST00000030986.14 | -0.172323365 | MGI:96829   | Lrpap1   |
| ENSMUST00000032114.7  | -0.172323365 | MGI:1929872 | Mogs     |
| ENSMUST00000054547.8  | -0.172323365 | MGI:99511   | Ptpn11   |
| ENSMUST00000063508.14 | -0.172323365 | MGI:95811   | Gria4    |
| ENSMUST00000066529.4  | -0.172323365 | MGI:97373   | Npr3     |
| ENSMUST00000076070.8  | -0.172323365 | MGI:1914447 | Zcrb1    |
| ENSMUST00000087211.8  | -0.172323365 | MGI:1289273 | Ppp1r10  |
| ENSMUST00000114002.8  | -0.172323365 | MGI:1338069 | Itsn1    |
| ENSMUST00000116456.9  | -0.172323365 | MGI:1335107 | Cyth3    |
| ENSMUST00000126008.7  | -0.172323365 | MGI:1915133 | Uxs1     |
| ENSMUST00000160726.3  | -0.172323365 | MGI:3034689 | Fbll1    |
| ENSMUST00000172142.7  | -0.172323365 | MGI:1928323 | Nisch    |
| ENSMUST00000103186.10 | -0.171922188 | MGI:2388633 | Cltc     |
| ENSMUST00000031697.8  | -0.171275057 | MGI:1349658 | Cul1     |
| ENSMUST00000034388.9  | -0.171275057 | MGI:1890520 | Vps4a    |
| ENSMUST00000109813.8  | -0.170273816 | MGI:88257   | Camk2b   |
| ENSMUST00000029423.8  | -0.169182696 | MGI:1194506 | Serpini1 |
| ENSMUST00000015622.7  | -0.168801654 | MGI:1860076 | Rnf5     |
| ENSMUST00000017975.6  | -0.167900255 | MGI:105926  | Rab5a    |
| ENSMUST00000004965.7  | -0.167860668 | MGI:1916192 | Chmp2b   |
| ENSMUST00000030140.2  | -0.167860668 | MGI:1914544 | Elp1     |
| ENSMUST00000115148.8  | -0.167860668 | MGI:1914953 | Kirrel3  |
| ENSMUST00000187541.6  | -0.167860668 | MGI:106217  | Cacna1e  |
| ENSMUST00000021345.13 | -0.165883872 | MGI:1933277 | Gtf2a1   |
| ENSMUST00000029845.14 | -0.165883872 | MGI:1916469 | Ddah1    |
| ENSMUST00000108530.1  | -0.165533145 | MGI:104900  | Nup88    |
| ENSMUST00000081542.5  | -0.164104249 | MGI:102663  | Kcnd2    |
| ENSMUST00000129339.7  | -0.162440488 | MGI:1929520 | Eef1b2   |
| ENSMUST00000018905.11 | -0.160662251 | MGI:1346040 | Mpdu1    |
| ENSMUST00000023132.4  | -0.160662251 | MGI:97523   | Pde1b    |
| ENSMUST00000025506.6  | -0.160662251 | MGI:1914060 | Rbm22    |
| ENSMUST00000030536.12 | -0.160662251 | MGI:1916193 | Pink1    |
| ENSMUST00000033544.13 | -0.160662251 | MGI:2389572 | Brcc3    |
| ENSMUST00000043526.14 | -0.160662251 | MGI:1921506 | Cyld     |
| ENSMUST00000044767.9  | -0.160662251 | MGI:106593  | Neurod6  |
| ENSMUST00000047614.3  | -0.160662251 | MGI:1298370 | Pcdha12  |
| ENSMUST00000069221.11 | -0.160662251 | MGI:1891690 | Syncrip  |

|                       |              |             |               |
|-----------------------|--------------|-------------|---------------|
| ENSMUST00000079833.5  | -0.160662251 | MGI:96239   | Hsf2          |
| ENSMUST00000107094.1  | -0.160662251 | MGI:96646   | Jun           |
| ENSMUST00000193603.5  | -0.160662251 | MGI:2179435 | Nlgn1         |
| ENSMUST00000027174.9  | -0.15983138  | MGI:1933184 | Nop58         |
| ENSMUST00000047036.9  | -0.15983138  | MGI:1917583 | Cd3eap        |
| ENSMUST00000162812.7  | -0.15983138  | MGI:1336192 | Pitpnm2       |
| ENSMUST00000019577.9  | -0.159411192 | MGI:1926252 | Gipc1         |
| ENSMUST00000022766.7  | -0.159411192 | MGI:1915389 | Tox4          |
| ENSMUST00000036470.13 | -0.159411192 | MGI:2685477 | Ccdc32        |
| ENSMUST00000028426.8  | -0.159157539 | MGI:2442564 | Cers6         |
| ENSMUST00000047408.5  | -0.159157539 | MGI:2448730 | Atcay         |
| ENSMUST00000007980.6  | -0.158987789 | MGI:1924384 | Hnrnpa0       |
| ENSMUST00000065938.14 | -0.158987789 | MGI:1933158 | Impa1         |
| ENSMUST00000051064.8  | -0.158600054 | MGI:1914556 | Zc2hc1a       |
| ENSMUST00000011896.7  | -0.15476755  | MGI:97552   | Pgam1         |
| ENSMUST00000172387.7  | -0.154649804 | MGI:2137218 | Mrpl13        |
| ENSMUST00000022925.9  | -0.153941104 | MGI:1915385 | Eif3h         |
| ENSMUST00000110375.8  | -0.153941104 | MGI:2139090 | Stard7        |
| ENSMUST00000029803.11 | -0.152870115 | MGI:95305   | Eif4e         |
| ENSMUST00000103188.9  | -0.152870115 | MGI:1914576 | 1700037H04Rik |
| ENSMUST00000112707.2  | -0.152870115 | MGI:2141353 | Lrrc8b        |
| ENSMUST00000115578.9  | -0.152870115 | MGI:109353  | Ufd1          |
| ENSMUST00000028252.13 | -0.152172957 | MGI:1355324 | Grb14         |
| ENSMUST00000103242.4  | -0.152172957 | MGI:1916321 | Tmem97        |
| ENSMUST00000018430.6  | -0.151293955 | MGI:104880  | Psmb6         |
| ENSMUST00000075181.10 | -0.151063641 | MGI:2442213 | Plekha1       |
| ENSMUST00000116234.8  | -0.151063641 | MGI:99436   | Arl1          |
| ENSMUST00000140991.1  | -0.151063641 | MGI:1927479 | Sap30bp       |
| ENSMUST00000024739.13 | -0.150949004 | MGI:96247   | Hsp90ab1      |
| ENSMUST00000022197.14 | -0.149466905 | MGI:1349480 | Scamp1        |
| ENSMUST00000025642.13 | -0.147840443 | MGI:106247  | Prpf19        |
| ENSMUST00000000985.6  | -0.147367882 | MGI:1916339 | Oxa1l         |
| ENSMUST00000021424.4  | -0.147367882 | MGI:108074  | Sptlc2        |
| ENSMUST00000023071.7  | -0.147367882 | MGI:1915903 | Samm50        |
| ENSMUST00000032422.5  | -0.147367882 | MGI:2152539 | Creld1        |
| ENSMUST00000044384.4  | -0.147367882 | MGI:1919785 | Aldh1b1       |
| ENSMUST00000047799.12 | -0.147367882 | MGI:2143169 | Acad11        |
| ENSMUST00000059849.14 | -0.147367882 | MGI:1931035 | Nelfb         |
| ENSMUST00000060474.13 | -0.147367882 | MGI:1888939 | Septin6       |

|                       |              |             |          |
|-----------------------|--------------|-------------|----------|
| ENSMUST00000067491.13 | -0.147367882 | MGI:1350922 | Cadps    |
| ENSMUST00000080164.11 | -0.147367882 | MGI:1914149 | Fip1l1   |
| ENSMUST00000080371.7  | -0.147367882 | MGI:2384818 | Mtss1    |
| ENSMUST00000084885.11 | -0.147367882 | MGI:104889  | Ubp1     |
| ENSMUST00000110064.7  | -0.147367882 | MGI:1920149 | MacroD2  |
| ENSMUST00000112121.5  | -0.147367882 | MGI:1924015 | Mlec     |
| ENSMUST00000130491.2  | -0.147367882 | MGI:104982  | Cebpg    |
| ENSMUST00000151189.1  | -0.147367882 | MGI:1913926 | Tmed7    |
| ENSMUST00000156876.7  | -0.147367882 | MGI:1922925 | Mfsd6    |
| ENSMUST00000161074.7  | -0.147367882 | MGI:1914097 | Hint3    |
| ENSMUST00000197992.1  | -0.147367882 | MGI:1925076 | Lhfp13   |
| ENSMUST00000008573.8  | -0.14586527  | MGI:1915393 | Herpud2  |
| ENSMUST00000057486.8  | -0.14586527  | MGI:1916089 | Ankrd46  |
| ENSMUST00000061143.14 | -0.14586527  | MGI:2384297 | Map7d1   |
| ENSMUST00000027494.10 | -0.145356184 | MGI:1913635 | Ppp1r7   |
| ENSMUST00000027777.11 | -0.145356184 | MGI:1340806 | Parp1    |
| ENSMUST00000000137.7  | -0.14504763  | MGI:1913963 | Actr2    |
| ENSMUST00000022960.3  | -0.143098506 | MGI:99257   | Eif3e    |
| ENSMUST00000035043.11 | -0.142605568 | MGI:1921375 | Armc8    |
| ENSMUST00000046094.5  | -0.142605568 | MGI:103016  | Ppp1ca   |
| ENSMUST00000049040.13 | -0.142605568 | MGI:1924059 | Bri3bp   |
| ENSMUST00000023116.6  | -0.141507714 | MGI:87880   | Aco2     |
| ENSMUST00000021170.8  | -0.141450483 | MGI:1914872 | Mxra7    |
| ENSMUST00000033577.10 | -0.141450483 | MGI:1914933 | Pbdc1    |
| ENSMUST00000043374.6  | -0.141450483 | MGI:1923392 | Ppp1r14c |
| ENSMUST00000102830.9  | -0.141450483 | MGI:1343489 | Mpdz     |
| ENSMUST00000028607.12 | -0.141370952 | MGI:1858234 | Caprin1  |
| ENSMUST00000113820.8  | -0.141344286 | MGI:1923959 | Arpc2    |
| ENSMUST00000106112.1  | -0.140803704 | MGI:109326  | Bnip3    |
| ENSMUST00000027974.6  | -0.138742498 | MGI:1926157 | Atf6     |
| ENSMUST00000002400.6  | -0.138345432 | MGI:1915131 | Mdp1     |
| ENSMUST00000023677.9  | -0.138345432 | MGI:106341  | Atp5o    |
| ENSMUST00000023677.9  | -0.138345432 | MGI:106341  | Atp5o    |
| ENSMUST00000023677.9  | -0.138345432 | MGI:106341  | Atp5o    |
| ENSMUST00000023677.9  | -0.138345432 | MGI:106341  | Atp5o    |
| ENSMUST00000026572.10 | -0.138345432 | MGI:96224   | Hras     |
| ENSMUST00000029387.14 | -0.138345432 | MGI:1098684 | Eif2a    |
| ENSMUST00000041591.15 | -0.138345432 | MGI:1321390 | Enpp2    |
| ENSMUST00000137826.7  | -0.138345432 | MGI:1861305 | Fntb     |

|                       |              |             |               |
|-----------------------|--------------|-------------|---------------|
| ENSMUST00000169536.7  | -0.138345432 | MGI:1919602 | Zfyve27       |
| ENSMUST00000080035.10 | -0.137988202 | MGI:2177151 | Cd99l2        |
| ENSMUST00000046587.7  | -0.136567194 | MGI:1928948 | Scamp5        |
| ENSMUST00000025836.5  | -0.133490975 | MGI:2137215 | Mrpl11        |
| ENSMUST00000061242.7  | -0.132537326 | MGI:99431   | Arf1          |
| ENSMUST00000001256.10 | -0.132070583 | MGI:1202889 | Sema6b        |
| ENSMUST00000018577.7  | -0.132070583 | MGI:1916229 | Nol11         |
| ENSMUST00000030665.6  | -0.132070583 | MGI:106014  | Nudc          |
| ENSMUST00000031411.14 | -0.132070583 | MGI:99600   | Aldh2         |
| ENSMUST00000034281.12 | -0.132070583 | MGI:2443793 | 6430548M08Rik |
| ENSMUST00000035721.13 | -0.132070583 | MGI:1914479 | Prpf18        |
| ENSMUST00000040718.5  | -0.132070583 | MGI:2655574 | Ostm1         |
| ENSMUST00000067663.13 | -0.132070583 | MGI:1098754 | Psmc3         |
| ENSMUST00000072055.12 | -0.132070583 | MGI:107760  | Chka          |
| ENSMUST00000081170.8  | -0.132070583 | MGI:1346523 | Sgcb          |
| ENSMUST00000097625.9  | -0.132070583 | MGI:97475   | Pam           |
| ENSMUST00000103013.9  | -0.132070583 | MGI:1919686 | Tbcd          |
| ENSMUST00000105362.7  | -0.132070583 | MGI:1917498 | Dazap1        |
| ENSMUST00000115443.7  | -0.132070583 | MGI:96969   | Met           |
| ENSMUST00000125541.1  | -0.132070583 | MGI:1916789 | Trnp1         |
| ENSMUST00000166237.7  | -0.132070583 | MGI:107560  | Sema4a        |
| ENSMUST00000166897.2  | -0.132070583 | MGI:106295  | Tom70a        |
| ENSMUST00000179804.7  | -0.132070583 | MGI:1929288 | Cldn12        |
| ENSMUST00000217262.1  | -0.132070583 | MGI:1914224 | Rnf187        |
| ENSMUST00000239008.1  | -0.132070583 | MGI:3647581 | Tmem178b      |
| ENSMUST00000085519.12 | -0.131817631 | MGI:108447  | Anp32a        |
| ENSMUST00000026494.13 | -0.130863186 | MGI:2444521 | Rnf165        |
| ENSMUST00000028599.7  | -0.130863186 | MGI:1351825 | Cstf3         |
| ENSMUST00000036541.7  | -0.130863186 | MGI:1922673 | Arl5a         |
| ENSMUST00000037900.8  | -0.130863186 | MGI:2142747 | Cpne7         |
| ENSMUST00000109485.8  | -0.130863186 | MGI:2444531 | Ralgapb       |
| ENSMUST00000114034.8  | -0.130863186 | MGI:2442689 | Lrrc49        |
| ENSMUST00000028617.6  | -0.130251525 | MGI:1888993 | Api5          |
| ENSMUST00000032065.14 | -0.130251525 | MGI:1914131 | Pcyox1        |
| ENSMUST00000064656.7  | -0.130251525 | MGI:2143676 | Zfp365        |
| ENSMUST00000106252.8  | -0.130251525 | MGI:96799   | Mycl          |
| ENSMUST00000047632.13 | -0.129634462 | MGI:98447   | Surf6         |
| ENSMUST00000039913.8  | -0.129457156 | MGI:2442752 | Tigar         |
| ENSMUST00000019268.10 | -0.129323882 | MGI:1917188 | Scrn1         |

|                       |              |             |               |
|-----------------------|--------------|-------------|---------------|
| ENSMUST0000009774.10  | -0.129136874 | MGI:1321161 | Ppp2cb        |
| ENSMUST00000099173.10 | -0.129136874 | MGI:1914454 | Eif2s2        |
| ENSMUST00000034630.14 | -0.128761361 | MGI:2670976 | Fez1          |
| ENSMUST00000203566.2  | -0.126457093 | MGI:1355332 | Myadm         |
| ENSMUST00000027684.10 | -0.125757553 | MGI:1915974 | Arl8a         |
| ENSMUST00000122375.7  | -0.125287742 | MGI:1918396 | Golga7b       |
| ENSMUST00000025181.17 | -0.124502052 | MGI:95904   | H2-K1         |
| ENSMUST00000088940.5  | -0.123843977 | MGI:1924356 | Tmem181a      |
| ENSMUST00000163123.2  | -0.123587112 | MGI:107956  | Slc8a1        |
| ENSMUST00000021466.9  | -0.123178668 | MGI:1921241 | Atl1          |
| ENSMUST00000068700.6  | -0.122917227 | MGI:1930140 | Wdr6          |
| ENSMUST00000002518.8  | -0.122110274 | MGI:95806   | Tle5          |
| ENSMUST00000033001.5  | -0.12151506  | MGI:1915050 | Dgat2         |
| ENSMUST00000043864.8  | -0.12151506  | MGI:2138811 | Cdc123        |
| ENSMUST00000115351.9  | -0.12151506  | MGI:97844   | Rab3d         |
| ENSMUST00000002790.13 | -0.120490015 | MGI:1339951 | Cse1l         |
| ENSMUST00000023460.6  | -0.12014518  | MGI:1915342 | Ncbp2         |
| ENSMUST00000031627.8  | -0.119389411 | MGI:2448536 | Pdap1         |
| ENSMUST00000023104.6  | -0.119145442 | MGI:1277218 | Rpap3         |
| ENSMUST00000053713.4  | -0.119145442 | MGI:2442159 | Irf2bp1       |
| ENSMUST00000146100.7  | -0.119145442 | MGI:1921265 | Fcho1         |
| ENSMUST00000154553.1  | -0.119145442 | MGI:1918689 | Sft2d1        |
| ENSMUST00000019854.12 | -0.117741419 | MGI:1914957 | Mrpl24        |
| ENSMUST00000026480.12 | -0.117741419 | MGI:1919604 | Ttc4          |
| ENSMUST00000102769.10 | -0.117741419 | MGI:1923786 | Mmadhc        |
| ENSMUST00000032949.13 | -0.115802816 | MGI:1345961 | Coro1a        |
| ENSMUST00000004560.11 | -0.115498021 | MGI:108093  | Bid           |
| ENSMUST00000070736.11 | -0.115498021 | MGI:108449  | Adcyap1r1     |
| ENSMUST00000006851.14 | -0.114279742 | MGI:1916482 | Qrich1        |
| ENSMUST00000008991.7  | -0.114279742 | MGI:1313261 | Sptbn2        |
| ENSMUST00000022701.6  | -0.114279742 | MGI:97874   | Rb1           |
| ENSMUST00000023687.8  | -0.114279742 | MGI:107654  | Ifngr2        |
| ENSMUST00000025590.10 | -0.114279742 | MGI:97447   | Osbp          |
| ENSMUST00000027040.12 | -0.114279742 | MGI:1341850 | Rb1cc1        |
| ENSMUST00000032899.11 | -0.114279742 | MGI:1929274 | 1110004F10Rik |
| ENSMUST00000034702.5  | -0.114279742 | MGI:1917332 | Lysmd2        |
| ENSMUST00000036540.11 | -0.114279742 | MGI:1920000 | Fam117b       |
| ENSMUST00000037488.7  | -0.114279742 | MGI:1918006 | Dock4         |
| ENSMUST00000038364.14 | -0.114279742 | MGI:2442179 | Fstl5         |

|                       |              |             |         |
|-----------------------|--------------|-------------|---------|
| ENSMUST00000046371.12 | -0.114279742 | MGI:2384575 | Plppr2  |
| ENSMUST00000052838.10 | -0.114279742 | MGI:2443157 | Mib1    |
| ENSMUST00000060945.11 | -0.114279742 | MGI:2136171 | Aff4    |
| ENSMUST00000061222.8  | -0.114279742 | MGI:2685141 | Kbtbd7  |
| ENSMUST00000069965.8  | -0.114279742 | MGI:97517   | Cdk17   |
| ENSMUST00000073899.5  | -0.114279742 | MGI:1859545 | Syt7    |
| ENSMUST00000076124.6  | -0.114279742 | MGI:1916205 | Srrm4   |
| ENSMUST00000087374.9  | -0.114279742 | MGI:1345162 | Adam23  |
| ENSMUST00000088452.10 | -0.114279742 | MGI:2145895 | Slc38a1 |
| ENSMUST00000093362.11 | -0.114279742 | MGI:1919296 | Urgcp   |
| ENSMUST00000106557.7  | -0.114279742 | MGI:2141942 | Ccp110  |
| ENSMUST00000121805.8  | -0.114279742 | MGI:1349762 | Dpysl3  |
| ENSMUST00000144211.1  | -0.114279742 | MGI:1920309 | Srrm3   |
| ENSMUST00000166873.8  | -0.114279742 | MGI:107436  | Cdh10   |
| ENSMUST00000189661.6  | -0.114279742 | MGI:104665  | Soat1   |
| ENSMUST00000207477.1  | -0.114279742 | MGI:2685951 | Myo16   |
| ENSMUST00000100244.9  | -0.11389344  | MGI:1860437 | Olfm1   |
| ENSMUST00000113364.9  | -0.11389344  | MGI:2442849 | Pcdh11x |
| ENSMUST00000066257.5  | -0.112324665 | MGI:893579  | Khdrbs1 |
| ENSMUST00000027185.10 | -0.112056176 | MGI:2144047 | Stradb  |
| ENSMUST00000047652.5  | -0.112056176 | MGI:1196325 | Tspan14 |
| ENSMUST00000070323.11 | -0.112056176 | MGI:1919253 | Synpr   |
| ENSMUST00000102889.9  | -0.112056176 | MGI:2140220 | Ecpas   |
| ENSMUST00000035155.7  | -0.111707974 | MGI:107283  | Rab6b   |
| ENSMUST00000025774.10 | -0.10820625  | MGI:2441856 | Sf3b2   |
| ENSMUST00000042990.6  | -0.10820625  | MGI:1914120 | Serbp1  |
| ENSMUST00000127206.7  | -0.10820625  | MGI:1098271 | Rgs2    |
| ENSMUST00000003912.6  | -0.107578225 | MGI:88252   | Calr    |
| ENSMUST00000022341.6  | -0.107578225 | MGI:1915295 | Rtraf   |
| ENSMUST00000127477.7  | -0.107578225 | MGI:1913296 | Ndufb5  |
| ENSMUST00000001319.14 | -0.10610553  | MGI:105097  | Efnb2   |
| ENSMUST00000001620.12 | -0.10610553  | MGI:104860  | Fxr1    |
| ENSMUST00000022954.6  | -0.10610553  | MGI:1313312 | Khdrbs3 |
| ENSMUST00000025215.9  | -0.10610553  | MGI:1932040 | Sil1    |
| ENSMUST00000027384.5  | -0.10610553  | MGI:1351352 | Atic    |
| ENSMUST00000033934.4  | -0.10610553  | MGI:1913153 | Mrps31  |
| ENSMUST00000036977.8  | -0.10610553  | MGI:2685015 | Mtg1    |
| ENSMUST00000065308.12 | -0.10610553  | MGI:1859169 | Azin1   |
| ENSMUST00000095224.10 | -0.10610553  | MGI:2146974 | Safb    |

|                       |              |             |         |
|-----------------------|--------------|-------------|---------|
| ENSMUST00000103212.9  | -0.10610553  | MGI:1927086 | Ube4b   |
| ENSMUST00000113822.2  | -0.10610553  | MGI:2385612 | Lrfn4   |
| ENSMUST00000161356.7  | -0.10610553  | MGI:103022  | Reln    |
| ENSMUST00000034699.7  | -0.105737898 | MGI:103032  | Scg3    |
| ENSMUST00000220041.1  | -0.105737898 | MGI:1858210 | Stx7    |
| ENSMUST00000000356.9  | -0.104853405 | MGI:1344344 | Dazap2  |
| ENSMUST00000028727.10 | -0.10460379  | MGI:98331   | Snap25  |
| ENSMUST00000169094.7  | -0.10456309  | MGI:2442040 | G3bp2   |
| ENSMUST00000021347.11 | -0.104493167 | MGI:1329016 | Sel1l   |
| ENSMUST00000091288.12 | -0.103787354 | MGI:97769   | Prnp    |
| ENSMUST00000044277.9  | -0.102421585 | MGI:1922858 | Chmp4b  |
| ENSMUST00000005548.7  | -0.102238569 | MGI:96163   | Hmox1   |
| ENSMUST00000050000.15 | -0.102148208 | MGI:107363  | Stxbp1  |
| ENSMUST00000116444.9  | -0.101920691 | MGI:1336200 | Hpca    |
| ENSMUST00000043951.9  | -0.101781172 | MGI:1917446 | Actr1b  |
| ENSMUST00000057598.6  | -0.101781172 | MGI:1920102 | Mblac2  |
| ENSMUST00000063091.12 | -0.101781172 | MGI:95602   | Fyn     |
| ENSMUST00000074616.6  | -0.101781172 | MGI:2145245 | Srek1   |
| ENSMUST00000102724.4  | -0.101781172 | MGI:109419  | Faf1    |
| ENSMUST00000037324.11 | -0.09922276  | MGI:103575  | Skp1a   |
| ENSMUST00000026987.11 | -0.099105276 | MGI:107862  | Nop16   |
| ENSMUST00000145910.8  | -0.099105276 | MGI:1333757 | Strn    |
| ENSMUST00000101045.9  | -0.098068801 | MGI:105368  | Atp2b2  |
| ENSMUST00000113278.8  | -0.098068801 | MGI:87977   | Ak1     |
| ENSMUST00000025421.8  | -0.097286137 | MGI:1919374 | Seh1l   |
| ENSMUST00000031862.13 | -0.097286137 | MGI:108515  | Cbx3    |
| ENSMUST00000057742.14 | -0.097286137 | MGI:1921270 | Cpne4   |
| ENSMUST00000000579.2  | -0.093329814 | MGI:98371   | Sox9    |
| ENSMUST00000020801.13 | -0.093329814 | MGI:1921383 | Smg8    |
| ENSMUST00000022310.6  | -0.093329814 | MGI:1913276 | Ngly1   |
| ENSMUST00000022855.11 | -0.093329814 | MGI:1915082 | Brix1   |
| ENSMUST00000023467.8  | -0.093329814 | MGI:1339984 | Pak2    |
| ENSMUST00000024958.8  | -0.093329814 | MGI:2442952 | Caskin1 |
| ENSMUST00000027287.10 | -0.093329814 | MGI:1931123 | Inpp4a  |
| ENSMUST00000029676.11 | -0.093329814 | MGI:1333882 | Adam15  |
| ENSMUST00000030032.12 | -0.093329814 | MGI:1926810 | Tmeff1  |
| ENSMUST00000030169.14 | -0.093329814 | MGI:1913842 | Stoml2  |
| ENSMUST00000030763.12 | -0.093329814 | MGI:894318  | Cdk14   |
| ENSMUST00000037977.14 | -0.093329814 | MGI:1196419 | Ccpg1   |



|                       |              |             |         |
|-----------------------|--------------|-------------|---------|
| ENSMUST00000038431.7  | -0.093329814 | MGI:1343087 | Pdk2    |
| ENSMUST00000041047.3  | -0.093329814 | MGI:2387123 | Lnpep   |
| ENSMUST00000041055.8  | -0.093329814 | MGI:1923809 | Atg2b   |
| ENSMUST00000045807.13 | -0.093329814 | MGI:2144566 | Tsr1    |
| ENSMUST00000048043.11 | -0.093329814 | MGI:2444283 | Coro2b  |
| ENSMUST00000048545.9  | -0.093329814 | MGI:2442985 | Arglu1  |
| ENSMUST00000054883.3  | -0.093329814 | MGI:102564  | Pou3f3  |
| ENSMUST00000059271.12 | -0.093329814 | MGI:2386964 | St7l    |
| ENSMUST00000062821.12 | -0.093329814 | MGI:2155091 | Emid1   |
| ENSMUST00000082408.1  | -0.093329814 | MGI:99927   | mt-Atp6 |
| ENSMUST00000085546.12 | -0.093329814 | MGI:96113   | Hmgb1   |
| ENSMUST00000088716.11 | -0.093329814 | MGI:1203524 | Smarcc1 |
| ENSMUST00000089017.11 | -0.093329814 | MGI:1196463 | Fndc3a  |
| ENSMUST00000101018.10 | -0.093329814 | MGI:2145043 | Cep170b |
| ENSMUST00000102518.9  | -0.093329814 | MGI:1101357 | Ece1    |
| ENSMUST00000102754.10 | -0.093329814 | MGI:109281  | Pkp4    |
| ENSMUST00000113026.1  | -0.093329814 | MGI:1914139 | Rnf128  |
| ENSMUST00000113337.9  | -0.093329814 | MGI:1861099 | Ubr2    |
| ENSMUST00000115050.9  | -0.093329814 | MGI:1915416 | Spire1  |
| ENSMUST00000115072.7  | -0.093329814 | MGI:1098583 | Stag2   |
| ENSMUST00000117654.2  | -0.093329814 | MGI:1100877 | Tbrg1   |
| ENSMUST00000136381.7  | -0.093329814 | MGI:2443155 | Sidt1   |
| ENSMUST00000138667.1  | -0.093329814 | MGI:5313163 | Gm20716 |
| ENSMUST00000145614.1  | -0.093329814 | MGI:1333830 | Mrps26  |
| ENSMUST00000150042.7  | -0.093329814 | MGI:1289321 | Mrpl48  |
| ENSMUST00000200137.4  | -0.093329814 | MGI:2676665 | Lrrc7   |
| ENSMUST00000209117.1  | -0.093329814 | MGI:1929510 | Zfand6  |
| ENSMUST00000122941.7  | -0.093042956 | MGI:1341890 | Zfr     |
| ENSMUST00000006692.5  | -0.091977386 | MGI:2179327 | Mvd     |
| ENSMUST00000021296.6  | -0.091505655 | MGI:1923797 | Tmem101 |
| ENSMUST00000025515.6  | -0.091505655 | MGI:2442418 | Tmx3    |
| ENSMUST00000027877.6  | -0.091505655 | MGI:107566  | Kifap3  |
| ENSMUST00000038388.6  | -0.091505655 | MGI:2441787 | Washc4  |
| ENSMUST00000054251.12 | -0.091505655 | MGI:1920393 | Wdr37   |
| ENSMUST00000098782.3  | -0.091505655 | MGI:2685357 | Layn    |
| ENSMUST00000102487.3  | -0.091505655 | MGI:1098672 | Szrd1   |
| ENSMUST00000111064.2  | -0.091505655 | MGI:108018  | Ntsr2   |
| ENSMUST00000144331.7  | -0.091505655 | MGI:105084  | Satb1   |
| ENSMUST00000003513.10 | -0.090579366 | MGI:1913644 | Nosip   |

|                       |              |             |          |
|-----------------------|--------------|-------------|----------|
| ENSMUST00000017552.12 | -0.090579366 | MGI:102522  | Cacnb1   |
| ENSMUST00000030315.12 | -0.090579366 | MGI:1931749 | Pum1     |
| ENSMUST00000032066.12 | -0.090579366 | MGI:98724   | Tgfa     |
| ENSMUST00000034738.13 | -0.090579366 | MGI:2681840 | Rsl24d1  |
| ENSMUST00000052761.8  | -0.090579366 | MGI:1099463 | Idh3g    |
| ENSMUST00000059595.10 | -0.090579366 | MGI:97595   | Prkca    |
| ENSMUST00000144668.7  | -0.090579366 | MGI:1914672 | Dhdds    |
| ENSMUST00000028335.12 | -0.09001896  | MGI:95819   | Grin1    |
| ENSMUST00000032457.16 | -0.09001896  | MGI:1921494 | Atg7     |
| ENSMUST00000002737.6  | -0.089643405 | MGI:1913650 | Alkbh7   |
| ENSMUST00000025955.7  | -0.089643405 | MGI:95301   | Eif3a    |
| ENSMUST00000071329.7  | -0.089643405 | MGI:107701  | Bckdha   |
| ENSMUST00000106333.7  | -0.089643405 | MGI:2385295 | Sez6l2   |
| ENSMUST00000035033.6  | -0.08937419  | MGI:1354962 | Copb2    |
| ENSMUST00000100729.8  | -0.08937419  | MGI:1914401 | Psmc9    |
| ENSMUST00000114340.8  | -0.08917175  | MGI:87918   | Add1     |
| ENSMUST00000115816.2  | -0.089013983 | MGI:1932407 | Celf4    |
| ENSMUST00000000896.10 | -0.08888757  | MGI:1891701 | Pxmp4    |
| ENSMUST00000042664.9  | -0.08888757  | MGI:1203732 | Slc16a2  |
| ENSMUST00000180095.3  | -0.088113023 | MGI:1353554 | Mlf2     |
| ENSMUST00000026704.13 | -0.08621086  | MGI:107183  | Cct8     |
| ENSMUST00000039659.8  | -0.085697102 | MGI:88284   | Cbr1     |
| ENSMUST00000015435.10 | -0.085439576 | MGI:99846   | Gdi1     |
| ENSMUST00000023750.8  | -0.085107834 | MGI:1919643 | Faim2    |
| ENSMUST00000097739.4  | -0.084664395 | MGI:2443342 | Pgap1    |
| ENSMUST00000007012.5  | -0.08267197  | MGI:98352   | Sod2     |
| ENSMUST00000072580.11 | -0.082427857 | MGI:3039582 | Lmtk3    |
| ENSMUST00000027502.15 | -0.08152411  | MGI:1913865 | Atg4b    |
| ENSMUST00000065358.8  | -0.08152411  | MGI:1913449 | Commd4   |
| ENSMUST00000230931.1  | -0.08152411  | MGI:1914161 | Nudt16l1 |
| ENSMUST00000198199.4  | -0.080504723 | MGI:99458   | Mef2c    |
| ENSMUST00000062991.8  | -0.080249971 | MGI:1334416 | Grpel2   |
| ENSMUST00000076349.11 | -0.080249971 | MGI:95810   | Gria3    |
| ENSMUST00000006027.6  | -0.079265387 | MGI:1270152 | Reep5    |
| ENSMUST00000021243.15 | -0.078319049 | MGI:1343133 | Slc35b1  |
| ENSMUST00000023069.8  | -0.078319049 | MGI:1920475 | Fam118a  |
| ENSMUST00000026625.6  | -0.078319049 | MGI:1916884 | Clybl    |
| ENSMUST00000043498.8  | -0.078319049 | MGI:1343091 | Hdac3    |
| ENSMUST00000045450.6  | -0.078319049 | MGI:1924315 | Ints7    |

|                       |              |             |          |
|-----------------------|--------------|-------------|----------|
| ENSMUST00000045898.3  | -0.078319049 | MGI:2147987 | Pcyt1b   |
| ENSMUST00000056820.12 | -0.078319049 | MGI:1334255 | Cyth2    |
| ENSMUST00000102814.4  | -0.078319049 | MGI:98159   | Rps6     |
| ENSMUST00000117798.7  | -0.078319049 | MGI:2143792 | Zfr2     |
| ENSMUST00000159879.1  | -0.078319049 | MGI:106652  | Ro60     |
| ENSMUST00000209469.1  | -0.075139246 | MGI:101757  | Cfl1     |
| ENSMUST00000031383.13 | -0.075133662 | MGI:1333112 | Ran      |
| ENSMUST00000091201.6  | -0.075115894 | MGI:2442308 | Arl15    |
| ENSMUST00000034392.12 | -0.075101118 | MGI:1913414 | Nip7     |
| ENSMUST00000000365.2  | -0.075047179 | MGI:1916245 | Mcts1    |
| ENSMUST00000002198.3  | -0.075047179 | MGI:1914715 | Sf3a1    |
| ENSMUST00000017365.14 | -0.075047179 | MGI:98858   | Psmc3    |
| ENSMUST00000021443.6  | -0.075047179 | MGI:1342005 | Mthfd1   |
| ENSMUST00000032476.10 | -0.075047179 | MGI:95757   | Slc2a3   |
| ENSMUST00000049074.12 | -0.075047179 | MGI:102695  | Ptprf    |
| ENSMUST00000093138.12 | -0.075047179 | MGI:1924045 | Tbc1d9b  |
| ENSMUST00000097588.8  | -0.075047179 | MGI:109605  | Srgap2   |
| ENSMUST00000102973.3  | -0.075047179 | MGI:87879   | Aco1     |
| ENSMUST00000102989.9  | -0.075047179 | MGI:1202298 | Nmt2     |
| ENSMUST00000206832.1  | -0.075047179 | MGI:2443517 | Hnrnpul1 |
| ENSMUST00000110890.7  | -0.07469167  | MGI:97759   | Prkar1b  |
| ENSMUST00000047357.9  | -0.072882102 | MGI:1861601 | Cpsf2    |
| ENSMUST00000067744.7  | -0.072882102 | MGI:2146370 | Cggbp1   |
| ENSMUST00000020717.11 | -0.071305908 | MGI:99434   | Arf5     |
| ENSMUST00000079746.9  | -0.070236313 | MGI:1201685 | Ctbp1    |
| ENSMUST00000047281.9  | -0.070074349 | MGI:1922833 | Trir     |
| ENSMUST00000081982.11 | -0.069718118 | MGI:2139080 | Dzank1   |
| ENSMUST00000115524.7  | -0.069718118 | MGI:1915291 | Mid1ip1  |
| ENSMUST00000006462.13 | -0.068367334 | MGI:107809  | Aamp     |
| ENSMUST00000071026.9  | -0.068367334 | MGI:106248  | Eif5a    |
| ENSMUST00000002280.10 | -0.068294443 | MGI:1919247 | Smg9     |
| ENSMUST00000003436.11 | -0.068294443 | MGI:106388  | Abhd17a  |
| ENSMUST00000004036.5  | -0.068294443 | MGI:109196  | Efnb3    |
| ENSMUST00000018803.11 | -0.068294443 | MGI:2144151 | Pnpo     |
| ENSMUST00000020270.5  | -0.068294443 | MGI:2182303 | Ddx50    |
| ENSMUST00000020681.9  | -0.068294443 | MGI:2385598 | Slu7     |
| ENSMUST00000021085.10 | -0.068294443 | MGI:3046173 | Nup85    |
| ENSMUST00000023165.8  | -0.068294443 | MGI:1098280 | Crebbp   |
| ENSMUST00000025503.9  | -0.068294443 | MGI:1913557 | Isoc1    |

|                       |              |             |          |
|-----------------------|--------------|-------------|----------|
| ENSMUST00000026135.14 | -0.068294443 | MGI:1916188 | Aspscr1  |
| ENSMUST00000026994.13 | -0.068294443 | MGI:894682  | Unc5a    |
| ENSMUST00000028841.13 | -0.068294443 | MGI:1934029 | Usp8     |
| ENSMUST00000032754.8  | -0.068294443 | MGI:107559  | Sema4b   |
| ENSMUST00000033006.13 | -0.068294443 | MGI:1914961 | Nsmce1   |
| ENSMUST00000033828.6  | -0.068294443 | MGI:95660   | Gas6     |
| ENSMUST00000034121.10 | -0.068294443 | MGI:107286  | Man2b1   |
| ENSMUST00000035242.8  | -0.068294443 | MGI:105065  | Rab24    |
| ENSMUST00000038890.5  | -0.068294443 | MGI:2142979 | Dennd4a  |
| ENSMUST00000040017.7  | -0.068294443 | MGI:2182066 | Mios     |
| ENSMUST00000043775.8  | -0.068294443 | MGI:1923356 | Kdm3b    |
| ENSMUST00000046687.15 | -0.068294443 | MGI:2385287 | Spon1    |
| ENSMUST00000055935.10 | -0.068294443 | MGI:1935205 | Pcdhgc5  |
| ENSMUST00000057293.7  | -0.068294443 | MGI:2679002 | Prr12    |
| ENSMUST00000061047.6  | -0.068294443 | MGI:2138327 | Phlpp1   |
| ENSMUST00000064454.11 | -0.068294443 | MGI:2444248 | Gcn1     |
| ENSMUST00000074875.10 | -0.068294443 | MGI:2385848 | Bcas3    |
| ENSMUST00000076734.7  | -0.068294443 | MGI:1925212 | Scaf8    |
| ENSMUST00000077626.12 | -0.068294443 | MGI:3039607 | Pigu     |
| ENSMUST00000092794.11 | -0.068294443 | MGI:1923876 | Msi2     |
| ENSMUST00000093772.3  | -0.068294443 | MGI:2670992 | Zfp651   |
| ENSMUST00000094340.3  | -0.068294443 | MGI:2181178 | Mkrn3    |
| ENSMUST00000095220.3  | -0.068294443 | MGI:1915878 | Fbxw9    |
| ENSMUST00000095852.4  | -0.068294443 | MGI:95813   | Grid2    |
| ENSMUST00000109445.8  | -0.068294443 | MGI:1321152 | Ptptrt   |
| ENSMUST00000110516.2  | -0.068294443 | MGI:2444115 | Hecw1    |
| ENSMUST00000110865.1  | -0.068294443 | MGI:2442201 | Adap1    |
| ENSMUST00000112606.7  | -0.068294443 | MGI:2442409 | Dpp10    |
| ENSMUST00000112736.7  | -0.068294443 | MGI:1100499 | Vps4b    |
| ENSMUST00000113504.9  | -0.068294443 | MGI:1316736 | Men1     |
| ENSMUST00000114355.1  | -0.068294443 | MGI:1916096 | Rnf208   |
| ENSMUST00000117549.7  | -0.068294443 | MGI:2154580 | Ube4a    |
| ENSMUST00000118592.7  | -0.068294443 | MGI:2445022 | Ccdc186  |
| ENSMUST00000119261.7  | -0.068294443 | MGI:2446249 | Edc4     |
| ENSMUST00000165665.8  | -0.068294443 | MGI:1916882 | Arhgef12 |
| ENSMUST00000182006.3  | -0.068294443 | MGI:5439400 | lqschfp  |
| ENSMUST00000185072.7  | -0.068294443 | MGI:5435040 | Entpd4b  |
| ENSMUST00000191234.6  | -0.068294443 | MGI:1923447 | Nkain2   |
| ENSMUST00000200758.3  | -0.068294443 | MGI:105098  | Ube3a    |

|                       |              |             |          |
|-----------------------|--------------|-------------|----------|
| ENSMUST00000217854.1  | -0.068294443 | MGI:2443834 | Ppfia2   |
| ENSMUST00000224047.1  | -0.068294443 | MGI:1333811 | Mbd1     |
| ENSMUST00000238937.1  | -0.068294443 | MGI:1923019 | Plppr5   |
| ENSMUST00000022429.8  | -0.067903174 | MGI:99433   | Arf4     |
| ENSMUST00000043520.4  | -0.065180293 | MGI:1914072 | Fbxo25   |
| ENSMUST00000142456.1  | -0.065180293 | MGI:6303253 | Gm50364  |
| ENSMUST00000005798.8  | -0.064842233 | MGI:1919433 | Snx6     |
| ENSMUST00000030586.14 | -0.064842233 | MGI:1913514 | Ccdc28b  |
| ENSMUST00000031167.5  | -0.064842233 | MGI:2388280 | Polr2b   |
| ENSMUST00000033839.8  | -0.064842233 | MGI:1913673 | Coprs    |
| ENSMUST00000035227.7  | -0.064842233 | MGI:1913507 | Nicn1    |
| ENSMUST00000036211.7  | -0.064842233 | MGI:101909  | Gpr12    |
| ENSMUST00000040434.8  | -0.064842233 | MGI:1919976 | Tbcc     |
| ENSMUST00000042844.6  | -0.064842233 | MGI:104591  | Nbl1     |
| ENSMUST00000049149.14 | -0.064842233 | MGI:96828   | Lrp1     |
| ENSMUST00000055262.12 | -0.064842233 | MGI:1855688 | Vti1b    |
| ENSMUST00000059045.7  | -0.064842233 | MGI:1923576 | Exosc4   |
| ENSMUST00000068825.7  | -0.064842233 | MGI:1889001 | Nub1     |
| ENSMUST00000069652.7  | -0.064842233 | MGI:1916043 | Rab3gap2 |
| ENSMUST00000105097.2  | -0.064842233 | MGI:1914513 | Zswim6   |
| ENSMUST00000119068.7  | -0.064842233 | MGI:1920152 | Spock3   |
| ENSMUST00000139167.2  | -0.064842233 | MGI:1923776 | Gatc     |
| ENSMUST00000144950.7  | -0.064842233 | MGI:1914285 | Dnajb4   |
| ENSMUST00000193254.5  | -0.064842233 | MGI:88041   | Apeh     |
| ENSMUST00000040766.8  | -0.063665054 | MGI:1915831 | Tmed10   |
| ENSMUST00000167861.7  | -0.063333099 | MGI:1914366 | Cuedc2   |
| ENSMUST00000103045.3  | -0.063111264 | MGI:1277137 | Stmn3    |
| ENSMUST00000018431.12 | -0.063071377 | MGI:107380  | Spag7    |
| ENSMUST00000057525.13 | -0.063071377 | MGI:1860040 | Trim3    |
| ENSMUST00000077755.10 | -0.061827361 | MGI:1915021 | Arpc5    |
| ENSMUST00000160507.7  | -0.059699685 | MGI:1306775 | Sucla2   |
| ENSMUST00000081769.12 | -0.059268925 | MGI:1329025 | Edil3    |
| ENSMUST00000085192.6  | -0.059173736 | MGI:1915077 | Aldh6a1  |
| ENSMUST00000024005.7  | -0.058735585 | MGI:98289   | Scg5     |
| ENSMUST00000035034.9  | -0.058330097 | MGI:1928137 | Mrps22   |
| ENSMUST00000089140.12 | -0.058330097 | MGI:3042273 | Nsfl1c   |
| ENSMUST00000089378.4  | -0.058330097 | MGI:1919282 | Pdyp     |
| ENSMUST00000114513.8  | -0.058330097 | MGI:95752   | Gls      |
| ENSMUST00000031160.15 | -0.057583074 | MGI:1914304 | Paics    |

|                       |              |             |           |
|-----------------------|--------------|-------------|-----------|
| ENSMUST00000015800.15 | -0.05729881  | MGI:105384  | Hspa8     |
| ENSMUST00000018156.11 | -0.056349759 | MGI:2180784 | Rac3      |
| ENSMUST00000023762.12 | -0.056349759 | MGI:1919199 | Cers5     |
| ENSMUST00000024620.7  | -0.056349759 | MGI:1914295 | Riok2     |
| ENSMUST00000025305.15 | -0.056349759 | MGI:1914223 | Mrps18b   |
| ENSMUST00000039303.6  | -0.056349759 | MGI:104963  | Npy1r     |
| ENSMUST00000041905.7  | -0.056349759 | MGI:6121524 | Gm49336   |
| ENSMUST00000043464.13 | -0.056349759 | MGI:1913765 | Cul7      |
| ENSMUST00000044509.6  | -0.056349759 | MGI:106244  | Tspyl2    |
| ENSMUST00000044851.7  | -0.056349759 | MGI:1935229 | Pcdhga12  |
| ENSMUST00000060531.15 | -0.056349759 | MGI:1922368 | Lrrc8d    |
| ENSMUST00000065904.4  | -0.056349759 | MGI:1354960 | Hs6st3    |
| ENSMUST00000076532.13 | -0.056349759 | MGI:103123  | Serpinb6a |
| ENSMUST00000084953.12 | -0.056349759 | MGI:1341865 | Mark3     |
| ENSMUST00000164843.7  | -0.056349759 | MGI:88263   | Capn1     |
| ENSMUST00000209885.1  | -0.056349759 | MGI:101934  | Tfdp1     |
| ENSMUST00000220377.1  | -0.056349759 | MGI:101857  | Usp15     |
| ENSMUST00000102928.4  | -0.055708796 | MGI:700006  | Dbnl      |
| ENSMUST00000128646.7  | -0.055708796 | MGI:2659021 | Phactr1   |
| ENSMUST00000233514.2  | -0.055708796 | MGI:1924140 | Memo1     |
| ENSMUST00000046983.9  | -0.053032097 | MGI:98325   | Smpd1     |
| ENSMUST00000021148.12 | -0.052954474 | MGI:1914378 | Ube2g1    |
| ENSMUST00000168846.2  | -0.052954474 | MGI:108411  | Prkag1    |
| ENSMUST00000067664.9  | -0.052878271 | MGI:894689  | Ywhae     |
| ENSMUST00000100497.10 | -0.051114204 | MGI:87904   | Actb      |
| ENSMUST00000023686.14 | -0.050712491 | MGI:1925225 | Tmem50b   |
| ENSMUST00000111416.6  | -0.050496786 | MGI:1196370 | Ildr2     |
| ENSMUST00000146623.7  | -0.050496786 | MGI:1289257 | Gpd1l     |
| ENSMUST00000195612.1  | -0.050089023 | MGI:1353609 | Zbtb18    |
| ENSMUST00000024873.6  | -0.049957725 | MGI:1915114 | Yipf4     |
| ENSMUST00000030738.7  | -0.049957725 | MGI:1914455 | Utp11     |
| ENSMUST00000033999.7  | -0.049957725 | MGI:893597  | Frg1      |
| ENSMUST00000034303.2  | -0.049957725 | MGI:1915783 | Mphosph6  |
| ENSMUST00000066039.7  | -0.049957725 | MGI:1932622 | Cstf2t    |
| ENSMUST00000115995.3  | -0.049957725 | MGI:1928740 | Fads3     |
| ENSMUST00000165316.7  | -0.049957725 | MGI:2145219 | Iars      |
| ENSMUST00000105367.7  | -0.049497569 | MGI:1913293 | Atp5d     |
| ENSMUST00000000175.5  | -0.04849507  | MGI:1914175 | Sdhd      |
| ENSMUST00000021332.9  | -0.04849507  | MGI:1353460 | Fkbp3     |

|                       |              |             |          |
|-----------------------|--------------|-------------|----------|
| ENSMUST00000022494.9  | -0.045976681 | MGI:1915427 | Ebpl     |
| ENSMUST00000022867.4  | -0.045976681 | MGI:1890494 | Laptm4b  |
| ENSMUST00000038107.8  | -0.045976681 | MGI:1306784 | Cited2   |
| ENSMUST00000041139.8  | -0.045976681 | MGI:2442982 | Rab8b    |
| ENSMUST00000116468.1  | -0.045976681 | MGI:1922589 | Mphosph8 |
| ENSMUST00000163765.2  | -0.045976681 | MGI:2181182 | Nup155   |
| ENSMUST00000021197.9  | -0.045952291 | MGI:1345186 | Blmh     |
| ENSMUST00000030896.14 | -0.045952291 | MGI:1915058 | Tprgl    |
| ENSMUST00000170953.2  | -0.045931195 | MGI:1915302 | Rps13    |
| ENSMUST00000008297.4  | -0.044327573 | MGI:2178323 | Clstn3   |
| ENSMUST00000025679.10 | -0.043258965 | MGI:2147616 | Otub1    |
| ENSMUST00000114059.9  | -0.043258965 | MGI:104807  | Pls3     |
| ENSMUST00000006496.14 | -0.042984745 | MGI:1924096 | Rps9     |
| ENSMUST00000020522.8  | -0.041285575 | MGI:97547   | Pfkl     |
| ENSMUST00000028123.3  | -0.041285575 | MGI:95634   | Gad2     |
| ENSMUST00000061925.4  | -0.041285575 | MGI:2442605 | Plcx3    |
| ENSMUST00000113482.7  | -0.041285575 | MGI:2443699 | Fubp3    |
| ENSMUST00000022977.13 | -0.040894692 | MGI:109296  | Sqle     |
| ENSMUST00000003720.4  | -0.039787556 | MGI:1921364 | Crot     |
| ENSMUST00000105675.7  | -0.039655866 | MGI:2135637 | Park7    |
| ENSMUST00000177005.7  | -0.038611604 | MGI:1913318 | GImp     |
| ENSMUST00000164756.3  | -0.038525215 | MGI:1889651 | Eid1     |
| ENSMUST00000002844.13 | -0.037844295 | MGI:1351622 | Mrpl2    |
| ENSMUST00000016323.10 | -0.037844295 | MGI:2388073 | Camk1g   |
| ENSMUST00000023113.6  | -0.037844295 | MGI:1926179 | Polr3h   |
| ENSMUST00000025462.6  | -0.037844295 | MGI:1915981 | Rbfa     |
| ENSMUST00000025520.9  | -0.037844295 | MGI:2147363 | Slc6a7   |
| ENSMUST00000025827.9  | -0.037844295 | MGI:1336159 | Minpp1   |
| ENSMUST00000026670.4  | -0.037844295 | MGI:107811  | Nptx1    |
| ENSMUST00000026827.15 | -0.037844295 | MGI:1915597 | Mettl26  |
| ENSMUST00000027856.12 | -0.037844295 | MGI:1921356 | Dcaf6    |
| ENSMUST00000028829.12 | -0.037844295 | MGI:2150016 | Spred1   |
| ENSMUST00000029574.12 | -0.037844295 | MGI:98926   | Vcam1    |
| ENSMUST00000030010.3  | -0.037844295 | MGI:99607   | Abca1    |
| ENSMUST00000030138.8  | -0.037844295 | MGI:2140151 | Nol6     |
| ENSMUST00000030879.11 | -0.037844295 | MGI:1347049 | Clcn6    |
| ENSMUST00000031617.12 | -0.037844295 | MGI:108057  | Rpl6     |
| ENSMUST00000033575.6  | -0.037844295 | MGI:2148316 | Magee2   |
| ENSMUST00000033929.5  | -0.037844295 | MGI:1341087 | Tnks     |

|                       |              |             |          |
|-----------------------|--------------|-------------|----------|
| ENSMUST00000034204.10 | -0.037844295 | MGI:1915469 | Nudt21   |
| ENSMUST00000034243.6  | -0.037844295 | MGI:109320  | Mmp15    |
| ENSMUST00000035645.11 | -0.037844295 | MGI:2140371 | Rusc2    |
| ENSMUST00000035973.4  | -0.037844295 | MGI:1914705 | Klh13    |
| ENSMUST00000037557.8  | -0.037844295 | MGI:1914324 | Mon2     |
| ENSMUST00000038369.10 | -0.037844295 | MGI:1919185 | Cipc     |
| ENSMUST00000038551.7  | -0.037844295 | MGI:1921075 | Ppp1r21  |
| ENSMUST00000039259.6  | -0.037844295 | MGI:3580016 | Agap2    |
| ENSMUST00000039674.12 | -0.037844295 | MGI:2445415 | Pknox2   |
| ENSMUST00000040021.11 | -0.037844295 | MGI:2144837 | Ptpn23   |
| ENSMUST00000040787.12 | -0.037844295 | MGI:2139746 | Ankrd13c |
| ENSMUST00000041369.7  | -0.037844295 | MGI:2385459 | Socs5    |
| ENSMUST00000046709.8  | -0.037844295 | MGI:1890948 | Supt16   |
| ENSMUST00000049020.8  | -0.037844295 | MGI:2667176 | Irgq     |
| ENSMUST00000050248.8  | -0.037844295 | MGI:2443876 | Zbtb11   |
| ENSMUST00000054014.8  | -0.037844295 | MGI:1914290 | Ddx17    |
| ENSMUST00000057783.5  | -0.037844295 | MGI:1920260 | Gpr22    |
| ENSMUST00000058326.5  | -0.037844295 | MGI:1354373 | Sall2    |
| ENSMUST00000059250.7  | -0.037844295 | MGI:1196337 | Brms1l   |
| ENSMUST00000059498.11 | -0.037844295 | MGI:1914217 | Edem3    |
| ENSMUST00000060396.6  | -0.037844295 | MGI:1914703 | Slc25a46 |
| ENSMUST00000063042.10 | -0.037844295 | MGI:88151   | Glb1     |
| ENSMUST00000064371.13 | -0.037844295 | MGI:1923484 | Magi3    |
| ENSMUST00000066439.7  | -0.037844295 | MGI:1351611 | Exoc6    |
| ENSMUST00000066743.10 | -0.037844295 | MGI:2448562 | Adnp2    |
| ENSMUST00000076463.11 | -0.037844295 | MGI:1915776 | Gpr155   |
| ENSMUST00000077282.6  | -0.037844295 | MGI:2147749 | Atrnl1   |
| ENSMUST00000085585.11 | -0.037844295 | MGI:1914320 | Lsm14a   |
| ENSMUST00000087556.6  | -0.037844295 | MGI:2385088 | Smc5     |
| ENSMUST00000095027.8  | -0.037844295 | MGI:106927  | Aff3     |
| ENSMUST00000095074.3  | -0.037844295 | MGI:1919154 | Paqr7    |
| ENSMUST00000096495.10 | -0.037844295 | MGI:1349442 | Med14    |
| ENSMUST00000100784.8  | -0.037844295 | MGI:103309  | Flot2    |
| ENSMUST00000102715.3  | -0.037844295 | MGI:1858416 | Stk39    |
| ENSMUST00000103109.3  | -0.037844295 | MGI:1858201 | Cntnap1  |
| ENSMUST00000106017.7  | -0.037844295 | MGI:2451244 | Adgrb2   |
| ENSMUST00000106930.7  | -0.037844295 | MGI:1919935 | Dnajc6   |
| ENSMUST00000107153.2  | -0.037844295 | MGI:2682305 | Rsf1     |
| ENSMUST00000107894.7  | -0.037844295 | MGI:1889276 | Dgke     |



|                       |              |             |          |
|-----------------------|--------------|-------------|----------|
| ENSMUST00000109554.2  | -0.037844295 | MGI:1328310 | Zc3h7b   |
| ENSMUST00000109860.7  | -0.037844295 | MGI:1915769 | Eml1     |
| ENSMUST00000111030.5  | -0.037844295 | MGI:108360  | Enah     |
| ENSMUST00000111605.8  | -0.037844295 | MGI:2446193 | Tnks1bp1 |
| ENSMUST00000113493.7  | -0.037844295 | MGI:2445020 | Exoc1    |
| ENSMUST00000118316.7  | -0.037844295 | MGI:2687207 | N4bp2l2  |
| ENSMUST00000121465.2  | -0.037844295 | MGI:1914098 | Fuca2    |
| ENSMUST00000163139.7  | -0.037844295 | MGI:107685  | Plxna1   |
| ENSMUST00000172809.1  | -0.037844295 | MGI:2384801 | Gps1     |
| ENSMUST00000174552.7  | -0.037844295 | MGI:1920179 | Dip2c    |
| ENSMUST00000201185.3  | -0.037844295 | MGI:95851   | Gsn      |
| ENSMUST00000214828.1  | -0.037844295 | MGI:2384573 | Ttc13    |
| ENSMUST00000022927.10 | -0.037663936 | MGI:108016  | Rad21    |
| ENSMUST00000025208.6  | -0.037663936 | MGI:1923844 | Dnajc18  |
| ENSMUST00000033913.10 | -0.035198435 | MGI:1343154 | Dctn6    |
| ENSMUST00000000188.11 | -0.034921239 | MGI:88314   | Ccnd2    |
| ENSMUST00000014640.8  | -0.034921239 | MGI:2145661 | Ankrd28  |
| ENSMUST00000020217.6  | -0.034921239 | MGI:1918457 | Nudt4    |
| ENSMUST00000027975.7  | -0.034921239 | MGI:891978  | Phyh     |
| ENSMUST00000031597.6  | -0.034921239 | MGI:1919022 | Plbd2    |
| ENSMUST00000032172.13 | -0.034921239 | MGI:1913348 | Chchd6   |
| ENSMUST00000034878.11 | -0.034921239 | MGI:106402  | Tmem30a  |
| ENSMUST00000034946.14 | -0.034921239 | MGI:1928395 | Snx1     |
| ENSMUST00000035237.11 | -0.034921239 | MGI:98905   | Usp4     |
| ENSMUST00000035612.6  | -0.034921239 | MGI:2444228 | Ccar2    |
| ENSMUST00000040455.4  | -0.034921239 | MGI:2442345 | Hif1an   |
| ENSMUST00000057438.6  | -0.034921239 | MGI:1917925 | Vcpip1   |
| ENSMUST00000068519.6  | -0.034921239 | MGI:2444661 | Susd6    |
| ENSMUST00000076219.5  | -0.034921239 | MGI:106253  | Pum3     |
| ENSMUST00000084731.4  | -0.034921239 | MGI:2152414 | lpo7     |
| ENSMUST00000093923.8  | -0.034921239 | MGI:102685  | Cdc27    |
| ENSMUST00000097275.8  | -0.034921239 | MGI:97599   | Prkce    |
| ENSMUST00000098534.8  | -0.034921239 | MGI:1916996 | Znhit6   |
| ENSMUST00000102636.3  | -0.034921239 | MGI:1915300 | Akirin1  |
| ENSMUST00000102869.7  | -0.034921239 | MGI:2144013 | Xpo1     |
| ENSMUST00000103092.8  | -0.034921239 | MGI:97748   | Ctsa     |
| ENSMUST00000165007.8  | -0.034921239 | MGI:2651568 | Klhdc3   |
| ENSMUST00000234107.1  | -0.034921239 | MGI:1929211 | Rnf138   |
| ENSMUST00000036493.7  | -0.033960719 | MGI:88105   | Atp1a1   |

|                       |              |             |          |
|-----------------------|--------------|-------------|----------|
| ENSMUST00000029881.9  | -0.033431882 | MGI:1276107 | Mmp16    |
| ENSMUST00000030675.7  | -0.033431882 | MGI:1913657 | Mrps15   |
| ENSMUST00000061789.13 | -0.033431882 | MGI:2443880 | Nyap1    |
| ENSMUST00000068664.6  | -0.033431882 | MGI:1097159 | Neo1     |
| ENSMUST00000074541.5  | -0.033431882 | MGI:2141450 | Jazf1    |
| ENSMUST00000098143.10 | -0.033431882 | MGI:1921414 | Nfx1     |
| ENSMUST00000147535.7  | -0.033111749 | MGI:96759   | Ldha     |
| ENSMUST00000025053.9  | -0.032529158 | MGI:1927238 | Mllt1    |
| ENSMUST00000027498.13 | -0.032529158 | MGI:1891699 | Stk25    |
| ENSMUST00000040010.9  | -0.032529158 | MGI:1099460 | Rbm3     |
| ENSMUST00000087195.8  | -0.032529158 | MGI:1916377 | Ociad2   |
| ENSMUST00000109787.7  | -0.032529158 | MGI:106374  | Zmiz2    |
| ENSMUST00000111234.9  | -0.032529158 | MGI:1352474 | Tnfrsf19 |
| ENSMUST00000215836.1  | -0.032529158 | MGI:106387  | Arfgef3  |
| ENSMUST00000015891.5  | -0.031923498 | MGI:891965  | Vps45    |
| ENSMUST00000160884.8  | -0.031923498 | MGI:109239  | Kcnab2   |
| ENSMUST00000025474.13 | -0.031845448 | MGI:104561  | Napg     |
| ENSMUST00000007251.13 | -0.031488985 | MGI:99476   | Abhd16a  |
| ENSMUST00000051484.4  | -0.031488985 | MGI:1922875 | Mageh1   |
| ENSMUST00000102944.10 | -0.031488985 | MGI:99946   | Creb3    |
| ENSMUST00000106370.9  | -0.030535419 | MGI:1921569 | Mettl23  |
| ENSMUST00000197748.4  | -0.030395719 | MGI:2159711 | Usp33    |
| ENSMUST00000106650.8  | -0.025249889 | MGI:1917158 | Rab3b    |
| ENSMUST00000103118.3  | -0.024689961 | MGI:1343101 | Kat2a    |
| ENSMUST00000033156.4  | -0.023533258 | MGI:1891689 | Dctn5    |
| ENSMUST00000166411.7  | -0.023423841 | MGI:98423   | Ssb      |
| ENSMUST00000233741.1  | -0.022811105 | MGI:1913846 | Gtf3a    |
| ENSMUST00000021523.6  | -0.02204231  | MGI:106207  | Mnat1    |
| ENSMUST00000046212.1  | -0.02204231  | MGI:106013  | Slc16a1  |
| ENSMUST00000047404.6  | -0.02204231  | MGI:2135610 | Dync1li1 |
| ENSMUST00000080001.8  | -0.02204231  | MGI:1913405 | Ufc1     |
| ENSMUST00000159916.4  | -0.02204231  | MGI:1916267 | Prrt2    |
| ENSMUST00000169825.7  | -0.02129575  | MGI:105980  | Cntn1    |
| ENSMUST00000237341.1  | -0.021064967 | MGI:2385079 | Ndufs8   |
| ENSMUST00000025684.3  | -0.021049135 | MGI:1341878 | Ehd1     |
| ENSMUST00000044369.12 | -0.021049135 | MGI:1914864 | Atp6v1h  |
| ENSMUST00000077938.9  | -0.021049135 | MGI:1919877 | Haghl    |
| ENSMUST00000046206.4  | -0.020263123 | MGI:2385066 | Rprd1a   |
| ENSMUST00000003319.5  | -0.019716564 | MGI:1351656 | Abcf3    |

|                       |              |             |               |
|-----------------------|--------------|-------------|---------------|
| ENSMUST00000025695.9  | -0.019716564 | MGI:2388480 | Ppp2r5b       |
| ENSMUST00000031423.9  | -0.019716564 | MGI:88110   | Atp2a2        |
| ENSMUST00000034529.13 | -0.019716564 | MGI:1922967 | Cul5          |
| ENSMUST00000035608.9  | -0.019716564 | MGI:1355331 | Olig2         |
| ENSMUST00000067120.13 | -0.019716564 | MGI:87888   | Chrna4        |
| ENSMUST00000070112.5  | -0.019716564 | MGI:1915625 | Ndufa8        |
| ENSMUST00000086046.9  | -0.019716564 | MGI:1278343 | Nipsnap2      |
| ENSMUST00000102927.9  | -0.019716564 | MGI:1338068 | Pdpc1         |
| ENSMUST00000174697.1  | -0.019716564 | MGI:2444389 | Tmem229b      |
| ENSMUST00000023291.5  | -0.017834773 | MGI:1926555 | Mapk8ip2      |
| ENSMUST00000026479.10 | -0.017834773 | MGI:107733  | Dctn2         |
| ENSMUST00000036509.13 | -0.017834773 | MGI:1920995 | Ubac1         |
| ENSMUST00000057551.13 | -0.017834773 | MGI:108402  | Slbp          |
| ENSMUST00000065534.9  | -0.017834773 | MGI:1346331 | Def8          |
| ENSMUST00000031565.14 | -0.017031882 | MGI:1352745 | Fscn1         |
| ENSMUST00000020496.13 | -0.014976084 | MGI:891999  | Adarb1        |
| ENSMUST00000037942.10 | -0.014976084 | MGI:1918142 | Ttll7         |
| ENSMUST00000039571.13 | -0.014976084 | MGI:1913671 | 2410004B18Rik |
| ENSMUST00000042148.5  | -0.014976084 | MGI:1913480 | Mrps28        |
| ENSMUST00000047226.9  | -0.014976084 | MGI:1921392 | Lonp1         |
| ENSMUST00000092623.4  | -0.014976084 | MGI:1920030 | Rspo3         |
| ENSMUST00000171737.2  | -0.014976084 | MGI:97402   | Odc1          |
| ENSMUST00000037615.6  | -0.012384385 | MGI:2441982 | Aldh5a1       |
| ENSMUST00000150576.7  | -0.012384385 | MGI:99687   | Rpl29         |
| ENSMUST0000006035.12  | -0.012167678 | MGI:1913616 | Ergic3        |
| ENSMUST00000151287.7  | -0.012167678 | MGI:98535   | Tcp1          |
| ENSMUST00000024727.9  | -0.011508712 | MGI:1918952 | Cdc5l         |
| ENSMUST00000004868.5  | -0.0101131   | MGI:1916686 | Mtftp1        |
| ENSMUST00000013737.12 | -0.0101131   | MGI:2385112 | Ndufs2        |
| ENSMUST00000021692.8  | -0.0101131   | MGI:99150   | Yy1           |
| ENSMUST00000025786.8  | -0.0101131   | MGI:1277113 | Pacs1         |
| ENSMUST00000026126.9  | -0.0101131   | MGI:1917164 | Ints4         |
| ENSMUST00000027139.14 | -0.0101131   | MGI:1920924 | Wdr75         |
| ENSMUST00000027517.13 | -0.0101131   | MGI:2138334 | Dgkd          |
| ENSMUST00000027521.14 | -0.0101131   | MGI:2653690 | Agap1         |
| ENSMUST00000027979.13 | -0.0101131   | MGI:1341908 | Uhmk1         |
| ENSMUST00000031977.11 | -0.0101131   | MGI:1917173 | Agk           |
| ENSMUST00000034079.13 | -0.0101131   | MGI:2444491 | Heatr3        |
| ENSMUST00000037814.7  | -0.0101131   | MGI:2447164 | Cmtm5         |

|                       |              |             |          |
|-----------------------|--------------|-------------|----------|
| ENSMUST00000038498.9  | -0.0101131   | MGI:1914634 | Bag4     |
| ENSMUST00000047629.6  | -0.0101131   | MGI:1096573 | Utp4     |
| ENSMUST00000049474.8  | -0.0101131   | MGI:1923041 | Fbxw8    |
| ENSMUST00000053218.6  | -0.0101131   | MGI:1920347 | Dact2    |
| ENSMUST00000064285.14 | -0.0101131   | MGI:2179717 | Glcci1   |
| ENSMUST00000066497.11 | -0.0101131   | MGI:1929704 | Zfp24    |
| ENSMUST00000090046.11 | -0.0101131   | MGI:2441844 | Tmem87a  |
| ENSMUST00000094917.9  | -0.0101131   | MGI:2138365 | Tmem237  |
| ENSMUST00000102748.10 | -0.0101131   | MGI:1931053 | Marchf7  |
| ENSMUST00000103101.10 | -0.0101131   | MGI:1926178 | Pigt     |
| ENSMUST00000113239.9  | -0.0101131   | MGI:1913277 | Crbn     |
| ENSMUST00000192509.5  | -0.0101131   | MGI:1349394 | Map4k4   |
| ENSMUST00000200607.4  | -0.0101131   | MGI:1344349 | Rnf216   |
| ENSMUST00000208222.1  | -0.0101131   | MGI:1922997 | Sesn3    |
| ENSMUST00000232732.1  | -0.0101131   | MGI:96957   | Mea1     |
| ENSMUST00000034567.3  | -0.009900215 | MGI:2385311 | Dlat     |
| ENSMUST00000022062.7  | -0.008868854 | MGI:1914195 | Sdha     |
| ENSMUST00000047973.3  | -0.007410404 | MGI:1922004 | Dhcr24   |
| ENSMUST00000223160.1  | -0.007410404 | MGI:2137354 | Trim9    |
| ENSMUST00000006828.8  | -0.007239093 | MGI:88046   | Aplp1    |
| ENSMUST00000023040.8  | -0.006785697 | MGI:1342248 | Slc25a17 |
| ENSMUST00000031190.4  | -0.006533156 | MGI:1100515 | Dr1      |
| ENSMUST00000040275.8  | -0.006533156 | MGI:1924427 | Sobp     |
| ENSMUST00000041901.6  | -0.006533156 | MGI:1929293 | Cib2     |
| ENSMUST00000033008.9  | -0.006234104 | MGI:1347005 | Psma1    |
| ENSMUST00000229641.1  | -0.005317769 | MGI:98857   | Tsta3    |
| ENSMUST00000071718.11 | -0.005207019 | MGI:894320  | Prdx6    |
| ENSMUST00000004057.8  | -0.002567296 | MGI:1917436 | Fam162a  |
| ENSMUST00000015049.4  | -0.002138956 | MGI:1351618 | Dnajb9   |
| ENSMUST00000028917.6  | -0.002138956 | MGI:1913294 | Dtd1     |
| ENSMUST00000022704.8  | -0.00193205  | MGI:1309517 | Itm2b    |
| ENSMUST00000002445.9  | -0.001710799 | MGI:1919060 | Ranbp3   |
| ENSMUST00000031334.14 | -0.001710799 | MGI:2384802 | Eif2b1   |
| ENSMUST00000055117.8  | -0.001710799 | MGI:2385045 | Lemd2    |
| ENSMUST00000064637.10 | -0.001710799 | MGI:109483  | Rnf103   |
| ENSMUST00000071926.4  | -0.001710799 | MGI:1917328 | Nol7     |
| ENSMUST00000079213.5  | -0.001710799 | MGI:1916962 | Prpf38a  |
| ENSMUST00000114976.8  | -0.001710799 | MGI:1914228 | Luc7l    |
| ENSMUST00000000275.8  | 0            | MGI:95749   | Gira3    |

|                       |   |             |               |
|-----------------------|---|-------------|---------------|
| ENSMUST0000000384.7   | 0 | MGI:1336209 | Trappc10      |
| ENSMUST0000000901.12  | 0 | MGI:1888986 | Dlg3          |
| ENSMUST00000001415.8  | 0 | MGI:108404  | Apbb3         |
| ENSMUST00000002825.5  | 0 | MGI:1353499 | Baz1b         |
| ENSMUST00000002837.10 | 0 | MGI:1921586 | Tmed5         |
| ENSMUST00000003434.13 | 0 | MGI:1933831 | Btbd2         |
| ENSMUST00000003843.15 | 0 | MGI:104677  | Man1a         |
| ENSMUST00000005616.15 | 0 | MGI:108022  | Pkn1          |
| ENSMUST00000010421.6  | 0 | MGI:1919753 | 2610507B11Rik |
| ENSMUST00000011302.8  | 0 | MGI:1919558 | Brf1          |
| ENSMUST00000012580.12 | 0 | MGI:2153839 | Hps3          |
| ENSMUST00000012679.14 | 0 | MGI:1196412 | Tnpo3         |
| ENSMUST00000013130.14 | 0 | MGI:2151064 | Strn3         |
| ENSMUST00000013931.11 | 0 | MGI:2148922 | Ehmt2         |
| ENSMUST00000015449.5  | 0 | MGI:1917347 | Sash1         |
| ENSMUST00000015605.14 | 0 | MGI:105121  | Atf6b         |
| ENSMUST00000016771.12 | 0 | MGI:107717  | Myh9          |
| ENSMUST00000016907.7  | 0 | MGI:1890616 | Scube1        |
| ENSMUST00000017783.12 | 0 | MGI:2442920 | Rab11fip4     |
| ENSMUST00000018304.6  | 0 | MGI:1100846 | Med1          |
| ENSMUST00000018716.9  | 0 | MGI:1925496 | Phf23         |
| ENSMUST00000018909.3  | 0 | MGI:1346074 | Fxr2          |
| ENSMUST00000019220.15 | 0 | MGI:2142346 | Strn4         |
| ENSMUST00000019791.13 | 0 | MGI:1203727 | Sema6a        |
| ENSMUST00000020112.6  | 0 | MGI:2442888 | Uhrf1bp1l     |
| ENSMUST00000020159.14 | 0 | MGI:1917458 | Med23         |
| ENSMUST00000020251.9  | 0 | MGI:3643902 | Gnptab        |
| ENSMUST00000020329.12 | 0 | MGI:95294   | Egfr          |
| ENSMUST00000020339.9  | 0 | MGI:1913937 | Tbc1d15       |
| ENSMUST00000020420.8  | 0 | MGI:107734  | Ap3d1         |
| ENSMUST00000020463.13 | 0 | MGI:1926081 | Ncln          |
| ENSMUST00000020513.9  | 0 | MGI:2442119 | Papolg        |
| ENSMUST00000020552.6  | 0 | MGI:106618  | Tpgs1         |
| ENSMUST00000020756.8  | 0 | MGI:1918951 | Pnpt1         |
| ENSMUST00000020904.7  | 0 | MGI:107926  | Rock2         |
| ENSMUST00000020909.3  | 0 | MGI:108017  | Laptm4a       |
| ENSMUST00000021209.7  | 0 | MGI:1100497 | Doc2b         |
| ENSMUST00000021335.6  | 0 | MGI:1924233 | Scfd1         |
| ENSMUST00000021900.13 | 0 | MGI:109244  | Sema4d        |

|                       |   |             |         |
|-----------------------|---|-------------|---------|
| ENSMUST00000022153.7  | 0 | MGI:1916177 | Ptcd2   |
| ENSMUST00000022666.8  | 0 | MGI:2136335 | Klhl1   |
| ENSMUST00000022707.6  | 0 | MGI:1194894 | Gpc5    |
| ENSMUST00000022793.14 | 0 | MGI:1891824 | Acin1   |
| ENSMUST00000022890.9  | 0 | MGI:1353623 | Rnf19a  |
| ENSMUST00000022947.6  | 0 | MGI:109613  | Matn2   |
| ENSMUST00000023211.15 | 0 | MGI:1913331 | Sharpin |
| ENSMUST00000023561.7  | 0 | MGI:1923076 | Senp2   |
| ENSMUST00000023689.10 | 0 | MGI:107658  | Ifnar1  |
| ENSMUST00000024860.8  | 0 | MGI:1928900 | Ehd3    |
| ENSMUST00000025186.15 | 0 | MGI:95909   | Slc39a7 |
| ENSMUST00000025377.13 | 0 | MGI:1920180 | Ppp2r2b |
| ENSMUST00000025729.11 | 0 | MGI:1921743 | Tnks2   |
| ENSMUST00000025993.9  | 0 | MGI:1315203 | Slit1   |
| ENSMUST00000026220.6  | 0 | MGI:1353437 | Scd3    |
| ENSMUST00000026886.7  | 0 | MGI:1925751 | Itih5   |
| ENSMUST00000026897.13 | 0 | MGI:1351867 | Slco3a1 |
| ENSMUST00000026972.7  | 0 | MGI:2136853 | Fam20c  |
| ENSMUST00000027580.10 | 0 | MGI:1921400 | Slc35f5 |
| ENSMUST00000027725.10 | 0 | MGI:2385619 | Klhl12  |
| ENSMUST00000027752.14 | 0 | MGI:99914   | Lamc1   |
| ENSMUST00000028667.9  | 0 | MGI:1278339 | Dgkz    |
| ENSMUST00000028767.8  | 0 | MGI:1309480 | Rtf1    |
| ENSMUST00000028944.3  | 0 | MGI:1915988 | Acss1   |
| ENSMUST00000029141.5  | 0 | MGI:1341867 | Mmp24   |
| ENSMUST00000029480.8  | 0 | MGI:1914171 | Prpf38b |
| ENSMUST00000029667.12 | 0 | MGI:1924937 | Kcnq5   |
| ENSMUST00000029740.13 | 0 | MGI:1915095 | Rnf115  |
| ENSMUST00000029891.11 | 0 | MGI:1919348 | Tmem68  |
| ENSMUST00000030471.8  | 0 | MGI:2441984 | Lrrc41  |
| ENSMUST00000030769.5  | 0 | MGI:109555  | Psmc2   |
| ENSMUST00000030884.9  | 0 | MGI:2442230 | Mfn2    |
| ENSMUST00000030917.5  | 0 | MGI:98310   | Ski     |
| ENSMUST00000030922.14 | 0 | MGI:97602   | Prkcz   |
| ENSMUST00000031519.13 | 0 | MGI:1352750 | Cabp1   |
| ENSMUST00000031554.8  | 0 | MGI:1921794 | Tmem168 |
| ENSMUST00000031859.13 | 0 | MGI:109275  | Trim24  |
| ENSMUST00000032105.10 | 0 | MGI:107935  | Lrig1   |
| ENSMUST00000032151.2  | 0 | MGI:1914142 | Eif4e3  |

|                       |   |             |          |
|-----------------------|---|-------------|----------|
| ENSMUST00000032719.14 | 0 | MGI:2183703 | Nav3     |
| ENSMUST00000032892.6  | 0 | MGI:2451073 | Xylt1    |
| ENSMUST00000032978.7  | 0 | MGI:1201407 | Sh2b1    |
| ENSMUST00000033058.13 | 0 | MGI:1921831 | Sbf2     |
| ENSMUST00000033158.5  | 0 | MGI:107301  | Ubfd1    |
| ENSMUST00000033163.7  | 0 | MGI:1914862 | Mettl9   |
| ENSMUST00000033341.11 | 0 | MGI:2651573 | Tub      |
| ENSMUST00000034074.7  | 0 | MGI:2136825 | N4bp1    |
| ENSMUST00000034085.7  | 0 | MGI:1349766 | Brd7     |
| ENSMUST00000034141.15 | 0 | MGI:1914137 | Lonp2    |
| ENSMUST00000034225.6  | 0 | MGI:2183572 | Cntnap4  |
| ENSMUST00000034296.14 | 0 | MGI:1098772 | Pik3r2   |
| ENSMUST00000034411.9  | 0 | MGI:2182585 | Med17    |
| ENSMUST00000034453.5  | 0 | MGI:87902   | Acta1    |
| ENSMUST00000034469.6  | 0 | MGI:1932286 | Egln1    |
| ENSMUST00000034510.8  | 0 | MGI:1926483 | Nectin1  |
| ENSMUST00000034592.9  | 0 | MGI:2150309 | Dscaml1  |
| ENSMUST00000034960.13 | 0 | MGI:1921638 | Dpp8     |
| ENSMUST00000035010.9  | 0 | MGI:1915542 | Stt3b    |
| ENSMUST00000035177.14 | 0 | MGI:2137204 | Mrpl3    |
| ENSMUST00000035214.10 | 0 | MGI:1351633 | Ip6k1    |
| ENSMUST00000035462.6  | 0 | MGI:2442948 | Dsel     |
| ENSMUST00000036113.3  | 0 | MGI:2652878 | Tbc1d16  |
| ENSMUST00000036161.11 | 0 | MGI:2448506 | Pi4ka    |
| ENSMUST00000037012.2  | 0 | MGI:96661   | Kcna4    |
| ENSMUST00000037472.12 | 0 | MGI:2142195 | Leng8    |
| ENSMUST00000037649.5  | 0 | MGI:2445001 | Rab3gap1 |
| ENSMUST00000037788.5  | 0 | MGI:2444430 | Pomt2    |
| ENSMUST00000038116.12 | 0 | MGI:1914357 | Ankrd12  |
| ENSMUST00000038237.7  | 0 | MGI:1351333 | Thoc5    |
| ENSMUST00000038574.6  | 0 | MGI:2145374 | Dhx29    |
| ENSMUST00000038696.11 | 0 | MGI:2387581 | Ppp1r9b  |
| ENSMUST00000038794.5  | 0 | MGI:2443967 | Dpp9     |
| ENSMUST00000039061.14 | 0 | MGI:2444585 | Trappc11 |
| ENSMUST00000040280.13 | 0 | MGI:1914222 | Slc25a23 |
| ENSMUST00000040700.8  | 0 | MGI:106321  | Dock9    |
| ENSMUST00000040992.7  | 0 | MGI:2387995 | Nek9     |
| ENSMUST00000041415.4  | 0 | MGI:1341723 | Kcnh3    |
| ENSMUST00000041683.8  | 0 | MGI:2144157 | Usp22    |

|                       |   |             |          |
|-----------------------|---|-------------|----------|
| ENSMUST00000041723.14 | 0 | MGI:2445110 | Zdhhc17  |
| ENSMUST00000041956.13 | 0 | MGI:1918084 | Spag9    |
| ENSMUST00000042057.11 | 0 | MGI:1890222 | Midn     |
| ENSMUST00000042365.8  | 0 | MGI:1916812 | Cdk13    |
| ENSMUST00000042700.11 | 0 | MGI:95864   | Gstp2    |
| ENSMUST00000043200.7  | 0 | MGI:1917030 | Smap2    |
| ENSMUST00000043368.11 | 0 | MGI:2445126 | Tut4     |
| ENSMUST00000043531.9  | 0 | MGI:1922937 | Ripor1   |
| ENSMUST00000043599.6  | 0 | MGI:1920336 | Rps6ka5  |
| ENSMUST00000043725.8  | 0 | MGI:3643623 | Cntnap5a |
| ENSMUST00000043938.7  | 0 | MGI:1352756 | Plcl2    |
| ENSMUST00000044455.7  | 0 | MGI:2137896 | Zfp451   |
| ENSMUST00000044532.10 | 0 | MGI:2429763 | Dock3    |
| ENSMUST00000044616.9  | 0 | MGI:1919906 | Ints8    |
| ENSMUST00000044624.7  | 0 | MGI:3521816 | Kcnk9    |
| ENSMUST00000044858.15 | 0 | MGI:98215   | Rxb      |
| ENSMUST00000045540.3  | 0 | MGI:2651588 | Socs7    |
| ENSMUST00000045713.3  | 0 | MGI:3603030 | Nacad    |
| ENSMUST00000045847.14 | 0 | MGI:109637  | Erf      |
| ENSMUST00000045903.7  | 0 | MGI:1914345 | Trak1    |
| ENSMUST00000046521.13 | 0 | MGI:1924828 | Bcl9     |
| ENSMUST00000046548.13 | 0 | MGI:1891468 | Lgr4     |
| ENSMUST00000047037.14 | 0 | MGI:2442413 | Thoc2    |
| ENSMUST00000047086.9  | 0 | MGI:1919765 | Wdr43    |
| ENSMUST00000047232.13 | 0 | MGI:2443065 | Agps     |
| ENSMUST00000047903.9  | 0 | MGI:1924348 | Colgalt1 |
| ENSMUST00000048002.6  | 0 | MGI:2652891 | B4galnt4 |
| ENSMUST00000048138.6  | 0 | MGI:109581  | S100a13  |
| ENSMUST00000048418.13 | 0 | MGI:2444611 | Ipo8     |
| ENSMUST00000048519.16 | 0 | MGI:2661416 | Snx13    |
| ENSMUST00000048706.9  | 0 | MGI:1354944 | Orc3     |
| ENSMUST00000048896.7  | 0 | MGI:104648  | Fbrs     |
| ENSMUST00000048966.6  | 0 | MGI:108399  | Tcf20    |
| ENSMUST00000049146.11 | 0 | MGI:2686228 | Ephx4    |
| ENSMUST00000049206.5  | 0 | MGI:1918954 | Arhgef3  |
| ENSMUST00000049956.4  | 0 | MGI:3605040 | Lrrc24   |
| ENSMUST00000051139.12 | 0 | MGI:2444993 | Rsb1     |
| ENSMUST00000052179.7  | 0 | MGI:2136758 | Pcdhb20  |
| ENSMUST00000052245.8  | 0 | MGI:1921094 | Ankrd45  |



|                       |   |             |           |
|-----------------------|---|-------------|-----------|
| ENSMUST00000052249.6  | 0 | MGI:1919064 | Mrps27    |
| ENSMUST00000052550.12 | 0 | MGI:2151136 | Lrp1b     |
| ENSMUST00000053491.8  | 0 | MGI:101896  | Pou3f1    |
| ENSMUST00000053699.12 | 0 | MGI:1917604 | Secisbp2l |
| ENSMUST00000053764.6  | 0 | MGI:1890077 | Foxo1     |
| ENSMUST00000054245.7  | 0 | MGI:2685490 | Tmem132e  |
| ENSMUST00000055931.4  | 0 | MGI:1922469 | Dusp18    |
| ENSMUST00000056919.8  | 0 | MGI:88547   | Csnk2a2   |
| ENSMUST00000057028.14 | 0 | MGI:1916947 | Camsap3   |
| ENSMUST00000057416.7  | 0 | MGI:2443862 | Tmem251   |
| ENSMUST00000057795.11 | 0 | MGI:1913489 | Rsrc2     |
| ENSMUST00000058150.7  | 0 | MGI:96816   | Lor       |
| ENSMUST00000058470.15 | 0 | MGI:98086   | Polr2a    |
| ENSMUST00000058856.8  | 0 | MGI:2670997 | Scd4      |
| ENSMUST00000058860.13 | 0 | MGI:99961   | Usf2      |
| ENSMUST00000060043.12 | 0 | MGI:2442092 | Wnk1      |
| ENSMUST00000061772.10 | 0 | MGI:2443205 | Rbm15     |
| ENSMUST00000062528.8  | 0 | MGI:1346069 | Cdh20     |
| ENSMUST00000063761.7  | 0 | MGI:2446526 | Cpt1c     |
| ENSMUST00000064091.11 | 0 | MGI:1099792 | Ptpn4     |
| ENSMUST00000064174.11 | 0 | MGI:2443629 | Cemip     |
| ENSMUST00000064444.7  | 0 | MGI:2684896 | Maneal    |
| ENSMUST00000064795.5  | 0 | MGI:95295   | Egr1      |
| ENSMUST00000065263.11 | 0 | MGI:2384298 | Sbno1     |
| ENSMUST00000065330.7  | 0 | MGI:1098670 | Clk3      |
| ENSMUST00000065630.7  | 0 | MGI:1924841 | Ddx10     |
| ENSMUST00000065858.2  | 0 | MGI:2444609 | Nlgn3     |
| ENSMUST00000066058.7  | 0 | MGI:1347004 | Mapkbp1   |
| ENSMUST00000066958.10 | 0 | MGI:1341873 | Gfra4     |
| ENSMUST00000067219.4  | 0 | MGI:1890446 | Dach2     |
| ENSMUST00000068681.11 | 0 | MGI:1858414 | Ngef      |
| ENSMUST00000073441.12 | 0 | MGI:2682334 | Smg7      |
| ENSMUST00000073572.10 | 0 | MGI:103025  | Mtx1      |
| ENSMUST00000074729.5  | 0 | MGI:2444188 | Dgkh      |
| ENSMUST00000074840.11 | 0 | MGI:1355326 | Preb      |
| ENSMUST00000076698.12 | 0 | MGI:108081  | Sypl      |
| ENSMUST00000076810.11 | 0 | MGI:2685385 | Kalrn     |
| ENSMUST00000077273.8  | 0 | MGI:894663  | Ext1      |
| ENSMUST00000077972.10 | 0 | MGI:2139014 | Osbpl6    |

|                       |   |             |          |
|-----------------------|---|-------------|----------|
| ENSMUST00000078308.12 | 0 | MGI:2443881 | Rasal2   |
| ENSMUST00000079176.13 | 0 | MGI:1351469 | Plekhb1  |
| ENSMUST00000079300.12 | 0 | MGI:1918053 | Arhgef26 |
| ENSMUST00000079817.7  | 0 | MGI:2385007 | Stk24    |
| ENSMUST00000080030.13 | 0 | MGI:1316728 | Gspt1    |
| ENSMUST00000080036.2  | 0 | MGI:96067   | Htt      |
| ENSMUST00000080123.1  | 0 | MGI:1931052 | Aldoat2  |
| ENSMUST00000080437.12 | 0 | MGI:1201681 | Dennd5a  |
| ENSMUST00000081635.12 | 0 | MGI:1927450 | St7      |
| ENSMUST00000082034.12 | 0 | MGI:1914321 | Rps6ka6  |
| ENSMUST00000082392.1  | 0 | MGI:101787  | mt-Nd1   |
| ENSMUST00000082396.1  | 0 | MGI:102500  | mt-Nd2   |
| ENSMUST00000082402.1  | 0 | MGI:102504  | mt-Co1   |
| ENSMUST00000082405.1  | 0 | MGI:102503  | mt-Co2   |
| ENSMUST00000082409.1  | 0 | MGI:102502  | mt-Co3   |
| ENSMUST00000082418.1  | 0 | MGI:102496  | mt-Nd5   |
| ENSMUST00000082419.1  | 0 | MGI:102495  | mt-Nd6   |
| ENSMUST00000082421.1  | 0 | MGI:102501  | mt-Cytb  |
| ENSMUST00000084299.5  | 0 | MGI:1889364 | Akirin2  |
| ENSMUST00000084894.14 | 0 | MGI:5804952 | Gm45837  |
| ENSMUST00000085678.7  | 0 | MGI:2444629 | Kctd3    |
| ENSMUST00000086395.6  | 0 | MGI:2686146 | Gpr25    |
| ENSMUST00000087200.3  | 0 | MGI:95764   | Gnl1     |
| ENSMUST00000087867.5  | 0 | MGI:2685620 | Uprt     |
| ENSMUST00000088174.3  | 0 | MGI:1354958 | Hs6st1   |
| ENSMUST00000088516.9  | 0 | MGI:1354953 | Magi2    |
| ENSMUST00000088737.10 | 0 | MGI:87940   | Grk2     |
| ENSMUST00000088786.10 | 0 | MGI:98419   | Sri      |
| ENSMUST00000089645.12 | 0 | MGI:1928676 | Htra2    |
| ENSMUST00000090247.6  | 0 | MGI:1927230 | Trio     |
| ENSMUST00000091039.4  | 0 | MGI:1922008 | Ralgps1  |
| ENSMUST00000091497.10 | 0 | MGI:1919850 | Frmd4a   |
| ENSMUST00000091694.9  | 0 | MGI:2444879 | Ripor2   |
| ENSMUST00000093393.4  | 0 | MGI:1918560 | Tbc1d9   |
| ENSMUST00000093468.11 | 0 | MGI:1918215 | Psd3     |
| ENSMUST00000093820.9  | 0 | MGI:2442675 | Rfx7     |
| ENSMUST00000094933.4  | 0 | MGI:1919936 | Usp24    |
| ENSMUST00000095310.2  | 0 | MGI:2443807 | Osbpl8   |
| ENSMUST00000096275.4  | 0 | MGI:3528396 | lqsec2   |

|                       |   |             |               |
|-----------------------|---|-------------|---------------|
| ENSMUST00000096987.6  | 0 | MGI:1195461 | Septin5       |
| ENSMUST00000097561.8  | 0 | MGI:88549   | Csrp1         |
| ENSMUST00000097650.9  | 0 | MGI:1342770 | Lrrfip1       |
| ENSMUST00000098098.8  | 0 | MGI:1920719 | Rnf38         |
| ENSMUST00000099337.4  | 0 | MGI:1890127 | Plxnc1        |
| ENSMUST00000099931.10 | 0 | MGI:2155278 | Sesn1         |
| ENSMUST00000100309.2  | 0 | MGI:2146159 | Alg10b        |
| ENSMUST00000100327.9  | 0 | MGI:1921463 | Rbm26         |
| ENSMUST00000100337.9  | 0 | MGI:1353586 | Lmo7          |
| ENSMUST00000101118.3  | 0 | MGI:1929059 | Rybp          |
| ENSMUST00000101141.8  | 0 | MGI:107194  | Shroom2       |
| ENSMUST00000101638.3  | 0 | MGI:1197517 | Limk2         |
| ENSMUST00000102592.9  | 0 | MGI:98759   | Tjp1          |
| ENSMUST00000102637.7  | 0 | MGI:88016   | Ampd2         |
| ENSMUST00000102689.9  | 0 | MGI:1277166 | Sp3           |
| ENSMUST00000102694.3  | 0 | MGI:1277114 | Ptgrn         |
| ENSMUST00000102838.9  | 0 | MGI:98388   | Sptbn1        |
| ENSMUST00000102872.10 | 0 | MGI:104580  | Rapgef1       |
| ENSMUST00000105584.9  | 0 | MGI:2153589 | Acap3         |
| ENSMUST00000105902.7  | 0 | MGI:2671987 | Shank2        |
| ENSMUST00000106108.8  | 0 | MGI:1915035 | Zmym4         |
| ENSMUST00000106226.8  | 0 | MGI:107913  | Tial1         |
| ENSMUST00000106550.10 | 0 | MGI:1913606 | Knop1         |
| ENSMUST00000106600.8  | 0 | MGI:107427  | Elavl4        |
| ENSMUST00000106625.9  | 0 | MGI:1923930 | 5330417C22Rik |
| ENSMUST00000106939.8  | 0 | MGI:1346023 | Tlk2          |
| ENSMUST00000107170.2  | 0 | MGI:1934229 | Setdb1        |
| ENSMUST00000107359.8  | 0 | MGI:1918264 | Megf9         |
| ENSMUST00000107478.8  | 0 | MGI:3588195 | Adamts17      |
| ENSMUST00000107479.2  | 0 | MGI:3611446 | Rapgef11      |
| ENSMUST00000107865.8  | 0 | MGI:2441680 | Tmem8b        |
| ENSMUST00000108153.8  | 0 | MGI:1329041 | Rngtt         |
| ENSMUST00000108285.8  | 0 | MGI:1915349 | Fam92a        |
| ENSMUST00000108588.8  | 0 | MGI:1277959 | Dlg4          |
| ENSMUST00000108661.7  | 0 | MGI:1344395 | Chd3          |
| ENSMUST00000108682.8  | 0 | MGI:1202388 | Gas7          |
| ENSMUST00000109158.8  | 0 | MGI:2443183 | Mia3          |
| ENSMUST00000109645.8  | 0 | MGI:2384826 | Vstm2a        |
| ENSMUST00000109691.3  | 0 | MGI:2444365 | Rapgef5       |

|                       |   |             |           |
|-----------------------|---|-------------|-----------|
| ENSMUST00000109923.8  | 0 | MGI:1931838 | Dbn1      |
| ENSMUST00000110097.8  | 0 | MGI:1922857 | Wnk2      |
| ENSMUST00000110746.1  | 0 | MGI:5663654 | Gm43517   |
| ENSMUST00000111091.7  | 0 | MGI:1917353 | Znhit1    |
| ENSMUST00000111346.5  | 0 | MGI:2443235 | Rimbp2    |
| ENSMUST00000111690.7  | 0 | MGI:105100  | Ctnnd1    |
| ENSMUST00000112096.8  | 0 | MGI:1859162 | Rnf10     |
| ENSMUST00000112098.10 | 0 | MGI:1923998 | Pbrm1     |
| ENSMUST00000112498.2  | 0 | MGI:1354756 | Crim1     |
| ENSMUST00000112512.7  | 0 | MGI:96958   | Golga3    |
| ENSMUST00000112588.8  | 0 | MGI:99781   | Kdm5c     |
| ENSMUST00000113533.2  | 0 | MGI:1913656 | Sac3d1    |
| ENSMUST00000113878.7  | 0 | MGI:2442233 | Arhgef9   |
| ENSMUST00000114112.3  | 0 | MGI:1339963 | St3gal5   |
| ENSMUST00000114167.8  | 0 | MGI:3036242 | Camsap1   |
| ENSMUST00000114881.8  | 0 | MGI:1914347 | Rps10     |
| ENSMUST00000115366.2  | 0 | MGI:101924  | Slc12a2   |
| ENSMUST00000115797.8  | 0 | MGI:1926129 | Arid1b    |
| ENSMUST00000116238.8  | 0 | MGI:96103   | Hk1       |
| ENSMUST00000116388.3  | 0 | MGI:106340  | Rcor1     |
| ENSMUST00000116574.9  | 0 | MGI:1861755 | Nsmf      |
| ENSMUST00000117085.1  | 0 | MGI:1917428 | Abhd17c   |
| ENSMUST00000117245.1  | 0 | MGI:2138319 | Trp53bp2  |
| ENSMUST00000117661.8  | 0 | MGI:2151156 | Stim2     |
| ENSMUST00000118444.2  | 0 | MGI:3584516 | Lrp3      |
| ENSMUST00000119339.7  | 0 | MGI:2443713 | Ythdc1    |
| ENSMUST00000120194.1  | 0 | MGI:106351  | Fam104a   |
| ENSMUST00000121212.8  | 0 | MGI:1098669 | Clk2      |
| ENSMUST00000122103.8  | 0 | MGI:2444431 | Rab11fip3 |
| ENSMUST00000128187.7  | 0 | MGI:1355299 | Hnrnpdl   |
| ENSMUST00000129241.2  | 0 | MGI:98386   | Sptan1    |
| ENSMUST00000129423.7  | 0 | MGI:1889007 | Ttyh1     |
| ENSMUST00000130379.8  | 0 | MGI:2147134 | Fbxo11    |
| ENSMUST00000130451.1  | 0 | MGI:1914647 | Erp29     |
| ENSMUST00000131070.1  | 0 | MGI:96412   | Ide       |
| ENSMUST00000138410.7  | 0 | MGI:1921303 | Grip1     |
| ENSMUST00000139517.8  | 0 | MGI:1916329 | Sgsm3     |
| ENSMUST00000139666.7  | 0 | MGI:1314653 | Afdn      |
| ENSMUST00000149154.7  | 0 | MGI:2685563 | Pcdh19    |

|                       |   |             |               |
|-----------------------|---|-------------|---------------|
| ENSMUST00000154078.2  | 0 | MGI:2685104 | Akap5         |
| ENSMUST00000155487.7  | 0 | MGI:1913881 | Mfsd14b       |
| ENSMUST00000159038.7  | 0 | MGI:2442786 | Mfsd4a        |
| ENSMUST00000159081.7  | 0 | MGI:109474  | Commd1        |
| ENSMUST00000159124.7  | 0 | MGI:96567   | Impdh1        |
| ENSMUST00000159295.7  | 0 | MGI:106341  | Atp5o         |
| ENSMUST00000159295.7  | 0 | MGI:106341  | Atp5o         |
| ENSMUST00000159295.7  | 0 | MGI:106341  | Atp5o         |
| ENSMUST00000159295.7  | 0 | MGI:106341  | Atp5o         |
| ENSMUST00000159952.7  | 0 | MGI:5547772 | Gm28036       |
| ENSMUST00000160378.2  | 0 | MGI:109182  | Acat3         |
| ENSMUST00000162144.1  | 0 | MGI:1918161 | Phyhipl       |
| ENSMUST00000163065.7  | 0 | MGI:102810  | Lmo3          |
| ENSMUST00000163370.7  | 0 | MGI:103306  | Tiam1         |
| ENSMUST00000164107.2  | 0 | MGI:88141   | Bcr           |
| ENSMUST00000164950.10 | 0 | MGI:107238  | Tmem191c      |
| ENSMUST00000165937.7  | 0 | MGI:3611233 | Tox2          |
| ENSMUST00000166429.8  | 0 | MGI:2443679 | Sipa1l1       |
| ENSMUST00000167926.7  | 0 | MGI:1917275 | Acot7         |
| ENSMUST00000168076.1  | 0 | MGI:2147269 | Slc39a3       |
| ENSMUST00000168386.8  | 0 | MGI:3605626 | Prr36         |
| ENSMUST00000168579.7  | 0 | MGI:1933438 | Slc16a3       |
| ENSMUST00000169035.7  | 0 | MGI:2442640 | Cpeb2         |
| ENSMUST00000169256.4  | 0 | MGI:2669829 | D630045J12Rik |
| ENSMUST00000169423.8  | 0 | MGI:2140230 | Camta1        |
| ENSMUST00000169863.8  | 0 | MGI:2444268 | Fam169a       |
| ENSMUST00000173875.8  | 0 | MGI:1344414 | Sra1          |
| ENSMUST00000174050.7  | 0 | MGI:109547  | Dnm2          |
| ENSMUST00000174641.7  | 0 | MGI:2450166 | Arhgap32      |
| ENSMUST00000175903.8  | 0 | MGI:103264  | Arhgef2       |
| ENSMUST00000176233.1  | 0 | MGI:5313142 | Gm20695       |
| ENSMUST00000178174.2  | 0 | MGI:101895  | Pou3f2        |
| ENSMUST00000179234.1  | 0 | MGI:2447811 | Aldoart1      |
| ENSMUST00000179393.7  | 0 | MGI:2179326 | Oxr1          |
| ENSMUST00000180037.7  | 0 | MGI:1276108 | Birc6         |
| ENSMUST00000182884.7  | 0 | MGI:88026   | Ank3          |
| ENSMUST00000183156.7  | 0 | MGI:1924781 | Anks1b        |
| ENSMUST00000183850.7  | 0 | MGI:2153182 | Kcnn2         |
| ENSMUST00000183984.7  | 0 | MGI:1338822 | Celf2         |

|                       |   |             |          |
|-----------------------|---|-------------|----------|
| ENSMUST00000184183.1  | 0 | MGI:4937914 | Gm17087  |
| ENSMUST00000186207.6  | 0 | MGI:3039600 | Fbxl19   |
| ENSMUST00000186375.7  | 0 | MGI:1922013 | Naa60    |
| ENSMUST00000186548.6  | 0 | MGI:2446229 | Tet3     |
| ENSMUST00000189137.6  | 0 | MGI:109528  | Trpc1    |
| ENSMUST00000190285.1  | 0 | MGI:103013  | Cacna1c  |
| ENSMUST00000191138.6  | 0 | MGI:1338076 | Hivep2   |
| ENSMUST00000191677.5  | 0 | MGI:109252  | Sema4c   |
| ENSMUST00000191758.5  | 0 | MGI:2443399 | Tmem131l |
| ENSMUST00000192093.5  | 0 | MGI:1916672 | Pex5l    |
| ENSMUST00000194563.5  | 0 | MGI:1927110 | Tmem131  |
| ENSMUST00000195708.1  | 0 | MGI:2659071 | Rapgef2  |
| ENSMUST00000195823.1  | 0 | MGI:1935218 | Pcdhga6  |
| ENSMUST00000198499.4  | 0 | MGI:1923811 | Snx7     |
| ENSMUST00000203482.1  | 0 | MGI:1917977 | Rasgef1a |
| ENSMUST00000208538.1  | 0 | MGI:2673998 | Arhgap33 |
| ENSMUST00000212889.1  | 0 | MGI:1347098 | Slc27a1  |
| ENSMUST00000213990.1  | 0 | MGI:101848  | Gnb5     |
| ENSMUST00000217647.1  | 0 | MGI:1925976 | Scaper   |
| ENSMUST00000218823.1  | 0 | MGI:95815   | Grik2    |
| ENSMUST00000219443.1  | 0 | MGI:1332637 | Arhgap5  |
| ENSMUST00000220302.1  | 0 | MGI:104296  | Nova2    |
| ENSMUST00000220816.1  | 0 | MGI:1261845 | Esyt2    |
| ENSMUST00000221240.1  | 0 | MGI:1919508 | Kcnk10   |
| ENSMUST00000224905.1  | 0 | MGI:1921086 | Slc35b2  |
| ENSMUST00000226414.1  | 0 | MGI:1918040 | Ubr5     |
| ENSMUST00000227496.1  | 0 | MGI:109503  | Cdh12    |
| ENSMUST00000229741.1  | 0 | MGI:1926224 | Rbfox1   |
| ENSMUST00000232239.1  | 0 | MGI:1890564 | Rcan1    |
| ENSMUST00000233173.1  | 0 | MGI:1346065 | Dlgap1   |
| ENSMUST00000233197.1  | 0 | MGI:1914239 | Kctd20   |
| ENSMUST00000234081.1  | 0 | MGI:105094  | Adcyap1  |
| ENSMUST00000236045.1  | 0 | MGI:1914049 | Ube2w    |
| ENSMUST00000238331.1  | 0 | MGI:1350923 | Sh3d19   |
| ENSMUST00000238821.1  | 0 | MGI:1196356 | lqsec1   |
| ENSMUST00000238951.1  | 0 | MGI:2449923 | Egfl7    |
| ENSMUST00000239069.1  | 0 | MGI:109155  | Kcnab1   |
| ENSMUST00000000153.8  | 0 | MGI:95767   | Gna12    |
| ENSMUST00000000304.13 | 0 | MGI:1916942 | Hddc2    |

|                       |   |             |               |
|-----------------------|---|-------------|---------------|
| ENSMUST00000001347.6  | 0 | MGI:1338755 | Rnd2          |
| ENSMUST00000001920.12 | 0 | MGI:1919598 | Aif1l         |
| ENSMUST00000002100.7  | 0 | MGI:1918937 | Tmem25        |
| ENSMUST00000002127.13 | 0 | MGI:1328357 | Unc119        |
| ENSMUST00000002152.12 | 0 | MGI:2181667 | Bbc3          |
| ENSMUST00000002397.6  | 0 | MGI:1917903 | Gmpr2         |
| ENSMUST00000002532.8  | 0 | MGI:1915153 | Rgs19         |
| ENSMUST00000002625.14 | 0 | MGI:98904   | Uck1          |
| ENSMUST00000003152.13 | 0 | MGI:1341870 | Stk11         |
| ENSMUST00000004326.3  | 0 | MGI:107683  | Plxna3        |
| ENSMUST00000004381.13 | 0 | MGI:1315211 | Lpcat3        |
| ENSMUST00000004681.13 | 0 | MGI:1354723 | Pnpla6        |
| ENSMUST00000004684.12 | 0 | MGI:2142567 | Arhgef18      |
| ENSMUST00000004684.12 | 0 | MGI:2142567 | Arhgef18      |
| ENSMUST00000004684.12 | 0 | MGI:2142567 | Arhgef18      |
| ENSMUST00000004684.12 | 0 | MGI:2142567 | Arhgef18      |
| ENSMUST00000004729.4  | 0 | MGI:106098  | Etfb          |
| ENSMUST00000004968.10 | 0 | MGI:1347008 | Plod3         |
| ENSMUST00000005815.6  | 0 | MGI:96677   | Kit           |
| ENSMUST00000006217.9  | 0 | MGI:1343161 | Snf8          |
| ENSMUST00000006611.8  | 0 | MGI:102690  | Srm           |
| ENSMUST00000006632.7  | 0 | MGI:1917855 | Zdhhc24       |
| ENSMUST00000007255.12 | 0 | MGI:1859016 | Ddah2         |
| ENSMUST00000008004.9  | 0 | MGI:2136689 | Ddx49         |
| ENSMUST00000010795.4  | 0 | MGI:3605455 | Acaa1b        |
| ENSMUST00000012028.13 | 0 | MGI:1929253 | Gltp          |
| ENSMUST00000013667.2  | 0 | MGI:1924210 | Bcas1         |
| ENSMUST00000013773.11 | 0 | MGI:1916969 | Cad           |
| ENSMUST00000014981.7  | 0 | MGI:1921606 | 4931428F04Rik |
| ENSMUST00000015017.7  | 0 | MGI:98444   | Surf2         |
| ENSMUST00000015456.9  | 0 | MGI:107776  | Gadd45b       |
| ENSMUST00000015894.11 | 0 | MGI:2385110 | Aph1a         |
| ENSMUST00000016072.11 | 0 | MGI:1932395 | Rrbp1         |
| ENSMUST00000016088.8  | 0 | MGI:1933384 | Castor2       |
| ENSMUST00000016631.13 | 0 | MGI:1914783 | Ppfibp1       |
| ENSMUST00000017622.11 | 0 | MGI:1923264 | Zc3h18        |
| ENSMUST00000018337.8  | 0 | MGI:2384876 | Cdc73         |
| ENSMUST00000018993.6  | 0 | MGI:2388637 | Wwc1          |
| ENSMUST00000019962.14 | 0 | MGI:1859568 | Cd164         |

|                       |   |             |               |
|-----------------------|---|-------------|---------------|
| ENSMUST00000020004.7  | 0 | MGI:1913653 | Asf1a         |
| ENSMUST00000020171.11 | 0 | MGI:95537   | Ccn2          |
| ENSMUST00000020248.15 | 0 | MGI:1914532 | Washc3        |
| ENSMUST00000020403.6  | 0 | MGI:1202907 | Csrp2         |
| ENSMUST00000020461.14 | 0 | MGI:109591  | Nfic          |
| ENSMUST00000020546.2  | 0 | MGI:1316731 | Stc2          |
| ENSMUST00000020719.6  | 0 | MGI:1915112 | 2310033P09Rik |
| ENSMUST00000020957.12 | 0 | MGI:2144929 | Adi1          |
| ENSMUST00000020971.13 | 0 | MGI:1344401 | Rnf144a       |
| ENSMUST00000021077.3  | 0 | MGI:1349482 | Slc9a3r1      |
| ENSMUST00000021135.4  | 0 | MGI:1914124 | Ncbp3         |
| ENSMUST00000021620.12 | 0 | MGI:1915399 | Otub2         |
| ENSMUST00000021669.14 | 0 | MGI:1920986 | Fcf1          |
| ENSMUST00000021920.7  | 0 | MGI:1099431 | Sptlc1        |
| ENSMUST00000021937.11 | 0 | MGI:1349417 | Zfp346        |
| ENSMUST00000021942.7  | 0 | MGI:1913744 | Preli1        |
| ENSMUST00000022499.12 | 0 | MGI:1914403 | Rnaseh2b      |
| ENSMUST00000022665.3  | 0 | MGI:2180557 | Rhobtb2       |
| ENSMUST00000022693.8  | 0 | MGI:88176   | Bmp1          |
| ENSMUST00000022865.16 | 0 | MGI:1914404 | Mtdh          |
| ENSMUST00000023007.6  | 0 | MGI:1341110 | Adcy8         |
| ENSMUST00000023213.7  | 0 | MGI:1930628 | Hgh1          |
| ENSMUST00000024260.13 | 0 | MGI:1890471 | Pcbp4         |
| ENSMUST00000024572.9  | 0 | MGI:3630308 | Rsph3b        |
| ENSMUST00000024839.5  | 0 | MGI:104754  | Sik1          |
| ENSMUST00000024954.10 | 0 | MGI:109169  | Epas1         |
| ENSMUST00000024983.11 | 0 | MGI:2146906 | Ift140        |
| ENSMUST00000025003.9  | 0 | MGI:98370   | Sox8          |
| ENSMUST00000025081.12 | 0 | MGI:1344313 | Zeb1          |
| ENSMUST00000025363.6  | 0 | MGI:96070   | Hbegf         |
| ENSMUST00000025420.13 | 0 | MGI:97806   | Ptpn2         |
| ENSMUST00000025835.5  | 0 | MGI:1098296 | Cpt1a         |
| ENSMUST00000025924.3  | 0 | MGI:2147611 | Spindoc       |
| ENSMUST00000026256.8  | 0 | MGI:1915681 | Fbxl15        |
| ENSMUST00000026357.11 | 0 | MGI:1891497 | Jph3          |
| ENSMUST00000026448.9  | 0 | MGI:1919135 | Faap100       |
| ENSMUST00000026470.5  | 0 | MGI:1277989 | Shmt2         |
| ENSMUST00000026828.6  | 0 | MGI:1915491 | Mcrip2        |
| ENSMUST00000027279.11 | 0 | MGI:1923258 | Nabp1         |



|                       |   |             |         |
|-----------------------|---|-------------|---------|
| ENSMUST00000027303.13 | 0 | MGI:106572  | Imp4    |
| ENSMUST00000027396.14 | 0 | MGI:1921354 | Abcb6   |
| ENSMUST00000027743.12 | 0 | MGI:1926235 | Stx6    |
| ENSMUST00000028209.14 | 0 | MGI:1914093 | Dolpp1  |
| ENSMUST00000028288.4  | 0 | MGI:97363   | Notch1  |
| ENSMUST00000028522.9  | 0 | MGI:96605   | Itga6   |
| ENSMUST00000028600.13 | 0 | MGI:1314882 | Hipk3   |
| ENSMUST00000028728.5  | 0 | MGI:1277977 | Ubr1    |
| ENSMUST00000028995.4  | 0 | MGI:1914267 | Fam210b |
| ENSMUST00000029441.3  | 0 | MGI:1859546 | Syt10   |
| ENSMUST00000029673.9  | 0 | MGI:106644  | Efna3   |
| ENSMUST00000029850.14 | 0 | MGI:88527   | Cryz    |
| ENSMUST00000030025.9  | 0 | MGI:1352457 | Nr4a3   |
| ENSMUST00000030090.3  | 0 | MGI:96853   | Alad    |
| ENSMUST00000030202.13 | 0 | MGI:1917770 | Glipr2  |
| ENSMUST00000030556.7  | 0 | MGI:104673  | Ptpn12  |
| ENSMUST00000030669.7  | 0 | MGI:102462  | Slc9a1  |
| ENSMUST00000030739.10 | 0 | MGI:95401   | Epb41   |
| ENSMUST00000030775.11 | 0 | MGI:3036258 | Chd5    |
| ENSMUST00000030901.8  | 0 | MGI:1919207 | Ints11  |
| ENSMUST00000030903.11 | 0 | MGI:1919214 | Atad3a  |
| ENSMUST00000031345.14 | 0 | MGI:1915348 | Rchy1   |
| ENSMUST00000031399.12 | 0 | MGI:97788   | Psph    |
| ENSMUST00000031490.10 | 0 | MGI:1270126 | Ulk1    |
| ENSMUST00000031588.11 | 0 | MGI:2140991 | Usp30   |
| ENSMUST00000032192.8  | 0 | MGI:96623   | Itpr1   |
| ENSMUST00000032462.8  | 0 | MGI:109125  | Timp4   |
| ENSMUST00000032566.2  | 0 | MGI:1914619 | Qpctl   |
| ENSMUST00000032710.6  | 0 | MGI:2156052 | Slc17a6 |
| ENSMUST00000033160.14 | 0 | MGI:1921355 | Gga2    |
| ENSMUST00000033173.14 | 0 | MGI:1349452 | Polr3e  |
| ENSMUST00000033380.6  | 0 | MGI:97516   | Cdk16   |
| ENSMUST00000033930.4  | 0 | MGI:2442191 | Dusp4   |
| ENSMUST00000033938.6  | 0 | MGI:97740   | Polb    |
| ENSMUST00000034000.14 | 0 | MGI:1277124 | Asah1   |
| ENSMUST00000034136.11 | 0 | MGI:1915391 | Gpt2    |
| ENSMUST00000034249.7  | 0 | MGI:107428  | Cfap20  |
| ENSMUST00000034522.7  | 0 | MGI:1918816 | Clmp    |
| ENSMUST00000034697.7  | 0 | MGI:1915932 | Slc44a2 |

|                       |   |             |          |
|-----------------------|---|-------------|----------|
| ENSMUST00000034749.15 | 0 | MGI:1924136 | Fam81a   |
| ENSMUST00000034889.9  | 0 | MGI:1298209 | Hcn4     |
| ENSMUST00000035007.9  | 0 | MGI:2447165 | Cmtm6    |
| ENSMUST00000035099.8  | 0 | MGI:1921748 | Gorasp1  |
| ENSMUST00000035201.12 | 0 | MGI:1338037 | Rbm6     |
| ENSMUST00000035346.13 | 0 | MGI:1918765 | Nol4l    |
| ENSMUST00000035484.10 | 0 | MGI:2448759 | Cdv3     |
| ENSMUST00000035604.12 | 0 | MGI:2449311 | Gemin5   |
| ENSMUST00000035776.9  | 0 | MGI:1923173 | Dnttip2  |
| ENSMUST00000035812.13 | 0 | MGI:1916987 | Ttl      |
| ENSMUST00000036649.7  | 0 | MGI:104842  | Coil     |
| ENSMUST00000036880.7  | 0 | MGI:2448549 | Cdk10    |
| ENSMUST00000037097.8  | 0 | MGI:1925847 | Fhod3    |
| ENSMUST00000037246.6  | 0 | MGI:1333783 | Ccs      |
| ENSMUST00000037418.6  | 0 | MGI:1923480 | Tmed8    |
| ENSMUST00000037534.7  | 0 | MGI:1917760 | Rnf167   |
| ENSMUST00000037708.9  | 0 | MGI:2652846 | Asic4    |
| ENSMUST00000038332.8  | 0 | MGI:2385277 | Ctu1     |
| ENSMUST00000038600.3  | 0 | MGI:2153089 | Mrps2    |
| ENSMUST00000038709.13 | 0 | MGI:2384959 | Cybc1    |
| ENSMUST00000038753.5  | 0 | MGI:2442062 | Sh3pxd2b |
| ENSMUST00000039071.2  | 0 | MGI:2157946 | Cacng5   |
| ENSMUST00000039331.8  | 0 | MGI:2681842 | Igsf21   |
| ENSMUST00000039388.2  | 0 | MGI:1933155 | Arl4d    |
| ENSMUST00000039818.9  | 0 | MGI:2443883 | Aldh4a1  |
| ENSMUST00000039840.14 | 0 | MGI:2445171 | Enpp6    |
| ENSMUST00000040340.15 | 0 | MGI:3505790 | Fcho2    |
| ENSMUST00000040616.8  | 0 | MGI:2442265 | Kctd7    |
| ENSMUST00000040647.10 | 0 | MGI:95515   | Fgf1     |
| ENSMUST00000040676.10 | 0 | MGI:2444209 | Ankrd54  |
| ENSMUST00000040776.5  | 0 | MGI:2443939 | Cenpt    |
| ENSMUST00000040967.8  | 0 | MGI:1916724 | Vps37b   |
| ENSMUST00000041053.10 | 0 | MGI:1098623 | Acaa2    |
| ENSMUST00000041407.6  | 0 | MGI:1913292 | Sostdc1  |
| ENSMUST00000041627.13 | 0 | MGI:2443847 | Sdk2     |
| ENSMUST00000041776.11 | 0 | MGI:108408  | Rgs8     |
| ENSMUST00000042412.4  | 0 | MGI:1341800 | Hey1     |
| ENSMUST00000042603.13 | 0 | MGI:96570   | Inhba    |
| ENSMUST00000043214.7  | 0 | MGI:97846   | Rac2     |

|                       |   |             |               |
|-----------------------|---|-------------|---------------|
| ENSMUST00000043338.9  | 0 | MGI:1917362 | Sft2d2        |
| ENSMUST00000043493.6  | 0 | MGI:2385865 | Ice1          |
| ENSMUST00000043521.4  | 0 | MGI:2447876 | Sec22a        |
| ENSMUST00000043975.10 | 0 | MGI:1922910 | Lin37         |
| ENSMUST00000044081.8  | 0 | MGI:2682295 | Tent4a        |
| ENSMUST00000044484.12 | 0 | MGI:1095419 | Kdm6a         |
| ENSMUST00000044734.2  | 0 | MGI:2674366 | Rims4         |
| ENSMUST00000044844.8  | 0 | MGI:3604804 | Mfsd12        |
| ENSMUST00000045110.13 | 0 | MGI:1925064 | Dstyk         |
| ENSMUST00000045454.8  | 0 | MGI:1916334 | Fam207a       |
| ENSMUST00000045487.3  | 0 | MGI:1916831 | Rhou          |
| ENSMUST00000045521.8  | 0 | MGI:2672905 | Dtx4          |
| ENSMUST00000045693.7  | 0 | MGI:108048  | Smyd5         |
| ENSMUST00000045970.7  | 0 | MGI:1194891 | Gpc1          |
| ENSMUST00000046073.15 | 0 | MGI:1354737 | Kdm2b         |
| ENSMUST00000046157.9  | 0 | MGI:1919257 | Fndc3b        |
| ENSMUST00000046174.7  | 0 | MGI:106925  | Cldn11        |
| ENSMUST00000046223.13 | 0 | MGI:2386846 | Abca8a        |
| ENSMUST00000046633.9  | 0 | MGI:2146232 | AW549877      |
| ENSMUST00000046941.7  | 0 | MGI:1916117 | Rnf122        |
| ENSMUST00000047034.8  | 0 | MGI:2147036 | Ttbk1         |
| ENSMUST00000047085.15 | 0 | MGI:2449973 | Tbc1d17       |
| ENSMUST00000047203.8  | 0 | MGI:1917544 | Rnf126        |
| ENSMUST00000047815.12 | 0 | MGI:1924281 | Slc9a8        |
| ENSMUST00000047923.11 | 0 | MGI:1916858 | Sec24d        |
| ENSMUST00000048982.10 | 0 | MGI:1916034 | Prickle1      |
| ENSMUST00000049138.7  | 0 | MGI:1924042 | 2410131K14Rik |
| ENSMUST00000049156.6  | 0 | MGI:1921597 | Meak7         |
| ENSMUST00000050625.14 | 0 | MGI:107555  | Sema5b        |
| ENSMUST00000051053.4  | 0 | MGI:2444752 | Ubtd2         |
| ENSMUST00000052168.5  | 0 | MGI:1918448 | Otud1         |
| ENSMUST00000052183.6  | 0 | MGI:2156003 | Snip1         |
| ENSMUST00000052315.12 | 0 | MGI:3846135 | Gm44502       |
| ENSMUST00000052346.9  | 0 | MGI:102682  | Lgl1          |
| ENSMUST00000052691.8  | 0 | MGI:1915162 | 1600012H06Rik |
| ENSMUST00000052712.5  | 0 | MGI:2151797 | Tgs1          |
| ENSMUST00000053445.15 | 0 | MGI:1923734 | Kndc1         |
| ENSMUST00000054230.11 | 0 | MGI:1859609 | Sfmbt1        |
| ENSMUST00000054343.14 | 0 | MGI:1914855 | Akt1s1        |

|                       |   |             |               |
|-----------------------|---|-------------|---------------|
| ENSMUST00000054697.6  | 0 | MGI:1925179 | Yipf6         |
| ENSMUST00000055241.12 | 0 | MGI:1270153 | Zfp106        |
| ENSMUST00000057324.3  | 0 | MGI:3603594 | Flrt2         |
| ENSMUST00000057631.11 | 0 | MGI:2144695 | Sgsm2         |
| ENSMUST00000057944.11 | 0 | MGI:109522  | Ugt8a         |
| ENSMUST00000058137.8  | 0 | MGI:2442633 | Rabl6         |
| ENSMUST00000058444.9  | 0 | MGI:2687042 | Ppp1r37       |
| ENSMUST00000059057.13 | 0 | MGI:1924483 | Fam118b       |
| ENSMUST00000060061.10 | 0 | MGI:1916161 | Pygo2         |
| ENSMUST00000060173.8  | 0 | MGI:2443872 | Samd10        |
| ENSMUST00000060834.11 | 0 | MGI:2142037 | Alkbh6        |
| ENSMUST00000061169.6  | 0 | MGI:3617843 | Gal3st3       |
| ENSMUST00000061545.6  | 0 | MGI:2387350 | C1ql3         |
| ENSMUST00000061833.5  | 0 | MGI:2685030 | Tlcd5         |
| ENSMUST00000061891.10 | 0 | MGI:1920997 | Shld1         |
| ENSMUST00000062831.15 | 0 | MGI:95413   | Erc2          |
| ENSMUST00000063117.9  | 0 | MGI:1341859 | Gstz1         |
| ENSMUST00000063470.10 | 0 | MGI:109559  | Ptpr          |
| ENSMUST00000064016.5  | 0 | MGI:3584514 | Gpr17         |
| ENSMUST00000064190.12 | 0 | MGI:103291  | Rai1          |
| ENSMUST00000064405.7  | 0 | MGI:99612   | Epha3         |
| ENSMUST00000064473.12 | 0 | MGI:2151118 | Adarb2        |
| ENSMUST00000064536.12 | 0 | MGI:1096335 | Adam17        |
| ENSMUST00000066060.10 | 0 | MGI:1929913 | Bcl11b        |
| ENSMUST00000066279.10 | 0 | MGI:2138297 | Sh3bp4        |
| ENSMUST00000066345.14 | 0 | MGI:1921624 | Clec16a       |
| ENSMUST00000067215.8  | 0 | MGI:1913501 | Arfgap3       |
| ENSMUST00000067458.6  | 0 | MGI:107556  | Sema5a        |
| ENSMUST00000070642.3  | 0 | MGI:88373   | Cebpb         |
| ENSMUST00000070801.10 | 0 | MGI:1914824 | Alg13         |
| ENSMUST00000070923.2  | 0 | MGI:1925301 | Them6         |
| ENSMUST00000071263.6  | 0 | MGI:1913364 | Dnajc30       |
| ENSMUST00000071792.6  | 0 | MGI:2152337 | 1110038F14Rik |
| ENSMUST00000071858.4  | 0 | MGI:1855689 | Hpcal1        |
| ENSMUST00000072093.12 | 0 | MGI:2154238 | Plxnb1        |
| ENSMUST00000072383.13 | 0 | MGI:1916017 | Washc1        |
| ENSMUST00000072910.5  | 0 | MGI:3036284 | Chadl         |
| ENSMUST00000073570.11 | 0 | MGI:1915641 | Zfp414        |
| ENSMUST00000073705.11 | 0 | MGI:2384939 | Fam222b       |

|                       |   |             |               |
|-----------------------|---|-------------|---------------|
| ENSMUST00000074002.11 | 0 | MGI:1891295 | Ube3b         |
| ENSMUST00000074552.11 | 0 | MGI:1289164 | Ncaph2        |
| ENSMUST00000074991.9  | 0 | MGI:2445179 | Tmem184b      |
| ENSMUST00000075610.12 | 0 | MGI:2685945 | Pstk          |
| ENSMUST00000075770.12 | 0 | MGI:2685177 | Megf10        |
| ENSMUST00000076813.7  | 0 | MGI:1914982 | lah1          |
| ENSMUST00000076957.6  | 0 | MGI:1338012 | Zdhhc8        |
| ENSMUST00000077078.11 | 0 | MGI:1922078 | Rnf185        |
| ENSMUST00000077220.13 | 0 | MGI:1306825 | Gtpbp6        |
| ENSMUST00000077548.11 | 0 | MGI:1933137 | Cttnbp2nl     |
| ENSMUST00000078357.4  | 0 | MGI:1098726 | Emp2          |
| ENSMUST00000078626.7  | 0 | MGI:1341834 | Trank1        |
| ENSMUST00000078880.5  | 0 | MGI:1913923 | Sorcs3        |
| ENSMUST00000079080.12 | 0 | MGI:1346347 | Mapk7         |
| ENSMUST00000079618.10 | 0 | MGI:109243  | St8sia5       |
| ENSMUST00000079724.8  | 0 | MGI:1346319 | Hax1          |
| ENSMUST00000080553.8  | 0 | MGI:1858496 | Deaf1         |
| ENSMUST00000081333.10 | 0 | MGI:1096879 | Fxn           |
| ENSMUST00000081688.12 | 0 | MGI:2152936 | Srgap1        |
| ENSMUST00000081872.12 | 0 | MGI:2443902 | Nell1         |
| ENSMUST00000082104.6  | 0 | MGI:2137383 | Csmd1         |
| ENSMUST00000084027.12 | 0 | MGI:95522   | Fgfr1         |
| ENSMUST00000084129.8  | 0 | MGI:1919140 | Mad2l2        |
| ENSMUST00000085840.10 | 0 | MGI:2155779 | Ttbk2         |
| ENSMUST00000086083.10 | 0 | MGI:1337080 | Ncor2         |
| ENSMUST00000086465.5  | 0 | MGI:99401   | Adora1        |
| ENSMUST00000086829.10 | 0 | MGI:1101760 | Bicd1         |
| ENSMUST00000086843.10 | 0 | MGI:1929735 | Asb1          |
| ENSMUST00000087908.9  | 0 | MGI:1923396 | Stx16         |
| ENSMUST00000089497.6  | 0 | MGI:1923310 | lsy1          |
| ENSMUST00000090103.10 | 0 | MGI:109620  | Arvcf         |
| ENSMUST00000092498.11 | 0 | MGI:1261415 | Sgpl1         |
| ENSMUST00000094053.6  | 0 | MGI:2385292 | Tnrc6a        |
| ENSMUST00000094077.4  | 0 | MGI:2448492 | Kdm6b         |
| ENSMUST00000096250.4  | 0 | MGI:1924294 | Arid2         |
| ENSMUST00000096299.8  | 0 | MGI:96281   | Htr2c         |
| ENSMUST00000097646.4  | 0 | MGI:1915296 | 2700062C07Rik |
| ENSMUST00000099482.4  | 0 | MGI:1347078 | Grk6          |
| ENSMUST00000099683.1  | 0 | MGI:3641657 | Gm10800       |

|                       |   |             |               |
|-----------------------|---|-------------|---------------|
| ENSMUST00000100789.10 | 0 | MGI:1915896 | Nadk2         |
| ENSMUST00000102578.10 | 0 | MGI:1915670 | Ankrd13a      |
| ENSMUST00000102581.10 | 0 | MGI:2141207 | Kctd10        |
| ENSMUST00000102585.1  | 0 | MGI:109167  | Fgf11         |
| ENSMUST00000102604.10 | 0 | MGI:87978   | Ak2           |
| ENSMUST00000102626.9  | 0 | MGI:97807   | Ptpn5         |
| ENSMUST00000102787.9  | 0 | MGI:2442794 | Dennd1a       |
| ENSMUST00000103232.1  | 0 | MGI:1924284 | 2510039O18Rik |
| ENSMUST00000105384.4  | 0 | MGI:1351911 | Ilvbl         |
| ENSMUST00000105397.9  | 0 | MGI:1915134 | Cfap410       |
| ENSMUST00000105987.8  | 0 | MGI:1321151 | Ptpru         |
| ENSMUST00000105993.3  | 0 | MGI:1914399 | Nkain1        |
| ENSMUST00000106236.8  | 0 | MGI:1095412 | Unc5c         |
| ENSMUST00000106354.8  | 0 | MGI:1858222 | Septin9       |
| ENSMUST00000106486.7  | 0 | MGI:894676  | Mast2         |
| ENSMUST00000107032.2  | 0 | MGI:2673002 | Arhgef17      |
| ENSMUST00000107165.7  | 0 | MGI:2447063 | Tenm4         |
| ENSMUST00000107259.3  | 0 | MGI:5504144 | Gm27029       |
| ENSMUST00000107737.10 | 0 | MGI:1861380 | Sphk2         |
| ENSMUST00000107818.8  | 0 | MGI:1918702 | Ankrd40       |
| ENSMUST00000107938.7  | 0 | MGI:3613677 | Shank1        |
| ENSMUST00000107974.2  | 0 | MGI:2686277 | Iglon5        |
| ENSMUST00000109309.8  | 0 | MGI:1930016 | Shank3        |
| ENSMUST00000109605.4  | 0 | MGI:88096   | Atf4          |
| ENSMUST00000109935.7  | 0 | MGI:3702158 | Syndig1       |
| ENSMUST00000110181.7  | 0 | MGI:2445356 | Smox          |
| ENSMUST00000110208.7  | 0 | MGI:1916846 | Ap5s1         |
| ENSMUST00000110276.7  | 0 | MGI:1924408 | Coq6          |
| ENSMUST00000111171.5  | 0 | MGI:2137624 | Pom121        |
| ENSMUST00000111263.8  | 0 | MGI:2135272 | Vangl2        |
| ENSMUST00000111999.7  | 0 | MGI:1336167 | Prkab1        |
| ENSMUST00000112456.8  | 0 | MGI:1889583 | Sh3kbp1       |
| ENSMUST00000112529.7  | 0 | MGI:109490  | Sms           |
| ENSMUST00000112992.8  | 0 | MGI:1916851 | Dab2ip        |
| ENSMUST00000113334.7  | 0 | MGI:1920234 | Ciz1          |
| ENSMUST00000113495.8  | 0 | MGI:3039562 | Taf9b         |
| ENSMUST00000113585.8  | 0 | MGI:1346042 | Mgll          |
| ENSMUST00000113654.7  | 0 | MGI:2652847 | Lrrc8a        |
| ENSMUST00000113763.7  | 0 | MGI:1098824 | Odf2          |

|                       |   |             |         |
|-----------------------|---|-------------|---------|
| ENSMUST00000113975.2  | 0 | MGI:1858226 | Slc5a3  |
| ENSMUST00000114195.7  | 0 | MGI:1933820 | Jam2    |
| ENSMUST00000114777.9  | 0 | MGI:1096566 | Pias2   |
| ENSMUST00000114943.10 | 0 | MGI:94869   | Dcc     |
| ENSMUST00000115576.2  | 0 | MGI:1913893 | Lix1    |
| ENSMUST00000116359.2  | 0 | MGI:1916214 | Ctc1    |
| ENSMUST00000116429.8  | 0 | MGI:1309465 | Slc12a4 |
| ENSMUST00000117236.7  | 0 | MGI:90168   | Dcaf11  |
| ENSMUST00000117363.8  | 0 | MGI:107236  | Lsg1    |
| ENSMUST00000118360.7  | 0 | MGI:1928743 | Kcnd3   |
| ENSMUST00000119033.7  | 0 | MGI:1917820 | Tent4b  |
| ENSMUST00000119567.7  | 0 | MGI:1917682 | Rufy2   |
| ENSMUST00000122328.7  | 0 | MGI:1916925 | Pxdn    |
| ENSMUST00000123791.7  | 0 | MGI:1925230 | Sbf1    |
| ENSMUST00000132151.7  | 0 | MGI:2442443 | Fsd1l   |
| ENSMUST00000132676.7  | 0 | MGI:1921701 | Pgs1    |
| ENSMUST00000133925.7  | 0 | MGI:1195972 | Terf2   |
| ENSMUST00000136026.7  | 0 | MGI:1919096 | Syce2   |
| ENSMUST00000138880.8  | 0 | MGI:2146285 | Nol12   |
| ENSMUST00000139454.2  | 0 | MGI:5547771 | Gm28035 |
| ENSMUST00000142742.8  | 0 | MGI:97360   | Nos1    |
| ENSMUST00000143829.4  | 0 | MGI:1923241 | Slain2  |
| ENSMUST00000147639.7  | 0 | MGI:2652840 | Vgll4   |
| ENSMUST00000147835.3  | 0 | MGI:104605  | Rasl2-9 |
| ENSMUST00000150627.8  | 0 | MGI:1914240 | Tmem134 |
| ENSMUST00000153128.1  | 0 | MGI:2151060 | Cnm4    |
| ENSMUST00000153360.7  | 0 | MGI:2443014 | Ino80c  |
| ENSMUST00000153424.7  | 0 | MGI:107432  | Drp2    |
| ENSMUST00000155998.1  | 0 | MGI:1337008 | Ankfy1  |
| ENSMUST00000156440.7  | 0 | MGI:1330262 | Zpr1    |
| ENSMUST00000159109.1  | 0 | MGI:2674092 | Zfp609  |
| ENSMUST00000160616.7  | 0 | MGI:1919410 | Tmem163 |
| ENSMUST00000160853.7  | 0 | MGI:1916127 | Maf1    |
| ENSMUST00000161639.7  | 0 | MGI:2444783 | Gfm2    |
| ENSMUST00000161779.7  | 0 | MGI:1314872 | Hipk2   |
| ENSMUST00000164848.2  | 0 | MGI:2685758 | Siah3   |
| ENSMUST00000165666.8  | 0 | MGI:2442934 | Minar2  |
| ENSMUST00000165952.8  | 0 | MGI:1333883 | Lats1   |
| ENSMUST00000167042.7  | 0 | MGI:6121629 | Gm49396 |

|                      |   |             |         |
|----------------------|---|-------------|---------|
| ENSMUST00000167588.8 | 0 | MGI:3045323 | Trim67  |
| ENSMUST00000168338.1 | 0 | MGI:2443487 | Trmt61a |
| ENSMUST00000168515.7 | 0 | MGI:1915757 | Ppfia4  |
| ENSMUST00000169212.8 | 0 | MGI:95524   | Fgfr3   |
| ENSMUST00000170141.2 | 0 | MGI:1929285 | Orc6    |
| ENSMUST00000171143.1 | 0 | MGI:3036259 | Fam102b |
| ENSMUST00000171300.7 | 0 | MGI:1915152 | Sumf2   |
| ENSMUST00000171696.7 | 0 | MGI:1923330 | Ttpal   |
| ENSMUST00000172314.8 | 0 | MGI:894659  | Hbp1    |
| ENSMUST00000172856.7 | 0 | MGI:2177308 | Znrf1   |
| ENSMUST00000177374.7 | 0 | MGI:1342335 | Asap1   |
| ENSMUST00000178473.7 | 0 | MGI:1914763 | Faap20  |
| ENSMUST00000179721.7 | 0 | MGI:2444928 | Phlpp2  |
| ENSMUST00000179802.1 | 0 | MGI:2142888 | Cmtm4   |
| ENSMUST00000180359.7 | 0 | MGI:1915938 | Abhd4   |
| ENSMUST00000189400.6 | 0 | MGI:1921479 | Paqr8   |
| ENSMUST00000189588.6 | 0 | MGI:1932411 | Tmem108 |
| ENSMUST00000191497.1 | 0 | MGI:1859645 | Usp27x  |
| ENSMUST00000197216.2 | 0 | MGI:5662654 | Gm42517 |
| ENSMUST00000207023.1 | 0 | MGI:98847   | Kdm3a   |
| ENSMUST00000212987.1 | 0 | MGI:2676970 | Sipa1l2 |
| ENSMUST00000213524.2 | 0 | MGI:1858236 | Celsr3  |
| ENSMUST00000214117.1 | 0 | MGI:107936  | Ii18    |
| ENSMUST00000214357.1 | 0 | MGI:2685354 | Igsf9b  |
| ENSMUST00000215396.1 | 0 | MGI:88537   | Csk     |
| ENSMUST00000215474.1 | 0 | MGI:104803  | Siae    |
| ENSMUST00000216172.1 | 0 | MGI:2444847 | Ncoa7   |
| ENSMUST00000218802.1 | 0 | MGI:6121566 | Gm49358 |
| ENSMUST00000222485.1 | 0 | MGI:1916867 | Pitrm1  |
| ENSMUST00000222544.1 | 0 | MGI:97904   | Trim27  |
| ENSMUST00000223982.1 | 0 | MGI:102694  | Ptprm   |
| ENSMUST00000225141.1 | 0 | MGI:1926233 | Fibp    |
| ENSMUST00000227275.1 | 0 | MGI:1913520 | Retreg1 |
| ENSMUST00000229744.1 | 0 | MGI:1858219 | Rcan2   |
| ENSMUST00000231700.1 | 0 | MGI:2685625 | Zdhhc23 |
| ENSMUST00000234473.1 | 0 | MGI:107387  | Aqp4    |
| ENSMUST00000236953.1 | 0 | MGI:1919451 | Otud6b  |
| ENSMUST00000238856.1 | 0 | MGI:1858308 | Tnk2    |
| ENSMUST00000239081.1 | 0 | MGI:2135937 | Sbk1    |



|                       |   |             |          |
|-----------------------|---|-------------|----------|
| ENSMUST00000239111.1  | 0 | MGI:2443012 | Tns3     |
| ENSMUST00000239113.1  | 0 | MGI:1347344 | Gla      |
| ENSMUST00000001672.11 | 0 | MGI:1316717 | lfrd1    |
| ENSMUST00000020408.15 | 0 | MGI:96952   | Mdm2     |
| ENSMUST00000020687.14 | 0 | MGI:1353578 | Pttg1    |
| ENSMUST00000023344.9  | 0 | MGI:1921352 | Slc35a5  |
| ENSMUST00000025997.6  | 0 | MGI:1923729 | Smndc1   |
| ENSMUST00000027499.12 | 0 | MGI:1858494 | Bok      |
| ENSMUST00000027802.8  | 0 | MGI:1277956 | Pycr2    |
| ENSMUST00000030080.6  | 0 | MGI:2443882 | Snx30    |
| ENSMUST00000030201.13 | 0 | MGI:1354951 | Gne      |
| ENSMUST00000032768.14 | 0 | MGI:1352452 | Nr2f2    |
| ENSMUST00000033509.14 | 0 | MGI:107822  | Ebp      |
| ENSMUST00000034413.7  | 0 | MGI:1916387 | Vstm5    |
| ENSMUST00000034801.10 | 0 | MGI:88137   | Bckdhb   |
| ENSMUST00000036156.5  | 0 | MGI:2385205 | lpo13    |
| ENSMUST00000036665.9  | 0 | MGI:1914792 | Cog6     |
| ENSMUST00000041042.12 | 0 | MGI:2144164 | Tbc1d10a |
| ENSMUST00000043767.8  | 0 | MGI:1914281 | Upf3a    |
| ENSMUST00000045078.12 | 0 | MGI:1923488 | Grhpr    |
| ENSMUST00000050668.3  | 0 | MGI:2445100 | Zfp770   |
| ENSMUST00000052932.9  | 0 | MGI:2443226 | Pde12    |
| ENSMUST00000056085.5  | 0 | MGI:1919082 | Csl      |
| ENSMUST00000065539.5  | 0 | MGI:1344365 | Dand5    |
| ENSMUST00000073456.8  | 0 | MGI:1913883 | Nsa2     |
| ENSMUST00000075994.10 | 0 | MGI:1933157 | Pdzrn3   |
| ENSMUST00000081574.7  | 0 | MGI:104966  | Syt17    |
| ENSMUST00000084497.11 | 0 | MGI:1926116 | Abraxas2 |
| ENSMUST00000089052.10 | 0 | MGI:1922462 | Rnf121   |
| ENSMUST00000091628.10 | 0 | MGI:104783  | Atxn1    |
| ENSMUST00000106609.7  | 0 | MGI:2385186 | Clcc1    |
| ENSMUST00000112610.1  | 0 | MGI:96904   | M6pr     |
| ENSMUST00000113242.4  | 0 | MGI:1351631 | Sh2d3c   |
| ENSMUST00000113896.7  | 0 | MGI:1915566 | Apoo     |
| ENSMUST00000119570.7  | 0 | MGI:1890149 | Tpm3     |
| ENSMUST00000128302.7  | 0 | MGI:1916976 | Smyd3    |
| ENSMUST00000145112.8  | 0 | MGI:96270   | Trmt2a   |
| ENSMUST00000153031.1  | 0 | MGI:2444637 | Sh3rf3   |
| ENSMUST00000159292.7  | 0 | MGI:1913496 | Osgep    |

|                       |   |             |           |
|-----------------------|---|-------------|-----------|
| ENSMUST00000167316.7  | 0 | MGI:1919861 | Zfp655    |
| ENSMUST00000170705.7  | 0 | MGI:1915403 | Gtf2e2    |
| ENSMUST00000176978.7  | 0 | MGI:1933131 | Kcnip4    |
| ENSMUST00000177594.7  | 0 | MGI:2445165 | Elmod2    |
| ENSMUST00000181904.2  | 0 | MGI:2442112 | Cxxc4     |
| ENSMUST00000209467.1  | 0 | MGI:5804828 | Gm45713   |
| ENSMUST00000216692.1  | 0 | MGI:6121526 | Gm49337   |
| ENSMUST00000218362.1  | 0 | MGI:1916730 | Ttc9      |
| ENSMUST00000223428.1  | 0 | MGI:3649931 | Rps18-ps5 |
| ENSMUST00000225200.1  | 0 | MGI:1306780 | Egr3      |
| ENSMUST00000000388.14 | 0 | MGI:2384924 | Ccm2      |
| ENSMUST00000001081.9  | 0 | MGI:1913339 | Rmnd5b    |
| ENSMUST00000001520.12 | 0 | MGI:1928277 | Afg3l1    |
| ENSMUST00000002350.10 | 0 | MGI:1914813 | Ciao3     |
| ENSMUST00000002699.6  | 0 | MGI:1928488 | Akap8     |
| ENSMUST00000003238.13 | 0 | MGI:1926805 | Foxj2     |
| ENSMUST00000003438.10 | 0 | MGI:3050117 | Mob3a     |
| ENSMUST00000003645.8  | 0 | MGI:95412   | Erccl     |
| ENSMUST00000003907.13 | 0 | MGI:104541  | Gcdh      |
| ENSMUST00000004327.10 | 0 | MGI:105979  | G6pdx     |
| ENSMUST00000009707.13 | 0 | MGI:1353596 | Tor2a     |
| ENSMUST00000010189.2  | 0 | MGI:1930765 | Tmem115   |
| ENSMUST00000015858.11 | 0 | MGI:1924143 | Cers2     |
| ENSMUST00000017153.3  | 0 | MGI:1349164 | Sdc4      |
| ENSMUST00000018353.13 | 0 | MGI:1929004 | Stk4      |
| ENSMUST00000018821.8  | 0 | MGI:1196386 | Slc25a39  |
| ENSMUST00000018841.2  | 0 | MGI:1929608 | Aatf      |
| ENSMUST00000019439.8  | 0 | MGI:1915616 | Tmem129   |
| ENSMUST00000020643.3  | 0 | MGI:2429762 | Rufy1     |
| ENSMUST00000020647.9  | 0 | MGI:1915317 | Mrnip     |
| ENSMUST00000021039.11 | 0 | MGI:109152  | Lig3      |
| ENSMUST00000021045.12 | 0 | MGI:1100867 | Asic2     |
| ENSMUST00000021168.13 | 0 | MGI:2448493 | Wscd1     |
| ENSMUST00000021681.3  | 0 | MGI:2442543 | Vash1     |
| ENSMUST00000021714.8  | 0 | MGI:1915770 | Zfyve21   |
| ENSMUST00000023087.12 | 0 | MGI:1100520 | Twf1      |
| ENSMUST00000023432.9  | 0 | MGI:1261838 | Nit2      |
| ENSMUST00000024981.8  | 0 | MGI:1196260 | Jpt2      |
| ENSMUST00000025823.5  | 0 | MGI:1336895 | Rce1      |

|                       |   |             |               |
|-----------------------|---|-------------|---------------|
| ENSMUST00000026737.11 | 0 | MGI:1915044 | Shisa5        |
| ENSMUST00000026917.9  | 0 | MGI:106206  | Nrp1          |
| ENSMUST00000027867.6  | 0 | MGI:1922145 | Ccdc181       |
| ENSMUST00000027940.5  | 0 | MGI:1914200 | Pacc1         |
| ENSMUST00000028257.2  | 0 | MGI:1918521 | Gca           |
| ENSMUST00000029459.9  | 0 | MGI:1338001 | Gdap2         |
| ENSMUST00000029686.3  | 0 | MGI:1298211 | Hcn3          |
| ENSMUST00000030206.9  | 0 | MGI:1916338 | Snopc3        |
| ENSMUST00000030760.14 | 0 | MGI:1913397 | Necap2        |
| ENSMUST00000030791.11 | 0 | MGI:1914243 | Smarcd3       |
| ENSMUST00000030895.11 | 0 | MGI:1891749 | Wrap73        |
| ENSMUST00000031037.13 | 0 | MGI:1345280 | Slc30a3       |
| ENSMUST00000031251.15 | 0 | MGI:2149821 | Hsd17b11      |
| ENSMUST00000031914.5  | 0 | MGI:2146066 | Ccdc184       |
| ENSMUST00000032559.16 | 0 | MGI:107612  | Rtn2          |
| ENSMUST00000032815.10 | 0 | MGI:104752  | Nfkbib        |
| ENSMUST00000032841.6  | 0 | MGI:1914558 | Mrpl46        |
| ENSMUST00000032844.6  | 0 | MGI:1913521 | Tmem126a      |
| ENSMUST00000032879.14 | 0 | MGI:1923235 | Rab30         |
| ENSMUST00000032936.7  | 0 | MGI:1891763 | Ppp4c         |
| ENSMUST00000033030.13 | 0 | MGI:1931144 | Parva         |
| ENSMUST00000033133.11 | 0 | MGI:1915115 | Rgs10         |
| ENSMUST00000033513.9  | 0 | MGI:1859648 | Ftsj1         |
| ENSMUST00000034277.13 | 0 | MGI:1343095 | Emc8          |
| ENSMUST00000034385.11 | 0 | MGI:109599  | Has3          |
| ENSMUST00000034465.8  | 0 | MGI:1913773 | 2810004N23Rik |
| ENSMUST00000034552.7  | 0 | MGI:103224  | Fdx1          |
| ENSMUST00000034949.9  | 0 | MGI:2660884 | Csnk1g1       |
| ENSMUST00000036111.9  | 0 | MGI:2385255 | Mrps35        |
| ENSMUST00000036631.13 | 0 | MGI:1914209 | Dusp26        |
| ENSMUST00000036744.7  | 0 | MGI:1913954 | Rbm4b         |
| ENSMUST00000036796.7  | 0 | MGI:2443199 | Fstl4         |
| ENSMUST00000038096.7  | 0 | MGI:2679256 | Fn3krp        |
| ENSMUST00000038149.12 | 0 | MGI:1341793 | Pbx2          |
| ENSMUST00000039286.4  | 0 | MGI:1277186 | Atg5          |
| ENSMUST00000039763.13 | 0 | MGI:2384905 | Ginm1         |
| ENSMUST00000040307.5  | 0 | MGI:2446144 | Marchf9       |
| ENSMUST00000040961.2  | 0 | MGI:2136401 | Pabpc5        |
| ENSMUST00000041010.14 | 0 | MGI:1921443 | Ccdc9         |

|                       |   |             |               |
|-----------------------|---|-------------|---------------|
| ENSMUST00000041190.16 | 0 | MGI:1858420 | Mcrs1         |
| ENSMUST00000042390.4  | 0 | MGI:2684954 | Man1b1        |
| ENSMUST00000042732.5  | 0 | MGI:2447775 | Fbxo45        |
| ENSMUST00000042818.10 | 0 | MGI:1355297 | Pim3          |
| ENSMUST00000042889.11 | 0 | MGI:1920145 | Setd5         |
| ENSMUST00000044252.6  | 0 | MGI:1347072 | Nubp2         |
| ENSMUST00000044332.15 | 0 | MGI:2386052 | Cerk          |
| ENSMUST00000046425.15 | 0 | MGI:105968  | Txlna         |
| ENSMUST00000046663.7  | 0 | MGI:1920629 | Dcbld2        |
| ENSMUST00000047721.9  | 0 | MGI:2384313 | Rrp9          |
| ENSMUST00000048044.11 | 0 | MGI:2442186 | Trub2         |
| ENSMUST00000048263.13 | 0 | MGI:2675859 | Wapl          |
| ENSMUST00000048305.9  | 0 | MGI:1915984 | Ppp4r3a       |
| ENSMUST00000048731.5  | 0 | MGI:1917670 | Arpin         |
| ENSMUST00000048790.6  | 0 | MGI:2685214 | Prrg3         |
| ENSMUST00000048923.6  | 0 | MGI:2142186 | Spred3        |
| ENSMUST00000049022.14 | 0 | MGI:1196617 | Ninj1         |
| ENSMUST00000050735.11 | 0 | MGI:1347071 | Zfp260        |
| ENSMUST00000051129.9  | 0 | MGI:2143657 | Lrrc75b       |
| ENSMUST00000051186.8  | 0 | MGI:2145955 | Prkaa1        |
| ENSMUST00000051888.3  | 0 | MGI:1919173 | Borcs6        |
| ENSMUST00000053744.8  | 0 | MGI:1919202 | Riox1         |
| ENSMUST00000053981.5  | 0 | MGI:1915868 | 1110012L19Rik |
| ENSMUST00000054387.7  | 0 | MGI:1330805 | Rab33b        |
| ENSMUST00000055168.4  | 0 | MGI:96654   | Kcna1         |
| ENSMUST00000055688.9  | 0 | MGI:2446217 | Phf13         |
| ENSMUST00000056176.7  | 0 | MGI:102718  | Vav2          |
| ENSMUST00000056907.6  | 0 | MGI:2444720 | Smcr8         |
| ENSMUST00000057792.8  | 0 | MGI:106687  | Pon2          |
| ENSMUST00000058659.8  | 0 | MGI:98852   | Tst           |
| ENSMUST00000060433.9  | 0 | MGI:1861712 | Tssc4         |
| ENSMUST00000060798.5  | 0 | MGI:2147162 | Unc119b       |
| ENSMUST00000061390.8  | 0 | MGI:2447586 | Fkrp          |
| ENSMUST00000061995.9  | 0 | MGI:1913951 | Spryd4        |
| ENSMUST00000062694.15 | 0 | MGI:1346865 | Mapk14        |
| ENSMUST00000062755.9  | 0 | MGI:1915024 | Borcs5        |
| ENSMUST00000062855.14 | 0 | MGI:1917677 | Mier2         |
| ENSMUST00000063976.8  | 0 | MGI:2686271 | Opa3          |
| ENSMUST00000064595.14 | 0 | MGI:2685438 | Asap2         |

|                       |   |             |               |
|-----------------------|---|-------------|---------------|
| ENSMUST00000066052.11 | 0 | MGI:1920462 | 3110082i17Rik |
| ENSMUST00000066610.7  | 0 | MGI:1923497 | Inka2         |
| ENSMUST00000066632.13 | 0 | MGI:1196310 | Angel2        |
| ENSMUST00000066675.9  | 0 | MGI:1923616 | Mtif3         |
| ENSMUST00000066984.13 | 0 | MGI:1345669 | Gtf2h2        |
| ENSMUST00000068044.13 | 0 | MGI:2384851 | Slc39a14      |
| ENSMUST00000069476.4  | 0 | MGI:2675858 | Rtl6          |
| ENSMUST00000069772.15 | 0 | MGI:1917459 | Tmem143       |
| ENSMUST00000070070.7  | 0 | MGI:1927638 | Dnaja4        |
| ENSMUST00000070552.13 | 0 | MGI:1921559 | Osbp2         |
| ENSMUST00000071539.9  | 0 | MGI:1917056 | Slc39a11      |
| ENSMUST00000072866.11 | 0 | MGI:2149543 | Ubap1         |
| ENSMUST00000076169.3  | 0 | MGI:2686040 | Mtx3          |
| ENSMUST00000081790.14 | 0 | MGI:1926082 | Cacul1        |
| ENSMUST00000087215.6  | 0 | MGI:1928902 | Cnot9         |
| ENSMUST00000088217.11 | 0 | MGI:1336172 | Tbl1x         |
| ENSMUST00000089494.5  | 0 | MGI:2446510 | Ii17d         |
| ENSMUST00000089688.5  | 0 | MGI:101900  | Mmp14         |
| ENSMUST00000090473.6  | 0 | MGI:1927653 | Gpr88         |
| ENSMUST00000090522.4  | 0 | MGI:1918313 | Zfp597        |
| ENSMUST00000093298.11 | 0 | MGI:2150019 | Spred2        |
| ENSMUST00000099373.11 | 0 | MGI:2151054 | Cnm2          |
| ENSMUST00000099955.3  | 0 | MGI:106595  | Fam89b        |
| ENSMUST00000101165.8  | 0 | MGI:1919363 | Adck1         |
| ENSMUST00000102762.9  | 0 | MGI:1913736 | Acot11        |
| ENSMUST00000107724.8  | 0 | MGI:1343085 | Spop          |
| ENSMUST00000108277.2  | 0 | MGI:104961  | Tnfaip1       |
| ENSMUST00000108872.8  | 0 | MGI:2445299 | Slc36a1       |
| ENSMUST00000109214.7  | 0 | MGI:1933159 | Rnf114        |
| ENSMUST00000109352.7  | 0 | MGI:1913710 | Sys1          |
| ENSMUST00000110896.1  | 0 | MGI:97527   | Pdgfa         |
| ENSMUST00000111118.7  | 0 | MGI:2444263 | Tcp11i1       |
| ENSMUST00000111737.2  | 0 | MGI:97245   | Mxi1          |
| ENSMUST00000113262.1  | 0 | MGI:1921373 | Foxp4         |
| ENSMUST00000113682.8  | 0 | MGI:1929864 | Myg1          |
| ENSMUST00000114126.8  | 0 | MGI:1918366 | Stx18         |
| ENSMUST00000114988.7  | 0 | MGI:2146854 | Fam234a       |
| ENSMUST00000116605.7  | 0 | MGI:1860374 | Mad2l1        |
| ENSMUST00000121534.7  | 0 | MGI:1349388 | Cops7b        |

|                       |             |             |          |
|-----------------------|-------------|-------------|----------|
| ENSMUST00000130320.7  | 0           | MGI:1917004 | Fbxo7    |
| ENSMUST00000131384.2  | 0           | MGI:2141989 | Grwd1    |
| ENSMUST00000143916.7  | 0           | MGI:1923433 | Celf6    |
| ENSMUST00000147545.7  | 0           | MGI:1923801 | Ccdc6    |
| ENSMUST00000150639.1  | 0           | MGI:1891740 | Dact1    |
| ENSMUST00000152080.7  | 0           | MGI:2142403 | Slc35e1  |
| ENSMUST00000160300.1  | 0           | MGI:107492  | Nxph1    |
| ENSMUST00000160959.7  | 0           | MGI:1098806 | Commd2   |
| ENSMUST00000164163.7  | 0           | MGI:104295  | Sla      |
| ENSMUST00000164273.8  | 0           | MGI:1860055 | Panx1    |
| ENSMUST00000164589.8  | 0           | MGI:1921083 | Fam98c   |
| ENSMUST00000165630.2  | 0           | MGI:1338026 | Tom1     |
| ENSMUST00000166040.8  | 0           | MGI:1860075 | Ppt2     |
| ENSMUST00000167023.7  | 0           | MGI:1915980 | Dus1l    |
| ENSMUST00000168003.8  | 0           | MGI:2176159 | Cyp26b1  |
| ENSMUST00000170759.2  | 0           | MGI:1858435 | Gpatch11 |
| ENSMUST00000176565.7  | 0           | MGI:1914004 | Foxp1    |
| ENSMUST00000176652.7  | 0           | MGI:3042141 | Traf7    |
| ENSMUST00000177054.7  | 0           | MGI:1858178 | Usp2     |
| ENSMUST00000179556.1  | 0           | MGI:2442951 | Zfp574   |
| ENSMUST00000180252.2  | 0           | MGI:2685169 | Tmem151b |
| ENSMUST00000193286.5  | 0           | MGI:1925517 | Klhd8b   |
| ENSMUST00000210282.1  | 0           | MGI:2685003 | Zbtb45   |
| ENSMUST00000218766.1  | 0           | MGI:1921642 | Specc1l  |
| ENSMUST00000219109.1  | 0           | MGI:105933  | Rab3ip   |
| ENSMUST00000228977.1  | 0           | MGI:3818630 | Sco2     |
| ENSMUST00000235900.1  | 0           | MGI:1913275 | Rcl1     |
| ENSMUST00000019723.7  | 0.002032924 | MGI:2156020 | Mydgf    |
| ENSMUST00000021450.5  | 0.002032924 | MGI:2135760 | Sgpp1    |
| ENSMUST00000022909.9  | 0.002032924 | MGI:2684929 | Dcaf13   |
| ENSMUST00000028648.2  | 0.002032924 | MGI:1933945 | Syt13    |
| ENSMUST00000040184.3  | 0.002032924 | MGI:109524  | Trpc5    |
| ENSMUST00000076807.6  | 0.002032924 | MGI:1935201 | Pcdhgc3  |
| ENSMUST00000094993.2  | 0.004151506 | MGI:2180122 | Klhl9    |
| ENSMUST00000174510.7  | 0.004151506 | MGI:1343188 | Ube2g2   |
| ENSMUST00000014750.14 | 0.005770531 | MGI:1915113 | Slc25a11 |
| ENSMUST00000021667.6  | 0.005770531 | MGI:1921566 | Isca2    |
| ENSMUST00000028225.11 | 0.005770531 | MGI:1914248 | Psmd5    |
| ENSMUST00000033025.6  | 0.005770531 | MGI:1353593 | Lcmt1    |

|                       |             |             |         |
|-----------------------|-------------|-------------|---------|
| ENSMUST00000052120.13 | 0.005770531 | MGI:2443143 | Wdr3    |
| ENSMUST00000061419.8  | 0.005770531 | MGI:3641855 | Gm9833  |
| ENSMUST00000061568.8  | 0.005770531 | MGI:2442595 | Slc36a4 |
| ENSMUST00000100802.10 | 0.005770531 | MGI:1915814 | Nufip2  |
| ENSMUST00000102515.9  | 0.005770531 | MGI:97594   | Prkacb  |
| ENSMUST00000118193.7  | 0.005770531 | MGI:1914765 | Ttc33   |
| ENSMUST00000127756.7  | 0.005770531 | MGI:99675   | Adcy3   |
| ENSMUST00000185362.6  | 0.005770531 | MGI:1916617 | Glrx2   |
| ENSMUST00000029002.8  | 0.006924846 | MGI:98241   | Stmn2   |
| ENSMUST00000062678.10 | 0.007165319 | MGI:1203500 | Rrp1    |
| ENSMUST00000026433.8  | 0.007749398 | MGI:1915344 | Smarcc2 |
| ENSMUST00000020630.7  | 0.00876035  | MGI:1342292 | Hspa4   |
| ENSMUST00000196456.4  | 0.009353115 | MGI:1913129 | Rbm8a   |
| ENSMUST00000088169.6  | 0.009686012 | MGI:1339970 | Rtn3    |
| ENSMUST00000034432.6  | 0.00975695  | MGI:1344403 | Cfdp1   |
| ENSMUST00000029125.9  | 0.010263394 | MGI:1921502 | Armc1   |
| ENSMUST00000120539.7  | 0.013042531 | MGI:109360  | Lmo4    |
| ENSMUST00000103053.9  | 0.013726094 | MGI:1915372 | Nkain4  |
| ENSMUST00000237301.1  | 0.013726094 | MGI:1351615 | Add3    |
| ENSMUST00000108849.7  | 0.014157375 | MGI:1924068 | Mfap3   |
| ENSMUST00000026221.6  | 0.014725856 | MGI:98240   | Scd2    |
| ENSMUST00000053748.15 | 0.014836496 | MGI:103009  | Epb41l2 |
| ENSMUST00000113147.7  | 0.014861506 | MGI:1917418 | Gprasp1 |
| ENSMUST00000027478.6  | 0.015170848 | MGI:1914523 | Ndufa10 |
| ENSMUST00000030014.8  | 0.016063227 | MGI:1891840 | Ncbp1   |
| ENSMUST00000031426.13 | 0.016063227 | MGI:1098597 | Ift81   |
| ENSMUST00000039064.7  | 0.016063227 | MGI:3645930 | Fam124a |
| ENSMUST00000041830.9  | 0.016063227 | MGI:1913867 | Ntmt1   |
| ENSMUST00000043604.5  | 0.016063227 | MGI:95766   | Gna11   |
| ENSMUST00000045702.5  | 0.016063227 | MGI:2443286 | Slc2a6  |
| ENSMUST00000089473.4  | 0.016063227 | MGI:1923215 | Zdhhc20 |
| ENSMUST00000092688.11 | 0.016063227 | MGI:1915356 | Nt5c3b  |
| ENSMUST00000100527.12 | 0.016063227 | MGI:1915209 | Puf60   |
| ENSMUST00000149248.8  | 0.016063227 | MGI:2385906 | Spg7    |
| ENSMUST00000091403.5  | 0.016635553 | MGI:88075   | Arsb    |
| ENSMUST00000172298.7  | 0.018544348 | MGI:1858202 | Rab11a  |
| ENSMUST00000235547.1  | 0.018875873 | MGI:95742   | Glo1    |
| ENSMUST00000017851.3  | 0.018947353 | MGI:1349457 | Serinc3 |
| ENSMUST00000020365.14 | 0.018947353 | MGI:1915364 | Pwwp3a  |

|                       |             |             |               |
|-----------------------|-------------|-------------|---------------|
| ENSMUST00000025276.14 | 0.018947353 | MGI:1916528 | Rmc1          |
| ENSMUST00000025357.8  | 0.018947353 | MGI:1337062 | Ap3s1         |
| ENSMUST00000027952.11 | 0.018947353 | MGI:107684  | Plxna2        |
| ENSMUST00000028781.8  | 0.018947353 | MGI:1341628 | Atrn          |
| ENSMUST00000029194.11 | 0.018947353 | MGI:106203  | Skil          |
| ENSMUST00000029269.11 | 0.018947353 | MGI:1355319 | Exosc9        |
| ENSMUST00000030030.14 | 0.018947353 | MGI:1344413 | Tex10         |
| ENSMUST00000031250.13 | 0.018947353 | MGI:1921417 | Nudt9         |
| ENSMUST00000031351.10 | 0.018947353 | MGI:1929500 | Arl6ip4       |
| ENSMUST00000031606.9  | 0.018947353 | MGI:1330842 | Rasal1        |
| ENSMUST00000033431.13 | 0.018947353 | MGI:1330823 | Slc25a14      |
| ENSMUST00000037285.9  | 0.018947353 | MGI:1927140 | Git1          |
| ENSMUST00000041048.5  | 0.018947353 | MGI:2443195 | Orai2         |
| ENSMUST00000061156.9  | 0.018947353 | MGI:1918007 | Hacd2         |
| ENSMUST00000071361.12 | 0.018947353 | MGI:1916463 | Zfp428        |
| ENSMUST00000079754.10 | 0.018947353 | MGI:2443075 | Cpeb3         |
| ENSMUST00000088357.11 | 0.018947353 | MGI:104725  | Atn1          |
| ENSMUST00000090413.5  | 0.018947353 | MGI:1919230 | Utp3          |
| ENSMUST00000092123.10 | 0.018947353 | MGI:1278321 | Epc2          |
| ENSMUST00000093458.10 | 0.018947353 | MGI:2678085 | Sugp2         |
| ENSMUST00000102608.9  | 0.018947353 | MGI:2140475 | AU040320      |
| ENSMUST00000106058.7  | 0.018947353 | MGI:1858211 | Zranb2        |
| ENSMUST00000107609.3  | 0.018947353 | MGI:2445107 | Tmem245       |
| ENSMUST00000109288.8  | 0.018947353 | MGI:109188  | Kif21a        |
| ENSMUST00000109556.8  | 0.018947353 | MGI:2442978 | Ogfod1        |
| ENSMUST00000115151.4  | 0.018947353 | MGI:2146388 | Ubxn7         |
| ENSMUST00000119945.7  | 0.018947353 | MGI:1928139 | Mrps10        |
| ENSMUST00000141112.1  | 0.018947353 | MGI:2140466 | AU022252      |
| ENSMUST00000159348.2  | 0.018947353 | MGI:1919667 | 2700081O15Rik |
| ENSMUST00000159692.7  | 0.018947353 | MGI:106250  | Ermp1         |
| ENSMUST00000160144.8  | 0.018947353 | MGI:1915281 | Rnf146        |
| ENSMUST00000168461.7  | 0.018947353 | MGI:1922484 | Rnf19b        |
| ENSMUST00000180572.1  | 0.018947353 | MGI:87961   | Agrn          |
| ENSMUST00000001186.10 | 0.019892974 | MGI:1913868 | Snrnp27       |
| ENSMUST00000049941.11 | 0.019892974 | MGI:1918882 | Scn3b         |
| ENSMUST00000040167.10 | 0.020343982 | MGI:1913667 | Mat2b         |
| ENSMUST00000026723.8  | 0.020814402 | MGI:96217   | Hprt          |
| ENSMUST00000102611.9  | 0.022327362 | MGI:1930780 | Myh10         |
| ENSMUST00000034607.9  | 0.023275334 | MGI:2387591 | Arcn1         |



|                       |             |             |               |
|-----------------------|-------------|-------------|---------------|
| ENSMUST00000102507.9  | 0.023275334 | MGI:104652  | Capzb         |
| ENSMUST00000176540.7  | 0.023275334 | MGI:97495   | Pbx1          |
| ENSMUST00000210477.1  | 0.023275334 | MGI:1924880 | Prdm8         |
| ENSMUST00000037315.12 | 0.024747041 | MGI:1914344 | Abhd2         |
| ENSMUST00000195826.5  | 0.024747041 | MGI:1306801 | Pcdh9         |
| ENSMUST00000027438.7  | 0.024999482 | MGI:97286   | Ncl           |
| ENSMUST00000052798.13 | 0.025488466 | MGI:1929282 | Ptges3        |
| ENSMUST00000042834.3  | 0.027980312 | MGI:1913944 | Uqcrfs1       |
| ENSMUST00000110636.8  | 0.028347625 | MGI:1913755 | Zmynd11       |
| ENSMUST00000030284.9  | 0.028609908 | MGI:1352759 | Rnf11         |
| ENSMUST00000037127.14 | 0.028609908 | MGI:2153887 | Eri3          |
| ENSMUST00000089299.5  | 0.028609908 | MGI:3845555 | Npcd          |
| ENSMUST00000109349.8  | 0.028609908 | MGI:106562  | Dbnidd2       |
| ENSMUST00000146905.1  | 0.028609908 | MGI:99437   | Arl4a         |
| ENSMUST00000200157.4  | 0.028609908 | MGI:1914536 | Ift22         |
| ENSMUST00000003038.11 | 0.029265313 | MGI:101920  | Ap2a2         |
| ENSMUST00000020057.15 | 0.029265313 | MGI:2135609 | Lin7a         |
| ENSMUST00000020543.12 | 0.029265313 | MGI:1914829 | Cpeb4         |
| ENSMUST00000021913.15 | 0.029265313 | MGI:1338011 | Auh           |
| ENSMUST00000026826.13 | 0.029265313 | MGI:2183454 | Rab40c        |
| ENSMUST00000035154.3  | 0.029265313 | MGI:1913452 | 1110059G10Rik |
| ENSMUST00000061179.11 | 0.029265313 | MGI:2385139 | Rabgap1       |
| ENSMUST00000062904.10 | 0.029265313 | MGI:2443386 | Dnajc11       |
| ENSMUST00000098190.9  | 0.029265313 | MGI:1098604 | Rragd         |
| ENSMUST00000161600.7  | 0.029265313 | MGI:1098784 | Fam126b       |
| ENSMUST00000169707.7  | 0.029265313 | MGI:1328363 | Ccnt1         |
| ENSMUST00000170795.2  | 0.029265313 | MGI:1930089 | Mcm3ap        |
| ENSMUST00000055770.3  | 0.030568173 | MGI:1931523 | H1f1          |
| ENSMUST00000091458.12 | 0.031226667 | MGI:1352451 | Nr2f1         |
| ENSMUST00000160953.7  | 0.031814226 | MGI:1924879 | Sphkap        |
| ENSMUST00000021091.14 | 0.032588729 | MGI:109520  | Pafah1b1      |
| ENSMUST00000082152.4  | 0.032639566 | MGI:2444266 | Ube2o         |
| ENSMUST00000040234.8  | 0.032715704 | MGI:2141599 | Tsen2         |
| ENSMUST00000073878.11 | 0.033573827 | MGI:1298378 | Dhcr7         |
| ENSMUST00000074628.12 | 0.033738064 | MGI:104709  | Wbp2          |
| ENSMUST00000054220.9  | 0.033883643 | MGI:1924058 | Rpl18a        |
| ENSMUST00000078222.8  | 0.033883643 | MGI:99441   | Ckmt1         |
| ENSMUST00000019226.13 | 0.034491746 | MGI:1915517 | Slc25a22      |
| ENSMUST00000171796.7  | 0.03506066  | MGI:108391  | Kif1a         |

|                       |             |             |          |
|-----------------------|-------------|-------------|----------|
| ENSMUST00000020553.4  | 0.035755834 | MGI:1915294 | Chac2    |
| ENSMUST00000030332.6  | 0.035755834 | MGI:1914555 | Gpx7     |
| ENSMUST00000033941.6  | 0.035755834 | MGI:97610   | Plat     |
| ENSMUST00000034396.13 | 0.035755834 | MGI:1924366 | Mtmr2    |
| ENSMUST00000057676.6  | 0.035755834 | MGI:1914635 | Ubald2   |
| ENSMUST00000072080.9  | 0.035755834 | MGI:1914394 | Lrrc40   |
| ENSMUST00000103152.10 | 0.035755834 | MGI:1933126 | Cdk5rap3 |
| ENSMUST00000108127.3  | 0.035755834 | MGI:1920455 | C9orf72  |
| ENSMUST00000170998.8  | 0.035755834 | MGI:106921  | Scn2b    |
| ENSMUST00000216286.1  | 0.035755834 | MGI:1921763 | Neto2    |
| ENSMUST00000022614.6  | 0.035973445 | MGI:1914429 | Ccdc25   |
| ENSMUST00000023486.14 | 0.035973445 | MGI:98822   | Tfrc     |
| ENSMUST00000111159.1  | 0.035973445 | MGI:1345147 | Akt3     |
| ENSMUST00000072634.14 | 0.036057407 | MGI:88047   | Aplp2    |
| ENSMUST00000101102.1  | 0.036148251 | MGI:2663511 | Reps2    |
| ENSMUST00000022573.16 | 0.038097231 | MGI:95421   | Esd      |
| ENSMUST00000229854.1  | 0.038467365 | MGI:108202  | Pcbp2    |
| ENSMUST00000001242.8  | 0.038621292 | MGI:1351861 | Gatd3a   |
| ENSMUST00000037813.4  | 0.038621292 | MGI:95780   | Gnaz     |
| ENSMUST00000102525.10 | 0.03958846  | MGI:1928375 | Arpc3    |
| ENSMUST00000211214.1  | 0.03958846  | MGI:1342299 | Ruvbl2   |
| ENSMUST00000106348.7  | 0.039938503 | MGI:87994   | Aldoa    |
| ENSMUST00000106348.7  | 0.039938503 | MGI:87994   | Aldoa    |
| ENSMUST00000106348.7  | 0.039938503 | MGI:87994   | Aldoa    |
| ENSMUST00000106348.7  | 0.039938503 | MGI:87994   | Aldoa    |
| ENSMUST00000001485.9  | 0.040215434 | MGI:1333801 | Mrpl10   |
| ENSMUST00000066791.6  | 0.040215434 | MGI:2144891 | Tmem179  |
| ENSMUST00000093169.2  | 0.040215434 | MGI:3650635 | Gm12166  |
| ENSMUST00000112507.3  | 0.040215434 | MGI:1919972 | Fam98a   |
| ENSMUST00000136008.7  | 0.040215434 | MGI:1914706 | Ergic2   |
| ENSMUST00000169020.7  | 0.040215434 | MGI:104967  | Glg1     |
| ENSMUST00000037380.14 | 0.042664367 | MGI:1330848 | Atp8a1   |
| ENSMUST00000020446.10 | 0.043468399 | MGI:1915462 | Tmbim4   |
| ENSMUST00000025904.11 | 0.043468399 | MGI:1859821 | Prdx5    |
| ENSMUST00000031841.8  | 0.043468399 | MGI:1933972 | Tra2a    |
| ENSMUST00000107843.10 | 0.043468399 | MGI:107846  | Prmt1    |
| ENSMUST00000047889.12 | 0.043777469 | MGI:88109   | Atp1b2   |
| ENSMUST00000001566.9  | 0.044427596 | MGI:107812  | Tubb5    |
| ENSMUST00000002855.13 | 0.045606025 | MGI:1915387 | Kdelr1   |

|                       |             |             |         |
|-----------------------|-------------|-------------|---------|
| ENSMUST00000022148.6  | 0.045946096 | MGI:1925288 | Mccc2   |
| ENSMUST00000100330.9  | 0.045946096 | MGI:2444121 | Tanc2   |
| ENSMUST00000127405.1  | 0.045946096 | MGI:1098547 | Nhp2    |
| ENSMUST00000055990.7  | 0.046064074 | MGI:1096317 | Eef1a2  |
| ENSMUST00000103075.10 | 0.047842388 | MGI:104560  | Nsf     |
| ENSMUST00000104983.1  | 0.047896169 | MGI:3612447 | Rbm8a2  |
| ENSMUST00000034138.6  | 0.048770869 | MGI:1931882 | Dnaja2  |
| ENSMUST00000073868.8  | 0.048770869 | MGI:106095  | Naca    |
| ENSMUST00000090569.9  | 0.049599959 | MGI:1347009 | Psma5   |
| ENSMUST00000160027.7  | 0.049599959 | MGI:104883  | Psma3   |
| ENSMUST00000221220.1  | 0.050344807 | MGI:2673872 | Syt16   |
| ENSMUST00000222517.1  | 0.050344807 | MGI:88564   | Ctsl    |
| ENSMUST00000028087.5  | 0.050458748 | MGI:1915107 | Ppp6c   |
| ENSMUST00000184744.1  | 0.050458748 | MGI:2145823 | Kctd12  |
| ENSMUST00000021425.7  | 0.050769235 | MGI:2387603 | Ahsa1   |
| ENSMUST00000233710.1  | 0.052784156 | MGI:6270466 | Gm49804 |
| ENSMUST00000102593.10 | 0.052969939 | MGI:1860763 | Eif3i   |
| ENSMUST00000000476.14 | 0.053463689 | MGI:97530   | Pdgfra  |
| ENSMUST00000001712.7  | 0.053463689 | MGI:1298375 | Cabin1  |
| ENSMUST00000003906.12 | 0.053463689 | MGI:1913840 | Farsa   |
| ENSMUST00000016294.7  | 0.053463689 | MGI:1345185 | Tenm1   |
| ENSMUST00000019405.3  | 0.053463689 | MGI:2443304 | Map1s   |
| ENSMUST00000021832.6  | 0.053463689 | MGI:1926153 | Wrnip1  |
| ENSMUST00000023776.12 | 0.053463689 | MGI:1928745 | Slc4a8  |
| ENSMUST00000025930.9  | 0.053463689 | MGI:1339795 | Smc3    |
| ENSMUST00000026699.14 | 0.053463689 | MGI:1351638 | Mkln1   |
| ENSMUST00000029355.8  | 0.053463689 | MGI:2139740 | Ppm1l   |
| ENSMUST00000029911.11 | 0.053463689 | MGI:1913875 | Pnir    |
| ENSMUST00000029925.9  | 0.053463689 | MGI:1915743 | Ndufaf4 |
| ENSMUST00000040202.14 | 0.053463689 | MGI:2446242 | Atxn2l  |
| ENSMUST00000041589.5  | 0.053463689 | MGI:1349721 | Tob1    |
| ENSMUST00000042288.7  | 0.053463689 | MGI:2145525 | Asb13   |
| ENSMUST00000042868.5  | 0.053463689 | MGI:88258   | Camk4   |
| ENSMUST00000043082.15 | 0.053463689 | MGI:1914702 | Pnpla8  |
| ENSMUST00000045840.4  | 0.053463689 | MGI:2441758 | Gpr26   |
| ENSMUST00000046603.14 | 0.053463689 | MGI:2442153 | Gak     |
| ENSMUST00000046839.9  | 0.053463689 | MGI:107757  | Gfer    |
| ENSMUST00000048155.15 | 0.053463689 | MGI:1914289 | Rbm25   |
| ENSMUST00000051400.7  | 0.053463689 | MGI:1932403 | Cyp4x1  |

|                       |             |             |          |
|-----------------------|-------------|-------------|----------|
| ENSMUST00000054960.7  | 0.053463689 | MGI:2443921 | Irf2bp2  |
| ENSMUST00000057228.1  | 0.053463689 | MGI:2136744 | Pcdhb9   |
| ENSMUST00000060067.11 | 0.053463689 | MGI:1933786 | Dnaja3   |
| ENSMUST00000061331.13 | 0.053463689 | MGI:1919942 | Hnrnp11  |
| ENSMUST00000071921.12 | 0.053463689 | MGI:1344415 | Dmtf1    |
| ENSMUST00000074240.3  | 0.053463689 | MGI:1927576 | Dipk1b   |
| ENSMUST00000075387.10 | 0.053463689 | MGI:1935121 | Sez6l    |
| ENSMUST00000081946.4  | 0.053463689 | MGI:1913775 | Timm50   |
| ENSMUST00000084474.5  | 0.053463689 | MGI:2442466 | Frmd3    |
| ENSMUST00000086023.11 | 0.053463689 | MGI:2137594 | Galnt17  |
| ENSMUST00000094639.9  | 0.053463689 | MGI:1306776 | Map1a    |
| ENSMUST00000099329.4  | 0.053463689 | MGI:1934835 | Ube2n    |
| ENSMUST00000113560.7  | 0.053463689 | MGI:109606  | Fnbp1    |
| ENSMUST00000115804.8  | 0.053463689 | MGI:1920909 | Pdxdc1   |
| ENSMUST00000140076.1  | 0.053463689 | MGI:2387203 | Ppat     |
| ENSMUST00000168423.8  | 0.053463689 | MGI:108051  | Smad2    |
| ENSMUST00000211887.1  | 0.053463689 | MGI:2442402 | Cnot1    |
| ENSMUST00000211896.1  | 0.053463689 | MGI:3646208 | Btbd8    |
| ENSMUST00000221877.1  | 0.053463689 | MGI:1289332 | Eipr1    |
| ENSMUST00000225980.1  | 0.053463689 | MGI:1354757 | Atp9b    |
| ENSMUST00000235957.1  | 0.053463689 | MGI:109162  | Gpam     |
| ENSMUST00000022803.5  | 0.053581613 | MGI:1194513 | Psmb5    |
| ENSMUST00000080882.10 | 0.053595849 | MGI:88107   | Atp1a3   |
| ENSMUST00000030660.8  | 0.055333806 | MGI:1351486 | Trappc3  |
| ENSMUST00000075491.13 | 0.055365265 | MGI:1341070 | Fkbp8    |
| ENSMUST00000065865.9  | 0.055423761 | MGI:1913481 | Thoc7    |
| ENSMUST00000025319.6  | 0.056096884 | MGI:1914926 | Rpp21    |
| ENSMUST00000027795.13 | 0.056096884 | MGI:1920228 | Cnih3    |
| ENSMUST00000028081.12 | 0.056096884 | MGI:1914698 | Plxdc2   |
| ENSMUST00000029644.15 | 0.056096884 | MGI:1922026 | Ppa2     |
| ENSMUST00000046283.15 | 0.056096884 | MGI:1309463 | Hspa13   |
| ENSMUST00000047835.7  | 0.056096884 | MGI:1919443 | Scaf11   |
| ENSMUST00000064701.7  | 0.056096884 | MGI:2384987 | B4galt7  |
| ENSMUST00000088345.11 | 0.056096884 | MGI:1353598 | Mapk8ip3 |
| ENSMUST00000108336.7  | 0.056096884 | MGI:99207   | Zfp60    |
| ENSMUST00000119878.7  | 0.056096884 | MGI:1330299 | Dyrk1a   |
| ENSMUST00000153627.7  | 0.056096884 | MGI:1920036 | Tdp1     |
| ENSMUST00000167020.7  | 0.056096884 | MGI:2387357 | Wac      |
| ENSMUST00000169464.8  | 0.056096884 | MGI:2138865 | Dlgap4   |

|                       |             |             |               |
|-----------------------|-------------|-------------|---------------|
| ENSMUST00000211283.1  | 0.056992135 | MGI:1915816 | Caly          |
| ENSMUST00000022871.6  | 0.057697563 | MGI:1349165 | Sdc2          |
| ENSMUST00000052138.10 | 0.057697563 | MGI:1929871 | Terf2ip       |
| ENSMUST00000109418.1  | 0.057697563 | MGI:2444508 | Fitm2         |
| ENSMUST00000009699.15 | 0.058773477 | MGI:1328368 | Cdk9          |
| ENSMUST00000016105.8  | 0.058773477 | MGI:87948   | Adss          |
| ENSMUST00000027495.14 | 0.058773477 | MGI:97298   | Septin2       |
| ENSMUST00000027495.14 | 0.058773477 | MGI:97298   | Septin2       |
| ENSMUST00000027495.14 | 0.058773477 | MGI:97298   | Septin2       |
| ENSMUST00000027495.14 | 0.058773477 | MGI:97298   | Septin2       |
| ENSMUST00000028205.9  | 0.058773477 | MGI:2385132 | BC005624      |
| ENSMUST00000030028.4  | 0.058773477 | MGI:1923549 | Erp44         |
| ENSMUST00000037912.11 | 0.058773477 | MGI:2679255 | Ssh2          |
| ENSMUST00000112091.8  | 0.058773477 | MGI:1890695 | Rab9          |
| ENSMUST00000132374.8  | 0.058773477 | MGI:1916971 | Nkiras1       |
| ENSMUST00000190647.2  | 0.058773477 | MGI:3044626 | Begain        |
| ENSMUST00000220578.1  | 0.058773477 | MGI:1346087 | Srp54a        |
| ENSMUST00000238036.1  | 0.058773477 | MGI:1289301 | Ubxn1         |
| ENSMUST00000022212.8  | 0.059203921 | MGI:1099790 | Plk2          |
| ENSMUST00000067630.12 | 0.05954634  | MGI:1914421 | Dram2         |
| ENSMUST00000068505.9  | 0.05954634  | MGI:88264   | Capn2         |
| ENSMUST00000079703.10 | 0.05954634  | MGI:1915751 | Nsmce2        |
| ENSMUST00000018449.10 | 0.060128385 | MGI:2179381 | Prpf8         |
| ENSMUST00000023918.12 | 0.060128385 | MGI:2152389 | lvns1abp      |
| ENSMUST00000006625.7  | 0.060582517 | MGI:1929092 | Rbm14         |
| ENSMUST00000025811.5  | 0.060582517 | MGI:1915340 | Yif1a         |
| ENSMUST00000030568.13 | 0.060582517 | MGI:107557  | Sema3c        |
| ENSMUST00000032508.10 | 0.060582517 | MGI:95543   | Fkbp4         |
| ENSMUST00000043884.5  | 0.060946726 | MGI:106036  | Lrrn3         |
| ENSMUST00000092325.10 | 0.060946726 | MGI:2388640 | Plppr3        |
| ENSMUST00000120722.1  | 0.061245315 | MGI:1914278 | 2610002M06Rik |
| ENSMUST00000023612.16 | 0.061494554 | MGI:95456   | Ets2          |
| ENSMUST00000021447.8  | 0.061705742 | MGI:1349473 | Ppp2r5e       |
| ENSMUST00000014546.14 | 0.061886975 | MGI:106581  | Tsg101        |
| ENSMUST00000038128.14 | 0.061886975 | MGI:1915789 | Tmem109       |
| ENSMUST00000166658.7  | 0.062508491 | MGI:1928753 | Pfdn5         |
| ENSMUST00000090002.9  | 0.062872123 | MGI:104819  | Hnrnpa2b1     |
| ENSMUST00000004072.9  | 0.06668146  | MGI:1350927 | Rpl8          |
| ENSMUST00000041096.3  | 0.066753305 | MGI:1353431 | Pcsk1n        |

|                       |             |             |          |
|-----------------------|-------------|-------------|----------|
| ENSMUST00000024932.11 | 0.069045748 | MGI:88116   | Atp6v0c  |
| ENSMUST00000007482.7  | 0.069421966 | MGI:108180  | Mrpl49   |
| ENSMUST00000037687.7  | 0.071518992 | MGI:1914814 | Tmem35a  |
| ENSMUST00000211649.1  | 0.071782746 | MGI:107996  | Slc8a2   |
| ENSMUST00000033236.8  | 0.072286687 | MGI:2444479 | Thumpd1  |
| ENSMUST00000028083.5  | 0.072395271 | MGI:107637  | Psmb7    |
| ENSMUST00000045562.5  | 0.073104871 | MGI:1920112 | Cox15    |
| ENSMUST00000051589.8  | 0.074108821 | MGI:1914868 | Aasdhppt |
| ENSMUST00000140438.1  | 0.074108821 | MGI:1928140 | Mrps25   |
| ENSMUST00000202281.3  | 0.074108821 | MGI:1913299 | Rogdi    |
| ENSMUST00000215619.1  | 0.074108821 | MGI:105387  | Cdkn2d   |
| ENSMUST00000016033.8  | 0.075369903 | MGI:96836   | Lta4h    |
| ENSMUST00000038942.9  | 0.077001412 | MGI:2441670 | Pbxip1   |
| ENSMUST00000080208.6  | 0.077001412 | MGI:103008  | Epb41l3  |
| ENSMUST00000172951.1  | 0.077001412 | MGI:1351344 | Grm7     |
| ENSMUST00000201452.3  | 0.078349065 | MGI:105053  | Hsph1    |
| ENSMUST00000007236.4  | 0.078982932 | MGI:1341881 | Syngn3   |
| ENSMUST00000002683.2  | 0.079194661 | MGI:1196455 | Ccdc97   |
| ENSMUST00000009003.8  | 0.079194661 | MGI:1927243 | Rala     |
| ENSMUST00000013693.10 | 0.079194661 | MGI:1343485 | Commd8   |
| ENSMUST00000027067.14 | 0.079194661 | MGI:95856   | Gsta3    |
| ENSMUST00000029135.14 | 0.079194661 | MGI:1890410 | Acss2    |
| ENSMUST00000096753.4  | 0.079194661 | MGI:1915943 | Hnrnpul2 |
| ENSMUST00000033157.9  | 0.08219401  | MGI:1917566 | Ndufab1  |
| ENSMUST00000034524.4  | 0.082231979 | MGI:1888981 | Rexo2    |
| ENSMUST00000020022.7  | 0.082300102 | MGI:1931437 | Smpd3a   |
| ENSMUST00000021082.6  | 0.082300102 | MGI:1354954 | Nt5c     |
| ENSMUST00000026607.14 | 0.082300102 | MGI:892979  | Chm      |
| ENSMUST00000029147.15 | 0.082300102 | MGI:1316706 | Nfs1     |
| ENSMUST00000037280.4  | 0.082300102 | MGI:2443626 | Vps18    |
| ENSMUST00000042824.12 | 0.082300102 | MGI:2384589 | Herc1    |
| ENSMUST00000043160.12 | 0.082300102 | MGI:1276102 | Aqr      |
| ENSMUST00000063669.7  | 0.082300102 | MGI:2141813 | Dhx32    |
| ENSMUST00000070345.4  | 0.082300102 | MGI:107622  | Usp39    |
| ENSMUST00000071891.11 | 0.082300102 | MGI:1890496 | Elac2    |
| ENSMUST00000124341.7  | 0.082300102 | MGI:109350  | Slc4a3   |
| ENSMUST00000022529.7  | 0.08325625  | MGI:105992  | Tkt      |
| ENSMUST00000034623.7  | 0.085751482 | MGI:1926211 | Trappc4  |
| ENSMUST00000058437.13 | 0.08600857  | MGI:98073   | Rpl7     |

|                       |             |             |           |
|-----------------------|-------------|-------------|-----------|
| ENSMUST00000122010.7  | 0.08600857  | MGI:1929711 | Anapc7    |
| ENSMUST00000024763.9  | 0.087036244 | MGI:1915815 | Mrps18a   |
| ENSMUST00000025314.6  | 0.087036244 | MGI:1914089 | Dele1     |
| ENSMUST00000029445.12 | 0.087036244 | MGI:97376   | Nras      |
| ENSMUST00000035027.12 | 0.087036244 | MGI:1929897 | Clstn2    |
| ENSMUST00000035597.9  | 0.087036244 | MGI:1920468 | Sppl2b    |
| ENSMUST00000037726.13 | 0.087036244 | MGI:1921050 | Tmtc4     |
| ENSMUST00000040962.5  | 0.087036244 | MGI:94203   | Nudt19    |
| ENSMUST00000042163.14 | 0.087036244 | MGI:2442563 | Naa25     |
| ENSMUST00000061611.14 | 0.087036244 | MGI:2443419 | Rps6kc1   |
| ENSMUST00000072079.8  | 0.087036244 | MGI:1929721 | Rrs1      |
| ENSMUST00000113520.7  | 0.087036244 | MGI:103178  | Vegfa     |
| ENSMUST00000114160.1  | 0.087036244 | MGI:1351626 | Fam50a    |
| ENSMUST00000118919.8  | 0.087036244 | MGI:1925658 | Fam131a   |
| ENSMUST00000128166.7  | 0.087036244 | MGI:1923452 | Zdhhc2    |
| ENSMUST00000130481.1  | 0.087036244 | MGI:3647874 | Plcx2     |
| ENSMUST00000162175.8  | 0.087036244 | MGI:2145645 | Exoc5     |
| ENSMUST00000166768.2  | 0.087036244 | MGI:1926029 | Spata2l   |
| ENSMUST00000228284.1  | 0.087036244 | MGI:1918724 | Ppp6r2    |
| ENSMUST00000110894.8  | 0.087607992 | MGI:104890  | Tpt1      |
| ENSMUST00000112932.1  | 0.088562014 | MGI:2442998 | Zbtb6     |
| ENSMUST00000008517.12 | 0.089001432 | MGI:1916238 | Prpf31    |
| ENSMUST00000016081.12 | 0.089210123 | MGI:1349392 | Macroh2a1 |
| ENSMUST00000049972.5  | 0.091025186 | MGI:103033  | Scg2      |
| ENSMUST00000135192.7  | 0.091025186 | MGI:1334462 | Copa      |
| ENSMUST00000110690.8  | 0.09175375  | MGI:1914291 | Oxct1     |
| ENSMUST00000048393.7  | 0.091794871 | MGI:1915368 | Atg101    |
| ENSMUST00000058814.6  | 0.091794871 | MGI:2442454 | Rab9b     |
| ENSMUST00000068056.11 | 0.091794871 | MGI:99240   | Ddx39b    |
| ENSMUST00000018568.3  | 0.093409536 | MGI:1342307 | Drg2      |
| ENSMUST00000027464.8  | 0.093409536 | MGI:1916413 | Mrpl44    |
| ENSMUST00000044299.2  | 0.093409536 | MGI:98327   | Sstr1     |
| ENSMUST00000021471.12 | 0.093484737 | MGI:1919986 | Tmx1      |
| ENSMUST00000025394.13 | 0.094711735 | MGI:1913536 | Sec11c    |
| ENSMUST00000004281.9  | 0.095144914 | MGI:1330301 | Dyrk2     |
| ENSMUST00000004294.11 | 0.095144914 | MGI:109187  | Kifc2     |
| ENSMUST00000004920.3  | 0.095144914 | MGI:1352758 | Ulk2      |
| ENSMUST00000005017.14 | 0.095144914 | MGI:1194494 | Hdgf      |
| ENSMUST00000020564.6  | 0.095144914 | MGI:106180  | Shc2      |

|                       |             |             |         |
|-----------------------|-------------|-------------|---------|
| ENSMUST00000022480.7  | 0.095144914 | MGI:3616088 | Ogdhl   |
| ENSMUST00000024805.14 | 0.095144914 | MGI:2385908 | Cpne5   |
| ENSMUST00000025109.7  | 0.095144914 | MGI:1919782 | Sap130  |
| ENSMUST00000028200.8  | 0.095144914 | MGI:1353568 | Tor1a   |
| ENSMUST00000030925.2  | 0.095144914 | MGI:95622   | Gabrd   |
| ENSMUST00000032895.14 | 0.095144914 | MGI:1858179 | Nucb2   |
| ENSMUST00000033532.6  | 0.095144914 | MGI:1202294 | Aff2    |
| ENSMUST00000034763.9  | 0.095144914 | MGI:2157166 | Rp9     |
| ENSMUST00000034905.8  | 0.095144914 | MGI:104990  | Gclc    |
| ENSMUST00000036904.6  | 0.095144914 | MGI:1923091 | Rnf139  |
| ENSMUST00000039327.10 | 0.095144914 | MGI:2677061 | Dagla   |
| ENSMUST00000043551.10 | 0.095144914 | MGI:1918047 | Ankib1  |
| ENSMUST00000048248.8  | 0.095144914 | MGI:2685946 | Brsk1   |
| ENSMUST00000054234.9  | 0.095144914 | MGI:1891638 | Nek6    |
| ENSMUST00000064404.7  | 0.095144914 | MGI:1353653 | Glr3    |
| ENSMUST00000067545.7  | 0.095144914 | MGI:2684937 | Lclat1  |
| ENSMUST00000070673.8  | 0.095144914 | MGI:1914603 | Rab31   |
| ENSMUST00000071325.8  | 0.095144914 | MGI:97306   | Nf1     |
| ENSMUST00000074053.5  | 0.095144914 | MGI:3704317 | Sap18b  |
| ENSMUST00000077115.12 | 0.095144914 | MGI:1097152 | Ptpro   |
| ENSMUST00000085913.10 | 0.095144914 | MGI:88106   | Atp1a2  |
| ENSMUST00000091920.5  | 0.095144914 | MGI:2147194 | Rbm27   |
| ENSMUST00000092170.6  | 0.095144914 | MGI:1914476 | Tmem19  |
| ENSMUST00000093943.9  | 0.095144914 | MGI:105369  | Cbx1    |
| ENSMUST00000098346.4  | 0.095144914 | MGI:2150656 | Man2a2  |
| ENSMUST00000100024.2  | 0.095144914 | MGI:109183  | Fgf12   |
| ENSMUST00000100203.9  | 0.095144914 | MGI:2145977 | Dip2b   |
| ENSMUST00000103197.4  | 0.095144914 | MGI:1921285 | Nol9    |
| ENSMUST00000107283.7  | 0.095144914 | MGI:1923992 | Snx27   |
| ENSMUST00000108249.8  | 0.095144914 | MGI:99260   | Prkci   |
| ENSMUST00000111108.9  | 0.095144914 | MGI:109284  | Psen2   |
| ENSMUST00000115118.7  | 0.095144914 | MGI:1919834 | Cul4b   |
| ENSMUST00000116563.7  | 0.095144914 | MGI:107953  | Klc2    |
| ENSMUST00000119944.7  | 0.095144914 | MGI:3580376 | Lemd3   |
| ENSMUST00000143278.7  | 0.095144914 | MGI:1923406 | Fam131b |
| ENSMUST00000151390.7  | 0.095144914 | MGI:108247  | Tdg     |
| ENSMUST00000159584.2  | 0.095144914 | MGI:1920464 | Nwd2    |
| ENSMUST00000173078.7  | 0.095144914 | MGI:1098801 | Otud4   |
| ENSMUST00000182078.8  | 0.095144914 | MGI:88025   | Ank2    |



|                       |             |             |          |
|-----------------------|-------------|-------------|----------|
| ENSMUST00000219263.1  | 0.095144914 | MGI:1309528 | Ppp1r12a |
| ENSMUST00000226810.1  | 0.095144914 | MGI:1922667 | Rspo2    |
| ENSMUST00000005493.13 | 0.096019926 | MGI:99917   | Slc1a3   |
| ENSMUST00000034859.14 | 0.096019926 | MGI:1926014 | Fbxo22   |
| ENSMUST00000037115.8  | 0.096019926 | MGI:1917040 | Med30    |
| ENSMUST00000040881.13 | 0.096019926 | MGI:1924029 | Cluap1   |
| ENSMUST00000070330.13 | 0.096019926 | MGI:1341299 | Dnm3     |
| ENSMUST00000114200.9  | 0.096019926 | MGI:1925573 | Fam219b  |
| ENSMUST00000030207.14 | 0.096260288 | MGI:2142116 | Psip1    |
| ENSMUST00000034883.6  | 0.096260288 | MGI:1916356 | Stoml1   |
| ENSMUST00000166855.2  | 0.096260288 | MGI:2180756 | Mchr1    |
| ENSMUST00000191601.6  | 0.098063747 | MGI:107765  | Apbb1    |
| ENSMUST00000079949.12 | 0.098855676 | MGI:99960   | Ewsr1    |
| ENSMUST00000190827.6  | 0.099729136 | MGI:1343180 | Vgf      |
| ENSMUST00000046288.15 | 0.100552352 | MGI:1890894 | Ndufv3   |
| ENSMUST00000020343.8  | 0.101776786 | MGI:894308  | Rab21    |
| ENSMUST00000031034.11 | 0.101776786 | MGI:2183436 | Nrbp1    |
| ENSMUST00000031739.5  | 0.101776786 | MGI:1922853 | Ppp1r35  |
| ENSMUST00000045846.11 | 0.101776786 | MGI:2137681 | Sfxn5    |
| ENSMUST00000056732.3  | 0.101776786 | MGI:3694697 | Mfap1b   |
| ENSMUST00000077693.9  | 0.101776786 | MGI:95300   | Eif2b4   |
| ENSMUST00000099525.4  | 0.101776786 | MGI:2683212 | Ranbp6   |
| ENSMUST00000166750.8  | 0.101776786 | MGI:1921690 | Cmip     |
| ENSMUST00000024762.2  | 0.104041557 | MGI:1922814 | Rsph9    |
| ENSMUST00000046533.8  | 0.104041557 | MGI:3487246 | Prr7     |
| ENSMUST00000026387.10 | 0.105184377 | MGI:1913961 | Sbds     |
| ENSMUST00000169681.2  | 0.105184377 | MGI:95304   | Eif4b    |
| ENSMUST00000021802.15 | 0.105873445 | MGI:1914502 | Cap2     |
| ENSMUST00000005406.11 | 0.106681691 | MGI:88059   | App      |
| ENSMUST00000058438.8  | 0.108965898 | MGI:1919083 | Dcaf7    |
| ENSMUST00000119430.2  | 0.109165479 | MGI:1914880 | Samd8    |
| ENSMUST00000102598.3  | 0.109547894 | MGI:1194912 | Rbbp4    |
| ENSMUST00000020109.4  | 0.110083023 | MGI:1914269 | Actr6    |
| ENSMUST00000022378.8  | 0.110083023 | MGI:1354385 | Ero1l    |
| ENSMUST00000032738.6  | 0.110083023 | MGI:99779   | Chrna7   |
| ENSMUST00000048774.12 | 0.110083023 | MGI:1858683 | Copg2    |
| ENSMUST00000067101.9  | 0.110083023 | MGI:104742  | Kcnj3    |
| ENSMUST00000068911.12 | 0.110083023 | MGI:95624   | Gabrg3   |
| ENSMUST00000088373.10 | 0.110083023 | MGI:2152938 | Srgap3   |

|                       |             |             |         |
|-----------------------|-------------|-------------|---------|
| ENSMUST00000102483.4  | 0.110083023 | MGI:3040672 | Rpl23a  |
| ENSMUST00000108297.2  | 0.110083023 | MGI:2685870 | Pdp1    |
| ENSMUST00000154330.1  | 0.110083023 | MGI:1928142 | Mrps24  |
| ENSMUST00000169861.8  | 0.110083023 | MGI:1927197 | Shoc2   |
| ENSMUST00000182660.7  | 0.110083023 | MGI:1913754 | Prrc2c  |
| ENSMUST00000220509.1  | 0.110083023 | MGI:1349475 | Ppp2r5c |
| ENSMUST00000014913.10 | 0.110732809 | MGI:104884  | Psmbl1  |
| ENSMUST00000006764.8  | 0.110917849 | MGI:88061   | Aprt    |
| ENSMUST00000028981.8  | 0.11205375  | MGI:891995  | Mapre1  |
| ENSMUST00000078084.6  | 0.112198851 | MGI:106498  | Rsrp1   |
| ENSMUST00000014990.12 | 0.114347356 | MGI:1915221 | Tppp3   |
| ENSMUST00000020741.11 | 0.114347356 | MGI:1343297 | Drg1    |
| ENSMUST00000030942.12 | 0.114347356 | MGI:2137221 | Mrpl20  |
| ENSMUST00000072726.6  | 0.114347356 | MGI:1860197 | Wdr7    |
| ENSMUST00000006235.8  | 0.114641334 | MGI:88561   | Ctsb    |
| ENSMUST00000068259.9  | 0.114728152 | MGI:1924038 | Klhdc10 |
| ENSMUST00000023749.14 | 0.115930755 | MGI:99682   | Tmbim6  |
| ENSMUST00000032373.11 | 0.116049678 | MGI:96763   | Ldhd    |
| ENSMUST00000187839.7  | 0.116515814 | MGI:109153  | Ktn1    |
| ENSMUST00000000925.9  | 0.116823684 | MGI:1328366 | Smrbc1  |
| ENSMUST00000007747.9  | 0.116823684 | MGI:2147092 | Dus3l   |
| ENSMUST00000019614.12 | 0.116823684 | MGI:1914689 | Xab2    |
| ENSMUST00000021368.9  | 0.116823684 | MGI:1918305 | Nemf    |
| ENSMUST00000045312.5  | 0.116823684 | MGI:1344345 | Smc1a   |
| ENSMUST00000052566.7  | 0.116823684 | MGI:2144113 | Tmem199 |
| ENSMUST00000059042.13 | 0.116823684 | MGI:1202722 | Gtf2i   |
| ENSMUST00000103208.1  | 0.116823684 | MGI:1196277 | Tmem201 |
| ENSMUST00000179163.2  | 0.117606118 | MGI:1929514 | Mlst8   |
| ENSMUST00000110082.10 | 0.119452332 | MGI:88251   | Calm1   |
| ENSMUST00000054908.9  | 0.119963459 | MGI:1915205 | Sugt1   |
| ENSMUST00000163230.7  | 0.119963459 | MGI:1196990 | Cd200   |
| ENSMUST00000030513.12 | 0.120661792 | MGI:1917152 | Mrto4   |
| ENSMUST00000087600.9  | 0.120661792 | MGI:95678   | Gda     |
| ENSMUST00000053413.11 | 0.122237729 | MGI:101764  | Cdk5r1  |
| ENSMUST00000019937.4  | 0.123113995 | MGI:2155302 | Sec63   |
| ENSMUST00000021239.6  | 0.123113995 | MGI:2138133 | Lrrc59  |
| ENSMUST00000025193.13 | 0.123113995 | MGI:99495   | Brd2    |
| ENSMUST00000033775.8  | 0.123113995 | MGI:105941  | Mpp1    |
| ENSMUST00000033899.13 | 0.123113995 | MGI:88455   | Col4a2  |

|                       |             |             |          |
|-----------------------|-------------|-------------|----------|
| ENSMUST00000036299.13 | 0.123113995 | MGI:2135957 | Camta2   |
| ENSMUST00000045396.8  | 0.123113995 | MGI:1918867 | Armh3    |
| ENSMUST00000046011.11 | 0.123113995 | MGI:2684913 | Nol10    |
| ENSMUST00000054145.7  | 0.123113995 | MGI:2444785 | Dcaf5    |
| ENSMUST00000066208.12 | 0.123113995 | MGI:108186  | Aldh7a1  |
| ENSMUST00000067414.12 | 0.123113995 | MGI:2183683 | Nav1     |
| ENSMUST00000072735.8  | 0.123113995 | MGI:2384888 | Fam173a  |
| ENSMUST00000075845.10 | 0.123113995 | MGI:1929494 | Arhgap35 |
| ENSMUST00000088652.5  | 0.123113995 | MGI:1919709 | Htatsf1  |
| ENSMUST00000099194.3  | 0.123113995 | MGI:2139328 | Tspyl3   |
| ENSMUST00000105561.8  | 0.123113995 | MGI:1351338 | Grm1     |
| ENSMUST00000108593.7  | 0.123113995 | MGI:1914431 | Ctdnep1  |
| ENSMUST00000134077.1  | 0.123113995 | MGI:5141986 | Gm20521  |
| ENSMUST00000152796.7  | 0.123113995 | MGI:2444233 | Ythdf2   |
| ENSMUST00000156859.2  | 0.123113995 | MGI:2135593 | Hadha    |
| ENSMUST00000239079.1  | 0.123113995 | MGI:1919375 | Amer2    |
| ENSMUST00000142247.7  | 0.123113995 | NA          | NA       |
| ENSMUST00000021381.5  | 0.123139996 | MGI:1100514 | Pnn      |
| ENSMUST00000114276.2  | 0.123139996 | MGI:1349765 | Rcn2     |
| ENSMUST00000115559.9  | 0.123139996 | MGI:107743  | Dync1i1  |
| ENSMUST00000037918.11 | 0.123145796 | MGI:1915128 | Tmem33   |
| ENSMUST00000165649.3  | 0.125484391 | MGI:1913342 | Ghitm    |
| ENSMUST00000062264.7  | 0.125967802 | MGI:1934811 | Nucks1   |
| ENSMUST00000166497.8  | 0.126151367 | MGI:1913332 | Abhd6    |
| ENSMUST00000002172.13 | 0.126885279 | MGI:87882   | Acp2     |
| ENSMUST00000021203.6  | 0.126885279 | MGI:1929742 | Timm22   |
| ENSMUST00000026274.13 | 0.126885279 | MGI:1934860 | Lztf11   |
| ENSMUST00000035871.14 | 0.126885279 | MGI:1916720 | Tmem127  |
| ENSMUST00000038407.5  | 0.126885279 | MGI:1914807 | Larp6    |
| ENSMUST00000050785.13 | 0.126885279 | MGI:96757   | Lcn2     |
| ENSMUST00000078717.6  | 0.126885279 | MGI:2443542 | Lrrc58   |
| ENSMUST00000171975.7  | 0.126885279 | MGI:1344363 | Arih1    |
| ENSMUST00000134214.2  | 0.128004826 | MGI:6155101 | Gm49450  |
| ENSMUST00000001452.13 | 0.128798354 | MGI:104708  | Cct3     |
| ENSMUST00000034929.6  | 0.128798354 | MGI:1933395 | Lactb    |
| ENSMUST00000091967.12 | 0.128798354 | MGI:108092  | Bin1     |
| ENSMUST00000030914.3  | 0.129070862 | MGI:1915080 | Rer1     |
| ENSMUST00000057829.3  | 0.129955131 | MGI:107329  | Mrpl50   |
| ENSMUST00000148665.7  | 0.129955131 | MGI:104912  | Sf3a2    |

|                       |             |             |               |
|-----------------------|-------------|-------------|---------------|
| ENSMUST00000111336.9  | 0.135710782 | MGI:1913302 | Sdhc          |
| ENSMUST00000017610.9  | 0.138554865 | MGI:98753   | Timp2         |
| ENSMUST00000027587.14 | 0.138554865 | MGI:1920199 | Ccnt2         |
| ENSMUST00000033634.4  | 0.138554865 | MGI:1354713 | Acsl4         |
| ENSMUST00000173804.7  | 0.138554865 | MGI:2442071 | Gprasp2       |
| ENSMUST00000031072.13 | 0.139678937 | MGI:1098673 | Anapc4        |
| ENSMUST00000041023.13 | 0.139678937 | MGI:1918944 | Ipo9          |
| ENSMUST00000168115.7  | 0.139678937 | MGI:2384838 | Prpsap2       |
| ENSMUST00000228307.1  | 0.139678937 | MGI:107433  | Cdh9          |
| ENSMUST00000002572.5  | 0.141711956 | MGI:1890662 | Slc9a3r2      |
| ENSMUST00000006854.12 | 0.141711956 | MGI:1918722 | Usp19         |
| ENSMUST00000021133.15 | 0.141711956 | MGI:1917447 | Srp68         |
| ENSMUST00000028004.10 | 0.141711956 | MGI:1861622 | Aldh9a1       |
| ENSMUST00000032183.5  | 0.141711956 | MGI:1921372 | Tmem43        |
| ENSMUST00000036952.4  | 0.141711956 | MGI:2654705 | 9530068E07Rik |
| ENSMUST00000038361.10 | 0.141711956 | MGI:894701  | Mgat5         |
| ENSMUST00000040481.3  | 0.141711956 | MGI:2679005 | Slc38a7       |
| ENSMUST00000102919.3  | 0.141711956 | MGI:99606   | Abca2         |
| ENSMUST00000105907.8  | 0.141711956 | MGI:1098568 | Tmem222       |
| ENSMUST00000192314.1  | 0.141711956 | MGI:1922434 | Camsap2       |
| ENSMUST00000208253.1  | 0.141711956 | MGI:1922863 | Med25         |
| ENSMUST00000225805.1  | 0.141711956 | MGI:1919094 | Nupl1         |
| ENSMUST00000227729.1  | 0.141711956 | MGI:2674071 | Morn2         |
| ENSMUST00000228050.1  | 0.141711956 | MGI:1921409 | Acbd5         |
| ENSMUST00000023210.7  | 0.142482649 | MGI:1913695 | Cyc1          |
| ENSMUST00000044564.14 | 0.143170945 | MGI:2443432 | Foxj3         |
| ENSMUST00000007216.8  | 0.146089205 | MGI:1298405 | Ap2m1         |
| ENSMUST00000000314.12 | 0.146504712 | MGI:99218   | Cdh4          |
| ENSMUST00000003599.8  | 0.146504712 | MGI:1935197 | Pcdhgb6       |
| ENSMUST00000004076.4  | 0.146504712 | MGI:1351340 | Grm3          |
| ENSMUST00000008094.9  | 0.146504712 | MGI:1918946 | Abhd8         |
| ENSMUST00000008445.6  | 0.146504712 | MGI:1891839 | Phax          |
| ENSMUST00000015511.14 | 0.146504712 | MGI:2154244 | Plxnd1        |
| ENSMUST00000020182.15 | 0.146504712 | MGI:1321392 | Pex7          |
| ENSMUST00000020846.7  | 0.146504712 | MGI:107606  | Srebfl1       |
| ENSMUST00000021803.9  | 0.146504712 | MGI:2385621 | Nup153        |
| ENSMUST00000023393.14 | 0.146504712 | MGI:1921435 | Gbe1          |
| ENSMUST00000024829.7  | 0.146504712 | MGI:107704  | Abcg1         |
| ENSMUST00000025279.5  | 0.146504712 | MGI:1097712 | Npc1          |

|                       |             |             |           |
|-----------------------|-------------|-------------|-----------|
| ENSMUST00000025338.15 | 0.146504712 | MGI:1860139 | Gabbr1    |
| ENSMUST00000026252.13 | 0.146504712 | MGI:894762  | Ldb1      |
| ENSMUST00000026292.14 | 0.146504712 | MGI:1926884 | Huwe1     |
| ENSMUST00000027888.12 | 0.146504712 | MGI:87860   | Abl2      |
| ENSMUST00000027961.11 | 0.146504712 | MGI:1354164 | Hspa14    |
| ENSMUST00000029964.11 | 0.146504712 | MGI:95276   | Epha7     |
| ENSMUST00000031091.12 | 0.146504712 | MGI:1261849 | D5Erd579e |
| ENSMUST00000031446.6  | 0.146504712 | MGI:3609245 | Tmem132b  |
| ENSMUST00000032629.15 | 0.146504712 | MGI:1338801 | Cyfp1     |
| ENSMUST00000034369.9  | 0.146504712 | MGI:1096380 | Psmb10    |
| ENSMUST00000034644.9  | 0.146504712 | MGI:1918982 | Vps11     |
| ENSMUST00000036267.7  | 0.146504712 | MGI:1891160 | Chst2     |
| ENSMUST00000037609.7  | 0.146504712 | MGI:1196297 | Hgsnat    |
| ENSMUST00000038488.16 | 0.146504712 | MGI:2446134 | Sidt2     |
| ENSMUST00000039152.13 | 0.146504712 | MGI:1306823 | Dhx8      |
| ENSMUST00000040025.13 | 0.146504712 | MGI:1917799 | Tln2      |
| ENSMUST00000041097.12 | 0.146504712 | MGI:1289252 | Ppp2r2d   |
| ENSMUST00000041500.7  | 0.146504712 | MGI:104971  | Srxn1     |
| ENSMUST00000045682.6  | 0.146504712 | MGI:1925037 | Gramd1b   |
| ENSMUST00000045705.13 | 0.146504712 | MGI:2443564 | Ambra1    |
| ENSMUST00000046316.10 | 0.146504712 | MGI:2443718 | Lrig2     |
| ENSMUST00000046755.13 | 0.146504712 | MGI:105056  | Cobl      |
| ENSMUST00000047243.11 | 0.146504712 | MGI:109338  | Rap1gap   |
| ENSMUST00000047273.2  | 0.146504712 | MGI:1919186 | Rpusd1    |
| ENSMUST00000048260.14 | 0.146504712 | MGI:1917611 | Lman1     |
| ENSMUST00000053306.7  | 0.146504712 | MGI:109147  | Oxtr      |
| ENSMUST00000053871.4  | 0.146504712 | MGI:2444926 | Ckap4     |
| ENSMUST00000054598.11 | 0.146504712 | MGI:2385758 | Ablim2    |
| ENSMUST00000055352.7  | 0.146504712 | MGI:1914794 | Fam120b   |
| ENSMUST00000055485.11 | 0.146504712 | MGI:3040677 | Lsm14b    |
| ENSMUST00000056355.8  | 0.146504712 | MGI:2447776 | Nat8l     |
| ENSMUST00000057015.7  | 0.146504712 | MGI:2443878 | Slc4a7    |
| ENSMUST00000057195.16 | 0.146504712 | MGI:1351500 | Nup62     |
| ENSMUST00000060579.9  | 0.146504712 | MGI:2384966 | Mgat2     |
| ENSMUST00000060837.9  | 0.146504712 | MGI:1098586 | Rab11fip5 |
| ENSMUST00000066041.11 | 0.146504712 | MGI:3605641 | Shisa7    |
| ENSMUST00000066760.7  | 0.146504712 | MGI:2158736 | Senp3     |
| ENSMUST00000074352.10 | 0.146504712 | MGI:1927551 | Osbpl1a   |
| ENSMUST00000075068.13 | 0.146504712 | MGI:97542   | Pepd      |

|                       |             |             |          |
|-----------------------|-------------|-------------|----------|
| ENSMUST00000075117.9  | 0.146504712 | MGI:1933108 | Zxdc     |
| ENSMUST00000075666.7  | 0.146504712 | MGI:107995  | Upf1     |
| ENSMUST00000076226.12 | 0.146504712 | MGI:103234  | Herc2    |
| ENSMUST00000077569.10 | 0.146504712 | MGI:1935127 | Smarca1  |
| ENSMUST00000078482.12 | 0.146504712 | MGI:2685011 | Dchs1    |
| ENSMUST00000080812.13 | 0.146504712 | MGI:1916023 | Zc3hc1   |
| ENSMUST00000081121.3  | 0.146504712 | MGI:2137513 | Slc24a3  |
| ENSMUST00000100539.9  | 0.146504712 | MGI:1926079 | Tsc22d4  |
| ENSMUST00000103176.9  | 0.146504712 | MGI:2679684 | Mib2     |
| ENSMUST00000105307.7  | 0.146504712 | MGI:1921257 | Btbd11   |
| ENSMUST00000105327.9  | 0.146504712 | MGI:1298224 | Pip5k1c  |
| ENSMUST00000105473.2  | 0.146504712 | MGI:2139810 | Slc35f1  |
| ENSMUST00000105916.7  | 0.146504712 | MGI:2444218 | Ahdc1    |
| ENSMUST00000106653.3  | 0.146504712 | MGI:1922246 | Usp47    |
| ENSMUST00000108789.8  | 0.146504712 | MGI:2685478 | Zfp512b  |
| ENSMUST00000109583.8  | 0.146504712 | MGI:1926021 | Mctp1    |
| ENSMUST00000109699.10 | 0.146504712 | MGI:107252  | Nsun2    |
| ENSMUST00000110778.1  | 0.146504712 | MGI:1923831 | Wipi2    |
| ENSMUST00000112046.1  | 0.146504712 | MGI:3029290 | Zfp281   |
| ENSMUST00000113264.8  | 0.146504712 | MGI:1095737 | Cntn4    |
| ENSMUST00000119481.1  | 0.146504712 | MGI:2144814 | Lrfn5    |
| ENSMUST00000119581.6  | 0.146504712 | MGI:2685683 | Thsd7a   |
| ENSMUST00000121205.7  | 0.146504712 | MGI:99259   | Matk     |
| ENSMUST00000121285.7  | 0.146504712 | MGI:1888520 | Brd4     |
| ENSMUST00000126865.7  | 0.146504712 | MGI:2446296 | Sik3     |
| ENSMUST00000133298.7  | 0.146504712 | MGI:2443181 | Dlgap2   |
| ENSMUST00000140012.7  | 0.146504712 | MGI:2429955 | Pgbd5    |
| ENSMUST00000149749.2  | 0.146504712 | MGI:1918767 | Vps35l   |
| ENSMUST00000161515.7  | 0.146504712 | MGI:106580  | Cnot11   |
| ENSMUST00000162671.7  | 0.146504712 | MGI:2183747 | Fgd4     |
| ENSMUST00000163643.2  | 0.146504712 | MGI:104582  | Eps15l1  |
| ENSMUST00000169061.7  | 0.146504712 | MGI:1261425 | Drosha   |
| ENSMUST00000172132.8  | 0.146504712 | MGI:98797   | Tpi1     |
| ENSMUST00000176438.8  | 0.146504712 | MGI:1344407 | Zeb2     |
| ENSMUST00000179474.8  | 0.146504712 | MGI:1921599 | Fam160a2 |
| ENSMUST00000182222.7  | 0.146504712 | MGI:1932376 | Cacng8   |
| ENSMUST00000183703.7  | 0.146504712 | MGI:2151013 | Erc1     |
| ENSMUST00000184945.7  | 0.146504712 | MGI:2183691 | Nav2     |
| ENSMUST00000185333.1  | 0.146504712 | MGI:96663   | Kcna6    |

|                       |             |             |               |
|-----------------------|-------------|-------------|---------------|
| ENSMUST00000191602.1  | 0.146504712 | MGI:2685842 | Ajm1          |
| ENSMUST00000194598.5  | 0.146504712 | MGI:3039785 | Syngap1       |
| ENSMUST00000197928.4  | 0.146504712 | MGI:1920081 | Dhx30         |
| ENSMUST00000210369.1  | 0.146504712 | MGI:1924150 | Ssbp4         |
| ENSMUST00000235343.1  | 0.146504712 | MGI:1933754 | Nedd4l        |
| ENSMUST00000000129.13 | 0.146504712 | MGI:105917  | Fer           |
| ENSMUST00000002473.9  | 0.146504712 | MGI:1915501 | Babam1        |
| ENSMUST00000002533.14 | 0.146504712 | MGI:1929866 | Rgs20         |
| ENSMUST00000019441.8  | 0.146504712 | MGI:1915092 | Nop9          |
| ENSMUST00000028170.14 | 0.146504712 | MGI:107485  | Ralgds        |
| ENSMUST00000034234.14 | 0.146504712 | MGI:1915164 | Coq9          |
| ENSMUST00000047144.12 | 0.146504712 | MGI:2444899 | 5031439G07Rik |
| ENSMUST00000049932.11 | 0.146504712 | MGI:88494   | Creb1         |
| ENSMUST00000057110.10 | 0.146504712 | MGI:3704486 | Eif3j2        |
| ENSMUST00000065574.8  | 0.146504712 | MGI:1915884 | Tm2d3         |
| ENSMUST00000078694.12 | 0.146504712 | MGI:94860   | Ppp1r1b       |
| ENSMUST00000102514.3  | 0.146504712 | MGI:2661375 | Rtn4r1l       |
| ENSMUST00000110531.8  | 0.146504712 | MGI:3613669 | Shf           |
| ENSMUST00000113707.8  | 0.146504712 | MGI:98809   | Tpm1          |
| ENSMUST00000164375.3  | 0.146504712 | MGI:103072  | Zyx           |
| ENSMUST00000217537.1  | 0.146504712 | MGI:1914621 | Gtf3c6        |
| ENSMUST00000020145.11 | 0.146504712 | MGI:1340062 | Sgk1          |
| ENSMUST00000020188.12 | 0.146504712 | MGI:107655  | Ifngr1        |
| ENSMUST00000021413.8  | 0.146504712 | MGI:104741  | Nfkbia        |
| ENSMUST00000023365.12 | 0.146504712 | MGI:1914368 | Bfar          |
| ENSMUST00000028300.5  | 0.146504712 | MGI:1915241 | Nacc2         |
| ENSMUST00000029562.4  | 0.146504712 | MGI:87891   | Chrn2         |
| ENSMUST00000031273.8  | 0.146504712 | MGI:1921846 | Cds1          |
| ENSMUST00000032926.11 | 0.146504712 | MGI:1915992 | Tmem219       |
| ENSMUST00000033545.5  | 0.146504712 | MGI:1915040 | Rab39b        |
| ENSMUST00000033671.12 | 0.146504712 | MGI:104557  | Rps6ka3       |
| ENSMUST00000035497.4  | 0.146504712 | MGI:1916308 | Oscp1         |
| ENSMUST00000037383.12 | 0.146504712 | MGI:1916082 | Ldah          |
| ENSMUST00000040972.3  | 0.146504712 | MGI:2145443 | Utp15         |
| ENSMUST00000042121.10 | 0.146504712 | MGI:95921   | H2-DMa        |
| ENSMUST00000043336.10 | 0.146504712 | MGI:106018  | St8sia4       |
| ENSMUST00000049470.10 | 0.146504712 | MGI:1914729 | Tmem183a      |
| ENSMUST00000062289.10 | 0.146504712 | MGI:2444572 | Bend6         |
| ENSMUST00000068025.12 | 0.146504712 | MGI:2143315 | Klhl18        |

|                       |             |             |               |
|-----------------------|-------------|-------------|---------------|
| ENSMUST00000072695.12 | 0.146504712 | MGI:104636  | Tle1          |
| ENSMUST00000073787.6  | 0.146504712 | MGI:107796  | Akr7a5        |
| ENSMUST00000088922.4  | 0.146504712 | MGI:1915955 | Gtf2f2        |
| ENSMUST00000098367.4  | 0.146504712 | MGI:1928485 | Mlycd         |
| ENSMUST00000115659.5  | 0.146504712 | MGI:2447322 | Pcdha9        |
| ENSMUST00000117399.1  | 0.146504712 | MGI:97167   | Msn           |
| ENSMUST00000132032.7  | 0.146504712 | MGI:1298230 | Cnot7         |
| ENSMUST00000154256.2  | 0.146504712 | MGI:2662729 | Zfp703        |
| ENSMUST00000166968.8  | 0.146504712 | MGI:1097165 | Nrg3          |
| ENSMUST00000168292.1  | 0.146504712 | MGI:5313030 | Gm20721       |
| ENSMUST00000168828.2  | 0.146504712 | MGI:1352495 | Zfp385a       |
| ENSMUST00000176155.1  | 0.146504712 | MGI:1919435 | Dbnnd1        |
| ENSMUST00000188842.6  | 0.146504712 | MGI:99666   | Syt2          |
| ENSMUST00000210682.1  | 0.146504712 | MGI:109404  | Nup98         |
| ENSMUST00000218184.1  | 0.146504712 | MGI:1918814 | Izumo4        |
| ENSMUST00000229028.1  | 0.146504712 | MGI:98304   | St3gal1       |
| ENSMUST00000025411.8  | 0.146657476 | MGI:2442865 | Preli3a       |
| ENSMUST00000028905.9  | 0.146657476 | MGI:97512   | Pcsk2         |
| ENSMUST00000035157.9  | 0.146657476 | MGI:102964  | Srprb         |
| ENSMUST00000089726.9  | 0.146657476 | MGI:2181743 | D430041D05Rik |
| ENSMUST00000067284.9  | 0.14833267  | MGI:1859328 | Cpsf3         |
| ENSMUST00000045593.11 | 0.149746005 | MGI:2442032 | Daglb         |
| ENSMUST00000060490.10 | 0.149746005 | MGI:1347345 | Homer1        |
| ENSMUST00000166247.7  | 0.149746005 | MGI:1916348 | Tmem176b      |
| ENSMUST00000035371.8  | 0.150503808 | MGI:1927139 | Sv2a          |
| ENSMUST00000044857.3  | 0.150503808 | MGI:1913932 | Trappc5       |
| ENSMUST00000090150.10 | 0.150503808 | MGI:1196326 | Ncald         |
| ENSMUST00000032143.7  | 0.151242217 | MGI:98084   | Rpn1          |
| ENSMUST00000114897.8  | 0.151997873 | MGI:1261437 | Atp5c1        |
| ENSMUST00000058793.13 | 0.152650375 | MGI:1921076 | Poldip3       |
| ENSMUST00000015467.8  | 0.1529402   | MGI:1353474 | Slc39a1       |
| ENSMUST00000001806.9  | 0.153493975 | MGI:1918993 | Coasy         |
| ENSMUST00000019231.11 | 0.153493975 | MGI:109629  | Atp6ap1       |
| ENSMUST00000045286.8  | 0.153493975 | MGI:1915187 | Tmem59l       |
| ENSMUST00000092430.10 | 0.153493975 | MGI:107810  | Tfam          |
| ENSMUST00000143987.8  | 0.153817507 | MGI:1920150 | Ndufv2        |
| ENSMUST00000008350.15 | 0.154015838 | MGI:1914510 | Cers4         |
| ENSMUST00000024897.9  | 0.154015838 | MGI:1353561 | Vapa          |
| ENSMUST00000033241.5  | 0.154015838 | MGI:1923679 | Lhpp          |



|                       |             |             |          |
|-----------------------|-------------|-------------|----------|
| ENSMUST00000020820.1  | 0.154973749 | MGI:1333794 | Mrpl22   |
| ENSMUST00000030036.5  | 0.154973749 | MGI:1928478 | Brinp1   |
| ENSMUST00000032500.8  | 0.154973749 | MGI:3043083 | Prmt8    |
| ENSMUST00000041769.7  | 0.154973749 | MGI:107738  | Dync1li2 |
| ENSMUST00000050561.12 | 0.154973749 | MGI:1921799 | Mau2     |
| ENSMUST00000054514.5  | 0.154973749 | MGI:2669796 | Rtn4rl2  |
| ENSMUST00000066905.8  | 0.154973749 | MGI:1098266 | Chl1     |
| ENSMUST00000113476.7  | 0.154973749 | MGI:1333849 | Rasgrp2  |
| ENSMUST00000152367.7  | 0.154973749 | MGI:104592  | Myef2    |
| ENSMUST00000002121.4  | 0.157874366 | MGI:107726  | Supt6    |
| ENSMUST00000006424.7  | 0.157874366 | MGI:1915723 | Mob1b    |
| ENSMUST00000016023.8  | 0.157874366 | MGI:2442958 | Fam184b  |
| ENSMUST00000021187.11 | 0.157874366 | MGI:1917701 | Dhrs13   |
| ENSMUST00000043757.14 | 0.157874366 | MGI:1351658 | Abcf1    |
| ENSMUST00000050646.12 | 0.157874366 | MGI:1920045 | Ttc19    |
| ENSMUST00000100347.10 | 0.158682708 | MGI:97180   | Mapt     |
| ENSMUST00000025957.8  | 0.159339681 | MGI:1915144 | Fam45a   |
| ENSMUST00000033506.12 | 0.159339681 | MGI:1914661 | Wdr13    |
| ENSMUST00000031726.14 | 0.159834924 | MGI:95784   | Gnb2     |
| ENSMUST00000020238.13 | 0.160223731 | MGI:98817   | Hsp90b1  |
| ENSMUST00000044385.13 | 0.164395469 | MGI:2444615 | Sgtb     |
| ENSMUST00000061755.8  | 0.164574964 | MGI:96748   | Lamp2    |
| ENSMUST00000102960.10 | 0.164574964 | MGI:1329014 | Stam     |
| ENSMUST00000160307.8  | 0.164574964 | MGI:1916264 | Tnik     |
| ENSMUST00000014684.5  | 0.164908221 | MGI:98884   | U2af1    |
| ENSMUST00000028386.11 | 0.164908221 | MGI:1355333 | Nckap1   |
| ENSMUST00000032995.14 | 0.164908221 | MGI:99473   | Arrb1    |
| ENSMUST00000042701.12 | 0.164908221 | MGI:104991  | Mxd4     |
| ENSMUST00000063838.10 | 0.164908221 | MGI:1923520 | Fam49b   |
| ENSMUST00000098112.8  | 0.164908221 | MGI:1930018 | Dnajb5   |
| ENSMUST00000105525.11 | 0.164908221 | MGI:87971   | Ahi1     |
| ENSMUST00000107384.9  | 0.164908221 | MGI:96414   | ldh2     |
| ENSMUST00000001780.9  | 0.165740856 | MGI:87986   | Akt1     |
| ENSMUST00000010241.13 | 0.165740856 | MGI:1858330 | Nxf1     |
| ENSMUST00000012152.12 | 0.165740856 | MGI:892866  | Dgcr2    |
| ENSMUST00000019333.9  | 0.165740856 | MGI:1921565 | Rnf145   |
| ENSMUST00000024599.13 | 0.165740856 | MGI:96435   | Igf2r    |
| ENSMUST00000026439.13 | 0.165740856 | MGI:1917167 | Nabp2    |
| ENSMUST00000033783.1  | 0.165740856 | MGI:1923939 | Tceal6   |

|                       |             |             |            |
|-----------------------|-------------|-------------|------------|
| ENSMUST00000037763.10 | 0.165740856 | MGI:2448561 | Ythdc2     |
| ENSMUST00000044795.7  | 0.165740856 | MGI:2442620 | Nup133     |
| ENSMUST00000049057.4  | 0.165740856 | MGI:2448496 | Fam171a2   |
| ENSMUST00000053681.5  | 0.165740856 | MGI:2442704 | Frrs1l     |
| ENSMUST00000054636.6  | 0.165740856 | MGI:1917619 | Bag5       |
| ENSMUST00000061174.6  | 0.165740856 | MGI:2136419 | Sarm1      |
| ENSMUST00000074225.10 | 0.165740856 | MGI:1334445 | Cpne6      |
| ENSMUST00000081551.13 | 0.165740856 | MGI:1196624 | Tcea1      |
| ENSMUST00000090057.5  | 0.165740856 | MGI:2442392 | Sybu       |
| ENSMUST00000105897.9  | 0.165740856 | MGI:1935147 | Arid1a     |
| ENSMUST00000107152.8  | 0.165740856 | MGI:1333784 | Hdac5      |
| ENSMUST00000107270.8  | 0.165740856 | MGI:2442117 | Pogz       |
| ENSMUST00000111466.2  | 0.165740856 | MGI:1914695 | C1qtnf4    |
| ENSMUST00000114444.8  | 0.165740856 | MGI:1923552 | Pcnp       |
| ENSMUST00000117944.1  | 0.165740856 | MGI:1201606 | Hs3st1     |
| ENSMUST00000129411.6  | 0.165740856 | MGI:5753810 | Gm45234    |
| ENSMUST00000130216.2  | 0.165740856 | MGI:98285   | Srsf3      |
| ENSMUST00000155551.7  | 0.165740856 | MGI:2140179 | Dcaf10     |
| ENSMUST00000100484.5  | 0.16620713  | MGI:1933181 | Eif3d      |
| ENSMUST00000026624.10 | 0.167150032 | MGI:1915309 | Tm9sf2     |
| ENSMUST00000025014.9  | 0.167188016 | MGI:1915861 | Mrpl28     |
| ENSMUST00000021362.4  | 0.167298132 | MGI:1916804 | Klhdc2     |
| ENSMUST00000095797.5  | 0.168213511 | MGI:109242  | Spin1      |
| ENSMUST00000058845.8  | 0.168511748 | MGI:1917600 | Basp1      |
| ENSMUST00000150350.8  | 0.16867265  | MGI:1351455 | Rpl13a     |
| ENSMUST00000170217.7  | 0.16932876  | MGI:1346035 | Farsb      |
| ENSMUST00000022268.9  | 0.170193666 | MGI:1915513 | Pdhd       |
| ENSMUST00000032272.12 | 0.170193666 | MGI:93830   | Adipor2    |
| ENSMUST00000131728.3  | 0.170193666 | MGI:894684  | Pa2g4      |
| ENSMUST00000031038.10 | 0.170928525 | MGI:1915345 | Ociad1     |
| ENSMUST00000007131.15 | 0.170935542 | MGI:103251  | Acly       |
| ENSMUST00000020488.8  | 0.171197507 | MGI:106381  | D10Wsu102e |
| ENSMUST00000037785.13 | 0.172628176 | MGI:97282   | Ncam2      |
| ENSMUST00000072954.7  | 0.172628176 | MGI:1919085 | Lancl2     |
| ENSMUST00000072961.5  | 0.172628176 | MGI:1929215 | Vps41      |
| ENSMUST00000098048.5  | 0.172628176 | MGI:1923686 | Tufm       |
| ENSMUST00000102687.3  | 0.172628176 | MGI:1913483 | Dmap1      |
| ENSMUST00000166664.1  | 0.172628176 | MGI:5141963 | Gm20498    |
| ENSMUST00000167004.2  | 0.172628176 | MGI:2142716 | Gpat4      |

|                       |             |             |               |
|-----------------------|-------------|-------------|---------------|
| ENSMUST00000216344.1  | 0.172628176 | MGI:107877  | PrkcsH        |
| ENSMUST00000002043.9  | 0.172701578 | MGI:1914413 | Ccdc47        |
| ENSMUST00000006181.6  | 0.174165802 | MGI:104563  | Napa          |
| ENSMUST00000028768.1  | 0.174972963 | MGI:1916952 | Ndufaf1       |
| ENSMUST00000033662.8  | 0.174972963 | MGI:97532   | Pdha1         |
| ENSMUST00000065167.8  | 0.174972963 | MGI:87941   | Grk3          |
| ENSMUST00000108345.8  | 0.174972963 | MGI:1918850 | Ythdf3        |
| ENSMUST00000181173.1  | 0.174972963 | MGI:3782011 | Gm3839        |
| ENSMUST00000050027.8  | 0.175803402 | MGI:109185  | Ccn3          |
| ENSMUST00000099224.9  | 0.176154769 | MGI:88543   | Csnk2a1       |
| ENSMUST00000132846.1  | 0.177469966 | MGI:97749   | Ppia          |
| ENSMUST00000021963.4  | 0.178054367 | MGI:104728  | Caml          |
| ENSMUST00000026093.8  | 0.178054367 | MGI:1933765 | Btbd1         |
| ENSMUST00000030243.7  | 0.178054367 | MGI:1336173 | Prkaa2        |
| ENSMUST00000034464.7  | 0.178054367 | MGI:1916801 | 2310022B05Rik |
| ENSMUST00000036999.9  | 0.178054367 | MGI:1313136 | Clip2         |
| ENSMUST00000039608.8  | 0.178054367 | MGI:1918480 | Dym           |
| ENSMUST00000043059.8  | 0.178054367 | MGI:1306826 | Sema7a        |
| ENSMUST00000077853.4  | 0.178054367 | MGI:109584  | Prpf4b        |
| ENSMUST00000092295.9  | 0.178054367 | MGI:1333812 | Mbd3          |
| ENSMUST00000100206.3  | 0.178054367 | MGI:2443114 | Larp4         |
| ENSMUST00000106259.8  | 0.178054367 | MGI:95609   | Gaa           |
| ENSMUST00000114157.2  | 0.178054367 | MGI:1100492 | Nrp2          |
| ENSMUST00000179343.2  | 0.178054367 | MGI:1338779 | Purb          |
| ENSMUST00000024706.11 | 0.178138568 | MGI:1351327 | Pla2g7        |
| ENSMUST00000032220.14 | 0.178799908 | MGI:1349400 | Cops7a        |
| ENSMUST00000030455.14 | 0.179087905 | MGI:1929955 | Akr1a1        |
| ENSMUST00000021049.8  | 0.179399726 | MGI:105047  | Psmc5         |
| ENSMUST00000094179.10 | 0.182668029 | MGI:95808   | Gria1         |
| ENSMUST00000135941.7  | 0.183096892 | MGI:1276111 | Pfdn2         |
| ENSMUST00000021522.4  | 0.183846754 | MGI:1920296 | Glrx5         |
| ENSMUST00000030412.10 | 0.183846754 | MGI:1298204 | Ppt1          |
| ENSMUST00000075280.11 | 0.183846754 | MGI:1913833 | Exosc1        |
| ENSMUST00000079791.10 | 0.183846754 | MGI:88557   | Pcyt1a        |
| ENSMUST00000166984.7  | 0.183846754 | MGI:1196294 | Fubp1         |
| ENSMUST00000100162.4  | 0.184888875 | MGI:1929063 | Copz1         |
| ENSMUST00000006137.8  | 0.185811246 | MGI:1915265 | Trap1         |
| ENSMUST00000021479.5  | 0.186612594 | MGI:1891654 | Actr10        |
| ENSMUST00000029719.13 | 0.186612594 | MGI:1918012 | Dclk2         |

|                       |             |             |               |
|-----------------------|-------------|-------------|---------------|
| ENSMUST00000049460.10 | 0.186612594 | MGI:95832   | Grn           |
| ENSMUST00000088429.7  | 0.186612594 | MGI:1347353 | Atp2b3        |
| ENSMUST00000102488.7  | 0.186612594 | MGI:2667185 | Myo18a        |
| ENSMUST00000114871.1  | 0.186612594 | MGI:1354959 | Hs6st2        |
| ENSMUST00000143219.7  | 0.186612594 | MGI:99887   | Pitpna        |
| ENSMUST00000162031.7  | 0.186612594 | MGI:2138153 | Txndc9        |
| ENSMUST00000192168.1  | 0.186612594 | MGI:1298371 | Pcdha5        |
| ENSMUST00000205658.1  | 0.186612594 | MGI:2387643 | B9d2          |
| ENSMUST00000227843.1  | 0.186612594 | MGI:1914679 | Nudcd1        |
| ENSMUST00000022849.6  | 0.186799935 | MGI:106314  | Tars          |
| ENSMUST00000055966.12 | 0.188050593 | MGI:95615   | Gabra3        |
| ENSMUST00000017430.11 | 0.189172155 | MGI:1914451 | Glod4         |
| ENSMUST00000022147.14 | 0.191072101 | MGI:109257  | Smn1          |
| ENSMUST00000023502.5  | 0.191072101 | MGI:1916400 | Snx4          |
| ENSMUST00000102880.4  | 0.191072101 | MGI:107172  | Ppp3r1        |
| ENSMUST00000005067.5  | 0.191698329 | MGI:1098703 | Sgta          |
| ENSMUST00000028295.8  | 0.192906232 | MGI:106559  | Dnlz          |
| ENSMUST00000032825.13 | 0.192906232 | MGI:102768  | Mfge8         |
| ENSMUST00000064234.6  | 0.192906232 | MGI:98931   | Ezr           |
| ENSMUST00000097886.3  | 0.192906232 | MGI:3609248 | 5730409E04Rik |
| ENSMUST00000099466.9  | 0.192906232 | MGI:700014  | Sorbs1        |
| ENSMUST00000031420.10 | 0.194653243 | MGI:1289326 | Gpn3          |
| ENSMUST00000045986.7  | 0.194653243 | MGI:103078  | Spr           |
| ENSMUST00000025918.8  | 0.194655866 | MGI:109130  | Stip1         |
| ENSMUST00000027467.10 | 0.194997208 | MGI:101780  | Serpine2      |
| ENSMUST00000193560.5  | 0.197118709 | MGI:1923750 | Ip6k2         |
| ENSMUST00000023554.8  | 0.197729145 | MGI:2387188 | Slc49a4       |
| ENSMUST00000042561.13 | 0.197729145 | MGI:2442746 | Slc43a2       |
| ENSMUST00000063577.9  | 0.197729145 | MGI:1927231 | Zmym3         |
| ENSMUST00000075954.8  | 0.197729145 | MGI:109577  | Taf1b         |
| ENSMUST00000097694.10 | 0.197729145 | MGI:2388278 | Retreg2       |
| ENSMUST00000100399.10 | 0.197729145 | MGI:95606   | Xrcc6         |
| ENSMUST00000023572.14 | 0.198774164 | MGI:1201679 | Cxadr         |
| ENSMUST00000033804.4  | 0.199572155 | MGI:1914245 | Zcchc18       |
| ENSMUST00000000348.14 | 0.199602556 | MGI:1913618 | Rtca          |
| ENSMUST00000165790.8  | 0.199602556 | MGI:1337995 | Klhl22        |
| ENSMUST00000170303.1  | 0.199965802 | MGI:5141855 | Gm20390       |
| ENSMUST00000001419.9  | 0.201542946 | MGI:1913742 | Zmat2         |
| ENSMUST00000028139.10 | 0.201542946 | MGI:1916225 | Med27         |

|                       |             |             |          |
|-----------------------|-------------|-------------|----------|
| ENSMUST00000029297.5  | 0.201542946 | MGI:1347355 | Slc7a11  |
| ENSMUST00000053020.7  | 0.201542946 | MGI:3643092 | Neurl1b  |
| ENSMUST00000061279.9  | 0.201542946 | MGI:1935228 | Pcdhga11 |
| ENSMUST00000030841.9  | 0.201639851 | MGI:1196453 | Klh7     |
| ENSMUST00000066601.12 | 0.201639851 | MGI:108030  | Hyou1    |
| ENSMUST00000031402.11 | 0.201710702 | MGI:107943  | Cct6a    |
| ENSMUST00000034822.11 | 0.20295812  | MGI:2385656 | Acsbg1   |
| ENSMUST00000045633.5  | 0.204634361 | MGI:106181  | Mybbp1a  |
| ENSMUST00000046735.10 | 0.204634361 | MGI:1096570 | Tex264   |
| ENSMUST00000055758.15 | 0.204634361 | MGI:1861100 | Ubr3     |
| ENSMUST00000093157.12 | 0.205070225 | MGI:101919  | Ap1g1    |
| ENSMUST00000071230.7  | 0.206527809 | MGI:95299   | Eif2s1   |
| ENSMUST00000107851.9  | 0.207041051 | MGI:894297  | Clta     |
| ENSMUST00000061508.7  | 0.207190882 | MGI:2153740 | Zfp358   |
| ENSMUST00000075316.9  | 0.207190882 | MGI:95809   | Gria2    |
| ENSMUST00000003521.9  | 0.208018621 | MGI:1351329 | Rps11    |
| ENSMUST00000044681.6  | 0.208095738 | MGI:1929501 | Arl6ip5  |
| ENSMUST00000167962.1  | 0.208308229 | MGI:894284  | Rab12    |
| ENSMUST00000005830.14 | 0.209340285 | MGI:1915433 | Bcas2    |
| ENSMUST00000032425.6  | 0.209340285 | MGI:1913337 | Emc3     |
| ENSMUST00000053705.7  | 0.209340285 | MGI:1919680 | B4gat1   |
| ENSMUST00000117786.7  | 0.210139255 | MGI:1351660 | Csnk1e   |
| ENSMUST00000172450.2  | 0.211172648 | MGI:108415  | Pafah1b2 |
| ENSMUST00000082090.14 | 0.212753299 | MGI:1100869 | Ap3b2    |
| ENSMUST00000164181.1  | 0.213438934 | MGI:109318  | Myl6     |
| ENSMUST00000138703.7  | 0.214130773 | MGI:1891833 | Pfkp     |
| ENSMUST00000069747.5  | 0.215341879 | MGI:1920274 | Emc7     |
| ENSMUST00000039720.10 | 0.216415041 | MGI:3038613 | Rragb    |
| ENSMUST00000042726.13 | 0.216415041 | MGI:1915285 | Rbm42    |
| ENSMUST00000004683.12 | 0.216903047 | MGI:1890498 | Mcoln1   |
| ENSMUST00000006838.15 | 0.216903047 | MGI:1915851 | Qars     |
| ENSMUST00000018466.3  | 0.216903047 | MGI:1914395 | Tomm34   |
| ENSMUST00000019135.13 | 0.216903047 | MGI:2384159 | Gga3     |
| ENSMUST00000020349.6  | 0.216903047 | MGI:1346052 | Apc2     |
| ENSMUST00000026013.5  | 0.216903047 | MGI:96915   | Maoa     |
| ENSMUST00000027271.8  | 0.216903047 | MGI:104848  | Inpp1    |
| ENSMUST00000028554.3  | 0.216903047 | MGI:2138993 | Lpcat4   |
| ENSMUST00000030143.12 | 0.216903047 | MGI:1916176 | Ubp2     |
| ENSMUST00000030691.16 | 0.216903047 | MGI:1349390 | Pclo     |

|                       |             |             |           |
|-----------------------|-------------|-------------|-----------|
| ENSMUST00000033257.14 | 0.216903047 | MGI:1919346 | Eef1akmt2 |
| ENSMUST00000034017.8  | 0.216903047 | MGI:1924363 | Klh2      |
| ENSMUST00000034328.12 | 0.216903047 | MGI:1918135 | Ints10    |
| ENSMUST00000037739.7  | 0.216903047 | MGI:1353651 | Gnl3      |
| ENSMUST00000041391.4  | 0.216903047 | MGI:1920978 | Psd       |
| ENSMUST00000054591.9  | 0.216903047 | MGI:2139347 | Thns1     |
| ENSMUST00000066778.5  | 0.216903047 | MGI:1934031 | Pi4k2a    |
| ENSMUST00000070735.9  | 0.216903047 | MGI:95623   | Gabrg2    |
| ENSMUST00000082088.9  | 0.216903047 | MGI:3045303 | Mam1d1    |
| ENSMUST00000090938.10 | 0.216903047 | MGI:1929538 | Dap3      |
| ENSMUST00000091252.4  | 0.216903047 | MGI:2139207 | Sec16a    |
| ENSMUST00000099678.4  | 0.216903047 | MGI:1341907 | Fjx1      |
| ENSMUST00000100322.3  | 0.216903047 | MGI:2679446 | Slitrk1   |
| ENSMUST00000101059.3  | 0.216903047 | MGI:2444810 | Prrt3     |
| ENSMUST00000109221.8  | 0.216903047 | MGI:1927169 | B4gal5    |
| ENSMUST00000109399.8  | 0.216903047 | MGI:2681523 | Tnpo1     |
| ENSMUST00000109424.3  | 0.216903047 | MGI:98962   | Wnt7b     |
| ENSMUST00000109670.7  | 0.216903047 | MGI:1929915 | Ncoa6     |
| ENSMUST00000109962.3  | 0.216903047 | MGI:105372  | Sstr4     |
| ENSMUST00000110030.9  | 0.216903047 | MGI:1916428 | Snx5      |
| ENSMUST00000112683.8  | 0.216903047 | MGI:1916749 | Tsr2      |
| ENSMUST00000113409.7  | 0.216903047 | MGI:3045342 | Zfp711    |
| ENSMUST00000114472.7  | 0.216903047 | MGI:1347357 | Pnck      |
| ENSMUST00000139560.7  | 0.216903047 | MGI:1920037 | Ndc1      |
| ENSMUST00000159855.7  | 0.216903047 | MGI:2179432 | Mycbp2    |
| ENSMUST00000166241.1  | 0.216903047 | MGI:2679449 | Slitrk2   |
| ENSMUST00000170578.2  | 0.216903047 | MGI:1916049 | Rgmb      |
| ENSMUST00000053811.9  | 0.218389616 | MGI:1926170 | Dlst      |
| ENSMUST00000005234.12 | 0.219637503 | MGI:1337100 | Wdr1      |
| ENSMUST00000005749.5  | 0.220263339 | MGI:109345  | Ctr9      |
| ENSMUST00000016901.4  | 0.220263339 | MGI:3039573 | Ttll12    |
| ENSMUST00000017576.10 | 0.220263339 | MGI:106368  | Rbfox3    |
| ENSMUST00000021670.14 | 0.220263339 | MGI:1926195 | Ylpm1     |
| ENSMUST00000027929.9  | 0.220263339 | MGI:2664902 | Mark1     |
| ENSMUST00000032570.13 | 0.220263339 | MGI:94907   | Dmwd      |
| ENSMUST00000039173.12 | 0.220263339 | MGI:1922832 | Relch     |
| ENSMUST00000046765.9  | 0.220263339 | MGI:109322  | Kcnk1     |
| ENSMUST00000059354.14 | 0.220263339 | MGI:1195268 | Sigmar1   |
| ENSMUST00000064110.13 | 0.220263339 | MGI:109446  | Doc2a     |

|                       |             |             |               |
|-----------------------|-------------|-------------|---------------|
| ENSMUST00000067925.7  | 0.220263339 | MGI:96157   | Hmgb2         |
| ENSMUST00000069637.14 | 0.220263339 | MGI:1890393 | Zfp277        |
| ENSMUST00000085724.4  | 0.220263339 | MGI:2138351 | Susd4         |
| ENSMUST00000085912.9  | 0.220263339 | MGI:2154090 | Igsf8         |
| ENSMUST00000091554.5  | 0.220263339 | MGI:3588199 | Cntnap3       |
| ENSMUST00000105372.7  | 0.220263339 | MGI:104767  | Gpx4          |
| ENSMUST00000108594.7  | 0.220263339 | MGI:1859017 | Elp5          |
| ENSMUST00000109462.7  | 0.220263339 | MGI:97615   | Plcg1         |
| ENSMUST00000109726.7  | 0.220263339 | MGI:2150037 | Mta1          |
| ENSMUST00000114321.1  | 0.220263339 | MGI:2384811 | Kbtbd2        |
| ENSMUST00000149964.8  | 0.220263339 | MGI:1309503 | Kcnq2         |
| ENSMUST00000150068.1  | 0.220263339 | MGI:5141983 | Gm20518       |
| ENSMUST00000166791.7  | 0.220263339 | MGI:1917483 | Cd2bp2        |
| ENSMUST00000099396.2  | 0.221480177 | MGI:3513266 | Nt5dc3        |
| ENSMUST00000036380.13 | 0.221622496 | MGI:1890510 | Atp6v0b       |
| ENSMUST00000005487.11 | 0.222529666 | MGI:1929468 | Txn2          |
| ENSMUST00000027114.5  | 0.222529666 | MGI:1915365 | Maip1         |
| ENSMUST00000030628.14 | 0.222529666 | MGI:1913396 | Maco1         |
| ENSMUST00000031434.7  | 0.222529666 | MGI:2153340 | Rnf34         |
| ENSMUST00000039442.11 | 0.222529666 | MGI:1914039 | Alg14         |
| ENSMUST00000042942.9  | 0.222529666 | MGI:2450915 | Sec23ip       |
| ENSMUST00000063663.5  | 0.222529666 | MGI:2389490 | B3gat2        |
| ENSMUST00000099761.9  | 0.222529666 | MGI:1261760 | Lsamp         |
| ENSMUST00000103027.9  | 0.222529666 | MGI:3606200 | Mgat5b        |
| ENSMUST00000106052.1  | 0.222529666 | MGI:3039601 | Zfp941        |
| ENSMUST00000109532.8  | 0.222529666 | MGI:1918925 | 0610010F05Rik |
| ENSMUST00000114792.7  | 0.222529666 | MGI:104670  | Fkbp5         |
| ENSMUST00000117551.3  | 0.222529666 | MGI:1197013 | Rasa3         |
| ENSMUST00000234266.1  | 0.222863284 | MGI:1889642 | Elp2          |
| ENSMUST00000110093.8  | 0.223130968 | MGI:97843   | Rab3a         |
| ENSMUST00000042012.6  | 0.224161465 | MGI:1289341 | Sf3b3         |
| ENSMUST00000062181.8  | 0.224161465 | MGI:1347092 | Zfp146        |
| ENSMUST00000068110.9  | 0.224161465 | MGI:1860487 | Pcdh7         |
| ENSMUST00000076364.5  | 0.224161465 | MGI:3704336 | Rpl10-ps3     |
| ENSMUST00000079439.9  | 0.224161465 | MGI:2443589 | Tmem91        |
| ENSMUST00000103221.9  | 0.224161465 | MGI:1928394 | Mtor          |
| ENSMUST00000159899.7  | 0.224161465 | MGI:1913863 | Pigk          |
| ENSMUST00000186465.6  | 0.224161465 | MGI:1309481 | Trip12        |
| ENSMUST00000033313.2  | 0.224552323 | MGI:1917745 | Atp6ap2       |

|                       |             |             |           |
|-----------------------|-------------|-------------|-----------|
| ENSMUST00000023357.13 | 0.225392497 | MGI:1913336 | Fopnl     |
| ENSMUST00000024802.9  | 0.225392497 | MGI:1916066 | Ppil1     |
| ENSMUST00000025864.10 | 0.225392497 | MGI:1915459 | Rnaseh2c  |
| ENSMUST00000030882.11 | 0.225392497 | MGI:1920328 | Pmpcb     |
| ENSMUST00000172361.7  | 0.225392497 | MGI:101947  | Hnrnpd    |
| ENSMUST00000002133.8  | 0.226354255 | MGI:108019  | Sdf2      |
| ENSMUST00000019920.12 | 0.226354255 | MGI:2443223 | Clvs2     |
| ENSMUST00000025019.8  | 0.226354255 | MGI:108430  | Arhgdig   |
| ENSMUST00000043237.13 | 0.226354255 | MGI:1915978 | Trp53inp2 |
| ENSMUST00000055438.4  | 0.226354255 | MGI:2444096 | Ppm1e     |
| ENSMUST00000074233.11 | 0.226354255 | MGI:2661187 | Synm      |
| ENSMUST00000110142.7  | 0.226354255 | MGI:104898  | Gpcpd1    |
| ENSMUST00000012259.8  | 0.22712638  | MGI:2137379 | Med15     |
| ENSMUST00000026665.7  | 0.22712638  | MGI:1195985 | Cbx4      |
| ENSMUST00000028517.12 | 0.22712638  | MGI:1914309 | Ola1      |
| ENSMUST00000169390.7  | 0.22712638  | MGI:1915120 | Enoph1    |
| ENSMUST00000219037.1  | 0.22712638  | MGI:1928477 | Cnpy2     |
| ENSMUST00000195015.5  | 0.227759926 | MGI:1921173 | Tmco1     |
| ENSMUST00000075641.9  | 0.228289128 | MGI:106184  | Npm1      |
| ENSMUST00000213683.1  | 0.228289128 | MGI:1925112 | Thyn1     |
| ENSMUST00000020081.10 | 0.228768239 | MGI:1289227 | Zwint     |
| ENSMUST00000098574.8  | 0.229338672 | MGI:2385189 | Rap1gds1  |
| ENSMUST00000022204.15 | 0.230799317 | MGI:108390  | Kif2a     |
| ENSMUST00000025961.6  | 0.230952271 | MGI:88034   | Prdx3     |
| ENSMUST00000166468.1  | 0.230952271 | MGI:103310  | Ptprk     |
| ENSMUST00000073791.9  | 0.231220167 | MGI:1918929 | Atp5h     |
| ENSMUST00000019514.9  | 0.231381291 | MGI:103249  | Calm3     |
| ENSMUST00000003117.14 | 0.231447075 | MGI:102776  | Ap1m1     |
| ENSMUST00000022380.8  | 0.231886841 | MGI:1914339 | Psmc6     |
| ENSMUST00000064762.5  | 0.233220393 | MGI:1306778 | Map1b     |
| ENSMUST00000076694.12 | 0.235477772 | MGI:1353498 | Slc25a3   |
| ENSMUST00000163507.7  | 0.239192295 | MGI:97548   | Pfkm      |
| ENSMUST00000097014.6  | 0.240041539 | MGI:98869   | Tuba1a    |
| ENSMUST00000115817.2  | 0.24006362  | MGI:1913898 | Tpgs2     |
| ENSMUST00000000619.7  | 0.240503433 | MGI:104571  | Clcn4     |
| ENSMUST00000045441.7  | 0.240503433 | MGI:97828   | Pygb      |
| ENSMUST00000023694.10 | 0.24195722  | MGI:1915251 | Cfap298   |
| ENSMUST00000168264.1  | 0.242332146 | MGI:1914666 | Armcx2    |
| ENSMUST00000066587.11 | 0.242837421 | MGI:1330812 | Acox1     |



|                       |             |             |          |
|-----------------------|-------------|-------------|----------|
| ENSMUST00000117611.7  | 0.243859782 | MGI:1333782 | Pld3     |
| ENSMUST00000019939.11 | 0.244280152 | MGI:1860188 | Snx3     |
| ENSMUST00000102590.10 | 0.244869815 | MGI:1100836 | Kpna6    |
| ENSMUST00000004173.11 | 0.244921987 | MGI:1913876 | Cdip1    |
| ENSMUST00000135884.7  | 0.245156163 | MGI:97355   | Nme1     |
| ENSMUST00000023312.13 | 0.24565099  | MGI:1313266 | Alcam    |
| ENSMUST00000043211.6  | 0.24648621  | MGI:2684847 | Coq10a   |
| ENSMUST00000025713.11 | 0.247452686 | MGI:1920416 | Tm7sf2   |
| ENSMUST00000043716.8  | 0.247452686 | MGI:1914486 | Cinp     |
| ENSMUST00000097911.8  | 0.247452686 | MGI:2446210 | Kdm4a    |
| ENSMUST00000020537.8  | 0.248531873 | MGI:1202070 | Nsg2     |
| ENSMUST00000030192.4  | 0.248583999 | MGI:1916167 | Hint2    |
| ENSMUST00000075895.8  | 0.248583999 | MGI:1334458 | Pex19    |
| ENSMUST00000004494.15 | 0.24992625  | MGI:107158  | Sin3b    |
| ENSMUST00000055294.3  | 0.24992625  | MGI:1344367 | Grem2    |
| ENSMUST00000058994.5  | 0.24992625  | MGI:2443503 | Tram1l1  |
| ENSMUST00000212824.1  | 0.24992625  | MGI:1919055 | Nup93    |
| ENSMUST00000034203.16 | 0.251544501 | MGI:2142808 | Cog4     |
| ENSMUST00000098845.9  | 0.251544501 | MGI:1333763 | Epn1     |
| ENSMUST00000111080.7  | 0.251822003 | MGI:1098244 | Ap1s1    |
| ENSMUST00000079644.12 | 0.253356489 | MGI:99146   | Ybx1     |
| ENSMUST00000080537.13 | 0.253356489 | MGI:97845   | Rac1     |
| ENSMUST00000051839.8  | 0.253533636 | MGI:1920177 | Hepacam  |
| ENSMUST00000084238.4  | 0.253533636 | MGI:3527792 | Zdhhc18  |
| ENSMUST00000091299.7  | 0.253533636 | MGI:102956  | Cdk7     |
| ENSMUST00000111961.7  | 0.253533636 | MGI:1917171 | Hnrnpa3  |
| ENSMUST00000017572.13 | 0.254338454 | MGI:1916327 | Psmc11   |
| ENSMUST00000022293.13 | 0.2553821   | MGI:106915  | Vdac2    |
| ENSMUST00000008826.13 | 0.256037666 | MGI:105943  | Rpl10    |
| ENSMUST00000038608.13 | 0.256037666 | MGI:1924832 | Mboat7   |
| ENSMUST00000060481.8  | 0.256037666 | MGI:2444462 | Dcaf12l1 |
| ENSMUST00000077340.13 | 0.256037666 | MGI:2384902 | Rnpep    |
| ENSMUST00000093995.9  | 0.256037666 | MGI:104745  | Sez6     |
| ENSMUST00000204059.2  | 0.256037666 | MGI:87919   | Add2     |
| ENSMUST00000057934.9  | 0.256812083 | MGI:1914105 | Tcf25    |
| ENSMUST00000002808.6  | 0.257831161 | MGI:1344375 | Prkra    |
| ENSMUST00000048967.8  | 0.258590989 | MGI:101932  | Cpe      |
| ENSMUST00000102746.10 | 0.259279564 | MGI:1858313 | Uba2     |
| ENSMUST00000001950.11 | 0.259286241 | MGI:1891808 | Tollip   |

|                       |             |             |         |
|-----------------------|-------------|-------------|---------|
| ENSMUST00000010248.3  | 0.259286241 | MGI:1914086 | Tmem223 |
| ENSMUST00000022718.10 | 0.259286241 | MGI:102720  | Ednrb   |
| ENSMUST00000031032.10 | 0.259286241 | MGI:106065  | Ppm1g   |
| ENSMUST00000054351.5  | 0.259286241 | MGI:1915419 | Ndnf    |
| ENSMUST00000068892.14 | 0.259286241 | MGI:1344416 | Ash2l   |
| ENSMUST00000072837.6  | 0.259286241 | MGI:1347488 | Foxk1   |
| ENSMUST00000079423.6  | 0.259286241 | MGI:1916202 | Fam57b  |
| ENSMUST00000125172.7  | 0.259286241 | MGI:97572   | Phb     |
| ENSMUST00000001825.8  | 0.260287647 | MGI:1914167 | Chordc1 |
| ENSMUST00000009789.14 | 0.260920125 | MGI:97463   | P4ha1   |
| ENSMUST00000074694.6  | 0.260920125 | MGI:95771   | Gnai1   |
| ENSMUST00000001079.14 | 0.263669439 | MGI:2139764 | Sec24b  |
| ENSMUST00000027285.12 | 0.263669439 | MGI:1914637 | Unc50   |
| ENSMUST00000037182.13 | 0.263669439 | MGI:2443554 | Hook3   |
| ENSMUST00000041640.4  | 0.263669439 | MGI:2144755 | Ankmy2  |
| ENSMUST00000044783.13 | 0.263669439 | MGI:2384784 | Eif4g1  |
| ENSMUST00000045218.8  | 0.263669439 | MGI:1277958 | Pcm1    |
| ENSMUST00000046389.4  | 0.263669439 | MGI:2387367 | Rbm45   |
| ENSMUST00000046575.16 | 0.263669439 | MGI:1933946 | Ptov1   |
| ENSMUST00000056433.6  | 0.263669439 | MGI:2139054 | Gpr107  |
| ENSMUST00000057442.7  | 0.263669439 | MGI:1915453 | Diras2  |
| ENSMUST00000098548.7  | 0.263669439 | MGI:98247   | Scn1b   |
| ENSMUST00000106343.2  | 0.263669439 | MGI:2141881 | Ino80e  |
| ENSMUST00000120613.8  | 0.263669439 | MGI:107689  | Kif3a   |
| ENSMUST00000193734.5  | 0.263669439 | MGI:2441730 | Tbl1xr1 |
| ENSMUST00000200169.5  | 0.263669439 | MGI:1915022 | Chd8    |
| ENSMUST00000206720.1  | 0.263669439 | MGI:88279   | Cbl     |
| ENSMUST00000034866.8  | 0.264937487 | MGI:106092  | Etfa    |
| ENSMUST00000043313.14 | 0.264937487 | MGI:2444155 | Nmnat2  |
| ENSMUST00000014065.15 | 0.265678368 | MGI:1923936 | Clip3   |
| ENSMUST00000015829.14 | 0.266848453 | MGI:1914135 | Acadsb  |
| ENSMUST00000028251.9  | 0.267435746 | MGI:1915139 | Rbm18   |
| ENSMUST00000040440.6  | 0.267561104 | MGI:103250  | Calm2   |
| ENSMUST00000021684.5  | 0.268577371 | MGI:1341877 | Cyp46a1 |
| ENSMUST00000080723.10 | 0.268577371 | MGI:1289308 | Tax1bp1 |
| ENSMUST00000000449.8  | 0.269907498 | MGI:1914277 | Mkrn2   |
| ENSMUST00000020634.13 | 0.269907498 | MGI:1346862 | Mapk9   |
| ENSMUST00000027706.3  | 0.269907498 | MGI:106037  | Lrrn2   |
| ENSMUST00000028880.9  | 0.269907498 | MGI:108392  | Slc20a1 |

|                       |             |             |           |
|-----------------------|-------------|-------------|-----------|
| ENSMUST00000031388.12 | 0.269907498 | MGI:1924823 | Vps33a    |
| ENSMUST00000033283.9  | 0.269907498 | MGI:98180   | Rrm1      |
| ENSMUST00000034703.14 | 0.269907498 | MGI:1913208 | Carm1     |
| ENSMUST00000035166.11 | 0.269907498 | MGI:1913913 | Uba5      |
| ENSMUST00000042147.5  | 0.269907498 | MGI:2140843 | Noc4l     |
| ENSMUST00000048116.14 | 0.269907498 | MGI:88117   | Slc7a1    |
| ENSMUST00000049506.7  | 0.269907498 | MGI:98885   | Zrsr1     |
| ENSMUST00000052204.5  | 0.269907498 | MGI:2442058 | Nipa1     |
| ENSMUST00000059571.6  | 0.269907498 | MGI:2136757 | Pcdhb19   |
| ENSMUST00000075269.9  | 0.269907498 | MGI:2444672 | Madd      |
| ENSMUST00000076264.7  | 0.269907498 | MGI:1917345 | Zfp512    |
| ENSMUST00000079496.8  | 0.269907498 | MGI:1925141 | Ube2s     |
| ENSMUST00000114641.7  | 0.269907498 | MGI:1914047 | Cntnap2   |
| ENSMUST00000122912.7  | 0.269907498 | MGI:1925021 | Csrnp3    |
| ENSMUST00000144326.3  | 0.269907498 | MGI:1928741 | Ranbp9    |
| ENSMUST00000171751.9  | 0.269907498 | MGI:1933973 | Rbfox2    |
| ENSMUST00000239099.1  | 0.269907498 | MGI:1915293 | Eef1akmt1 |
| ENSMUST00000009256.3  | 0.270375845 | MGI:2136959 | Bcl2l13   |
| ENSMUST00000033450.2  | 0.270375845 | MGI:104902  | Gpc4      |
| ENSMUST00000044009.13 | 0.270375845 | MGI:2442190 | Camk1d    |
| ENSMUST00000040270.5  | 0.270499565 | MGI:1858964 | Actr1a    |
| ENSMUST00000028619.4  | 0.272106119 | MGI:1926967 | Hsd17b12  |
| ENSMUST00000028921.5  | 0.272649363 | MGI:894687  | Xrn2      |
| ENSMUST00000103199.8  | 0.272649363 | MGI:98342   | Snrpb     |
| ENSMUST00000071134.3  | 0.272979081 | MGI:107813  | Tubb3     |
| ENSMUST00000053880.12 | 0.273886375 | MGI:95821   | Grin2b    |
| ENSMUST00000061875.7  | 0.273886375 | MGI:1289282 | Zfp622    |
| ENSMUST00000209440.1  | 0.273886375 | MGI:1933134 | Tusc3     |
| ENSMUST00000156898.4  | 0.274902912 | MGI:1915339 | Arpc4     |
| ENSMUST00000031029.14 | 0.275069739 | MGI:2387801 | Snx17     |
| ENSMUST00000027626.12 | 0.275637828 | MGI:1915199 | Nifk      |
| ENSMUST00000045855.8  | 0.275637828 | MGI:1333880 | Hebp1     |
| ENSMUST00000068242.8  | 0.276191014 | MGI:1918325 | Rimklb    |
| ENSMUST00000072727.6  | 0.277662449 | MGI:1316687 | Nap1l4    |
| ENSMUST00000006911.11 | 0.27781521  | MGI:88357   | Cdk4      |
| ENSMUST00000034796.13 | 0.278151196 | MGI:1933331 | Elov14    |
| ENSMUST00000071852.9  | 0.278151196 | MGI:1914197 | Commd7    |
| ENSMUST00000079601.12 | 0.278151196 | MGI:1096867 | Etv5      |
| ENSMUST00000080511.2  | 0.279306815 | MGI:1861461 | H1f5      |

|                       |            |             |          |
|-----------------------|------------|-------------|----------|
| ENSMUST0000000201.6   | 0.27949392 | MGI:2444306 | Nalcn    |
| ENSMUST00000014499.9  | 0.27949392 | MGI:103097  | Anapc1   |
| ENSMUST00000021048.6  | 0.27949392 | MGI:1860295 | Ftsj3    |
| ENSMUST00000022567.8  | 0.27949392 | MGI:1338890 | Cacna2d3 |
| ENSMUST00000023849.14 | 0.27949392 | MGI:109382  | Noct     |
| ENSMUST00000025178.16 | 0.27949392 | MGI:1330304 | Vps52    |
| ENSMUST00000025846.15 | 0.27949392 | MGI:1921807 | Ppp6r3   |
| ENSMUST00000026360.8  | 0.27949392 | MGI:1338035 | Itgb8    |
| ENSMUST00000027760.13 | 0.27949392 | MGI:107484  | Rgl1     |
| ENSMUST00000029303.12 | 0.27949392 | MGI:1922088 | Naa15    |
| ENSMUST00000030757.9  | 0.27949392 | MGI:1924992 | Fbxo42   |
| ENSMUST00000035116.11 | 0.27949392 | MGI:1914154 | Pccb     |
| ENSMUST00000035208.13 | 0.27949392 | MGI:1277955 | Bsn      |
| ENSMUST00000036972.13 | 0.27949392 | MGI:1914669 | Armh4    |
| ENSMUST00000038091.7  | 0.27949392 | MGI:2384788 | Sde2     |
| ENSMUST00000043707.6  | 0.27949392 | MGI:1915612 | Rhbdd2   |
| ENSMUST00000045942.8  | 0.27949392 | MGI:95387   | Emx1     |
| ENSMUST00000046386.4  | 0.27949392 | MGI:2159407 | Zcchc14  |
| ENSMUST00000049424.10 | 0.27949392 | MGI:2147427 | Wdr74    |
| ENSMUST00000055993.12 | 0.27949392 | MGI:2443887 | Ric3     |
| ENSMUST00000056635.12 | 0.27949392 | MGI:1924705 | Rlf      |
| ENSMUST00000058914.9  | 0.27949392 | MGI:1095409 | Tuba1c   |
| ENSMUST00000064477.13 | 0.27949392 | MGI:107231  | Dlg1     |
| ENSMUST00000065080.9  | 0.27949392 | MGI:1919014 | C2cd2l   |
| ENSMUST00000065297.5  | 0.27949392 | MGI:3609241 | Lonrf1   |
| ENSMUST00000065977.10 | 0.27949392 | MGI:1201386 | Nrd1     |
| ENSMUST00000066432.11 | 0.27949392 | MGI:98249   | Scn3a    |
| ENSMUST00000068714.6  | 0.27949392 | MGI:98354   | Sos1     |
| ENSMUST00000071370.6  | 0.27949392 | MGI:2684924 | Pcdh17   |
| ENSMUST00000071500.12 | 0.27949392 | MGI:94921   | Dpp6     |
| ENSMUST00000072312.11 | 0.27949392 | MGI:1919857 | Usp13    |
| ENSMUST00000089217.10 | 0.27949392 | MGI:98890   | Uba1     |
| ENSMUST00000089317.11 | 0.27949392 | MGI:1203522 | Magi1    |
| ENSMUST00000091014.9  | 0.27949392 | MGI:2442208 | Map9     |
| ENSMUST00000094463.4  | 0.27949392 | MGI:1261813 | Mn1      |
| ENSMUST00000095228.3  | 0.27949392 | MGI:2142433 | Samd1    |
| ENSMUST00000100013.8  | 0.27949392 | MGI:2685387 | Atp13a3  |
| ENSMUST00000105840.7  | 0.27949392 | MGI:2158502 | Usp48    |
| ENSMUST00000106908.8  | 0.27949392 | MGI:99557   | Pde4b    |

|                       |            |             |               |
|-----------------------|------------|-------------|---------------|
| ENSMUST00000107975.7  | 0.27949392 | MGI:2140712 | Phf24         |
| ENSMUST00000114020.9  | 0.27949392 | MGI:2684957 | Rexo4         |
| ENSMUST00000118009.1  | 0.27949392 | MGI:2682306 | Naf1          |
| ENSMUST00000118927.7  | 0.27949392 | MGI:1919227 | Zdhhc13       |
| ENSMUST00000160882.7  | 0.27949392 | MGI:104634  | Tle3          |
| ENSMUST00000161137.7  | 0.27949392 | MGI:1928396 | Pdcd10        |
| ENSMUST00000161203.7  | 0.27949392 | MGI:2444451 | Rnf214        |
| ENSMUST00000161804.7  | 0.27949392 | MGI:1919847 | Auts2         |
| ENSMUST00000163347.7  | 0.27949392 | MGI:2444817 | C530008M17Rik |
| ENSMUST00000166232.3  | 0.27949392 | MGI:108091  | Bcar1         |
| ENSMUST00000167182.7  | 0.27949392 | MGI:2138741 | Hnrnpf        |
| ENSMUST00000180430.1  | 0.27949392 | MGI:3610315 | Ksr2          |
| ENSMUST00000181969.7  | 0.27949392 | MGI:1923523 | Ndfip2        |
| ENSMUST00000200393.4  | 0.27949392 | MGI:1915760 | Ints1         |
| ENSMUST00000211140.1  | 0.27949392 | MGI:97813   | Ptpre         |
| ENSMUST00000233427.1  | 0.27949392 | MGI:1343877 | Rpl10a        |
| ENSMUST00000235822.1  | 0.27949392 | MGI:3036282 | Zfp532        |
| ENSMUST00000002487.14 | 0.27949392 | MGI:88190   | Braf          |
| ENSMUST00000004910.11 | 0.27949392 | MGI:2145118 | Eif2b2        |
| ENSMUST00000022585.4  | 0.27949392 | MGI:1914717 | Gpalpp1       |
| ENSMUST00000026225.14 | 0.27949392 | MGI:1347047 | Sema4g        |
| ENSMUST00000030399.6  | 0.27949392 | MGI:1858751 | Rragc         |
| ENSMUST00000030446.14 | 0.27949392 | MGI:98916   | Urod          |
| ENSMUST00000032141.13 | 0.27949392 | MGI:1914053 | Hmces         |
| ENSMUST00000032309.12 | 0.27949392 | MGI:2137670 | Ybx3          |
| ENSMUST00000036992.8  | 0.27949392 | MGI:102812  | Lmo1          |
| ENSMUST00000045748.6  | 0.27949392 | MGI:2384308 | Pdk3          |
| ENSMUST00000052509.5  | 0.27949392 | MGI:2442050 | Zfp771        |
| ENSMUST00000075686.6  | 0.27949392 | MGI:2685083 | Ado           |
| ENSMUST00000103007.3  | 0.27949392 | MGI:1930957 | Nudt11        |
| ENSMUST00000103035.9  | 0.27949392 | MGI:1917632 | Kctd2         |
| ENSMUST00000109533.7  | 0.27949392 | MGI:98397   | Src           |
| ENSMUST00000114913.2  | 0.27949392 | MGI:99673   | Adcy5         |
| ENSMUST00000115662.8  | 0.27949392 | MGI:2681880 | Pcdha2        |
| ENSMUST00000146150.2  | 0.27949392 | MGI:1917963 | Gpr137c       |
| ENSMUST00000147147.7  | 0.27949392 | MGI:1924933 | Ehmt1         |
| ENSMUST00000162460.7  | 0.27949392 | MGI:97316   | Nfya          |
| ENSMUST00000210139.1  | 0.27949392 | MGI:1916095 | Pih1d1        |
| ENSMUST00000211933.1  | 0.27949392 | MGI:1914917 | Alkbh8        |

|                       |             |             |         |
|-----------------------|-------------|-------------|---------|
| ENSMUST0000000500.7   | 0.27949392  | MGI:97528   | Pdgfb   |
| ENSMUST00000019803.8  | 0.27949392  | MGI:1919904 | Ccdc12  |
| ENSMUST00000020550.12 | 0.27949392  | MGI:102657  | Cdc34   |
| ENSMUST00000021173.13 | 0.27949392  | MGI:1917150 | Mfsd11  |
| ENSMUST00000021797.8  | 0.27949392  | MGI:1914296 | Tbc1d7  |
| ENSMUST00000025418.3  | 0.27949392  | MGI:1922901 | Psmg2   |
| ENSMUST00000027186.11 | 0.27949392  | MGI:1918077 | Trak2   |
| ENSMUST00000028835.12 | 0.27949392  | MGI:1913836 | Crls1   |
| ENSMUST00000031094.14 | 0.27949392  | MGI:1098708 | Tbc1d14 |
| ENSMUST00000033591.5  | 0.27949392  | MGI:107706  | Itm2a   |
| ENSMUST00000036647.12 | 0.27949392  | MGI:1196405 | Ctdspl2 |
| ENSMUST00000049031.5  | 0.27949392  | MGI:2443086 | Mindy2  |
| ENSMUST00000050120.3  | 0.27949392  | MGI:1914766 | Kctd4   |
| ENSMUST00000052011.14 | 0.27949392  | MGI:104633  | Tle4    |
| ENSMUST00000057072.5  | 0.27949392  | MGI:1336888 | Prdx6b  |
| ENSMUST00000059589.5  | 0.27949392  | MGI:2136886 | Rtn4r   |
| ENSMUST00000059955.14 | 0.27949392  | MGI:1917370 | Yars2   |
| ENSMUST00000059975.7  | 0.27949392  | MGI:1914948 | Fam174a |
| ENSMUST00000085177.4  | 0.27949392  | MGI:1925103 | Msl2    |
| ENSMUST00000086423.5  | 0.27949392  | MGI:3704480 | Gm10184 |
| ENSMUST00000087026.12 | 0.27949392  | MGI:103288  | Polr1c  |
| ENSMUST00000091852.4  | 0.27949392  | MGI:2652843 | Mex3c   |
| ENSMUST00000113460.7  | 0.27949392  | MGI:1352466 | Nr2c2   |
| ENSMUST00000122358.7  | 0.27949392  | MGI:1921390 | Tm9sf1  |
| ENSMUST00000159551.7  | 0.27949392  | MGI:1926395 | Wtap    |
| ENSMUST00000060714.9  | 0.281182466 | MGI:1860283 | Ubqln2  |
| ENSMUST00000014321.4  | 0.283442704 | MGI:1914760 | Tvp23b  |
| ENSMUST00000032824.9  | 0.283442704 | MGI:1346093 | Psmc4   |
| ENSMUST00000033282.4  | 0.283442704 | MGI:1913415 | Bccip   |
| ENSMUST00000072965.4  | 0.283442704 | MGI:1927664 | Sirt2   |
| ENSMUST00000087258.9  | 0.283442704 | MGI:1928994 | Tro     |
| ENSMUST00000103241.7  | 0.283442704 | MGI:2387661 | Sema6d  |
| ENSMUST00000047510.9  | 0.284584112 | MGI:1347343 | Usp5    |
| ENSMUST00000073605.14 | 0.284584112 | MGI:95640   | Gapdh   |
| ENSMUST00000111665.7  | 0.285126851 | MGI:1914208 | Tmx2    |
| ENSMUST00000032477.5  | 0.285444067 | MGI:1914852 | Necap1  |
| ENSMUST00000080281.13 | 0.287507047 | MGI:1913730 | Rpl15   |
| ENSMUST00000033074.7  | 0.288219214 | MGI:106442  | Vkorc1  |
| ENSMUST00000002091.5  | 0.28869242  | MGI:1350933 | Bcap31  |

|                       |             |             |          |
|-----------------------|-------------|-------------|----------|
| ENSMUST00000127095.7  | 0.2888217   | MGI:1346030 | Ly6h     |
| ENSMUST00000045054.10 | 0.28976861  | MGI:1914665 | Tcaf1    |
| ENSMUST00000022616.13 | 0.289829985 | MGI:88423   | Clu      |
| ENSMUST00000020702.10 | 0.290182418 | MGI:96438   | Igfbp3   |
| ENSMUST00000029476.8  | 0.290182418 | MGI:1338759 | Sec22b   |
| ENSMUST00000031355.9  | 0.290182418 | MGI:1929095 | Uso1     |
| ENSMUST00000034843.8  | 0.290182418 | MGI:1928268 | Ireb2    |
| ENSMUST00000047028.8  | 0.290182418 | MGI:1916114 | Lgalsl   |
| ENSMUST00000064139.7  | 0.290182418 | MGI:1915166 | Plpp3    |
| ENSMUST00000168574.8  | 0.290182418 | MGI:2138391 | Pid1     |
| ENSMUST00000222098.1  | 0.290182418 | MGI:1916487 | Gtpbp4   |
| ENSMUST00000167866.1  | 0.291160654 | MGI:1915084 | Idh3a    |
| ENSMUST00000002403.9  | 0.291711339 | MGI:1196314 | Dhrs1    |
| ENSMUST00000026495.14 | 0.292983492 | MGI:88115   | Atp5a1   |
| ENSMUST00000034541.11 | 0.293839422 | MGI:1914648 | Srpr     |
| ENSMUST00000030128.5  | 0.29525799  | MGI:1924209 | Chmp5    |
| ENSMUST00000022135.14 | 0.295641613 | MGI:5510732 | Ak6      |
| ENSMUST00000156400.8  | 0.295686114 | MGI:3833940 | Gm16286  |
| ENSMUST00000019917.5  | 0.297545097 | MGI:1913771 | Rwdd1    |
| ENSMUST00000000206.3  | 0.299059237 | MGI:1919264 | Btbd17   |
| ENSMUST00000010807.5  | 0.299059237 | MGI:1923517 | Fads1    |
| ENSMUST00000014642.9  | 0.299059237 | MGI:2444029 | Ankrd52  |
| ENSMUST00000016897.11 | 0.299059237 | MGI:2443047 | Ttll1    |
| ENSMUST00000025979.12 | 0.299059237 | MGI:1888908 | Aldh18a1 |
| ENSMUST00000038677.4  | 0.299059237 | MGI:2147437 | Rrp12    |
| ENSMUST00000045994.7  | 0.299059237 | MGI:1098653 | Rbm34    |
| ENSMUST00000054815.14 | 0.299059237 | MGI:1336199 | Ppp1r13b |
| ENSMUST00000068023.7  | 0.299059237 | MGI:2449088 | Cadm4    |
| ENSMUST00000073447.7  | 0.299059237 | MGI:1935215 | Pcdhga3  |
| ENSMUST00000127430.1  | 0.299059237 | MGI:1921605 | Smchd1   |
| ENSMUST00000032994.14 | 0.299870973 | MGI:1920908 | Spns1    |
| ENSMUST00000049453.8  | 0.299870973 | MGI:2140998 | Ube3c    |
| ENSMUST00000058615.9  | 0.299870973 | MGI:1914185 | Cir1     |
| ENSMUST00000081291.12 | 0.299870973 | MGI:1859320 | Cyhr1    |
| ENSMUST00000026891.4  | 0.300251049 | MGI:1913696 | Exosc7   |
| ENSMUST00000065515.13 | 0.300471462 | MGI:1338041 | Tfg      |
| ENSMUST00000032946.9  | 0.300615356 | MGI:894313  | Rab6a    |
| ENSMUST00000226459.1  | 0.300615356 | MGI:1913398 | Dnajc15  |
| ENSMUST00000114729.7  | 0.304600372 | MGI:1929772 | Dpysl5   |

|                       |             |             |          |
|-----------------------|-------------|-------------|----------|
| ENSMUST00000026839.4  | 0.305548148 | MGI:97776   | Prps2    |
| ENSMUST00000060455.14 | 0.305548148 | MGI:109595  | Ccndbp1  |
| ENSMUST00000233692.1  | 0.305548148 | MGI:2684934 | Lrrc73   |
| ENSMUST00000045628.14 | 0.305716372 | MGI:1924814 | R3hdm4   |
| ENSMUST00000023133.7  | 0.306705613 | MGI:1889595 | Ppp1r1a  |
| ENSMUST00000069926.13 | 0.307259715 | MGI:2442509 | Slitrk4  |
| ENSMUST00000110057.2  | 0.307259715 | MGI:1918686 | Flrt3    |
| ENSMUST00000161286.7  | 0.307259715 | MGI:106016  | Tra2b    |
| ENSMUST00000029800.8  | 0.307744563 | MGI:1928096 | Tspan5   |
| ENSMUST00000031119.5  | 0.307744563 | MGI:103156  | Gabrg1   |
| ENSMUST00000033121.6  | 0.308849153 | MGI:2385850 | Nomo1    |
| ENSMUST00000031249.7  | 0.309285912 | MGI:108110  | Sparcl1  |
| ENSMUST00000102888.9  | 0.310275644 | MGI:88256   | Camk2a   |
| ENSMUST00000003310.6  | 0.311281462 | MGI:894323  | Ranbp2   |
| ENSMUST00000005705.7  | 0.311281462 | MGI:109274  | Trim28   |
| ENSMUST00000022543.9  | 0.311281462 | MGI:1915764 | Micu2    |
| ENSMUST00000023812.9  | 0.311281462 | MGI:1346881 | Map3k12  |
| ENSMUST00000043961.11 | 0.311281462 | MGI:2386607 | Abca5    |
| ENSMUST00000046875.13 | 0.311281462 | MGI:2443162 | Uggt1    |
| ENSMUST00000113523.8  | 0.311281462 | MGI:2387609 | Tmem63b  |
| ENSMUST00000115527.7  | 0.311281462 | MGI:1915402 | Fam133b  |
| ENSMUST00000163558.2  | 0.311281462 | MGI:1922847 | Ndufaf2  |
| ENSMUST00000077577.7  | 0.311768962 | MGI:107804  | Tuba1b   |
| ENSMUST00000087315.13 | 0.311768962 | MGI:90675   | Vars     |
| ENSMUST00000096261.4  | 0.311768962 | MGI:1914960 | Polr2g   |
| ENSMUST00000027846.7  | 0.311915684 | MGI:1196415 | Tada1    |
| ENSMUST00000234711.1  | 0.311915684 | MGI:2136782 | BC004004 |
| ENSMUST00000094807.5  | 0.313484634 | MGI:3645856 | Pnmal2   |
| ENSMUST00000022057.8  | 0.313879725 | MGI:1920198 | Tppp     |
| ENSMUST00000008477.12 | 0.314621391 | MGI:104805  | Snrpb2   |
| ENSMUST00000028278.13 | 0.316521942 | MGI:1913284 | Psm14    |
| ENSMUST00000239083.1  | 0.316588425 | MGI:1933169 | Sacm1l   |
| ENSMUST00000160132.7  | 0.318022276 | MGI:109207  | Eif4g2   |
| ENSMUST00000118163.7  | 0.318026921 | MGI:2444630 | Dmxl2    |
| ENSMUST00000030622.2  | 0.319178264 | MGI:1915842 | Syf2     |
| ENSMUST00000019734.10 | 0.31969974  | MGI:103253  | Cyb561   |
| ENSMUST00000043627.7  | 0.320783797 | MGI:1926273 | Mrpl12   |
| ENSMUST00000085077.4  | 0.32185909  | MGI:107188  | Arnt2    |
| ENSMUST00000015877.13 | 0.3232088   | MGI:106222  | Capza2   |



|                       |             |             |          |
|-----------------------|-------------|-------------|----------|
| ENSMUST00000075774.4  | 0.323812387 | MGI:1920960 | Tubb2b   |
| ENSMUST00000067538.5  | 0.327705665 | MGI:97815   | Ptprs    |
| ENSMUST00000004200.8  | 0.327767153 | MGI:1913320 | Cwc15    |
| ENSMUST00000049937.12 | 0.327850335 | MGI:1913761 | Chtop    |
| ENSMUST00000113097.7  | 0.327850335 | MGI:1927167 | Morf4l2  |
| ENSMUST00000166170.8  | 0.327850335 | MGI:1858510 | Nell2    |
| ENSMUST00000072697.12 | 0.328152751 | MGI:87867   | Acadm    |
| ENSMUST00000020822.11 | 0.328473958 | MGI:1916375 | Cnot8    |
| ENSMUST00000026129.15 | 0.328473958 | MGI:1915921 | Pcyt2    |
| ENSMUST00000032093.11 | 0.328473958 | MGI:1925144 | Prickle2 |
| ENSMUST00000069168.12 | 0.328473958 | MGI:1913948 | Cpsf6    |
| ENSMUST00000112868.7  | 0.328473958 | MGI:1339656 | Pak3     |
| ENSMUST00000137573.1  | 0.328473958 | MGI:3584369 | Zfp866   |
| ENSMUST00000218879.1  | 0.328473958 | MGI:3714359 | Srp54c   |
| ENSMUST00000006750.7  | 0.329180213 | MGI:1858752 | Rundc3a  |
| ENSMUST00000015501.10 | 0.329180213 | MGI:1346017 | Clpx     |
| ENSMUST00000018478.10 | 0.329180213 | MGI:105051  | Ksr1     |
| ENSMUST00000022734.8  | 0.329180213 | MGI:107373  | Dnajc3   |
| ENSMUST00000032924.5  | 0.329180213 | MGI:1923739 | Kctd13   |
| ENSMUST00000033961.6  | 0.329180213 | MGI:1916992 | Tm2d2    |
| ENSMUST00000037117.5  | 0.329180213 | MGI:2138937 | Gtf3c4   |
| ENSMUST00000041240.3  | 0.329180213 | MGI:1924802 | Shisa4   |
| ENSMUST00000042345.7  | 0.329180213 | MGI:88274   | Ctnna1   |
| ENSMUST00000044083.8  | 0.329180213 | MGI:1916885 | Dapk1    |
| ENSMUST00000044954.6  | 0.329180213 | MGI:1345281 | Slc30a1  |
| ENSMUST00000046168.11 | 0.329180213 | MGI:106316  | Mpped1   |
| ENSMUST00000051822.12 | 0.329180213 | MGI:1917493 | Wdr61    |
| ENSMUST00000054920.4  | 0.329180213 | MGI:2140300 | Myorg    |
| ENSMUST00000056512.13 | 0.329180213 | MGI:2445123 | Wdr41    |
| ENSMUST00000061837.10 | 0.329180213 | MGI:1921092 | Neurl4   |
| ENSMUST00000072572.12 | 0.329180213 | MGI:2142632 | Alg11    |
| ENSMUST00000078324.6  | 0.329180213 | MGI:103301  | Cacnb4   |
| ENSMUST00000082209.12 | 0.329180213 | MGI:103169  | Scn8a    |
| ENSMUST00000102698.9  | 0.329180213 | MGI:1917723 | Rapgef4  |
| ENSMUST00000113966.7  | 0.329180213 | MGI:2687319 | Il1rap1l |
| ENSMUST00000123491.7  | 0.329180213 | MGI:1921462 | Dnal1    |
| ENSMUST00000127664.1  | 0.329180213 | MGI:5141853 | Galnt2l  |
| ENSMUST00000143517.7  | 0.329180213 | MGI:1346867 | Map2k2   |
| ENSMUST00000169266.7  | 0.329180213 | MGI:1918972 | Cic      |

|                       |             |             |          |
|-----------------------|-------------|-------------|----------|
| ENSMUST00000170139.7  | 0.329180213 | MGI:1914448 | Spats2l  |
| ENSMUST00000197284.4  | 0.329180213 | MGI:95614   | Gabra2   |
| ENSMUST00000047672.8  | 0.333266226 | MGI:107186  | Cct2     |
| ENSMUST00000021083.6  | 0.333960411 | MGI:1096361 | Jpt1     |
| ENSMUST00000061796.7  | 0.334720835 | MGI:2155249 | Gpr6     |
| ENSMUST00000000895.12 | 0.336199179 | MGI:1861721 | Necab3   |
| ENSMUST00000027050.9  | 0.33645534  | MGI:1349415 | Cops5    |
| ENSMUST00000102696.4  | 0.336973008 | MGI:98166   | Rps8     |
| ENSMUST00000205002.2  | 0.339009104 | MGI:1913358 | Ndufa9   |
| ENSMUST00000001592.14 | 0.339247196 | MGI:96650   | Jup      |
| ENSMUST00000022916.12 | 0.339247196 | MGI:2443132 | Lrp12    |
| ENSMUST00000023525.8  | 0.339247196 | MGI:1921447 | Gtf2e1   |
| ENSMUST00000040729.8  | 0.339247196 | MGI:1347048 | Clcn7    |
| ENSMUST00000092404.12 | 0.339247196 | MGI:98284   | Srsf2    |
| ENSMUST00000217570.1  | 0.339247196 | MGI:1919391 | Adpgk    |
| ENSMUST00000032168.6  | 0.340069169 | MGI:1858417 | Sec61a1  |
| ENSMUST00000084097.11 | 0.342130289 | MGI:1913327 | Aurkaip1 |
| ENSMUST00000021306.13 | 0.342679574 | MGI:1336880 | Eftud2   |
| ENSMUST00000135573.7  | 0.342679574 | MGI:99523   | Prdx1    |
| ENSMUST00000156816.6  | 0.342679574 | MGI:1351639 | Mrpl15   |
| ENSMUST00000009344.15 | 0.344487149 | MGI:2429950 | Xpo6     |
| ENSMUST00000028623.12 | 0.344487149 | MGI:108050  | Ext2     |
| ENSMUST00000028758.7  | 0.344487149 | MGI:1333822 | ltpka    |
| ENSMUST00000029663.10 | 0.344487149 | MGI:102774  | Aimp1    |
| ENSMUST00000038671.9  | 0.344487149 | MGI:2384899 | Kri1     |
| ENSMUST00000038695.5  | 0.344487149 | MGI:96659   | Kcna2    |
| ENSMUST00000041555.9  | 0.344487149 | MGI:1919793 | Mvb12b   |
| ENSMUST00000042021.4  | 0.344487149 | MGI:2442458 | Tspyl5   |
| ENSMUST00000050872.14 | 0.344487149 | MGI:103188  | Nfib     |
| ENSMUST00000058679.6  | 0.344487149 | MGI:2442842 | Mtmr9    |
| ENSMUST00000059699.8  | 0.344487149 | MGI:2685084 | C2cd4c   |
| ENSMUST00000075175.11 | 0.344487149 | MGI:1913712 | Rex1bd   |
| ENSMUST00000102564.10 | 0.344487149 | MGI:99474   | Arrb2    |
| ENSMUST00000114292.7  | 0.346372376 | MGI:2442722 | Cadm2    |
| ENSMUST00000103220.3  | 0.346630967 | MGI:2444401 | Snrnp200 |
| ENSMUST00000105364.7  | 0.347519081 | MGI:1922656 | Ndufs7   |
| ENSMUST00000167493.8  | 0.347519081 | MGI:1195456 | Rnh1     |
| ENSMUST00000029446.12 | 0.348004835 | MGI:92356   | Csde1    |
| ENSMUST00000021313.8  | 0.352007497 | MGI:1915337 | Dcakd    |

|                       |             |             |               |
|-----------------------|-------------|-------------|---------------|
| ENSMUST00000069538.13 | 0.352007497 | MGI:2443264 | 9330182L06Rik |
| ENSMUST00000022344.3  | 0.353313852 | MGI:1917851 | Ecd           |
| ENSMUST00000027173.14 | 0.353313852 | MGI:1927241 | Wdr12         |
| ENSMUST00000027434.14 | 0.353313852 | MGI:1926045 | Armc9         |
| ENSMUST00000063562.8  | 0.353313852 | MGI:1917728 | Mipep         |
| ENSMUST00000077408.7  | 0.353313852 | MGI:2678952 | Bloc1s3       |
| ENSMUST00000162610.7  | 0.353313852 | MGI:1913503 | Aig1          |
| ENSMUST00000191899.5  | 0.353313852 | MGI:101864  | Dag1          |
| ENSMUST00000031009.7  | 0.355203835 | MGI:109149  | Nsg1          |
| ENSMUST00000001507.4  | 0.355838199 | MGI:106040  | Cyp51         |
| ENSMUST00000081893.6  | 0.356097359 | MGI:98460   | Syn1          |
| ENSMUST00000119953.1  | 0.35712577  | MGI:1913659 | Rsl1d1        |
| ENSMUST00000067826.14 | 0.359056657 | MGI:2151172 | Mta3          |
| ENSMUST00000102632.6  | 0.359056657 | MGI:1338015 | Sort1         |
| ENSMUST00000171342.2  | 0.359056657 | MGI:1914838 | Rnf41         |
| ENSMUST00000003561.9  | 0.359313079 | MGI:1860417 | Phyhip        |
| ENSMUST00000093360.11 | 0.359313079 | MGI:2384849 | Tnpo2         |
| ENSMUST00000067476.8  | 0.36062877  | MGI:1923937 | Spcs3         |
| ENSMUST00000033683.7  | 0.361925996 | MGI:98158   | Rps4x         |
| ENSMUST00000085651.11 | 0.362195068 | MGI:108077  | Nptn          |
| ENSMUST00000013845.12 | 0.363091436 | MGI:1858317 | Timm23        |
| ENSMUST00000044923.14 | 0.363571338 | MGI:1351337 | Ddx24         |
| ENSMUST00000107364.7  | 0.363571338 | MGI:105306  | Rab5c         |
| ENSMUST00000023363.7  | 0.364045709 | MGI:1925255 | Rrn3          |
| ENSMUST00000030164.7  | 0.364668009 | MGI:99919   | Vcp           |
| ENSMUST00000035700.13 | 0.366570507 | MGI:2384296 | Camkv         |
| ENSMUST00000026262.7  | 0.367056842 | MGI:96073   | Hexa          |
| ENSMUST00000028603.9  | 0.367056842 | MGI:1929084 | Fbxo3         |
| ENSMUST00000031309.15 | 0.367056842 | MGI:2144041 | Wsb2          |
| ENSMUST00000033578.6  | 0.367056842 | MGI:2148149 | Magee1        |
| ENSMUST00000039554.6  | 0.367056842 | MGI:1914176 | Trmt6         |
| ENSMUST00000041806.12 | 0.367056842 | MGI:1202717 | Psen1         |
| ENSMUST00000045866.8  | 0.367056842 | MGI:1860494 | Ddx21         |
| ENSMUST00000050149.11 | 0.367056842 | MGI:2444947 | Mical2        |
| ENSMUST00000052457.14 | 0.367056842 | MGI:3039591 | Mtss2         |
| ENSMUST00000065625.11 | 0.367056842 | MGI:1916185 | Trmt1l        |
| ENSMUST00000072896.12 | 0.367056842 | MGI:1914461 | Armc10        |
| ENSMUST00000074669.9  | 0.367056842 | MGI:1330294 | Hnrnpab       |
| ENSMUST00000075164.10 | 0.367056842 | MGI:109234  | Kif21b        |

|                       |             |             |         |
|-----------------------|-------------|-------------|---------|
| ENSMUST00000107596.8  | 0.367056842 | MGI:1933179 | Srcin1  |
| ENSMUST00000109236.8  | 0.367056842 | MGI:1338864 | Stau1   |
| ENSMUST00000140299.2  | 0.367056842 | MGI:2384919 | Rxylt1  |
| ENSMUST00000152227.7  | 0.367056842 | MGI:106313  | Desi1   |
| ENSMUST00000168630.3  | 0.367056842 | MGI:2389364 | Unc5d   |
| ENSMUST00000172785.7  | 0.367056842 | MGI:95896   | H2-D1   |
| ENSMUST00000178202.7  | 0.367056842 | MGI:1333766 | Epn2    |
| ENSMUST00000179669.2  | 0.367056842 | MGI:1347464 | Foxg1   |
| ENSMUST00000202261.4  | 0.367056842 | MGI:2136841 | Morc3   |
| ENSMUST00000204751.2  | 0.367056842 | MGI:1203484 | Zfp638  |
| ENSMUST00000222167.1  | 0.367056842 | MGI:2444706 | Mdga2   |
| ENSMUST0000022176.14  | 0.369830165 | MGI:96159   | Hmgcr   |
| ENSMUST00000107305.7  | 0.369951162 | MGI:1352760 | Hdgfl3  |
| ENSMUST00000078673.13 | 0.37021692  | MGI:2444518 | Samd12  |
| ENSMUST00000021207.6  | 0.370379119 | MGI:1923816 | Rflnb   |
| ENSMUST00000018875.12 | 0.371206273 | MGI:1919020 | Ap2b1   |
| ENSMUST00000023426.11 | 0.371699927 | MGI:2447860 | Cldnd1  |
| ENSMUST00000065694.7  | 0.371732885 | MGI:2442555 | Dis3l2  |
| ENSMUST00000070117.7  | 0.371732885 | MGI:1926143 | Cnot10  |
| ENSMUST00000090178.9  | 0.371732885 | MGI:1917854 | Dnajb14 |
| ENSMUST00000125009.8  | 0.371732885 | MGI:1351342 | Grm5    |
| ENSMUST00000182056.7  | 0.371732885 | MGI:2685783 | Baiap3  |
| ENSMUST00000205568.1  | 0.371732885 | MGI:1338823 | Maz     |
| ENSMUST00000000451.13 | 0.374572149 | MGI:97847   | Raf1    |
| ENSMUST00000021314.7  | 0.374572149 | MGI:102579  | Nmt1    |
| ENSMUST00000037489.14 | 0.374572149 | MGI:1932075 | Agpat1  |
| ENSMUST00000118535.7  | 0.374572149 | MGI:105069  | Rab4a   |
| ENSMUST00000159027.7  | 0.374572149 | MGI:107163  | Ppp3cb  |
| ENSMUST00000237004.1  | 0.374572149 | MGI:1860078 | Txn1    |
| ENSMUST00000100026.9  | 0.376479223 | MGI:1914751 | Ccdc50  |
| ENSMUST00000022108.8  | 0.377848457 | MGI:1337006 | Hapl1   |
| ENSMUST00000002412.8  | 0.378879259 | MGI:104694  | Ncan    |
| ENSMUST00000088244.5  | 0.380586792 | MGI:2661120 | Actr3b  |
| ENSMUST00000081104.9  | 0.382269909 | MGI:1343131 | Timm17a |
| ENSMUST00000165335.7  | 0.385781655 | MGI:95781   | Gnb1    |
| ENSMUST00000114548.7  | 0.387177871 | MGI:1889272 | Cadm1   |
| ENSMUST00000164233.7  | 0.387330149 | MGI:1270129 | Dnaja1  |
| ENSMUST00000091089.11 | 0.388310326 | MGI:107384  | Dnm1    |
| ENSMUST00000027339.13 | 0.389420955 | MGI:2138261 | Smap1   |

|                       |             |             |          |
|-----------------------|-------------|-------------|----------|
| ENSMUST00000021428.8  | 0.389729955 | MGI:1913604 | Snw1     |
| ENSMUST00000029047.11 | 0.389729955 | MGI:1921968 | Snx16    |
| ENSMUST00000020107.7  | 0.390104293 | MGI:104653  | Atp2b1   |
| ENSMUST00000023854.9  | 0.390567146 | MGI:1298387 | Fhl1     |
| ENSMUST00000036854.3  | 0.391154115 | MGI:106504  | Efhd2    |
| ENSMUST00000020317.7  | 0.391922857 | MGI:1913499 | Pno1     |
| ENSMUST00000020576.7  | 0.391922857 | MGI:102890  | Ccng1    |
| ENSMUST00000051711.15 | 0.391922857 | MGI:99638   | Mark2    |
| ENSMUST00000053986.8  | 0.391922857 | MGI:3609246 | Lingo3   |
| ENSMUST00000034140.8  | 0.392973274 | MGI:106419  | Itfg1    |
| ENSMUST00000044158.12 | 0.392973274 | MGI:2154441 | Nop53    |
| ENSMUST00000047898.13 | 0.392973274 | MGI:1354736 | Kdm2a    |
| ENSMUST00000101801.6  | 0.392973274 | MGI:95994   | Selenos  |
| ENSMUST00000114144.8  | 0.392973274 | MGI:2444277 | Islr2    |
| ENSMUST00000120447.7  | 0.392973274 | MGI:1201607 | Blzf1    |
| ENSMUST00000014339.14 | 0.39449491  | MGI:1928373 | Dnaja7   |
| ENSMUST00000029875.3  | 0.39449491  | MGI:1919769 | Pip4p2   |
| ENSMUST00000047616.9  | 0.39449491  | MGI:1858910 | Jmjd6    |
| ENSMUST00000058943.7  | 0.39449491  | MGI:3617846 | Ankrd34a |
| ENSMUST00000073364.5  | 0.39449491  | MGI:2387687 | Fam120c  |
| ENSMUST00000075812.10 | 0.39449491  | MGI:1276574 | Nsd2     |
| ENSMUST00000009036.10 | 0.395824709 | MGI:106922  | Vdac3    |
| ENSMUST00000003183.11 | 0.396896534 | MGI:102666  | Ppp5c    |
| ENSMUST00000018792.11 | 0.396896534 | MGI:1927168 | Dusp14   |
| ENSMUST00000022102.8  | 0.396896534 | MGI:2442892 | Clptm1l  |
| ENSMUST00000028951.13 | 0.396896534 | MGI:2139270 | Snph     |
| ENSMUST00000064099.7  | 0.396896534 | MGI:2442163 | Ppp6r1   |
| ENSMUST00000074950.10 | 0.396896534 | MGI:1201779 | Hnrnph2  |
| ENSMUST00000106830.8  | 0.396896534 | MGI:108554  | Dab1     |
| ENSMUST00000114449.6  | 0.396896534 | MGI:1891748 | Maea     |
| ENSMUST00000126610.1  | 0.396896534 | MGI:98002   | Rpl12    |
| ENSMUST00000134159.2  | 0.396896534 | MGI:1919955 | Zcchc17  |
| ENSMUST00000178422.8  | 0.396896534 | MGI:1203520 | Dapk3    |
| ENSMUST00000111632.4  | 0.39702426  | MGI:1352498 | Ndrp2    |
| ENSMUST00000037941.9  | 0.397549931 | MGI:1096398 | Cd81     |
| ENSMUST00000032898.8  | 0.399747553 | MGI:1917822 | Ipo5     |
| ENSMUST00000102774.10 | 0.400930974 | MGI:107931  | Sqstm1   |
| ENSMUST00000006853.10 | 0.401252053 | MGI:1921693 | P4htm    |
| ENSMUST00000019615.10 | 0.401252053 | MGI:109531  | Cdc37    |

|                       |             |             |         |
|-----------------------|-------------|-------------|---------|
| ENSMUST00000020316.3  | 0.401252053 | MGI:1929658 | Tbk1    |
| ENSMUST00000020851.14 | 0.401252053 | MGI:1917052 | Cox11   |
| ENSMUST00000024761.12 | 0.401252053 | MGI:1354704 | Fbxl17  |
| ENSMUST00000025696.4  | 0.401252053 | MGI:1860835 | Ak3     |
| ENSMUST00000028815.14 | 0.401252053 | MGI:1859682 | Slc23a2 |
| ENSMUST00000029786.13 | 0.401252053 | MGI:2137211 | Mrpl9   |
| ENSMUST00000031288.13 | 0.401252053 | MGI:1930075 | Tfip11  |
| ENSMUST00000034739.11 | 0.401252053 | MGI:1934919 | Rnf111  |
| ENSMUST00000034775.9  | 0.401252053 | MGI:1335087 | Fem1b   |
| ENSMUST00000036719.11 | 0.401252053 | MGI:3040696 | Prex1   |
| ENSMUST00000037270.4  | 0.401252053 | MGI:1277178 | Fam91a1 |
| ENSMUST00000041099.4  | 0.401252053 | MGI:1339708 | Neurod1 |
| ENSMUST00000049239.7  | 0.401252053 | MGI:1925503 | Map4k5  |
| ENSMUST00000051207.1  | 0.401252053 | MGI:2144150 | Slc35e4 |
| ENSMUST00000057557.13 | 0.401252053 | MGI:1920977 | Mcmbp   |
| ENSMUST00000060805.6  | 0.401252053 | MGI:2446163 | Fam120a |
| ENSMUST00000060989.8  | 0.401252053 | MGI:1202296 | Sorl1   |
| ENSMUST00000061262.10 | 0.401252053 | MGI:2442488 | Podxl2  |
| ENSMUST00000062684.8  | 0.401252053 | MGI:2140359 | Tmem64  |
| ENSMUST00000068581.8  | 0.401252053 | MGI:95713   | Gja1    |
| ENSMUST00000099326.9  | 0.401252053 | MGI:109137  | Rasgrf2 |
| ENSMUST00000106542.8  | 0.401252053 | MGI:2445087 | Hid1    |
| ENSMUST00000117301.7  | 0.401252053 | MGI:99216   | Ddr1    |
| ENSMUST00000129820.7  | 0.401252053 | MGI:1919540 | Lsm11   |
| ENSMUST00000139129.8  | 0.401252053 | MGI:98283   | Srsf1   |
| ENSMUST00000146590.7  | 0.401252053 | MGI:1931881 | Dnajb12 |
| ENSMUST00000215073.1  | 0.401252053 | MGI:1919334 | Pigx    |
| ENSMUST00000219915.1  | 0.401252053 | MGI:1891704 | Hbs1l   |
| ENSMUST00000002710.9  | 0.401252053 | MGI:1915329 | Pdcd2l  |
| ENSMUST00000015124.14 | 0.401252053 | MGI:1913887 | Tsen15  |
| ENSMUST00000022550.7  | 0.401252053 | MGI:1860765 | Extl3   |
| ENSMUST00000023221.12 | 0.401252053 | MGI:1202392 | Gpaa1   |
| ENSMUST00000029090.8  | 0.401252053 | MGI:1923675 | Gid8    |
| ENSMUST00000029699.12 | 0.401252053 | MGI:96794   | Lmna    |
| ENSMUST00000030181.11 | 0.401252053 | MGI:1913423 | Ccdc107 |
| ENSMUST00000031017.10 | 0.401252053 | MGI:102858  | Fosl2   |
| ENSMUST00000032748.14 | 0.401252053 | MGI:2142246 | Unc45a  |
| ENSMUST00000034264.10 | 0.401252053 | MGI:1913421 | Pgls    |
| ENSMUST00000035667.8  | 0.401252053 | MGI:1914775 | Trim62  |

|                       |             |             |          |
|-----------------------|-------------|-------------|----------|
| ENSMUST00000040531.8  | 0.401252053 | MGI:2448542 | Samd4b   |
| ENSMUST00000092937.12 | 0.401252053 | MGI:1891766 | Camkk1   |
| ENSMUST00000171561.7  | 0.401252053 | MGI:1919449 | Mms19    |
| ENSMUST00000006774.10 | 0.401252053 | MGI:1277216 | Gtf2h1   |
| ENSMUST00000009120.7  | 0.401252053 | MGI:95610   | Gabpa    |
| ENSMUST00000011055.6  | 0.401252053 | MGI:1926788 | Apip     |
| ENSMUST00000015481.5  | 0.401252053 | MGI:1261433 | Endog    |
| ENSMUST00000025101.9  | 0.401252053 | MGI:1913996 | Dync2li1 |
| ENSMUST00000028584.7  | 0.401252053 | MGI:1923751 | Commd9   |
| ENSMUST00000029759.15 | 0.401252053 | MGI:2442926 | Mettl14  |
| ENSMUST00000033950.6  | 0.401252053 | MGI:1923847 | Gins4    |
| ENSMUST00000034920.10 | 0.401252053 | MGI:1346345 | Map2k5   |
| ENSMUST00000048677.8  | 0.401252053 | MGI:2681867 | Tbc1d22b |
| ENSMUST00000066264.12 | 0.401252053 | MGI:1858208 | Ech1     |
| ENSMUST00000078525.6  | 0.401252053 | MGI:2443860 | Rnf150   |
| ENSMUST00000130911.7  | 0.401252053 | MGI:97317   | Nfyb     |
| ENSMUST00000151288.7  | 0.401252053 | MGI:2146236 | Slc45a4  |
| ENSMUST00000164787.7  | 0.401252053 | MGI:1344366 | Cdh18    |
| ENSMUST00000171292.7  | 0.401252053 | MGI:1925505 | Ralgps2  |
| ENSMUST00000172332.3  | 0.401252053 | MGI:1919373 | Ccdc71l  |
| ENSMUST00000221919.1  | 0.401252053 | MGI:3026685 | Zfyve1   |
| ENSMUST00000138532.7  | 0.40128392  | MGI:1921376 | Syvn1    |
| ENSMUST00000028098.10 | 0.40321298  | MGI:1347043 | Orc4     |
| ENSMUST00000049911.15 | 0.40321298  | MGI:107365  | Ube2i    |
| ENSMUST00000006367.7  | 0.404731656 | MGI:1929076 | Htra1    |
| ENSMUST00000193547.5  | 0.405004758 | MGI:97281   | Ncam1    |
| ENSMUST00000021785.7  | 0.405707354 | MGI:1913732 | Exoc2    |
| ENSMUST00000023343.3  | 0.405707354 | MGI:1915091 | Atg3     |
| ENSMUST00000032124.8  | 0.405707354 | MGI:1926274 | Mrpl19   |
| ENSMUST00000135088.8  | 0.405851507 | MGI:891963  | Ywhaq    |
| ENSMUST00000070524.4  | 0.40668601  | MGI:105080  | Tgoln1   |
| ENSMUST00000074015.10 | 0.40668601  | MGI:2444846 | Negr1    |
| ENSMUST00000195717.5  | 0.407115321 | MGI:1918348 | Cep170   |
| ENSMUST00000033342.6  | 0.408556339 | MGI:1913335 | Eif3f    |
| ENSMUST00000102817.4  | 0.409537899 | MGI:95639   | Gap43    |
| ENSMUST00000224625.1  | 0.411287754 | MGI:102706  | Fdft1    |
| ENSMUST00000004786.9  | 0.413798128 | MGI:1913670 | Polr2e   |
| ENSMUST00000032185.8  | 0.413798128 | MGI:98488   | Slc6a6   |
| ENSMUST00000050214.8  | 0.413798128 | MGI:1860606 | Akap8l   |

|                       |             |             |          |
|-----------------------|-------------|-------------|----------|
| ENSMUST00000080065.2  | 0.413798128 | MGI:1347347 | Slc27a4  |
| ENSMUST00000081650.14 | 0.413798128 | MGI:1351605 | Rpl3     |
| ENSMUST00000088896.9  | 0.413798128 | MGI:2442368 | Tmcc1    |
| ENSMUST00000032440.5  | 0.414192821 | MGI:99832   | Sec13    |
| ENSMUST00000066140.12 | 0.414192821 | MGI:1935203 | Pcdhgc4  |
| ENSMUST00000155737.7  | 0.414192821 | MGI:104581  | Gnb4     |
| ENSMUST00000084935.10 | 0.414448016 | MGI:1918224 | Pgm2l1   |
| ENSMUST00000219317.1  | 0.416142815 | MGI:99529   | Cd63     |
| ENSMUST00000004507.10 | 0.42101672  | MGI:1277172 | Ddx56    |
| ENSMUST00000030427.5  | 0.42101672  | MGI:1351315 | Eloa     |
| ENSMUST00000036691.13 | 0.42101672  | MGI:1923304 | Prrc2b   |
| ENSMUST00000047309.5  | 0.42101672  | MGI:3039561 | Nat14    |
| ENSMUST00000063854.6  | 0.42101672  | MGI:3027896 | Ppp4r2   |
| ENSMUST00000055655.8  | 0.421233914 | MGI:95485   | Fasn     |
| ENSMUST00000112856.2  | 0.423806198 | MGI:1277171 | Dcx      |
| ENSMUST00000086216.8  | 0.42423254  | MGI:1929722 | Anapc5   |
| ENSMUST00000053183.11 | 0.426141125 | MGI:99432   | Arf3     |
| ENSMUST00000036274.7  | 0.428086982 | MGI:1913874 | Spcs2    |
| ENSMUST00000006128.6  | 0.430242857 | MGI:104559  | Rcn1     |
| ENSMUST00000018645.12 | 0.430376641 | MGI:1349717 | Ncor1    |
| ENSMUST00000034879.4  | 0.430376641 | MGI:1914117 | Hmg20a   |
| ENSMUST00000036439.5  | 0.430376641 | MGI:107435  | Cdh6     |
| ENSMUST00000038570.8  | 0.430376641 | MGI:1278344 | Nipsnap1 |
| ENSMUST00000091903.4  | 0.430376641 | MGI:1344391 | Sh3bp5   |
| ENSMUST00000113792.1  | 0.431337658 | MGI:1101765 | Pja1     |
| ENSMUST00000234810.1  | 0.431419205 | MGI:102790  | Rab18    |
| ENSMUST00000020755.11 | 0.433346855 | MGI:2144474 | Ppp4r3b  |
| ENSMUST00000024816.12 | 0.433346855 | MGI:1921407 | Cmtr1    |
| ENSMUST00000026267.15 | 0.433346855 | MGI:1914537 | Parp6    |
| ENSMUST00000033333.12 | 0.433346855 | MGI:1915254 | Tmem9b   |
| ENSMUST00000034713.8  | 0.433346855 | MGI:96765   | Ldlr     |
| ENSMUST00000035325.14 | 0.433346855 | MGI:1330818 | Qsox1    |
| ENSMUST00000039333.9  | 0.433346855 | MGI:2442188 | Pdpr     |
| ENSMUST00000041282.12 | 0.433346855 | MGI:2153072 | Trim37   |
| ENSMUST00000049896.12 | 0.433346855 | MGI:1859610 | Gpkow    |
| ENSMUST00000058902.5  | 0.433346855 | MGI:2442895 | Eml6     |
| ENSMUST00000069399.6  | 0.433346855 | MGI:1922151 | Kbtbd11  |
| ENSMUST00000071564.13 | 0.433346855 | MGI:1354699 | Fbh1     |
| ENSMUST00000106113.1  | 0.433346855 | MGI:1916087 | Foxk2    |



|                       |             |             |          |
|-----------------------|-------------|-------------|----------|
| ENSMUST00000109283.1  | 0.433346855 | MGI:2146030 | Slc2a13  |
| ENSMUST00000114985.9  | 0.433346855 | MGI:98506   | Tcf4     |
| ENSMUST00000115812.9  | 0.433346855 | MGI:2445019 | Pik3c3   |
| ENSMUST00000209579.1  | 0.433346855 | MGI:1100517 | Clpb     |
| ENSMUST00000029405.7  | 0.43344814  | MGI:2448526 | Gmps     |
| ENSMUST00000209099.1  | 0.43344814  | MGI:98886   | U2af2    |
| ENSMUST00000045068.9  | 0.435836028 | MGI:2384571 | Cplx3    |
| ENSMUST00000062677.11 | 0.435836028 | MGI:2144726 | Tmem11   |
| ENSMUST00000098950.5  | 0.435836028 | MGI:1100851 | Elavl1   |
| ENSMUST00000107157.8  | 0.435836028 | MGI:1923626 | Slc24a2  |
| ENSMUST00000040538.9  | 0.438421186 | MGI:1924486 | Sccpdh   |
| ENSMUST00000030212.14 | 0.439412665 | MGI:700009  | Sh3gl2   |
| ENSMUST00000151937.7  | 0.440675833 | MGI:1926080 | Slc25a12 |
| ENSMUST00000005256.13 | 0.440920601 | MGI:1341799 | Ndrp1    |
| ENSMUST00000019199.13 | 0.440920601 | MGI:99907   | Plod1    |
| ENSMUST00000098924.8  | 0.440920601 | MGI:1889575 | Adar     |
| ENSMUST00000176381.7  | 0.440920601 | MGI:1928483 | Stx5a    |
| ENSMUST00000021536.8  | 0.441303625 | MGI:1921084 | Atp6v1d  |
| ENSMUST00000173867.7  | 0.442374529 | MGI:104689  | Cct4     |
| ENSMUST00000179238.7  | 0.442437152 | MGI:97783   | Psap     |
| ENSMUST00000098651.5  | 0.444770216 | MGI:1913125 | Pias1    |
| ENSMUST00000107107.8  | 0.444770216 | MGI:104810  | Plaa     |
| ENSMUST00000112862.6  | 0.444770216 | MGI:1921442 | Arpc5l   |
| ENSMUST00000178328.7  | 0.444770216 | MGI:1351614 | Gyg      |
| ENSMUST00000021217.10 | 0.449410322 | MGI:97356   | Nme2     |
| ENSMUST00000028551.3  | 0.45180781  | MGI:1915282 | Emc4     |
| ENSMUST00000021668.9  | 0.452011824 | MGI:1915213 | Npc2     |
| ENSMUST00000207883.1  | 0.452395599 | MGI:1201690 | Map6     |
| ENSMUST00000079828.6  | 0.454736118 | MGI:97384   | Ntrk2    |
| ENSMUST00000120381.8  | 0.456952978 | MGI:105124  | Stt3a    |
| ENSMUST00000021940.7  | 0.456997886 | MGI:1914140 | Lman2    |
| ENSMUST00000121720.1  | 0.456997886 | MGI:106654  | Nap1l2   |
| ENSMUST00000027741.11 | 0.457130231 | MGI:97932   | Xpr1     |
| ENSMUST00000039431.13 | 0.457233611 | MGI:97385   | Ntrk3    |
| ENSMUST00000118152.7  | 0.457384683 | MGI:109372  | Cbx5     |
| ENSMUST00000088001.5  | 0.457626344 | MGI:1338758 | Adnp     |
| ENSMUST00000093165.11 | 0.457626344 | MGI:1924134 | Cyfp2    |
| ENSMUST00000095012.9  | 0.457626344 | MGI:107558  | Sema3a   |
| ENSMUST00000160852.7  | 0.457626344 | MGI:6303289 | Gm50387  |

|                       |             |             |               |
|-----------------------|-------------|-------------|---------------|
| ENSMUST00000164782.9  | 0.457626344 | MGI:1278313 | Coch          |
| ENSMUST00000003268.10 | 0.458074965 | MGI:700010  | Sh3gl1        |
| ENSMUST00000004133.10 | 0.458074965 | MGI:2443333 | Brinp2        |
| ENSMUST00000023830.15 | 0.458074965 | MGI:1196365 | Nus1          |
| ENSMUST00000025925.10 | 0.458074965 | MGI:2179715 | Plaat3        |
| ENSMUST00000043616.6  | 0.458074965 | MGI:2685277 | Zyg11b        |
| ENSMUST00000052236.12 | 0.458074965 | MGI:2686937 | Fbxo10        |
| ENSMUST00000106027.8  | 0.458074965 | MGI:2141847 | Phrf1         |
| ENSMUST00000109901.8  | 0.458074965 | MGI:109301  | Papola        |
| ENSMUST00000113028.1  | 0.458074965 | MGI:1916111 | Dipk2a        |
| ENSMUST00000113573.7  | 0.458074965 | MGI:103067  | Atrx          |
| ENSMUST00000078124.7  | 0.460104811 | MGI:101763  | Cfl2          |
| ENSMUST00000050552.14 | 0.462540489 | MGI:1914132 | Bzw1          |
| ENSMUST00000086199.11 | 0.464515798 | MGI:95739   | Glul          |
| ENSMUST00000062125.10 | 0.464910885 | MGI:1917023 | Timm29        |
| ENSMUST00000036004.15 | 0.465553797 | MGI:104820  | Hnrnpa1       |
| ENSMUST00000034988.9  | 0.466397943 | MGI:1916769 | Rwdd2a        |
| ENSMUST00000047951.8  | 0.466397943 | MGI:2446216 | Fbxo2         |
| ENSMUST00000026016.12 | 0.468531107 | MGI:1919268 | Fundc1        |
| ENSMUST00000091556.11 | 0.468531107 | MGI:2385155 | Btbd3         |
| ENSMUST00000022875.6  | 0.471848335 | MGI:3045421 | Ank           |
| ENSMUST00000027579.16 | 0.471848335 | MGI:1921367 | Actr3         |
| ENSMUST00000033695.5  | 0.471848335 | MGI:109533  | Abcb7         |
| ENSMUST00000090006.11 | 0.471848335 | MGI:96610   | ltgb1         |
| ENSMUST00000108241.7  | 0.471848335 | MGI:2445193 | Utp6          |
| ENSMUST00000162875.7  | 0.471848335 | MGI:1919347 | 2010300C02Rik |
| ENSMUST00000000759.8  | 0.472085012 | MGI:1920159 | Chmp1a        |
| ENSMUST00000018186.15 | 0.472169123 | MGI:94893   | Cyb5r3        |
| ENSMUST00000022063.13 | 0.477714244 | MGI:1914683 | Ccdc127       |
| ENSMUST00000028807.5  | 0.477714244 | MGI:1929242 | lvd           |
| ENSMUST00000034876.9  | 0.477714244 | MGI:1928098 | Tspan3        |
| ENSMUST00000042281.13 | 0.477714244 | MGI:2384931 | Dhrs7b        |
| ENSMUST00000053918.8  | 0.477714244 | MGI:1913444 | Pycl          |
| ENSMUST00000066285.5  | 0.477714244 | MGI:1920692 | Hspa12a       |
| ENSMUST00000066496.9  | 0.477714244 | MGI:2144158 | Nudcd3        |
| ENSMUST00000071898.6  | 0.477714244 | MGI:2679722 | Cpsf1         |
| ENSMUST00000086521.10 | 0.477714244 | MGI:104518  | Cntn2         |
| ENSMUST00000219706.1  | 0.477714244 | MGI:1914820 | Slc39a9       |
| ENSMUST00000022496.8  | 0.478451947 | MGI:1100863 | Kpna3         |

|                       |             |             |          |
|-----------------------|-------------|-------------|----------|
| ENSMUST00000068456.7  | 0.478451947 | MGI:95617   | Gabra5   |
| ENSMUST00000079278.4  | 0.478451947 | MGI:2684969 | Nrsn2    |
| ENSMUST00000111288.3  | 0.478451947 | MGI:2155987 | Caln1    |
| ENSMUST00000102871.9  | 0.478945426 | MGI:96721   | L1cam    |
| ENSMUST00000022894.13 | 0.479630625 | MGI:109484  | Ywhaz    |
| ENSMUST00000036125.9  | 0.481502801 | MGI:1341822 | Eif4h    |
| ENSMUST00000131656.1  | 0.482328002 | MGI:1917143 | Coa7     |
| ENSMUST00000022286.7  | 0.482758457 | MGI:1343135 | Ndufs4   |
| ENSMUST00000035295.5  | 0.48356947  | MGI:1097711 | Degs1    |
| ENSMUST00000029414.11 | 0.48396146  | MGI:1914687 | Ssr3     |
| ENSMUST00000035045.14 | 0.48410272  | MGI:1100856 | Mras     |
| ENSMUST00000051870.7  | 0.48410272  | MGI:1196398 | Champ1   |
| ENSMUST00000056136.3  | 0.48410272  | MGI:1194504 | Kcnj10   |
| ENSMUST00000111435.8  | 0.48410272  | MGI:1915731 | Mpzl1    |
| ENSMUST00000072334.11 | 0.484146391 | MGI:892995  | Dnajc5   |
| ENSMUST00000003451.10 | 0.48668115  | MGI:2444878 | Rnd1     |
| ENSMUST00000064433.10 | 0.48668115  | MGI:1355335 | Tmod2    |
| ENSMUST00000019198.6  | 0.49056945  | MGI:1913687 | Fis1     |
| ENSMUST00000220621.1  | 0.491541932 | MGI:2137226 | Mrpl32   |
| ENSMUST00000154166.7  | 0.492796423 | MGI:1933830 | Enpp5    |
| ENSMUST00000019302.9  | 0.493690367 | MGI:1916344 | Tmem160  |
| ENSMUST00000022623.12 | 0.493690367 | MGI:1914104 | Trim35   |
| ENSMUST00000031003.10 | 0.493690367 | MGI:2442660 | Ppp2r2c  |
| ENSMUST00000079258.6  | 0.493690367 | MGI:894702  | Numbl    |
| ENSMUST00000135807.1  | 0.493690367 | MGI:1925031 | Epm2aip1 |
| ENSMUST00000222508.1  | 0.493690367 | MGI:1913939 | Klhl28   |
| ENSMUST00000237783.1  | 0.493690367 | MGI:104719  | Ndst1    |
| ENSMUST00000022451.13 | 0.49477177  | MGI:1338030 | Capn7    |
| ENSMUST00000029542.11 | 0.49477177  | MGI:2140050 | Ints3    |
| ENSMUST00000077066.7  | 0.49477177  | MGI:2147713 | Tmem151a |
| ENSMUST00000058119.8  | 0.495930793 | MGI:1924226 | Arxes2   |
| ENSMUST00000100301.10 | 0.495944503 | MGI:97597   | Prkcg    |
| ENSMUST00000047910.14 | 0.499517921 | MGI:1929701 | Metap2   |
| ENSMUST00000001240.11 | 0.502597628 | MGI:1336186 | Agpat3   |
| ENSMUST00000143567.7  | 0.502597628 | MGI:88111   | Atp2b4   |
| ENSMUST00000000199.7  | 0.504144678 | MGI:109166  | Ncs1     |
| ENSMUST00000044148.2  | 0.504144678 | MGI:1914731 | Alg2     |
| ENSMUST00000034591.10 | 0.506941553 | MGI:1346542 | Bace1    |
| ENSMUST00000037001.9  | 0.506941553 | MGI:1915864 | Letmd1   |

|                       |             |             |          |
|-----------------------|-------------|-------------|----------|
| ENSMUST00000060210.13 | 0.510331013 | MGI:107672  | Gpm6b    |
| ENSMUST00000071103.9  | 0.510968714 | MGI:2144727 | Ddx1     |
| ENSMUST00000032454.7  | 0.512172827 | MGI:95627   | Slc6a1   |
| ENSMUST00000043396.14 | 0.512444278 | MGI:97357   | Mycn     |
| ENSMUST00000069360.13 | 0.512444278 | MGI:104903  | Gpc3     |
| ENSMUST00000113658.7  | 0.512444278 | MGI:95698   | Gfpt1    |
| ENSMUST00000020640.7  | 0.513209158 | MGI:101849  | Rack1    |
| ENSMUST00000018880.13 | 0.513529219 | MGI:1932915 | Ndel1    |
| ENSMUST00000022782.9  | 0.513529219 | MGI:1929480 | Lrp10    |
| ENSMUST00000026547.8  | 0.513529219 | MGI:1921487 | Tubgcp2  |
| ENSMUST00000030170.14 | 0.513529219 | MGI:3051532 | Unc13a   |
| ENSMUST00000031144.13 | 0.513529219 | MGI:894407  | Tmem165  |
| ENSMUST00000041968.10 | 0.513529219 | MGI:1920009 | Tmem135  |
| ENSMUST00000048688.7  | 0.513529219 | MGI:2444639 | Fbxo38   |
| ENSMUST00000049005.14 | 0.513529219 | MGI:1338938 | Bmpr1a   |
| ENSMUST00000055833.11 | 0.513529219 | MGI:109349  | Atf2     |
| ENSMUST00000057669.15 | 0.513529219 | MGI:1346859 | Mapk3    |
| ENSMUST00000067190.11 | 0.513529219 | MGI:96788   | Lifr     |
| ENSMUST00000071169.8  | 0.513529219 | MGI:1919784 | Rcc2     |
| ENSMUST00000082237.6  | 0.513529219 | MGI:1918252 | Mex3b    |
| ENSMUST00000087617.10 | 0.513529219 | MGI:1915126 | Coq10b   |
| ENSMUST00000094097.11 | 0.513529219 | MGI:1289225 | Tmem41b  |
| ENSMUST00000112558.9  | 0.513529219 | MGI:1889008 | Atp2c1   |
| ENSMUST00000112601.8  | 0.513529219 | MGI:87911   | Acvr1    |
| ENSMUST00000118878.7  | 0.513529219 | MGI:1336878 | Taf1     |
| ENSMUST00000150843.7  | 0.513529219 | MGI:1921700 | Pank2    |
| ENSMUST00000161354.8  | 0.513529219 | MGI:1890594 | Abcg4    |
| ENSMUST00000163949.8  | 0.513529219 | MGI:96968   | Mest     |
| ENSMUST00000167487.7  | 0.513529219 | MGI:98935   | Vldlr    |
| ENSMUST00000213937.1  | 0.513529219 | MGI:2143099 | Al593442 |
| ENSMUST00000023684.13 | 0.513529219 | MGI:95654   | Gart     |
| ENSMUST00000023867.7  | 0.513529219 | MGI:1341868 | Rfc2     |
| ENSMUST00000025745.9  | 0.513529219 | MGI:2660674 | Mrpl21   |
| ENSMUST00000027973.13 | 0.513529219 | MGI:1923580 | Sephs1   |
| ENSMUST00000029941.15 | 0.513529219 | MGI:1927489 | Pdlim5   |
| ENSMUST00000034076.15 | 0.513529219 | MGI:88281   | Cbln1    |
| ENSMUST00000043760.14 | 0.513529219 | MGI:107624  | Mvk      |
| ENSMUST00000054048.9  | 0.513529219 | MGI:2441884 | Mrgpre   |
| ENSMUST00000069449.6  | 0.513529219 | MGI:1914172 | Rras2    |

|                       |             |             |               |
|-----------------------|-------------|-------------|---------------|
| ENSMUST00000080008.12 | 0.513529219 | MGI:1924288 | Arfgap2       |
| ENSMUST00000099557.9  | 0.513529219 | MGI:2679420 | Pak6          |
| ENSMUST00000228366.2  | 0.513529219 | MGI:2385017 | Nrbp2         |
| ENSMUST00000005064.13 | 0.513529219 | MGI:2136940 | Pias4         |
| ENSMUST00000005490.9  | 0.513529219 | MGI:1096331 | Slc1a6        |
| ENSMUST00000014698.9  | 0.513529219 | MGI:1351602 | Dguok         |
| ENSMUST00000017908.2  | 0.513529219 | MGI:1919221 | Zswim1        |
| ENSMUST00000018002.12 | 0.513529219 | MGI:2387217 | Ift52         |
| ENSMUST00000023219.8  | 0.513529219 | MGI:1354705 | Fbxl6         |
| ENSMUST00000024783.8  | 0.513529219 | MGI:1858419 | Bysl          |
| ENSMUST00000025834.14 | 0.513529219 | MGI:1924963 | Peli3         |
| ENSMUST00000026989.14 | 0.513529219 | MGI:1921162 | 4833439L19Rik |
| ENSMUST00000028080.11 | 0.513529219 | MGI:1921353 | Neb1          |
| ENSMUST00000028356.8  | 0.513529219 | MGI:1913455 | Cd302         |
| ENSMUST00000029696.10 | 0.513529219 | MGI:1921450 | Khdc4         |
| ENSMUST00000029908.7  | 0.513529219 | MGI:1923382 | Faxc          |
| ENSMUST00000032194.10 | 0.513529219 | MGI:1097714 | Bhlhe40       |
| ENSMUST00000034239.8  | 0.513529219 | MGI:1921437 | Katnb1        |
| ENSMUST00000037190.14 | 0.513529219 | MGI:1919862 | Hpf1          |
| ENSMUST00000038584.8  | 0.513529219 | MGI:2441683 | Tlk1          |
| ENSMUST00000040560.10 | 0.513529219 | MGI:1913649 | Tsfm          |
| ENSMUST00000043305.13 | 0.513529219 | MGI:2685541 | Wdtdc1        |
| ENSMUST00000063169.9  | 0.513529219 | MGI:2447771 | Dleu7         |
| ENSMUST00000066498.7  | 0.513529219 | MGI:3045722 | Tmem255a      |
| ENSMUST00000075452.6  | 0.513529219 | MGI:1921527 | Chic2         |
| ENSMUST00000086421.8  | 0.513529219 | MGI:1306821 | Nck2          |
| ENSMUST00000105287.10 | 0.513529219 | MGI:94872   | Dcn           |
| ENSMUST00000106107.2  | 0.513529219 | MGI:2183451 | Rab40b        |
| ENSMUST00000116375.1  | 0.513529219 | MGI:1914587 | Cstf1         |
| ENSMUST00000118108.1  | 0.513529219 | MGI:2139530 | Rabepk        |
| ENSMUST00000123614.7  | 0.513529219 | MGI:1916372 | Ptgr2         |
| ENSMUST00000144711.8  | 0.513529219 | MGI:1924662 | Wdr17         |
| ENSMUST00000160399.7  | 0.513529219 | MGI:1277169 | Echdc1        |
| ENSMUST00000004646.12 | 0.51811062  | MGI:1345964 | Coro1c        |
| ENSMUST00000038973.6  | 0.51811062  | MGI:2147006 | Gnptg         |
| ENSMUST00000070080.5  | 0.51811062  | MGI:1928380 | B4galt6       |
| ENSMUST00000110942.10 | 0.51811062  | MGI:1914466 | Mboat2        |
| ENSMUST00000027602.14 | 0.518831706 | MGI:2442544 | Dars          |
| ENSMUST00000030491.8  | 0.520757196 | MGI:1913838 | Cmpk1         |

|                       |             |             |           |
|-----------------------|-------------|-------------|-----------|
| ENSMUST00000043235.7  | 0.520757196 | MGI:1915087 | Tiprl     |
| ENSMUST00000084502.6  | 0.521319749 | MGI:1343463 | Bub3      |
| ENSMUST00000022842.15 | 0.521894778 | MGI:107185  | Cct5      |
| ENSMUST00000003754.7  | 0.524524532 | MGI:101914  | Calb2     |
| ENSMUST00000005964.6  | 0.524524532 | MGI:87929   | Adh5      |
| ENSMUST00000223396.1  | 0.525849851 | MGI:99845   | Gdi2      |
| ENSMUST00000100528.4  | 0.526485625 | MGI:1343160 | Ube2z     |
| ENSMUST00000022075.5  | 0.527652827 | MGI:97511   | Pcsk1     |
| ENSMUST00000035276.4  | 0.527652827 | MGI:1913672 | Dctpp1    |
| ENSMUST00000066091.13 | 0.527652827 | MGI:109452  | Smad1     |
| ENSMUST00000015146.15 | 0.530496199 | MGI:1923990 | Efr3a     |
| ENSMUST00000018625.9  | 0.530496199 | MGI:1914134 | Appbp2    |
| ENSMUST00000023217.10 | 0.530496199 | MGI:1334460 | Bop1      |
| ENSMUST00000031793.7  | 0.530496199 | MGI:1927186 | Nt5c3     |
| ENSMUST00000037370.13 | 0.530496199 | MGI:1932289 | Sorcs2    |
| ENSMUST00000044442.9  | 0.530496199 | MGI:1918711 | Ptk7      |
| ENSMUST00000091291.4  | 0.530496199 | MGI:96575   | Insr      |
| ENSMUST00000097373.1  | 0.530496199 | MGI:102548  | Tsc2      |
| ENSMUST00000102849.10 | 0.530496199 | MGI:1921520 | Usp20     |
| ENSMUST00000115657.9  | 0.530496199 | MGI:1298372 | Pcdha11   |
| ENSMUST00000115657.9  | 0.530496199 | MGI:1298372 | Pcdha11   |
| ENSMUST00000115657.9  | 0.530496199 | MGI:1298372 | Pcdha11   |
| ENSMUST00000115657.9  | 0.530496199 | MGI:1298372 | Pcdha11   |
| ENSMUST00000117136.1  | 0.530496199 | MGI:1922845 | Mzt2      |
| ENSMUST00000170819.1  | 0.530496199 | MGI:1922248 | Rab11fip2 |
| ENSMUST00000092907.11 | 0.530553918 | MGI:1915525 | Rpa1      |
| ENSMUST00000102759.7  | 0.532958051 | MGI:1929100 | Stam2     |
| ENSMUST00000004140.10 | 0.534025505 | MGI:95860   | Gstm1     |
| ENSMUST00000022497.14 | 0.534545747 | MGI:1913924 | Spryd7    |
| ENSMUST00000034349.9  | 0.535899662 | MGI:2384561 | Nae1      |
| ENSMUST00000039655.2  | 0.535899662 | MGI:1916092 | Tulp4     |
| ENSMUST00000115099.8  | 0.535899662 | MGI:2442917 | Fam171a1  |
| ENSMUST00000023869.14 | 0.537362286 | MGI:1915434 | Denr      |
| ENSMUST00000008684.10 | 0.53791119  | MGI:1913850 | Mgst1     |
| ENSMUST00000002292.14 | 0.543098243 | MGI:1915727 | Rmnd5a    |
| ENSMUST00000006293.4  | 0.543690037 | MGI:104686  | Crkl      |
| ENSMUST00000020706.4  | 0.543690037 | MGI:99677   | Adcy1     |
| ENSMUST00000022369.8  | 0.543690037 | MGI:98927   | Vcl       |
| ENSMUST00000023088.7  | 0.543690037 | MGI:1261422 | Naga      |

|                       |             |             |          |
|-----------------------|-------------|-------------|----------|
| ENSMUST00000026265.7  | 0.543690037 | MGI:2143311 | Bbs4     |
| ENSMUST00000026902.8  | 0.543690037 | MGI:2179722 | Rassf3   |
| ENSMUST00000051691.7  | 0.543690037 | MGI:103241  | Slk      |
| ENSMUST00000077271.8  | 0.543690037 | MGI:107339  | Gfm1     |
| ENSMUST00000118077.7  | 0.543690037 | MGI:2143698 | Vezt     |
| ENSMUST00000135343.1  | 0.543690037 | MGI:1349455 | Gprin1   |
| ENSMUST00000194558.5  | 0.543690037 | MGI:1100848 | Kpna4    |
| ENSMUST00000023269.4  | 0.547389912 | MGI:1915443 | Rpl24    |
| ENSMUST00000032585.7  | 0.547389912 | MGI:1913411 | Pop4     |
| ENSMUST00000029142.14 | 0.549436567 | MGI:1196288 | Eif6     |
| ENSMUST00000081848.12 | 0.549436567 | MGI:104888  | Fdps     |
| ENSMUST00000113600.9  | 0.549436567 | MGI:105068  | Rab7     |
| ENSMUST00000031377.8  | 0.55154841  | MGI:1196458 | Scarb2   |
| ENSMUST00000119901.8  | 0.552645445 | MGI:104556  | Cdkn1a   |
| ENSMUST00000047857.15 | 0.554243815 | MGI:2152883 | Fbxl5    |
| ENSMUST00000076431.12 | 0.554243815 | MGI:1918568 | Pmpca    |
| ENSMUST00000099571.9  | 0.554243815 | MGI:1316652 | Prmt2    |
| ENSMUST00000115258.8  | 0.554243815 | MGI:1919943 | Zcchc12  |
| ENSMUST00000085092.11 | 0.555060197 | MGI:1929813 | Cacna2d2 |
| ENSMUST00000055518.12 | 0.555380484 | MGI:97583   | Pik3r1   |
| ENSMUST00000025570.7  | 0.559416792 | MGI:1913322 | Sdhaf2   |
| ENSMUST00000004094.14 | 0.560083599 | MGI:1914220 | Ssbp2    |
| ENSMUST00000016463.3  | 0.562570271 | MGI:1353496 | Slc25a5  |
| ENSMUST00000023151.5  | 0.562878083 | MGI:107187  | Bcl6     |
| ENSMUST00000041616.14 | 0.562878083 | MGI:1351869 | Pdxk     |
| ENSMUST00000046122.10 | 0.562878083 | MGI:1914238 | Lap3     |
| ENSMUST00000049245.9  | 0.562878083 | MGI:1343045 | Rbmx11   |
| ENSMUST00000095427.11 | 0.562878083 | MGI:1929261 | Mtch1    |
| ENSMUST00000106000.9  | 0.562878083 | MGI:1096360 | Cd151    |
| ENSMUST00000211765.1  | 0.562878083 | MGI:97388   | Nucb1    |
| ENSMUST00000027432.8  | 0.564431569 | MGI:1917497 | Psmc1    |
| ENSMUST00000002090.2  | 0.565832479 | MGI:1099464 | Ssr4     |
| ENSMUST00000028583.7  | 0.567607445 | MGI:1330839 | Lin7c    |
| ENSMUST00000026560.13 | 0.567800905 | MGI:1345192 | Psmc13   |
| ENSMUST00000087521.12 | 0.568677123 | MGI:1929485 | Nif3l1   |
| ENSMUST00000002923.9  | 0.569308406 | MGI:1098234 | Adprh    |
| ENSMUST00000030134.8  | 0.570072988 | MGI:105128  | Rad23b   |
| ENSMUST00000113200.7  | 0.570072988 | MGI:2684789 | Lrsam1   |
| ENSMUST00000120240.7  | 0.570072988 | MGI:1913290 | Nfu1     |

|                       |             |             |          |
|-----------------------|-------------|-------------|----------|
| ENSMUST00000136872.7  | 0.570072988 | MGI:1929260 | Mtch2    |
| ENSMUST00000092584.5  | 0.572212763 | MGI:96907   | Marcks   |
| ENSMUST00000032196.8  | 0.572380976 | MGI:1914416 | Arl8b    |
| ENSMUST00000029358.14 | 0.575759098 | MGI:2140103 | Nmd3     |
| ENSMUST00000022281.4  | 0.576160828 | MGI:1919448 | Mtrex    |
| ENSMUST00000025714.8  | 0.576160828 | MGI:1859683 | Rpp30    |
| ENSMUST00000160197.5  | 0.576160828 | MGI:1923164 | Exoc6b   |
| ENSMUST00000061372.6  | 0.576849886 | MGI:1298395 | Tspyl1   |
| ENSMUST00000035673.7  | 0.581378906 | MGI:103223  | Vhl      |
| ENSMUST00000088935.3  | 0.581378906 | MGI:2444393 | Zdhhc9   |
| ENSMUST00000153470.8  | 0.581378906 | MGI:96738   | Hikeshi  |
| ENSMUST00000028817.6  | 0.581821315 | MGI:97503   | Pcna     |
| ENSMUST00000007959.13 | 0.581958501 | MGI:1096342 | Rhoa     |
| ENSMUST00000167824.2  | 0.583668235 | MGI:1914545 | Rab3c    |
| ENSMUST00000026841.14 | 0.585901216 | MGI:2136381 | Hadhb    |
| ENSMUST00000059596.7  | 0.585901216 | MGI:2681174 | Eid2     |
| ENSMUST00000078286.5  | 0.585901216 | MGI:1913479 | Rpl7l1   |
| ENSMUST00000099172.4  | 0.585901216 | MGI:109564  | Kif5a    |
| ENSMUST00000074267.4  | 0.586582587 | MGI:1333818 | Rps7     |
| ENSMUST00000030475.2  | 0.586745228 | MGI:1919431 | Nsun4    |
| ENSMUST00000105994.3  | 0.586745228 | MGI:1913835 | Snrnp40  |
| ENSMUST00000063192.14 | 0.587074157 | MGI:3041258 | Tmem150c |
| ENSMUST00000020707.11 | 0.588458728 | MGI:95613   | Gabra1   |
| ENSMUST00000033012.8  | 0.589858237 | MGI:1917599 | Copb1    |
| ENSMUST00000021990.3  | 0.593349739 | MGI:1276575 | Ptdss1   |
| ENSMUST00000023630.15 | 0.593349739 | MGI:1860263 | Psmg1    |
| ENSMUST00000030398.9  | 0.593349739 | MGI:95755   | Slc2a1   |
| ENSMUST00000198518.4  | 0.593349739 | MGI:1861691 | Lgi1     |
| ENSMUST00000239015.1  | 0.594218441 | MGI:1916933 | Emc10    |
| ENSMUST00000098453.8  | 0.596453314 | MGI:1913570 | Tmem208  |
| ENSMUST00000004554.13 | 0.597292144 | MGI:1097682 | Rps5     |
| ENSMUST00000022967.6  | 0.599230218 | MGI:1914748 | Kcnv1    |
| ENSMUST00000102538.10 | 0.601729452 | MGI:108564  | Meis2    |
| ENSMUST00000006912.11 | 0.603990685 | MGI:1298206 | Pip4k2a  |
| ENSMUST00000026173.12 | 0.606046371 | MGI:1914090 | Wdr45b   |
| ENSMUST00000011492.14 | 0.609643871 | MGI:1914272 | Acad9    |
| ENSMUST00000020657.12 | 0.614040918 | MGI:102944  | Ube2b    |
| ENSMUST00000154689.7  | 0.614040918 | MGI:1917338 | Meaf6    |
| ENSMUST00000018122.13 | 0.617695862 | MGI:2443963 | Cadps2   |



|                       |             |             |               |
|-----------------------|-------------|-------------|---------------|
| ENSMUST00000022040.13 | 0.617695862 | MGI:2159437 | Agtppb1       |
| ENSMUST00000024854.8  | 0.617695862 | MGI:1919100 | Clip4         |
| ENSMUST00000040110.7  | 0.617695862 | MGI:1927166 | Chst11        |
| ENSMUST00000042729.15 | 0.617695862 | MGI:2148811 | Npnt          |
| ENSMUST00000058488.8  | 0.617695862 | MGI:1913361 | Tmed3         |
| ENSMUST00000063520.14 | 0.617695862 | MGI:1919367 | Naa50         |
| ENSMUST00000102559.10 | 0.617695862 | MGI:1355329 | Mink1         |
| ENSMUST00000112698.7  | 0.617695862 | MGI:1277212 | Zfp644        |
| ENSMUST00000147663.7  | 0.617695862 | MGI:2389180 | Lrrtm4        |
| ENSMUST00000162280.1  | 0.617695862 | MGI:3057108 | Lhfp14        |
| ENSMUST00000182559.7  | 0.617695862 | MGI:1922665 | Arhgap12      |
| ENSMUST00000189772.1  | 0.617695862 | MGI:5579341 | Gm28635       |
| ENSMUST00000199708.4  | 0.617695862 | MGI:95820   | Grin2a        |
| ENSMUST00000019026.9  | 0.617695862 | MGI:1914286 | Mrpl45        |
| ENSMUST00000029629.14 | 0.617695862 | MGI:1913600 | Pla2g12a      |
| ENSMUST00000034934.14 | 0.617695862 | MGI:3522097 | Aph1b         |
| ENSMUST00000040445.8  | 0.617695862 | MGI:1930964 | Thap11        |
| ENSMUST00000042766.5  | 0.617695862 | MGI:2442111 | Ppm1k         |
| ENSMUST00000057256.4  | 0.617695862 | MGI:1925127 | 6030458C11Rik |
| ENSMUST00000189877.6  | 0.617695862 | MGI:2136810 | Lrfn1         |
| ENSMUST00000007993.15 | 0.617695862 | MGI:2655711 | Rbm28         |
| ENSMUST00000010201.8  | 0.617695862 | MGI:1914482 | Nprl2         |
| ENSMUST00000020523.3  | 0.617695862 | MGI:1919379 | Pex13         |
| ENSMUST00000022767.15 | 0.617695862 | MGI:1927165 | Mettl3        |
| ENSMUST00000025981.14 | 0.617695862 | MGI:1914840 | Tctn3         |
| ENSMUST00000033070.8  | 0.617695862 | MGI:1915023 | Kat8          |
| ENSMUST00000034466.9  | 0.617695862 | MGI:1343460 | Gnpat         |
| ENSMUST00000038434.3  | 0.617695862 | MGI:1917211 | Rpp25l        |
| ENSMUST00000042852.6  | 0.617695862 | MGI:1914000 | Fam210a       |
| ENSMUST00000070797.6  | 0.617695862 | MGI:2150982 | Pcdha1        |
| ENSMUST00000099153.9  | 0.617695862 | MGI:1914370 | Ttc14         |
| ENSMUST00000102780.7  | 0.617695862 | MGI:87979   | Ak4           |
| ENSMUST00000102898.4  | 0.617695862 | MGI:1353472 | Rpl7a         |
| ENSMUST00000111663.8  | 0.617695862 | MGI:1914779 | Fgfr1op2      |
| ENSMUST00000124187.7  | 0.617695862 | MGI:1913546 | Haus2         |
| ENSMUST00000154241.7  | 0.617695862 | MGI:97138   | Mpv17         |
| ENSMUST00000164472.7  | 0.617695862 | MGI:2448537 | Zfp637        |
| ENSMUST00000164822.7  | 0.617695862 | MGI:1917200 | Rcbtb2        |
| ENSMUST00000166176.8  | 0.617695862 | MGI:1336894 | Mocs2         |

|                       |             |             |          |
|-----------------------|-------------|-------------|----------|
| ENSMUST00000178440.7  | 0.617695862 | MGI:1347053 | Git2     |
| ENSMUST00000023615.6  | 0.618579943 | MGI:1206040 | Vps26c   |
| ENSMUST00000001513.7  | 0.621514322 | MGI:1915201 | Tubb6    |
| ENSMUST00000003622.15 | 0.621514322 | MGI:1345283 | Slc25a1  |
| ENSMUST00000025083.13 | 0.621514322 | MGI:1098268 | Kif5b    |
| ENSMUST00000025490.9  | 0.621514322 | MGI:1916106 | Prrc1    |
| ENSMUST00000028852.12 | 0.621514322 | MGI:1924971 | Mrps5    |
| ENSMUST00000048121.12 | 0.621514322 | MGI:2384407 | Myrip    |
| ENSMUST00000051256.9  | 0.621514322 | MGI:1925498 | Armcx1   |
| ENSMUST00000053819.5  | 0.621514322 | MGI:1890577 | Srsf4    |
| ENSMUST00000078752.9  | 0.621514322 | MGI:2443129 | Casc4    |
| ENSMUST00000100487.5  | 0.621514322 | MGI:1353448 | Eif2ak1  |
| ENSMUST00000144458.7  | 0.621514322 | MGI:894652  | Usp10    |
| ENSMUST00000159759.2  | 0.621514322 | MGI:2147598 | Al837181 |
| ENSMUST00000161859.7  | 0.621514322 | MGI:1921382 | Rnf6     |
| ENSMUST00000169172.4  | 0.621514322 | MGI:2445052 | Tbck     |
| ENSMUST00000177962.8  | 0.621514322 | MGI:101917  | Bcap29   |
| ENSMUST00000028117.3  | 0.622081587 | MGI:1351651 | Yme11    |
| ENSMUST00000016138.10 | 0.624507747 | MGI:104683  | Fnta     |
| ENSMUST00000076674.3  | 0.624507747 | MGI:1933206 | Grin3a   |
| ENSMUST00000099087.7  | 0.624507747 | MGI:1928482 | Mbnl1    |
| ENSMUST00000108122.7  | 0.624507747 | MGI:2442298 | Lingo2   |
| ENSMUST00000113245.8  | 0.624507747 | MGI:1929475 | Irak1bp1 |
| ENSMUST00000196817.4  | 0.624507747 | MGI:106028  | Rhoc     |
| ENSMUST00000198878.1  | 0.624507747 | MGI:1915401 | Wls      |
| ENSMUST00000033489.7  | 0.62486502  | MGI:1859607 | Praf2    |
| ENSMUST00000008907.13 | 0.626917462 | MGI:104676  | Man1a2   |
| ENSMUST00000016125.11 | 0.626917462 | MGI:2385336 | Stk32c   |
| ENSMUST00000033761.12 | 0.628899036 | MGI:105942  | Hcfc1    |
| ENSMUST00000094051.5  | 0.628899036 | MGI:3646999 | Gm7324   |
| ENSMUST00000094312.11 | 0.628899036 | MGI:2679262 | Rgma     |
| ENSMUST00000186469.6  | 0.628899036 | MGI:1345629 | Rhof     |
| ENSMUST00000107505.7  | 0.630223339 | MGI:1859547 | Syt11    |
| ENSMUST00000003529.8  | 0.630557263 | MGI:1923988 | Paf1     |
| ENSMUST00000039373.13 | 0.630557263 | MGI:1913894 | Uba6     |
| ENSMUST00000040668.8  | 0.630557263 | MGI:2442832 | Osbp12   |
| ENSMUST00000109574.7  | 0.630557263 | MGI:103010  | Epb41l1  |
| ENSMUST00000122302.7  | 0.630557263 | MGI:98353   | Son      |
| ENSMUST00000055261.10 | 0.631965319 | MGI:2442631 | Mob1a    |

|                       |             |             |               |
|-----------------------|-------------|-------------|---------------|
| ENSMUST00000064196.4  | 0.631965319 | MGI:2147918 | B630019K06Rik |
| ENSMUST00000067512.7  | 0.631965319 | MGI:1927578 | Smpd3         |
| ENSMUST00000064922.6  | 0.633175847 | MGI:96647   | Junb          |
| ENSMUST00000029722.6  | 0.634227688 | MGI:1202063 | Rps3a1        |
| ENSMUST00000062740.14 | 0.635150126 | MGI:87881   | Acp1          |
| ENSMUST00000028105.12 | 0.635965657 | MGI:1914210 | Mindy3        |
| ENSMUST00000141118.8  | 0.635965657 | MGI:87989   | Alas1         |
| ENSMUST00000097522.10 | 0.637342619 | MGI:1924237 | Hdhd2         |
| ENSMUST00000078332.12 | 0.638460472 | MGI:1922984 | Mff           |
| ENSMUST00000031530.8  | 0.638944061 | MGI:1891433 | Sppl3         |
| ENSMUST00000021090.13 | 0.642130858 | MGI:95805   | Grb2          |
| ENSMUST00000082429.6  | 0.642130858 | MGI:104887  | Gpx1          |
| ENSMUST00000029635.13 | 0.642913367 | MGI:1860604 | Gucy1b1       |
| ENSMUST00000021497.15 | 0.64419671  | MGI:1933947 | Rtn1          |
| ENSMUST00000151786.7  | 0.656111882 | MGI:1914051 | Prkrip1       |
| ENSMUST00000192538.1  | 0.656310082 | MGI:3642386 | Gm9774        |
| ENSMUST00000093962.4  | 0.662014955 | MGI:88313   | Ccnd1         |
| ENSMUST00000042497.13 | 0.671108281 | MGI:107851  | Ndufv1        |
| ENSMUST00000153983.7  | 0.673242699 | MGI:1915822 | Mrpl58        |
| ENSMUST00000120128.7  | 0.674474045 | MGI:2441950 | Adgrl3        |
| ENSMUST00000147196.2  | 0.675838468 | MGI:1915101 | Mtres1        |
| ENSMUST00000089759.8  | 0.679008431 | MGI:1919161 | Bdh1          |
| ENSMUST00000024047.11 | 0.679063298 | MGI:1346078 | Twf2          |
| ENSMUST00000043937.8  | 0.680545536 | MGI:1913607 | Ostc          |
| ENSMUST00000109604.8  | 0.680987683 | MGI:1922960 | Rbm12         |
| ENSMUST00000032138.14 | 0.681475294 | MGI:88431   | Cnbp          |
| ENSMUST00000000756.5  | 0.683171993 | MGI:105922  | Rpl13         |
| ENSMUST00000087204.8  | 0.685691398 | MGI:2443895 | Fry           |
| ENSMUST00000168536.8  | 0.685691398 | MGI:2178563 | Nt5c2         |
| ENSMUST00000040914.2  | 0.686283194 | MGI:1931526 | H1f2          |
| ENSMUST00000027991.11 | 0.687450289 | MGI:108409  | Rgs4          |
| ENSMUST00000032809.9  | 0.688607471 | MGI:1924504 | Yif1b         |
| ENSMUST00000040383.8  | 0.688607471 | MGI:2384831 | Cc2d1a        |
| ENSMUST00000065103.3  | 0.688607471 | MGI:1913473 | Mrpl35        |
| ENSMUST00000140485.7  | 0.688607471 | MGI:1924550 | Raph1         |
| ENSMUST00000041551.8  | 0.688693289 | MGI:1914189 | Aagab         |
| ENSMUST00000190686.6  | 0.690019848 | MGI:1923206 | Srrm2         |
| ENSMUST00000037349.7  | 0.691438684 | MGI:1349419 | Aifm1         |
| ENSMUST00000022696.7  | 0.69203047  | MGI:1929705 | Xpo7          |

|                       |             |             |          |
|-----------------------|-------------|-------------|----------|
| ENSMUST00000049263.8  | 0.69203047  | MGI:1913910 | Sltm     |
| ENSMUST00000097715.3  | 0.69203047  | MGI:2137229 | Mrpl43   |
| ENSMUST00000166082.7  | 0.69203047  | MGI:1915288 | Chid1    |
| ENSMUST00000033139.14 | 0.696105178 | MGI:1333870 | Ate1     |
| ENSMUST00000071739.11 | 0.696105178 | MGI:2152453 | Gsk3a    |
| ENSMUST00000103018.10 | 0.696105178 | MGI:1919305 | Slc38a10 |
| ENSMUST00000103201.7  | 0.696105178 | MGI:108451  | Acaca    |
| ENSMUST00000170672.8  | 0.696105178 | MGI:1919805 | Shisa9   |
| ENSMUST00000038757.7  | 0.696356377 | MGI:2146027 | Csdc2    |
| ENSMUST00000034046.12 | 0.698260529 | MGI:102797  | Acs1     |
| ENSMUST00000042493.9  | 0.698260529 | MGI:1916918 | Ccdc115  |
| ENSMUST00000022980.4  | 0.700325029 | MGI:1913468 | Ndufb9   |
| ENSMUST00000032451.8  | 0.701037318 | MGI:95630   | Slc6a11  |
| ENSMUST00000047479.2  | 0.701037318 | MGI:1891443 | Pcdhac2  |
| ENSMUST00000106882.8  | 0.701037318 | MGI:1920344 | Sgip1    |
| ENSMUST00000109331.8  | 0.701037318 | MGI:2154239 | Plxnb2   |
| ENSMUST00000124992.7  | 0.701037318 | MGI:1926245 | Ube2j1   |
| ENSMUST00000028892.10 | 0.701523185 | MGI:2158650 | Idh3b    |
| ENSMUST00000023759.5  | 0.707129395 | MGI:1933623 | Smarcd1  |
| ENSMUST00000031391.8  | 0.707129395 | MGI:1924295 | Bcl7a    |
| ENSMUST00000036884.2  | 0.707129395 | MGI:1333856 | Klf9     |
| ENSMUST00000049811.7  | 0.707129395 | MGI:2147298 | Cep120   |
| ENSMUST00000065496.11 | 0.707129395 | MGI:2445175 | Arhgap20 |
| ENSMUST00000071592.11 | 0.707129395 | MGI:2384879 | Prmt7    |
| ENSMUST00000073089.12 | 0.707129395 | MGI:1924567 | Miga1    |
| ENSMUST00000080751.8  | 0.707129395 | MGI:1919551 | Shisal1  |
| ENSMUST00000081851.3  | 0.707129395 | MGI:1861735 | Tmeff2   |
| ENSMUST00000165684.7  | 0.707129395 | MGI:2158394 | Med16    |
| ENSMUST00000210780.1  | 0.707129395 | MGI:1330284 | Slc16a7  |
| ENSMUST00000102659.1  | 0.707712486 | MGI:1916262 | Sestd1   |
| ENSMUST00000108081.8  | 0.71067373  | MGI:2387356 | Ggnbp2   |
| ENSMUST00000067646.11 | 0.713950869 | MGI:1339973 | Ilf3     |
| ENSMUST00000034164.5  | 0.714845206 | MGI:1919205 | Ist1     |
| ENSMUST00000046022.15 | 0.714845206 | MGI:1099835 | Skiv2l   |
| ENSMUST00000111432.9  | 0.714845206 | MGI:1344382 | Creg1    |
| ENSMUST00000115096.3  | 0.714845206 | MGI:2179061 | Plxna4   |
| ENSMUST00000131446.7  | 0.714845206 | MGI:1924182 | Arfip2   |
| ENSMUST00000198965.4  | 0.714845206 | MGI:106484  | Rufy3    |
| ENSMUST00000005583.11 | 0.714845206 | MGI:108414  | Pafah1b3 |

|                       |             |             |               |
|-----------------------|-------------|-------------|---------------|
| ENSMUST00000015855.7  | 0.714845206 | MGI:1925152 | Prune1        |
| ENSMUST00000033127.11 | 0.714845206 | MGI:1351630 | Sergef        |
| ENSMUST00000040421.10 | 0.714845206 | MGI:1098643 | Coq5          |
| ENSMUST00000043990.13 | 0.714845206 | MGI:2142951 | Edc3          |
| ENSMUST00000051937.8  | 0.714845206 | MGI:1916189 | Rasl11b       |
| ENSMUST00000061334.9  | 0.714845206 | MGI:2444136 | Mars2         |
| ENSMUST00000072751.12 | 0.714845206 | MGI:1915964 | Dohh          |
| ENSMUST00000085684.10 | 0.714845206 | MGI:1923038 | Smurf1        |
| ENSMUST00000101499.9  | 0.714845206 | MGI:2144842 | Cbll1         |
| ENSMUST00000105230.3  | 0.714845206 | MGI:1913368 | Sarnp         |
| ENSMUST00000105686.2  | 0.714845206 | MGI:1917806 | Slc25a33      |
| ENSMUST00000107168.7  | 0.714845206 | MGI:1328354 | Mpp3          |
| ENSMUST00000107456.3  | 0.714845206 | MGI:3698178 | Fam174b       |
| ENSMUST00000114102.9  | 0.714845206 | MGI:1915362 | Entr1         |
| ENSMUST00000193117.2  | 0.714845206 | MGI:1924147 | Raly1         |
| ENSMUST00000203187.2  | 0.714845206 | MGI:1921991 | C2cd5         |
| ENSMUST00000004565.14 | 0.714845206 | MGI:1927244 | Ralb          |
| ENSMUST00000010049.5  | 0.714845206 | MGI:1918000 | Kdsr          |
| ENSMUST00000020551.12 | 0.714845206 | MGI:1929749 | Asb3          |
| ENSMUST00000027688.14 | 0.714845206 | MGI:1926375 | Rassf5        |
| ENSMUST00000033973.13 | 0.714845206 | MGI:2681000 | Rwdd4a        |
| ENSMUST00000036807.12 | 0.714845206 | MGI:1921004 | Thap1         |
| ENSMUST00000054471.9  | 0.714845206 | MGI:1921197 | 4930430F08Rik |
| ENSMUST00000067167.5  | 0.714845206 | MGI:1917817 | Fra10ac1      |
| ENSMUST00000091636.4  | 0.714845206 | MGI:2389174 | Lrrtm2        |
| ENSMUST00000111289.7  | 0.714845206 | MGI:1350916 | Nit1          |
| ENSMUST00000114846.8  | 0.714845206 | MGI:2181202 | Pfkfb3        |
| ENSMUST00000180180.7  | 0.714845206 | MGI:1349469 | Ecsit         |
| ENSMUST00000182625.1  | 0.714845206 | MGI:98360   | Sox12         |
| ENSMUST00000119197.7  | 0.717597309 | MGI:108117  | Emd           |
| ENSMUST00000108409.1  | 0.718335022 | MGI:3607779 | Tmem145       |
| ENSMUST00000026328.10 | 0.721679217 | MGI:1859815 | Prdx4         |
| ENSMUST00000082373.7  | 0.721679217 | MGI:1889615 | Luzp2         |
| ENSMUST00000035560.8  | 0.723652068 | MGI:1919732 | Acbd6         |
| ENSMUST00000032998.12 | 0.725362689 | MGI:1350917 | Rps3          |
| ENSMUST00000200109.4  | 0.729855662 | MGI:2444812 | Camkk2        |
| ENSMUST00000033131.11 | 0.731503874 | MGI:1913758 | Lamtor1       |
| ENSMUST00000142407.7  | 0.731503874 | MGI:1858216 | Ube2k         |
| ENSMUST00000179619.8  | 0.73336224  | MGI:1340051 | Adgrg1        |

|                       |             |             |           |
|-----------------------|-------------|-------------|-----------|
| ENSMUST00000022504.11 | 0.73748834  | MGI:1346861 | Mapk8     |
| ENSMUST00000081775.11 | 0.740054972 | MGI:99421   | Nfe2l1    |
| ENSMUST00000165532.2  | 0.740196849 | MGI:1914365 | Rpl14     |
| ENSMUST00000053063.6  | 0.74137788  | MGI:2385923 | Hexim1    |
| ENSMUST00000064989.11 | 0.743271651 | MGI:97596   | Prkcb     |
| ENSMUST00000030464.13 | 0.744411963 | MGI:109277  | Pik3r3    |
| ENSMUST00000041022.14 | 0.744411963 | MGI:2673000 | Trim46    |
| ENSMUST00000036049.5  | 0.745987292 | MGI:1919802 | Hsd1l     |
| ENSMUST00000026538.12 | 0.751082295 | MGI:2136460 | Echs1     |
| ENSMUST00000049488.8  | 0.751082295 | MGI:2444223 | Serinc5   |
| ENSMUST00000103181.10 | 0.751082295 | MGI:1332236 | Cds2      |
| ENSMUST00000026289.9  | 0.752514746 | MGI:1333871 | Hsd17b10  |
| ENSMUST00000034547.5  | 0.754634082 | MGI:87870   | Acat1     |
| ENSMUST00000090243.7  | 0.756743928 | MGI:1919394 | Slc37a3   |
| ENSMUST00000078034.4  | 0.762118689 | MGI:3642682 | Rpl9-ps6  |
| ENSMUST00000015391.9  | 0.762126131 | MGI:1913786 | Nipsnap3b |
| ENSMUST00000017629.11 | 0.762126131 | MGI:98791   | Top2b     |
| ENSMUST00000027534.12 | 0.762126131 | MGI:1914694 | Ilkap     |
| ENSMUST00000038217.13 | 0.762126131 | MGI:2135752 | Dtx3      |
| ENSMUST00000040504.11 | 0.762126131 | MGI:2442829 | Klhl4     |
| ENSMUST00000056888.12 | 0.762126131 | MGI:1915673 | Ankrd13d  |
| ENSMUST00000090682.3  | 0.762126131 | MGI:1914386 | Kbtbd4    |
| ENSMUST00000109468.2  | 0.762126131 | MGI:98788   | Top1      |
| ENSMUST00000115628.9  | 0.762126131 | MGI:101825  | Tango2    |
| ENSMUST00000036376.12 | 0.763072333 | MGI:1919303 | Tmub2     |
| ENSMUST00000023405.15 | 0.763762249 | MGI:1927136 | Arl6      |
| ENSMUST00000096229.10 | 0.764435913 | MGI:1921256 | Dnm1l     |
| ENSMUST00000022629.8  | 0.770192744 | MGI:1349763 | Dpysl2    |
| ENSMUST00000102981.9  | 0.770192744 | MGI:1931071 | Sec61a2   |
| ENSMUST00000115436.8  | 0.770192744 | MGI:1309489 | Cask      |
| ENSMUST00000025711.12 | 0.773710966 | MGI:1915755 | Vps51     |
| ENSMUST00000029804.12 | 0.773710966 | MGI:1922874 | Metap1    |
| ENSMUST00000031002.9  | 0.773710966 | MGI:1195262 | Man2b2    |
| ENSMUST00000057692.10 | 0.773710966 | MGI:2183260 | Luc7l2    |
| ENSMUST00000068999.13 | 0.773710966 | MGI:1925756 | Micu3     |
| ENSMUST00000090275.4  | 0.773710966 | MGI:1334209 | Gjd2      |
| ENSMUST00000023455.13 | 0.778263868 | MGI:2447857 | Ppil2     |
| ENSMUST00000030501.14 | 0.778263868 | MGI:1916322 | Ebna1bp2  |
| ENSMUST00000068755.13 | 0.780457078 | MGI:1917487 | Bhlhb9    |

|                       |             |             |               |
|-----------------------|-------------|-------------|---------------|
| ENSMUST00000102594.10 | 0.780457078 | MGI:1915079 | 1110051M20Rik |
| ENSMUST00000055647.14 | 0.783199576 | MGI:108426  | Kif1b         |
| ENSMUST00000151120.8  | 0.787489894 | MGI:88562   | Ctsd          |
| ENSMUST00000149565.7  | 0.787947104 | MGI:1196345 | Agpat5        |
| ENSMUST00000160899.7  | 0.787947104 | MGI:1924148 | B3gat1        |
| ENSMUST00000163483.1  | 0.791887939 | MGI:97842   | Rab1a         |
| ENSMUST00000094280.3  | 0.796699424 | MGI:1261428 | Chchd2        |
| ENSMUST00000042096.14 | 0.803310868 | MGI:2443696 | Emc1          |
| ENSMUST00000187810.1  | 0.803310868 | MGI:2445172 | Arl4c         |
| ENSMUST00000022007.7  | 0.805863329 | MGI:1916565 | 1700001L19Rik |
| ENSMUST00000040873.11 | 0.805863329 | MGI:1933527 | Srrt          |
| ENSMUST00000048937.5  | 0.805863329 | MGI:2685031 | Leo1          |
| ENSMUST00000090678.10 | 0.805863329 | MGI:97852   | Rap1a         |
| ENSMUST00000099078.9  | 0.805863329 | MGI:2139354 | Arfgef2       |
| ENSMUST00000238932.1  | 0.805863329 | MGI:108090  | Ei24          |
| ENSMUST00000004622.6  | 0.805863329 | MGI:1333854 | Gab2          |
| ENSMUST00000019183.13 | 0.805863329 | MGI:1915039 | Dalrd3        |
| ENSMUST00000021380.9  | 0.805863329 | MGI:1925482 | Trappc6b      |
| ENSMUST00000030724.8  | 0.805863329 | MGI:2651874 | Sesn2         |
| ENSMUST00000050063.8  | 0.805863329 | MGI:99435   | Arf6          |
| ENSMUST00000068140.5  | 0.805863329 | MGI:1919559 | Tmem158       |
| ENSMUST00000072857.12 | 0.805863329 | MGI:2443446 | Scfd2         |
| ENSMUST00000094695.11 | 0.805863329 | MGI:1915059 | Rmdn3         |
| ENSMUST00000109728.7  | 0.805863329 | MGI:101772  | Snta1         |
| ENSMUST00000167140.7  | 0.805863329 | MGI:2179733 | Mpst          |
| ENSMUST00000168727.2  | 0.805863329 | MGI:95684   | Gdf10         |
| ENSMUST00000203633.2  | 0.805863329 | MGI:5753809 | Etfbl         |
| ENSMUST00000032191.15 | 0.805863329 | MGI:1889844 | Sumf1         |
| ENSMUST00000033289.5  | 0.805863329 | MGI:107476  | Stim1         |
| ENSMUST00000037399.15 | 0.805863329 | MGI:2385271 | Blvrb         |
| ENSMUST00000041126.8  | 0.805863329 | MGI:2444061 | Ss18l1        |
| ENSMUST00000046461.8  | 0.805863329 | MGI:2148865 | Dok4          |
| ENSMUST00000057608.4  | 0.805863329 | MGI:2447899 | Lrrc3         |
| ENSMUST00000059438.10 | 0.805863329 | MGI:1915527 | 2310057M21Rik |
| ENSMUST00000061850.4  | 0.805863329 | MGI:1921903 | Pomk          |
| ENSMUST00000068457.14 | 0.805863329 | MGI:1917029 | Pphln1        |
| ENSMUST00000115658.5  | 0.805863329 | MGI:1298372 | Pcdha11       |
| ENSMUST00000115658.5  | 0.805863329 | MGI:1298372 | Pcdha11       |
| ENSMUST00000115658.5  | 0.805863329 | MGI:1298372 | Pcdha11       |

|                       |             |             |         |
|-----------------------|-------------|-------------|---------|
| ENSMUST00000115658.5  | 0.805863329 | MGI:1298372 | Pcdha11 |
| ENSMUST00000120943.7  | 0.805863329 | MGI:1891471 | Spsb3   |
| ENSMUST00000027727.14 | 0.810564953 | MGI:1919924 | Adipor1 |
| ENSMUST00000159062.7  | 0.810564953 | MGI:1261912 | Fbxo41  |
| ENSMUST00000193414.1  | 0.810564953 | MGI:1935217 | Pcdhga5 |
| ENSMUST00000128764.8  | 0.812808662 | MGI:1277978 | Sap18   |
| ENSMUST00000057625.2  | 0.813683709 | MGI:1923469 | Arxes1  |
| ENSMUST00000027256.11 | 0.816400482 | MGI:1333820 | Mrpl30  |
| ENSMUST00000159626.7  | 0.822595542 | MGI:88275   | Ctnna2  |
| ENSMUST00000212864.1  | 0.822595542 | MGI:3708786 | Gm10358 |
| ENSMUST00000051416.11 | 0.823555758 | MGI:2153181 | Hnmt    |
| ENSMUST00000046565.12 | 0.825257565 | MGI:1097716 | Arx     |
| ENSMUST00000116584.1  | 0.825257565 | MGI:1351620 | Mrpl39  |
| ENSMUST00000163134.7  | 0.825257565 | MGI:1096389 | Nrxn3   |
| ENSMUST00000100314.3  | 0.835816366 | MGI:1913101 | Cldn10  |
| ENSMUST00000192227.5  | 0.835816366 | MGI:1346089 | Rgs7    |
| ENSMUST00000027921.10 | 0.842898682 | MGI:1919586 | Iars2   |
| ENSMUST00000113711.2  | 0.842898682 | MGI:1919070 | Wdr34   |
| ENSMUST00000131552.4  | 0.842898682 | MGI:97613   | Plcb1   |
| ENSMUST00000132855.7  | 0.842898682 | MGI:3044681 | Wipf3   |
| ENSMUST00000142129.7  | 0.842898682 | MGI:107434  | Cdh8    |
| ENSMUST00000032732.14 | 0.849934983 | MGI:1261791 | Apba2   |
| ENSMUST00000033873.8  | 0.850348109 | MGI:2387215 | Erlin2  |
| ENSMUST00000109075.7  | 0.864476675 | MGI:1926424 | Nelfcd  |
| ENSMUST00000056149.14 | 0.866369445 | MGI:1923442 | Abhd12  |
| ENSMUST00000058210.12 | 0.867468929 | MGI:104684  | Eps8    |
| ENSMUST00000016143.8  | 0.880569889 | MGI:2658986 | Wasf3   |
| ENSMUST00000025270.7  | 0.885741841 | MGI:1914128 | Riok3   |
| ENSMUST00000087511.9  | 0.885741841 | MGI:1913559 | Tmem128 |
| ENSMUST00000022038.14 | 0.888058393 | MGI:1925939 | Naa35   |
| ENSMUST00000092678.9  | 0.890730723 | MGI:1917580 | Bclaf1  |
| ENSMUST00000003911.12 | 0.891478401 | MGI:105126  | Rad23a  |
| ENSMUST00000005620.9  | 0.891478401 | MGI:1931874 | Dnajb1  |
| ENSMUST00000015239.9  | 0.891478401 | MGI:1354731 | Fbxw5   |
| ENSMUST00000026927.9  | 0.891478401 | MGI:1858232 | Nudt5   |
| ENSMUST00000029771.12 | 0.891478401 | MGI:88381   | F3      |
| ENSMUST00000034226.7  | 0.891478401 | MGI:1919637 | Fam192a |
| ENSMUST00000057907.9  | 0.891478401 | MGI:1354744 | Fbxo44  |
| ENSMUST00000092891.5  | 0.891478401 | MGI:1932374 | Cacng7  |



|                       |             |             |               |
|-----------------------|-------------|-------------|---------------|
| ENSMUST00000171155.3  | 0.891478401 | MGI:2668031 | Klh25         |
| ENSMUST00000002259.12 | 0.891478401 | MGI:107472  | Clgn          |
| ENSMUST00000015725.15 | 0.891478401 | MGI:109328  | Bnip1         |
| ENSMUST00000023535.3  | 0.891478401 | MGI:2443764 | lqcb1         |
| ENSMUST00000040241.14 | 0.891478401 | MGI:2148251 | Ddx19b        |
| ENSMUST00000041208.8  | 0.891478401 | MGI:2443767 | Aaas          |
| ENSMUST00000044155.14 | 0.891478401 | MGI:1920078 | Ubash3b       |
| ENSMUST00000044825.4  | 0.891478401 | MGI:1916737 | Ndufaf5       |
| ENSMUST00000066148.11 | 0.891478401 | MGI:1925543 | Tbcel         |
| ENSMUST00000091459.11 | 0.891478401 | MGI:1915925 | Fam172a       |
| ENSMUST00000093253.9  | 0.891478401 | MGI:2445069 | Ccdc85a       |
| ENSMUST00000111913.8  | 0.891478401 | MGI:2385108 | Odr4          |
| ENSMUST00000139049.1  | 0.891478401 | MGI:3779453 | Prps13        |
| ENSMUST00000190997.6  | 0.891478401 | MGI:1918367 | Rbbp5         |
| ENSMUST00000022030.10 | 0.910647128 | MGI:1913921 | Ccnh          |
| ENSMUST00000042594.12 | 0.910978262 | MGI:2157910 | Mlc1          |
| ENSMUST00000061437.4  | 0.923765209 | MGI:1929289 | Adrm1         |
| ENSMUST00000030606.13 | 0.935491182 | MGI:1858220 | Rcan3         |
| ENSMUST00000121646.7  | 0.943792048 | MGI:1100874 | Plagl1        |
| ENSMUST00000063882.11 | 0.94826301  | MGI:2140972 | Dcun1d4       |
| ENSMUST00000020896.16 | 0.951477965 | MGI:1913359 | Tspan13       |
| ENSMUST00000214685.1  | 0.971438081 | MGI:98373   | Sparc         |
| ENSMUST00000084941.11 | 0.971511669 | MGI:107978  | Klc1          |
| ENSMUST00000025050.12 | 0.971781422 | MGI:1928484 | Nudt3         |
| ENSMUST00000032887.3  | 0.971781422 | MGI:107207  | Coq7          |
| ENSMUST00000079510.5  | 0.971892466 | MGI:106417  | Cherp         |
| ENSMUST00000116380.8  | 0.971892466 | MGI:98085   | Rpn2          |
| ENSMUST00000028592.11 | 0.97229611  | MGI:1351744 | Eif3m         |
| ENSMUST00000031805.10 | 0.97229611  | MGI:1926187 | Avl9          |
| ENSMUST00000026990.5  | 0.97229611  | MGI:1920916 | Thoc3         |
| ENSMUST00000027357.11 | 0.97229611  | MGI:1890215 | Rnf25         |
| ENSMUST00000041459.8  | 0.97229611  | MGI:1929280 | Cyb561d2      |
| ENSMUST00000043050.8  | 0.97229611  | MGI:1929064 | Chst12        |
| ENSMUST00000058393.8  | 0.97229611  | MGI:2140680 | A430005L14Rik |
| ENSMUST00000062962.11 | 0.97229611  | MGI:1922169 | Slc35f6       |
| ENSMUST00000148960.7  | 0.97229611  | MGI:1914518 | Myl12a        |
| ENSMUST00000002925.5  | 0.97229611  | MGI:1922139 | Timmdc1       |
| ENSMUST00000030842.7  | 0.97229611  | MGI:1916401 | Lzic          |
| ENSMUST00000049281.11 | 0.97229611  | MGI:1913556 | Fam53c        |

|                       |             |             |               |
|-----------------------|-------------|-------------|---------------|
| ENSMUST00000064272.9  | 0.97229611  | MGI:1928767 | B4galt3       |
| ENSMUST00000183952.1  | 0.97229611  | MGI:1917634 | Tmem185b      |
| ENSMUST00000034147.3  | 0.99959654  | MGI:1353574 | Zfp330        |
| ENSMUST00000029968.13 | 1.006338039 | MGI:1923596 | Rars2         |
| ENSMUST00000074575.10 | 1.012805601 | MGI:98341   | Snrnp70       |
| ENSMUST00000038874.11 | 1.02189402  | MGI:2443716 | Scai          |
| ENSMUST00000057885.12 | 1.038255422 | MGI:1298373 | Rpl9          |
| ENSMUST00000007005.13 | 1.039024572 | MGI:87871   | Acat2         |
| ENSMUST00000020284.4  | 1.048825681 | MGI:1919017 | Tysnd1        |
| ENSMUST00000028915.5  | 1.048825681 | MGI:1347074 | Rbbp9         |
| ENSMUST00000028928.7  | 1.048825681 | MGI:1921783 | Gzf1          |
| ENSMUST00000100404.5  | 1.048825681 | MGI:2685903 | B3glct        |
| ENSMUST00000116279.9  | 1.048825681 | MGI:1924074 | Mtfr1l        |
| ENSMUST00000020949.11 | 1.048825681 | MGI:1346870 | Map2k6        |
| ENSMUST00000058787.8  | 1.048825681 | MGI:95748   | Glr2          |
| ENSMUST00000183309.7  | 1.048825681 | MGI:1914489 | Rpf2          |
| ENSMUST00000093290.11 | 1.050464251 | MGI:1914495 | Peli1         |
| ENSMUST00000006669.5  | 1.053322619 | MGI:1926119 | Pdk1          |
| ENSMUST00000114086.7  | 1.055790457 | MGI:1935151 | Klf7          |
| ENSMUST00000039449.8  | 1.068160839 | MGI:1926163 | Ltn1          |
| ENSMUST00000020234.13 | 1.070220492 | MGI:98754   | Timp3         |
| ENSMUST00000040519.11 | 1.072358991 | MGI:1915270 | Apopt1        |
| ENSMUST00000025541.5  | 1.084228065 | MGI:95776   | Gnaq          |
| ENSMUST00000015100.14 | 1.087190724 | MGI:104871  | Ppp1cb        |
| ENSMUST00000070733.8  | 1.090585552 | MGI:107418  | Ptprn2        |
| ENSMUST00000041331.3  | 1.098071539 | MGI:98239   | Scd1          |
| ENSMUST00000036561.7  | 1.121499329 | MGI:1914811 | Wdr48         |
| ENSMUST00000008579.13 | 1.121499329 | MGI:1918732 | Rdh13         |
| ENSMUST00000047749.6  | 1.121499329 | MGI:1913964 | 4921524J17Rik |
| ENSMUST00000044705.11 | 1.121499329 | MGI:1914525 | Vstm2b        |
| ENSMUST00000105111.3  | 1.121499329 | MGI:95474   | F8a           |
| ENSMUST00000161807.7  | 1.121499329 | MGI:1096365 | Psme2         |
| ENSMUST00000059018.13 | 1.132200685 | MGI:1354708 | Fbxo31        |
| ENSMUST00000029915.5  | 1.135490426 | MGI:1924282 | Tstd3         |
| ENSMUST00000025875.4  | 1.139165632 | MGI:105083  | Slc1a1        |
| ENSMUST00000116621.1  | 1.143037034 | MGI:1349919 | Ndufb11       |
| ENSMUST00000076605.8  | 1.148479188 | MGI:95774   | Gnal          |
| ENSMUST00000017945.14 | 1.190687045 | MGI:108398  | Mlx           |
| ENSMUST00000077977.13 | 1.190687045 | MGI:1922035 | Miga2         |

|                       |             |             |          |
|-----------------------|-------------|-------------|----------|
| ENSMUST00000089049.3  | 1.190687045 | MGI:2385853 | Nudt18   |
| ENSMUST00000100220.4  | 1.190687045 | MGI:106544  | Spout1   |
| ENSMUST00000109191.1  | 1.190687045 | MGI:3616086 | Kcng1    |
| ENSMUST00000200680.3  | 1.190687045 | MGI:1917036 | Tprkb    |
| ENSMUST00000020529.12 | 1.190687045 | MGI:1916133 | Ahsa2    |
| ENSMUST00000027380.11 | 1.190687045 | MGI:2442781 | Tmem169  |
| ENSMUST00000027601.10 | 1.190687045 | MGI:1298227 | Mcm6     |
| ENSMUST00000032635.13 | 1.190687045 | MGI:1913918 | Nipa2    |
| ENSMUST00000040416.7  | 1.190687045 | MGI:99526   | Ddx19a   |
| ENSMUST00000084650.5  | 1.190687045 | MGI:2685341 | Gpr139   |
| ENSMUST00000183404.7  | 1.190687045 | MGI:101877  | Tcf12    |
| ENSMUST00000078803.4  | 1.208475635 | MGI:1914164 | Vps28    |
| ENSMUST00000028137.9  | 1.256707997 | MGI:1098826 | Coq4     |
| ENSMUST00000034060.6  | 1.256707997 | MGI:1913066 | Sh3rf1   |
| ENSMUST00000037796.13 | 1.256707997 | MGI:1916330 | Gmppa    |
| ENSMUST00000055322.5  | 1.256707997 | MGI:1337072 | Ier5     |
| ENSMUST00000087614.10 | 1.256707997 | MGI:1338038 | Aebp2    |
| ENSMUST00000102657.9  | 1.256707997 | MGI:1351471 | B9d1     |
| ENSMUST00000114848.7  | 1.256707997 | MGI:1916026 | Taf11    |
| ENSMUST00000027153.5  | 1.256707997 | MGI:87866   | Acadl    |
| ENSMUST00000031311.9  | 1.256707997 | MGI:102726  | Dck      |
| ENSMUST00000031845.12 | 1.256707997 | MGI:1889850 | Gsdme    |
| ENSMUST00000108567.8  | 1.256707997 | MGI:1923365 | Zfp444   |
| ENSMUST00000185675.6  | 1.256707997 | MGI:2136405 | Glce     |
| ENSMUST00000041782.3  | 1.319839432 | MGI:1353636 | Abt1     |
| ENSMUST00000055458.5  | 1.319839432 | MGI:1929744 | Cdc42ep2 |
| ENSMUST00000069195.4  | 1.319839432 | MGI:99192   | Zfp46    |
| ENSMUST00000025885.5  | 1.319839432 | MGI:1913482 | ZnrD2    |
| ENSMUST00000034539.11 | 1.319839432 | MGI:1916555 | Dcps     |
| ENSMUST00000160439.7  | 1.319839432 | MGI:1916068 | Zfand2b  |
| ENSMUST00000163048.7  | 1.319839432 | MGI:1289274 | Krr1     |
| ENSMUST00000210564.2  | 1.319839432 | MGI:1914314 | Chmp1b   |
| ENSMUST00000050148.4  | 1.339412642 | MGI:1914322 | Cdc37l1  |
| ENSMUST00000061457.6  | 1.350241091 | MGI:2386852 | Csrnp2   |
| ENSMUST00000025236.8  | 1.369579737 | MGI:2156764 | Stard4   |
| ENSMUST00000020692.6  | 1.380323708 | MGI:108384  | Btg2     |
| ENSMUST00000026988.10 | 1.380323708 | MGI:1930788 | Arl10    |
| ENSMUST00000095517.11 | 1.380323708 | MGI:2142885 | Cog8     |
| ENSMUST00000227920.1  | 1.380323708 | MGI:1101353 | Klf10    |

|                       |             |             |               |
|-----------------------|-------------|-------------|---------------|
| ENSMUST00000034560.13 | 1.380323708 | MGI:1920949 | Ppp2r1b       |
| ENSMUST00000057942.3  | 1.380323708 | MGI:99457   | Mc4r          |
| ENSMUST00000117513.7  | 1.380323708 | MGI:1918529 | Slc29a3       |
| ENSMUST00000168503.7  | 1.380323708 | MGI:1354743 | Fbxo6         |
| ENSMUST00000085984.10 | 1.438373915 | MGI:1913388 | Bud23         |
| ENSMUST00000036003.7  | 1.438373915 | MGI:2444786 | Klhl42        |
| ENSMUST00000054555.9  | 1.438373915 | MGI:99186   | Zfp41         |
| ENSMUST00000109910.8  | 1.438373915 | MGI:97307   | Nf2           |
| ENSMUST00000171031.7  | 1.438373915 | MGI:88315   | Ccnd3         |
| ENSMUST00000015920.11 | 1.494178407 | MGI:98446   | Med22         |
| ENSMUST00000033098.15 | 1.547904486 | MGI:1276534 | Bcat2         |
| ENSMUST00000035983.11 | 1.547904486 | MGI:1278340 | Rpl21         |
| ENSMUST00000084743.6  | 1.560440442 | MGI:2143424 | Pomgnt2       |
| ENSMUST00000029158.3  | 1.599701427 | MGI:1915545 | Aar2          |
| ENSMUST00000169282.7  | 1.599701427 | MGI:1915568 | Aph1c         |
| ENSMUST00000177963.7  | 1.599701427 | MGI:1918849 | Senp8         |
| ENSMUST00000037048.8  | 1.604212544 | MGI:1922354 | Mmd2          |
| ENSMUST00000098242.3  | 1.649702982 | MGI:1329035 | Ggh           |
| ENSMUST00000177567.7  | 1.649702982 | MGI:1923507 | Slc38a3       |
| ENSMUST00000191251.6  | 1.649702982 | MGI:1917625 | Ica1l         |
| ENSMUST00000030018.4  | 1.649702982 | MGI:2149820 | Nans          |
| ENSMUST00000032480.13 | 1.649702982 | MGI:107307  | Ing4          |
| ENSMUST00000102922.9  | 1.649702982 | MGI:1097163 | Pold2         |
| ENSMUST00000103217.10 | 1.698029454 | MGI:1927868 | Pex14         |
| ENSMUST00000105038.2  | 1.698029454 | MGI:3781727 | Gm3550        |
| ENSMUST00000038830.9  | 1.698029454 | MGI:1913456 | 1110059E24Rik |
| ENSMUST00000060108.6  | 1.698029454 | MGI:1916405 | 1810030O07Rik |
| ENSMUST00000097961.8  | 1.698029454 | MGI:2444031 | Alg6          |
| ENSMUST00000088248.12 | 1.744789448 | MGI:1915862 | Ube2c         |
| ENSMUST00000072232.8  | 1.744789448 | MGI:1355315 | Tmod3         |
| ENSMUST00000030434.4  | 1.790081337 | MGI:95593   | Fuca1         |
| ENSMUST00000057208.12 | 1.790081337 | MGI:1916777 | Mrps9         |
| ENSMUST00000124549.8  | 1.833994509 | MGI:1916406 | Comtd1        |
| ENSMUST00000026976.11 | 1.833994509 | MGI:1914854 | Get4          |
| ENSMUST00000090811.10 | 1.918003545 | MGI:1921866 | Scrn3         |
| ENSMUST00000211939.1  | 1.918003545 | MGI:109299  | Polr2c        |
| ENSMUST00000021204.3  | 1.95824208  | MGI:109331  | Nxn           |
